# Supplementary material for: Discovery of Novel 3-Hydroxyquinazoline-2,4(1H,3H)-Dione Derivatives: A Series of Metal Ion Chelators with Potent Anti-HCV Activities
Source: MDPI journal article supplement (doi:10.3390/ijms23115930), 2022-05-25
Supplement: s1 [file s1]

# **Discovery of Novel 3-Hydroxyquinazoline-2,4(1*H*,3*H*)-dione Derivatives: A Series of Metal Ion Chelators with Potent Anti-HCV Activities**

**Yang Cao <sup>1</sup>, Abudumijiti Aimaiti <sup>2</sup>, Zeyun Zhu <sup>1</sup>, Lu Zhou <sup>1,\*</sup> and Deyong Ye <sup>1,\*</sup>**

<sup>1</sup> Department of Medicinal Chemistry, School of Pharmacy, Fudan University, 826 Zhangheng Rd, Shanghai 201203, P.R. China; ycao14@fudan.edu.cn (Y.C.); traveller-zzy@outlook.com (Z.Z.)

<sup>2</sup> Shanghai Medical College, Fudan University, 130 Dongan Rd, Shanghai 200032, P.R. China; abu@fudan.edu.cn

\* Correspondence: dyeye@shmu.edu.cn (D.Y.); zhoululu@fudan.edu.cn (L.Z.)

## Table of Contents

|                                                                                                                    |    |
|--------------------------------------------------------------------------------------------------------------------|----|
| <b>Figure S1.</b> $^1\text{H}$ NMR (400 MHz, $\text{DMSO-}d_6$ ) spectrum of <b>10a</b> .....                      | 7  |
| <b>Figure S2.</b> Magnified $^1\text{H}$ NMR (400 MHz, $\text{DMSO-}d_6$ ) spectrum fragments of <b>10a</b> .....  | 7  |
| <b>Figure S3.</b> $^{13}\text{C}$ NMR (151 MHz, $\text{DMSO-}d_6$ ) spectrum of <b>10a</b> .....                   | 8  |
| <b>Figure S4.</b> Mass spectrum (negative ionization) of <b>10a</b> .....                                          | 9  |
| <b>Figure S5.</b> $^1\text{H}$ NMR (400 MHz, $\text{DMSO-}d_6$ ) spectrum of <b>10b</b> .....                      | 10 |
| <b>Figure S6.</b> Magnified $^1\text{H}$ NMR (400 MHz, $\text{DMSO-}d_6$ ) spectrum fragments of <b>10b</b> .....  | 10 |
| <b>Figure S7.</b> $^{13}\text{C}$ NMR (151 MHz, $\text{DMSO-}d_6$ ) spectrum of <b>10b</b> .....                   | 11 |
| <b>Figure S8.</b> $^1\text{H}$ NMR (400 MHz, $\text{DMSO-}d_6$ ) spectrum of <b>10c</b> .....                      | 11 |
| <b>Figure S9.</b> Magnified $^1\text{H}$ NMR (400 MHz, $\text{DMSO-}d_6$ ) spectrum fragments of <b>10c</b> .....  | 12 |
| <b>Figure S10.</b> $^{13}\text{C}$ NMR (151 MHz, $\text{DMSO-}d_6$ ) spectrum of <b>10c</b> .....                  | 12 |
| <b>Figure S11.</b> $^1\text{H}$ NMR (400 MHz, $\text{DMSO-}d_6$ ) spectrum of <b>10d</b> .....                     | 13 |
| <b>Figure S12.</b> Magnified $^1\text{H}$ NMR (400 MHz, $\text{DMSO-}d_6$ ) spectrum fragments of <b>10d</b> ..... | 13 |
| <b>Figure S13.</b> $^{13}\text{C}$ NMR (151 MHz, $\text{DMSO-}d_6$ ) spectrum of <b>10d</b> .....                  | 14 |
| <b>Figure S14.</b> $^1\text{H}$ NMR (400 MHz, $\text{DMSO-}d_6$ ) spectrum of <b>10e</b> .....                     | 14 |
| <b>Figure S15.</b> Magnified $^1\text{H}$ NMR (400 MHz, $\text{DMSO-}d_6$ ) spectrum fragments of <b>10e</b> ..... | 15 |
| <b>Figure S16.</b> $^{13}\text{C}$ NMR (151 MHz, $\text{DMSO-}d_6$ ) spectrum of <b>10e</b> .....                  | 15 |
| <b>Figure S17.</b> $^1\text{H}$ NMR (400 MHz, $\text{DMSO-}d_6$ ) spectrum of <b>10f</b> .....                     | 16 |
| <b>Figure S18.</b> Magnified $^1\text{H}$ NMR (400 MHz, $\text{DMSO-}d_6$ ) spectrum fragments of <b>10f</b> ..... | 16 |
| <b>Figure S19.</b> $^{13}\text{C}$ NMR (151 MHz, $\text{DMSO-}d_6$ ) spectrum of <b>10f</b> .....                  | 17 |
| <b>Figure S20.</b> $^1\text{H}$ NMR (400 MHz, $\text{DMSO-}d_6$ ) spectrum of <b>10g</b> .....                     | 17 |
| <b>Figure S21.</b> Magnified $^1\text{H}$ NMR (400 MHz, $\text{DMSO-}d_6$ ) spectrum fragments of <b>10g</b> ..... | 18 |
| <b>Figure S22.</b> $^{13}\text{C}$ NMR (151 MHz, $\text{DMSO-}d_6$ ) spectrum of <b>10g</b> .....                  | 18 |
| <b>Figure S23.</b> $^1\text{H}$ NMR (400 MHz, $\text{DMSO-}d_6$ ) spectrum of <b>10h</b> .....                     | 19 |
| <b>Figure S24.</b> Magnified $^1\text{H}$ NMR (400 MHz, $\text{DMSO-}d_6$ ) spectrum fragments of <b>10h</b> ..... | 19 |
| <b>Figure S25.</b> $^{13}\text{C}$ NMR (151 MHz, $\text{DMSO-}d_6$ ) spectrum of <b>10h</b> .....                  | 20 |
| <b>Figure S26.</b> $^1\text{H}$ NMR (400 MHz, $\text{DMSO-}d_6$ ) spectrum of <b>10i</b> .....                     | 20 |
| <b>Figure S27.</b> Magnified $^1\text{H}$ NMR (400 MHz, $\text{DMSO-}d_6$ ) spectrum fragments of <b>10i</b> ..... | 21 |
| <b>Figure S28.</b> $^{13}\text{C}$ NMR (151 MHz, $\text{DMSO-}d_6$ ) spectrum of <b>10i</b> .....                  | 21 |
| <b>Figure S29.</b> $^1\text{H}$ NMR (400 MHz, $\text{DMSO-}d_6$ ) spectrum of <b>10j</b> .....                     | 22 |
| <b>Figure S30.</b> Magnified $^1\text{H}$ NMR (400 MHz, $\text{DMSO-}d_6$ ) spectrum fragments of <b>10j</b> ..... | 22 |
| <b>Figure S31.</b> $^{13}\text{C}$ NMR (151 MHz, $\text{DMSO-}d_6$ ) spectrum of <b>10j</b> .....                  | 23 |
| <b>Figure S32.</b> $^1\text{H}$ NMR (400 MHz, $\text{DMSO-}d_6$ ) spectrum of <b>10k</b> .....                     | 23 |
| <b>Figure S33.</b> Magnified $^1\text{H}$ NMR (400 MHz, $\text{DMSO-}d_6$ ) spectrum fragments of <b>10k</b> ..... | 24 |
| <b>Figure S34.</b> $^{13}\text{C}$ NMR (151 MHz, $\text{DMSO-}d_6$ ) spectrum of <b>10k</b> .....                  | 24 |
| <b>Figure S35.</b> $^1\text{H}$ NMR (400 MHz, $\text{DMSO-}d_6$ ) spectrum of <b>10l</b> .....                     | 25 |
| <b>Figure S36.</b> Magnified $^1\text{H}$ NMR (400 MHz, $\text{DMSO-}d_6$ ) spectrum fragments of <b>10l</b> ..... | 25 |
| <b>Figure S37.</b> $^{13}\text{C}$ NMR (151 MHz, $\text{DMSO-}d_6$ ) spectrum of <b>10l</b> .....                  | 26 |
| <b>Figure S38.</b> $^1\text{H}$ NMR (400 MHz, $\text{DMSO-}d_6$ ) spectrum of <b>10m</b> .....                     | 26 |
| <b>Figure S39.</b> Magnified $^1\text{H}$ NMR (400 MHz, $\text{DMSO-}d_6$ ) spectrum fragments of <b>10m</b> ..... | 27 |
| <b>Figure S40.</b> $^{13}\text{C}$ NMR (151 MHz, $\text{DMSO-}d_6$ ) spectrum of <b>10m</b> .....                  | 27 |
| <b>Figure S41.</b> $^1\text{H}$ NMR (400 MHz, $\text{DMSO-}d_6$ ) spectrum of <b>10n</b> .....                     | 28 |
| <b>Figure S42.</b> Magnified $^1\text{H}$ NMR (400 MHz, $\text{DMSO-}d_6$ ) spectrum fragments of <b>10n</b> ..... | 28 |

|                                                                                                                    |    |
|--------------------------------------------------------------------------------------------------------------------|----|
| <b>Figure S43.</b> $^{13}\text{C}$ NMR (151 MHz, $\text{DMSO-}d_6$ ) spectrum of <b>10n</b> .....                  | 29 |
| <b>Figure S44.</b> $^1\text{H}$ NMR (400 MHz, $\text{DMSO-}d_6$ ) spectrum of <b>10o</b> .....                     | 29 |
| <b>Figure S45.</b> Magnified $^1\text{H}$ NMR (400 MHz, $\text{DMSO-}d_6$ ) spectrum fragments of <b>10o</b> ..... | 30 |
| <b>Figure S46.</b> $^{13}\text{C}$ NMR (151 MHz, $\text{DMSO-}d_6$ ) spectrum of <b>10o</b> .....                  | 30 |
| <b>Figure S47.</b> $^1\text{H}$ NMR (400 MHz, $\text{DMSO-}d_6$ ) spectrum of <b>10p</b> .....                     | 31 |
| <b>Figure S48.</b> Magnified $^1\text{H}$ NMR (400 MHz, $\text{DMSO-}d_6$ ) spectrum fragments of <b>10p</b> ..... | 31 |
| <b>Figure S49.</b> $^{13}\text{C}$ NMR (151 MHz, $\text{DMSO-}d_6$ ) spectrum of <b>10p</b> .....                  | 32 |
| <b>Figure S50.</b> $^1\text{H}$ NMR (400 MHz, $\text{DMSO-}d_6$ ) spectrum of <b>18a</b> .....                     | 32 |
| <b>Figure S51.</b> Magnified $^1\text{H}$ NMR (400 MHz, $\text{DMSO-}d_6$ ) spectrum fragments of <b>18a</b> ..... | 33 |
| <b>Figure S52.</b> $^{13}\text{C}$ NMR (151 MHz, $\text{DMSO-}d_6$ ) spectrum of <b>18a</b> .....                  | 33 |
| <b>Figure S53.</b> Mass spectrum (negative ionization) of <b>18a</b> .....                                         | 34 |
| <b>Figure S54.</b> $^1\text{H}$ NMR (400 MHz, $\text{DMSO-}d_6$ ) spectrum of <b>18b</b> .....                     | 35 |
| <b>Figure S55.</b> Magnified $^1\text{H}$ NMR (400 MHz, $\text{DMSO-}d_6$ ) spectrum fragments of <b>18b</b> ..... | 35 |
| <b>Figure S56.</b> $^{13}\text{C}$ NMR (151 MHz, $\text{DMSO-}d_6$ ) spectrum of <b>18b</b> .....                  | 36 |
| <b>Figure S57.</b> $^1\text{H}$ NMR (400 MHz, $\text{DMSO-}d_6$ ) spectrum of <b>18c</b> .....                     | 36 |
| <b>Figure S58.</b> Magnified $^1\text{H}$ NMR (400 MHz, $\text{DMSO-}d_6$ ) spectrum fragments of <b>18c</b> ..... | 37 |
| <b>Figure S59.</b> $^{13}\text{C}$ NMR (151 MHz, $\text{DMSO-}d_6$ ) spectrum of <b>18c</b> .....                  | 37 |
| <b>Figure S60.</b> Mass spectrum (negative ionization) of <b>18c</b> .....                                         | 38 |
| <b>Figure S61.</b> $^1\text{H}$ NMR (400 MHz, $\text{DMSO-}d_6$ ) spectrum of <b>19</b> .....                      | 39 |
| <b>Figure S62.</b> $^{13}\text{C}$ NMR (151 MHz, $\text{DMSO-}d_6$ ) spectrum of <b>19</b> .....                   | 39 |
| <b>Figure S63.</b> Mass spectrum (negative ionization) of <b>19</b> .....                                          | 40 |
| <b>Figure S64.</b> $^1\text{H}$ NMR (400 MHz, $\text{DMSO-}d_6$ ) spectrum of <b>21a</b> .....                     | 41 |
| <b>Figure S65.</b> Magnified $^1\text{H}$ NMR (400 MHz, $\text{DMSO-}d_6$ ) spectrum fragments of <b>21a</b> ..... | 41 |
| <b>Figure S66.</b> $^{13}\text{C}$ NMR (151 MHz, $\text{DMSO-}d_6$ ) spectrum of <b>21a</b> .....                  | 42 |
| <b>Figure S67.</b> Mass spectrum (negative ionization) of <b>21a</b> .....                                         | 43 |
| <b>Figure S68.</b> $^1\text{H}$ NMR (400 MHz, $\text{DMSO-}d_6$ ) spectrum of <b>21b</b> .....                     | 44 |
| <b>Figure S69.</b> Magnified $^1\text{H}$ NMR (400 MHz, $\text{DMSO-}d_6$ ) spectrum fragments of <b>21b</b> ..... | 44 |
| <b>Figure S70.</b> $^{13}\text{C}$ NMR (151 MHz, $\text{DMSO-}d_6$ ) spectrum of <b>21b</b> .....                  | 45 |
| <b>Figure S71.</b> $^1\text{H}$ NMR (400 MHz, $\text{DMSO-}d_6$ ) spectrum of <b>21c</b> .....                     | 45 |
| <b>Figure S72.</b> Magnified $^1\text{H}$ NMR (400 MHz, $\text{DMSO-}d_6$ ) spectrum fragments of <b>21c</b> ..... | 46 |
| <b>Figure S73.</b> $^{13}\text{C}$ NMR (151 MHz, $\text{DMSO-}d_6$ ) spectrum of <b>21c</b> .....                  | 46 |
| <b>Figure S74.</b> Mass spectrum (negative ionization) of <b>21c</b> .....                                         | 47 |
| <b>Figure S75.</b> $^1\text{H}$ NMR (400 MHz, $\text{DMSO-}d_6$ ) spectrum of <b>21d</b> .....                     | 48 |
| <b>Figure S76.</b> Magnified $^1\text{H}$ NMR (400 MHz, $\text{DMSO-}d_6$ ) spectrum fragments of <b>21d</b> ..... | 48 |
| <b>Figure S77.</b> $^{13}\text{C}$ NMR (151 MHz, $\text{DMSO-}d_6$ ) spectrum of <b>21d</b> .....                  | 49 |
| <b>Figure S78.</b> Mass spectrum (negative ionization) of <b>21d</b> .....                                         | 50 |
| <b>Figure S79.</b> $^1\text{H}$ NMR (400 MHz, $\text{DMSO-}d_6$ ) spectrum of <b>21e</b> .....                     | 51 |
| <b>Figure S80.</b> Magnified $^1\text{H}$ NMR (400 MHz, $\text{DMSO-}d_6$ ) spectrum fragments of <b>21e</b> ..... | 51 |
| <b>Figure S81.</b> $^{13}\text{C}$ NMR (151 MHz, $\text{DMSO-}d_6$ ) spectrum of <b>21e</b> .....                  | 52 |
| <b>Figure S82.</b> Mass spectrum (negative ionization) of <b>21e</b> .....                                         | 53 |
| <b>Figure S83.</b> $^1\text{H}$ NMR (400 MHz, $\text{DMSO-}d_6$ ) spectrum of <b>21f</b> .....                     | 54 |
| <b>Figure S84.</b> Magnified $^1\text{H}$ NMR (400 MHz, $\text{DMSO-}d_6$ ) spectrum fragments of <b>21f</b> ..... | 54 |
| <b>Figure S85.</b> $^{13}\text{C}$ NMR (151 MHz, $\text{DMSO-}d_6$ ) spectrum of <b>21f</b> .....                  | 55 |
| <b>Figure S86.</b> Mass spectrum (negative ionization) of <b>21f</b> .....                                         | 56 |

|                                                                                                               |    |
|---------------------------------------------------------------------------------------------------------------|----|
| <b>Figure S87.</b> $^1\text{H}$ NMR (400 MHz, DMSO- $d_6$ ) spectrum of <b>21g</b> .....                      | 57 |
| <b>Figure S88.</b> Magnified $^1\text{H}$ NMR (400 MHz, DMSO- $d_6$ ) spectrum fragments of <b>21g</b> .....  | 57 |
| <b>Figure S89.</b> $^{13}\text{C}$ NMR (151 MHz, DMSO- $d_6$ ) spectrum of <b>21g</b> .....                   | 58 |
| <b>Figure S90.</b> Mass spectrum (negative ionization) of <b>21g</b> .....                                    | 59 |
| <b>Figure S91.</b> $^1\text{H}$ NMR (400 MHz, DMSO- $d_6$ ) spectrum of <b>21h</b> .....                      | 60 |
| <b>Figure S92.</b> Magnified $^1\text{H}$ NMR (400 MHz, DMSO- $d_6$ ) spectrum fragments of <b>21h</b> .....  | 60 |
| <b>Figure S93.</b> $^{13}\text{C}$ NMR (151 MHz, DMSO- $d_6$ ) spectrum of <b>21h</b> .....                   | 61 |
| <b>Figure S94.</b> $^1\text{H}$ NMR (400 MHz, DMSO- $d_6$ ) spectrum of <b>21i</b> .....                      | 61 |
| <b>Figure S95.</b> Magnified $^1\text{H}$ NMR (400 MHz, DMSO- $d_6$ ) spectrum fragments of <b>21i</b> .....  | 62 |
| <b>Figure S96.</b> $^{13}\text{C}$ NMR (151 MHz, DMSO- $d_6$ ) spectrum of <b>21i</b> .....                   | 62 |
| <b>Figure S97.</b> Mass spectrum (negative ionization) of <b>21i</b> .....                                    | 63 |
| <b>Figure S98.</b> $^1\text{H}$ NMR (400 MHz, DMSO- $d_6$ ) spectrum of <b>21j</b> .....                      | 64 |
| <b>Figure S99.</b> Magnified $^1\text{H}$ NMR (400 MHz, DMSO- $d_6$ ) spectrum fragments of <b>21j</b> .....  | 64 |
| <b>Figure S100.</b> $^{13}\text{C}$ NMR (151 MHz, DMSO- $d_6$ ) spectrum of <b>21j</b> .....                  | 65 |
| <b>Figure S101.</b> Mass spectrum (negative ionization) of <b>21j</b> .....                                   | 66 |
| <b>Figure S102.</b> $^1\text{H}$ NMR (400 MHz, DMSO- $d_6$ ) spectrum of <b>21k</b> .....                     | 67 |
| <b>Figure S103.</b> Magnified $^1\text{H}$ NMR (400 MHz, DMSO- $d_6$ ) spectrum fragments of <b>21k</b> ..... | 67 |
| <b>Figure S104.</b> $^{13}\text{C}$ NMR (151 MHz, DMSO- $d_6$ ) spectrum of <b>21k</b> .....                  | 68 |
| <b>Figure S105.</b> Mass spectrum (negative ionization) of <b>21k</b> .....                                   | 69 |
| <b>Figure S106.</b> $^1\text{H}$ NMR (400 MHz, DMSO- $d_6$ ) spectrum of <b>21l</b> .....                     | 70 |
| <b>Figure S107.</b> Magnified $^1\text{H}$ NMR (400 MHz, DMSO- $d_6$ ) spectrum fragments of <b>21l</b> ..... | 70 |
| <b>Figure S108.</b> $^{13}\text{C}$ NMR (151 MHz, DMSO- $d_6$ ) spectrum of <b>21l</b> .....                  | 71 |
| <b>Figure S109.</b> $^1\text{H}$ NMR (400 MHz, DMSO- $d_6$ ) spectrum of <b>21m</b> .....                     | 71 |
| <b>Figure S110.</b> Magnified $^1\text{H}$ NMR (400 MHz, DMSO- $d_6$ ) spectrum fragments of <b>21m</b> ..... | 72 |
| <b>Figure S111.</b> $^{13}\text{C}$ NMR (151 MHz, DMSO- $d_6$ ) spectrum of <b>21m</b> .....                  | 72 |
| <b>Figure S112.</b> Mass spectrum (positive ionization) of <b>21m</b> .....                                   | 73 |
| <b>Figure S113.</b> $^1\text{H}$ NMR (400 MHz, DMSO- $d_6$ ) spectrum of <b>21n</b> .....                     | 74 |
| <b>Figure S114.</b> Magnified $^1\text{H}$ NMR (400 MHz, DMSO- $d_6$ ) spectrum fragments of <b>21n</b> ..... | 74 |
| <b>Figure S115.</b> $^{13}\text{C}$ NMR (151 MHz, DMSO- $d_6$ ) spectrum of <b>21n</b> .....                  | 75 |
| <b>Figure S116.</b> Mass spectrum (positive ionization) of <b>21n</b> .....                                   | 76 |
| <b>Figure S117.</b> $^1\text{H}$ NMR (400 MHz, DMSO- $d_6$ ) spectrum of <b>21o</b> .....                     | 77 |
| <b>Figure S118.</b> Magnified $^1\text{H}$ NMR (400 MHz, DMSO- $d_6$ ) spectrum fragments of <b>21o</b> ..... | 77 |
| <b>Figure S119.</b> $^{13}\text{C}$ NMR (151 MHz, DMSO- $d_6$ ) spectrum of <b>21o</b> .....                  | 78 |
| <b>Figure S120.</b> Mass spectrum (positive ionization) of <b>21o</b> .....                                   | 79 |
| <b>Figure S121.</b> $^1\text{H}$ NMR (400 MHz, DMSO- $d_6$ ) spectrum of <b>21p</b> .....                     | 80 |
| <b>Figure S122.</b> Magnified $^1\text{H}$ NMR (400 MHz, DMSO- $d_6$ ) spectrum fragments of <b>21p</b> ..... | 80 |
| <b>Figure S123.</b> $^{13}\text{C}$ NMR (151 MHz, DMSO- $d_6$ ) spectrum of <b>21p</b> .....                  | 81 |
| <b>Figure S124.</b> Mass spectrum (positive ionization) of <b>21p</b> .....                                   | 82 |
| <b>Figure S125.</b> $^1\text{H}$ NMR (400 MHz, DMSO- $d_6$ ) spectrum of <b>21q</b> .....                     | 83 |
| <b>Figure S126.</b> Magnified $^1\text{H}$ NMR (400 MHz, DMSO- $d_6$ ) spectrum fragments of <b>21q</b> ..... | 83 |
| <b>Figure S127.</b> $^{13}\text{C}$ NMR (151 MHz, DMSO- $d_6$ ) spectrum of <b>21q</b> .....                  | 84 |
| <b>Figure S128.</b> $^1\text{H}$ NMR (400 MHz, DMSO- $d_6$ ) spectrum of <b>21r</b> .....                     | 84 |
| <b>Figure S129.</b> Magnified $^1\text{H}$ NMR (400 MHz, DMSO- $d_6$ ) spectrum fragments of <b>21r</b> ..... | 85 |
| <b>Figure S130.</b> $^{13}\text{C}$ NMR (151 MHz, DMSO- $d_6$ ) spectrum of <b>21r</b> .....                  | 85 |



|                                                                                                                     |     |
|---------------------------------------------------------------------------------------------------------------------|-----|
| <b>Figure S131.</b> $^1\text{H}$ NMR (400 MHz, $\text{DMSO-}d_6$ ) spectrum of <b>21s</b> .....                     | 86  |
| <b>Figure S132.</b> Magnified $^1\text{H}$ NMR (400 MHz, $\text{DMSO-}d_6$ ) spectrum fragments of <b>21s</b> ..... | 86  |
| <b>Figure S133.</b> $^{13}\text{C}$ NMR (151 MHz, $\text{DMSO-}d_6$ ) spectrum of <b>21s</b> .....                  | 87  |
| <b>Figure S134.</b> $^1\text{H}$ NMR (400 MHz, $\text{DMSO-}d_6$ ) spectrum of <b>21t</b> .....                     | 87  |
| <b>Figure S135.</b> Magnified $^1\text{H}$ NMR (400 MHz, $\text{DMSO-}d_6$ ) spectrum fragments of <b>21t</b> ..... | 88  |
| <b>Figure S136.</b> $^{13}\text{C}$ NMR (151 MHz, $\text{DMSO-}d_6$ ) spectrum of <b>21t</b> .....                  | 88  |
| <b>Figure S137.</b> Mass spectrum (negative ionization) of <b>21t</b> .....                                         | 89  |
| <b>Figure S138.</b> $^1\text{H}$ NMR (400 MHz, $\text{DMSO-}d_6$ ) spectrum of <b>21u</b> .....                     | 90  |
| <b>Figure S139.</b> Magnified $^1\text{H}$ NMR (400 MHz, $\text{DMSO-}d_6$ ) spectrum fragments of <b>21u</b> ..... | 90  |
| <b>Figure S140.</b> $^{13}\text{C}$ NMR (151 MHz, $\text{DMSO-}d_6$ ) spectrum of <b>21u</b> .....                  | 91  |
| <b>Figure S141.</b> $^1\text{H}$ NMR (400 MHz, $\text{DMSO-}d_6$ ) spectrum of <b>21v</b> .....                     | 91  |
| <b>Figure S142.</b> Magnified $^1\text{H}$ NMR (400 MHz, $\text{DMSO-}d_6$ ) spectrum fragments of <b>21v</b> ..... | 92  |
| <b>Figure S143.</b> $^{13}\text{C}$ NMR (151 MHz, $\text{DMSO-}d_6$ ) spectrum of <b>21v</b> .....                  | 92  |
| <b>Figure S144.</b> $^1\text{H}$ NMR (400 MHz, $\text{DMSO-}d_6$ ) spectrum of <b>21w</b> .....                     | 93  |
| <b>Figure S145.</b> Magnified $^1\text{H}$ NMR (400 MHz, $\text{DMSO-}d_6$ ) spectrum fragments of <b>21w</b> ..... | 93  |
| <b>Figure S146.</b> $^{13}\text{C}$ NMR (151 MHz, $\text{DMSO-}d_6$ ) spectrum of <b>21w</b> .....                  | 94  |
| <b>Figure S147.</b> Mass spectrum (negative ionization) of <b>21w</b> .....                                         | 95  |
| <b>Figure S148.</b> $^1\text{H}$ NMR (400 MHz, $\text{DMSO-}d_6$ ) spectrum of <b>21x</b> .....                     | 96  |
| <b>Figure S149.</b> Magnified $^1\text{H}$ NMR (400 MHz, $\text{DMSO-}d_6$ ) spectrum fragments of <b>21x</b> ..... | 96  |
| <b>Figure S150.</b> $^{13}\text{C}$ NMR (151 MHz, $\text{DMSO-}d_6$ ) spectrum of <b>21x</b> .....                  | 97  |
| <b>Figure S151.</b> Mass spectrum (negative ionization) of <b>21x</b> .....                                         | 98  |
| <b>Figure S152.</b> $^1\text{H}$ NMR (400 MHz, $\text{DMSO-}d_6$ ) spectrum of <b>23a</b> .....                     | 99  |
| <b>Figure S153.</b> Magnified $^1\text{H}$ NMR (400 MHz, $\text{DMSO-}d_6$ ) spectrum fragments of <b>23a</b> ..... | 99  |
| <b>Figure S154.</b> $^{13}\text{C}$ NMR (151 MHz, $\text{DMSO-}d_6$ ) spectrum of <b>23a</b> .....                  | 100 |
| <b>Figure S155.</b> Mass spectrum (negative ionization) of <b>23a</b> .....                                         | 101 |
| <b>Figure S156.</b> $^1\text{H}$ NMR (400 MHz, $\text{DMSO-}d_6$ ) spectrum of <b>23b</b> .....                     | 102 |
| <b>Figure S157.</b> Magnified $^1\text{H}$ NMR (400 MHz, $\text{DMSO-}d_6$ ) spectrum fragments of <b>23b</b> ..... | 102 |
| <b>Figure S158.</b> $^{13}\text{C}$ NMR (151 MHz, $\text{DMSO-}d_6$ ) spectrum of <b>23b</b> .....                  | 103 |
| <b>Figure S159.</b> $^1\text{H}$ NMR (400 MHz, $\text{DMSO-}d_6$ ) spectrum of <b>23c</b> .....                     | 103 |
| <b>Figure S160.</b> Magnified $^1\text{H}$ NMR (400 MHz, $\text{DMSO-}d_6$ ) spectrum fragments of <b>23c</b> ..... | 104 |
| <b>Figure S161.</b> $^{13}\text{C}$ NMR (151 MHz, $\text{DMSO-}d_6$ ) spectrum of <b>23c</b> .....                  | 104 |
| <b>Figure S162.</b> Mass spectrum (negative ionization) of <b>23c</b> .....                                         | 105 |
| <b>Figure S163.</b> $^1\text{H}$ NMR (400 MHz, $\text{DMSO-}d_6$ ) spectrum of <b>23d</b> .....                     | 106 |
| <b>Figure S164.</b> $^{13}\text{C}$ NMR (151 MHz, $\text{DMSO-}d_6$ ) spectrum of <b>23d</b> .....                  | 106 |
| <b>Figure S165.</b> Mass spectrum (negative ionization) of <b>23d</b> .....                                         | 107 |
| <b>Figure S166.</b> $^1\text{H}$ NMR (400 MHz, $\text{DMSO-}d_6$ ) spectrum of <b>23e</b> .....                     | 108 |
| <b>Figure S167.</b> Magnified $^1\text{H}$ NMR (400 MHz, $\text{DMSO-}d_6$ ) spectrum fragments of <b>23e</b> ..... | 108 |
| <b>Figure S168.</b> $^{13}\text{C}$ NMR (151 MHz, $\text{DMSO-}d_6$ ) spectrum of <b>23e</b> .....                  | 109 |
| <b>Figure S169.</b> Mass spectrum (negative ionization) of <b>23e</b> .....                                         | 110 |
| <b>Figure S170.</b> $^1\text{H}$ NMR (400 MHz, $\text{DMSO-}d_6$ ) spectrum of <b>23f</b> .....                     | 111 |
| <b>Figure S171.</b> Magnified $^1\text{H}$ NMR (400 MHz, $\text{DMSO-}d_6$ ) spectrum fragments of <b>23f</b> ..... | 111 |
| <b>Figure S172.</b> $^{13}\text{C}$ NMR (151 MHz, $\text{DMSO-}d_6$ ) spectrum of <b>23f</b> .....                  | 112 |
| <b>Figure S173.</b> $^1\text{H}$ NMR (400 MHz, $\text{DMSO-}d_6$ ) spectrum of <b>23g</b> .....                     | 112 |
| <b>Figure S174.</b> Magnified $^1\text{H}$ NMR (400 MHz, $\text{DMSO-}d_6$ ) spectrum fragments of <b>23g</b> ..... | 113 |

|                                                                                                                     |     |
|---------------------------------------------------------------------------------------------------------------------|-----|
| <b>Figure S175.</b> $^{13}\text{C}$ NMR (151 MHz, $\text{DMSO-}d_6$ ) spectrum of <b>23g</b> .....                  | 113 |
| <b>Figure S176.</b> $^1\text{H}$ NMR (400 MHz, $\text{DMSO-}d_6$ ) spectrum of <b>23h</b> .....                     | 114 |
| <b>Figure S177.</b> Magnified $^1\text{H}$ NMR (400 MHz, $\text{DMSO-}d_6$ ) spectrum fragments of <b>23h</b> ..... | 114 |
| <b>Figure S178.</b> $^{13}\text{C}$ NMR (151 MHz, $\text{DMSO-}d_6$ ) spectrum of <b>23h</b> .....                  | 115 |
| <b>Figure S179.</b> $^1\text{H}$ NMR (400 MHz, $\text{DMSO-}d_6$ ) spectrum of <b>23i</b> .....                     | 115 |
| <b>Figure S180.</b> Magnified $^1\text{H}$ NMR (400 MHz, $\text{DMSO-}d_6$ ) spectrum fragments of <b>23i</b> ..... | 116 |
| <b>Figure S181.</b> $^{13}\text{C}$ NMR (151 MHz, $\text{DMSO-}d_6$ ) spectrum of <b>23i</b> .....                  | 116 |
| <b>Figure S182.</b> Mass spectrum (positive ionization) of <b>23i</b> .....                                         | 117 |
| <b>Figure S183.</b> $^1\text{H}$ NMR (400 MHz, $\text{DMSO-}d_6$ ) spectrum of <b>23j</b> .....                     | 118 |
| <b>Figure S184.</b> Magnified $^1\text{H}$ NMR (400 MHz, $\text{DMSO-}d_6$ ) spectrum fragments of <b>23j</b> ..... | 118 |
| <b>Figure S185.</b> $^{13}\text{C}$ NMR (151 MHz, $\text{DMSO-}d_6$ ) spectrum of <b>23j</b> .....                  | 119 |

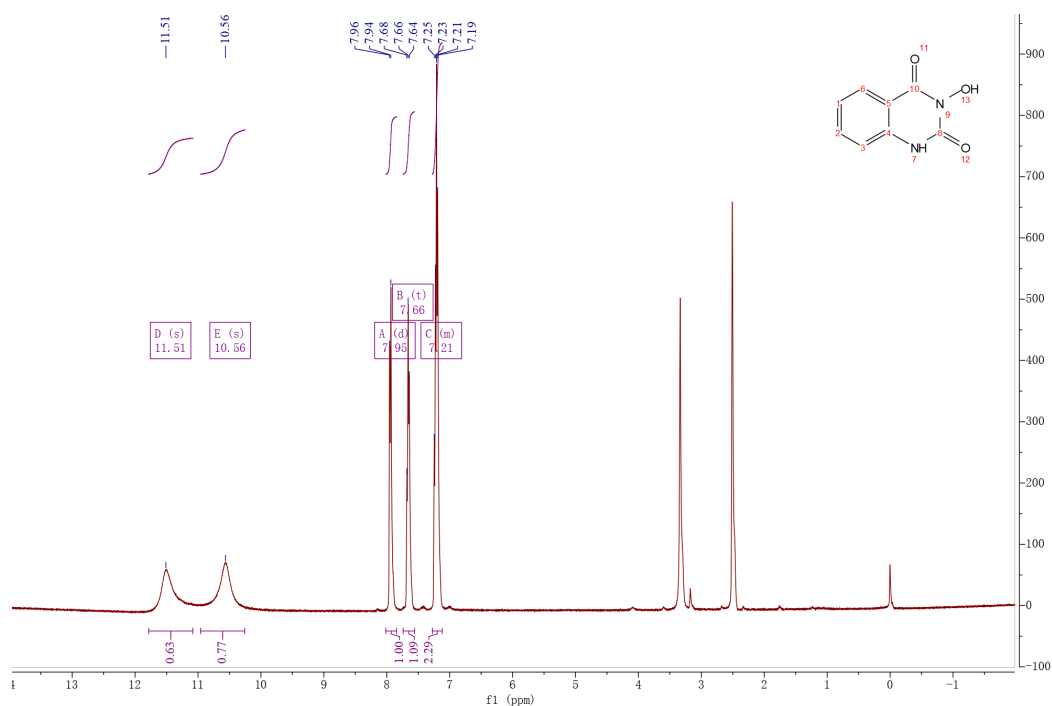

**Figure S1.**  $^1\text{H}$  NMR (400 MHz,  $\text{DMSO}-d_6$ ) spectrum of **10a**

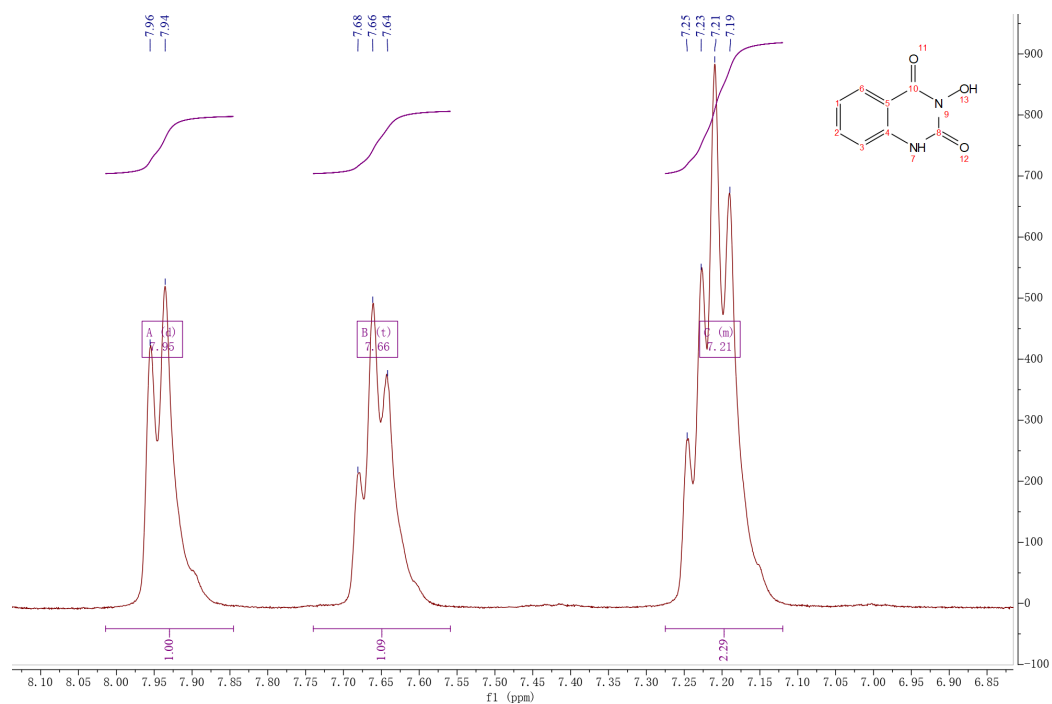

**Figure S2.** Magnified  $^1\text{H}$  NMR (400 MHz,  $\text{DMSO}-d_6$ ) spectrum fragments of **10a**

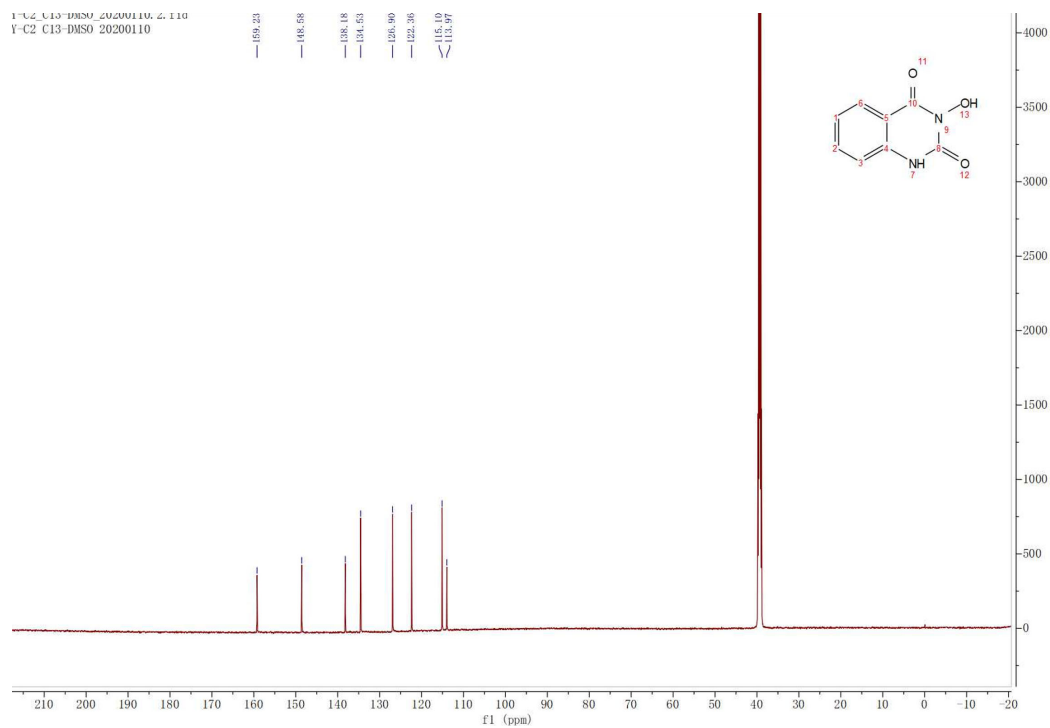

**Figure S3.** <sup>13</sup>C NMR (151 MHz, DMSO-*d*<sub>6</sub>) spectrum of **10a**

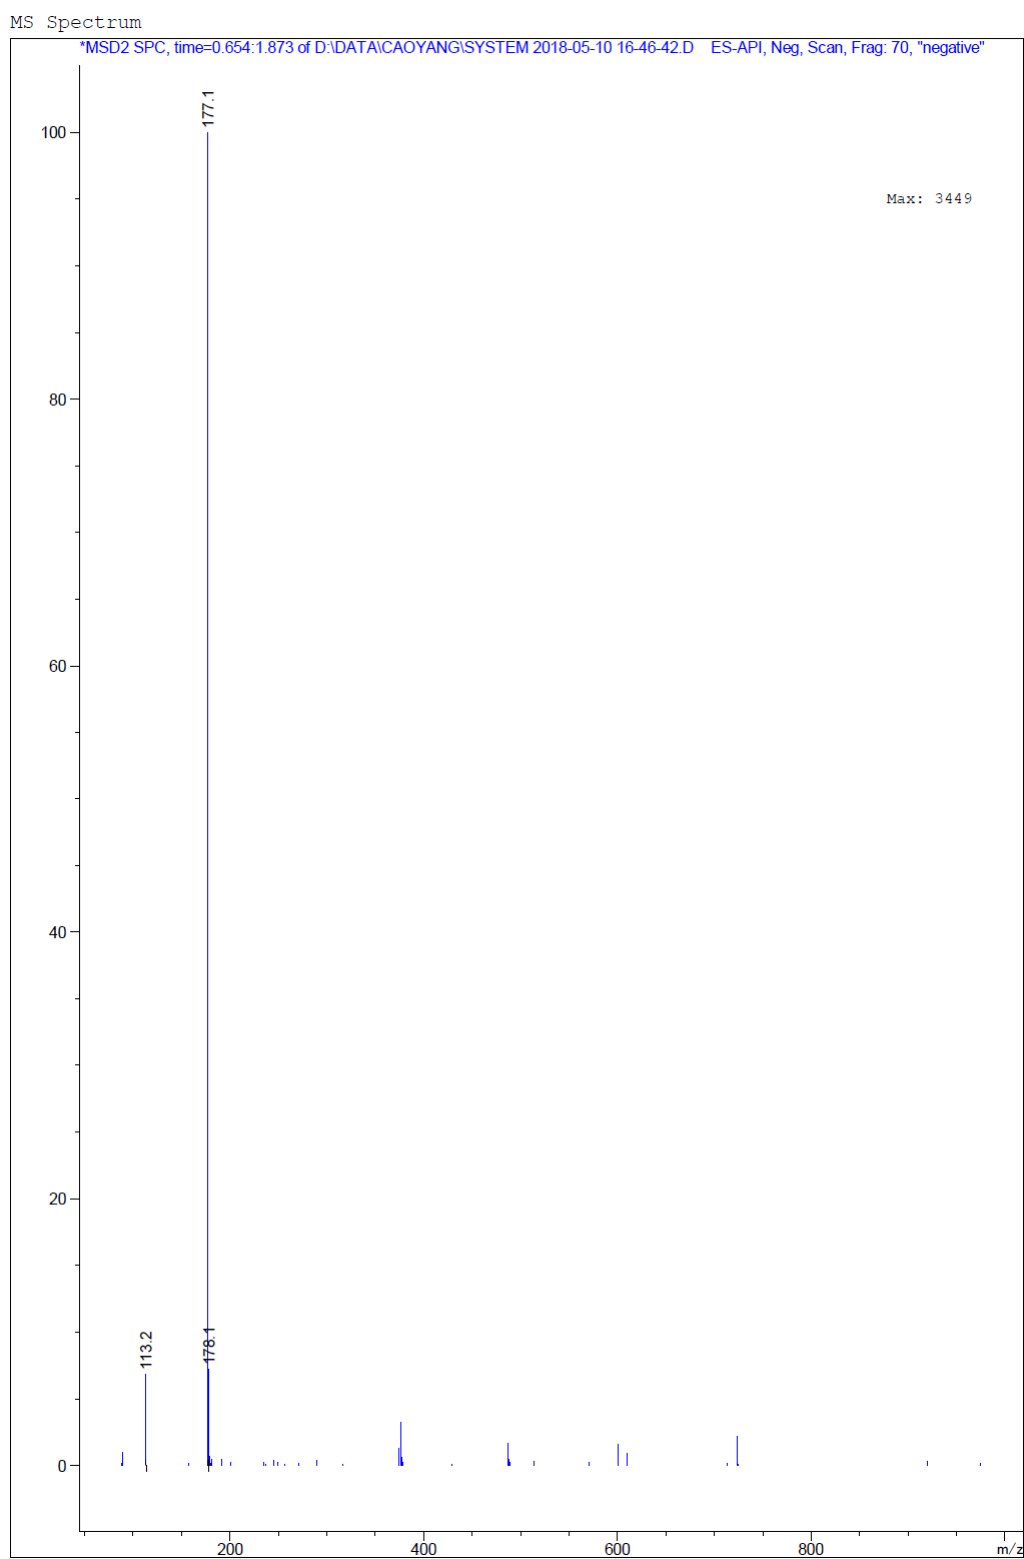

**Figure S4.** Mass spectrum (negative ionization) of **10a**

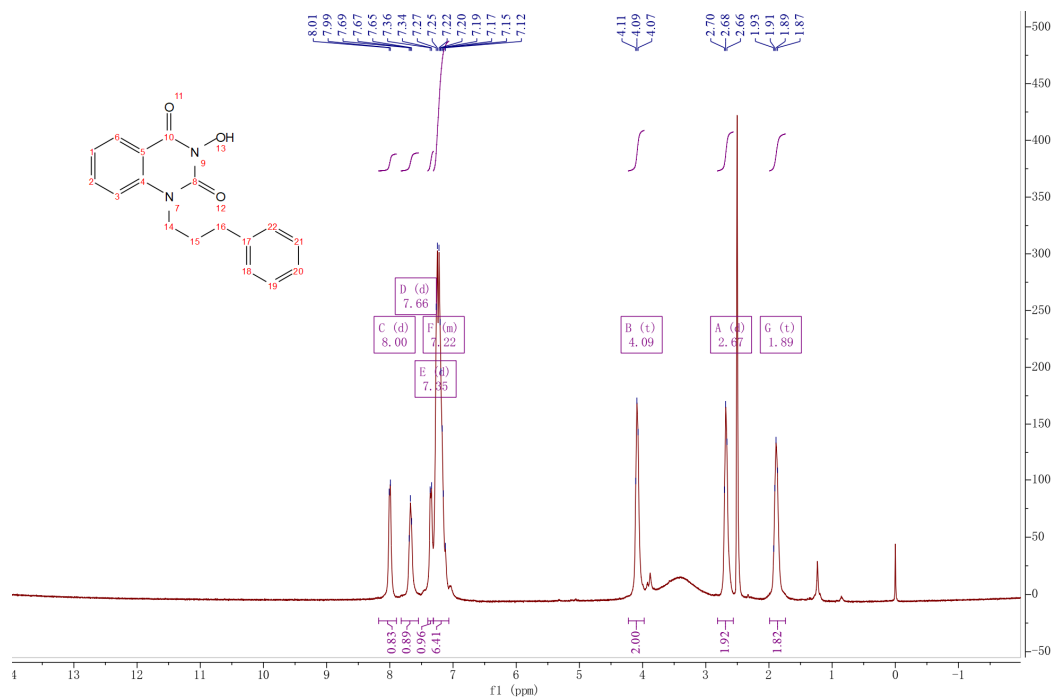

**Figure S5.**  $^1\text{H}$  NMR (400 MHz,  $\text{DMSO}-d_6$ ) spectrum of **10b**

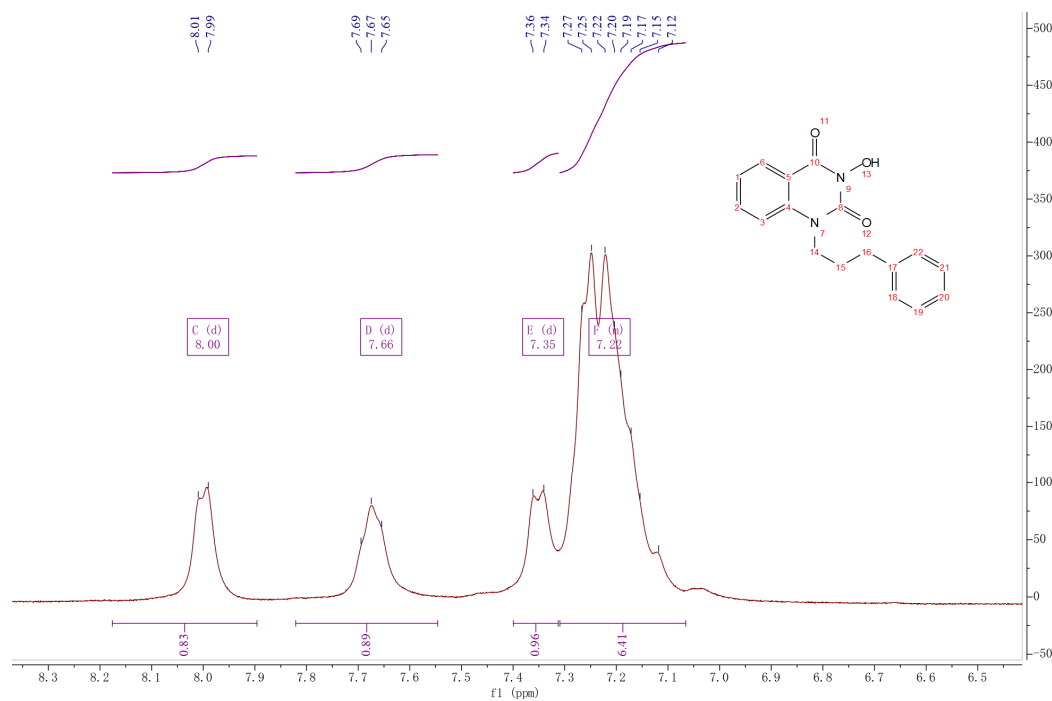

**Figure S6.** Magnified  $^1\text{H}$  NMR (400 MHz,  $\text{DMSO}-d_6$ ) spectrum fragments of **10b**

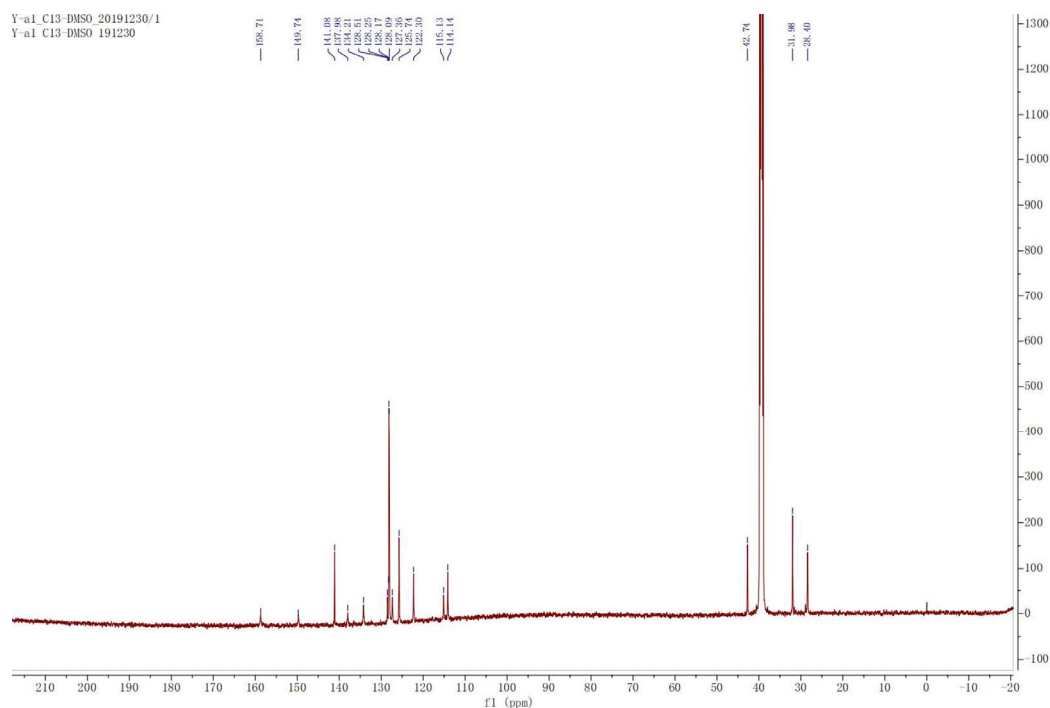

**Figure S7.**  $^{13}\text{C}$  NMR (151 MHz,  $\text{DMSO}-d_6$ ) spectrum of **10b**

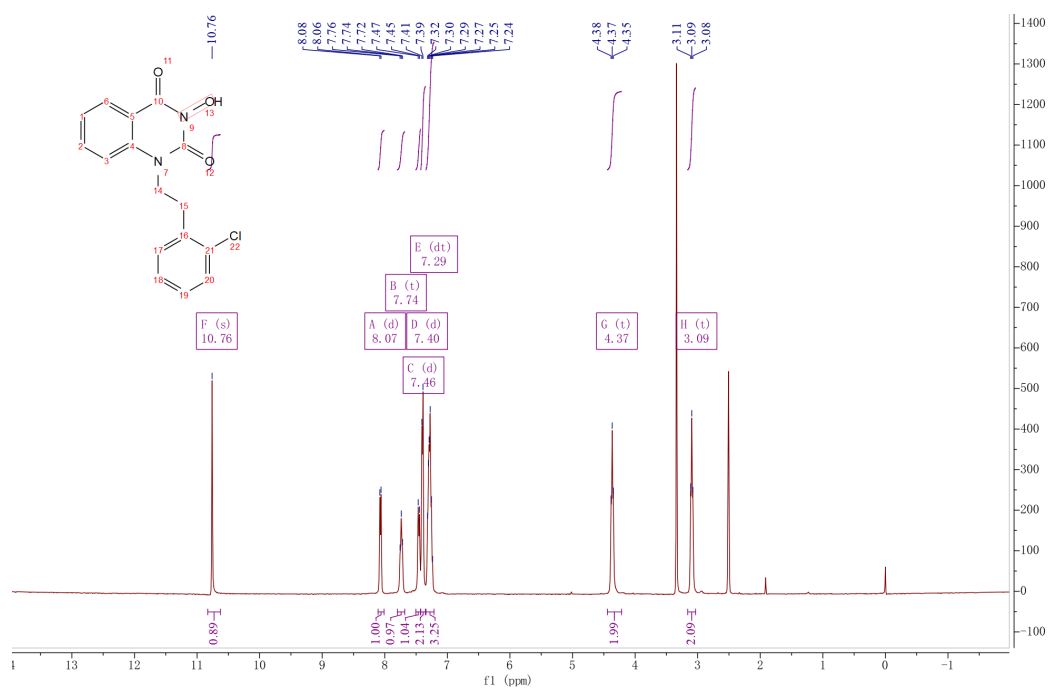

**Figure S8.**  $^1\text{H}$  NMR (400 MHz,  $\text{DMSO}-d_6$ ) spectrum of **10c**

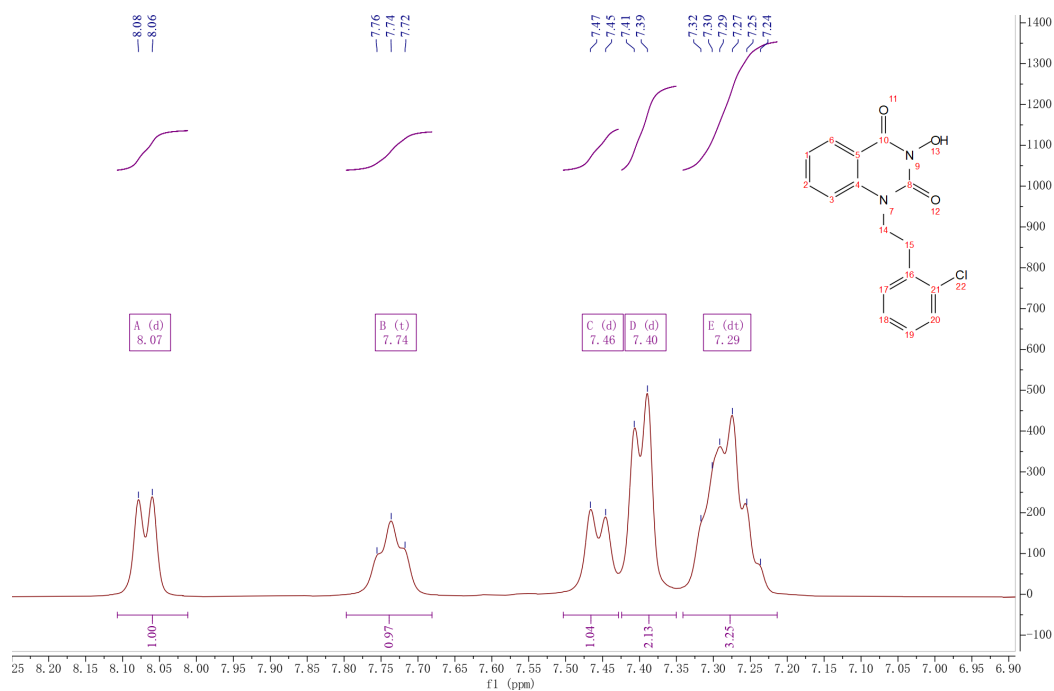

**Figure S9.** Magnified  $^1\text{H}$  NMR (400 MHz,  $\text{DMSO}-d_6$ ) spectrum fragments of **10c**

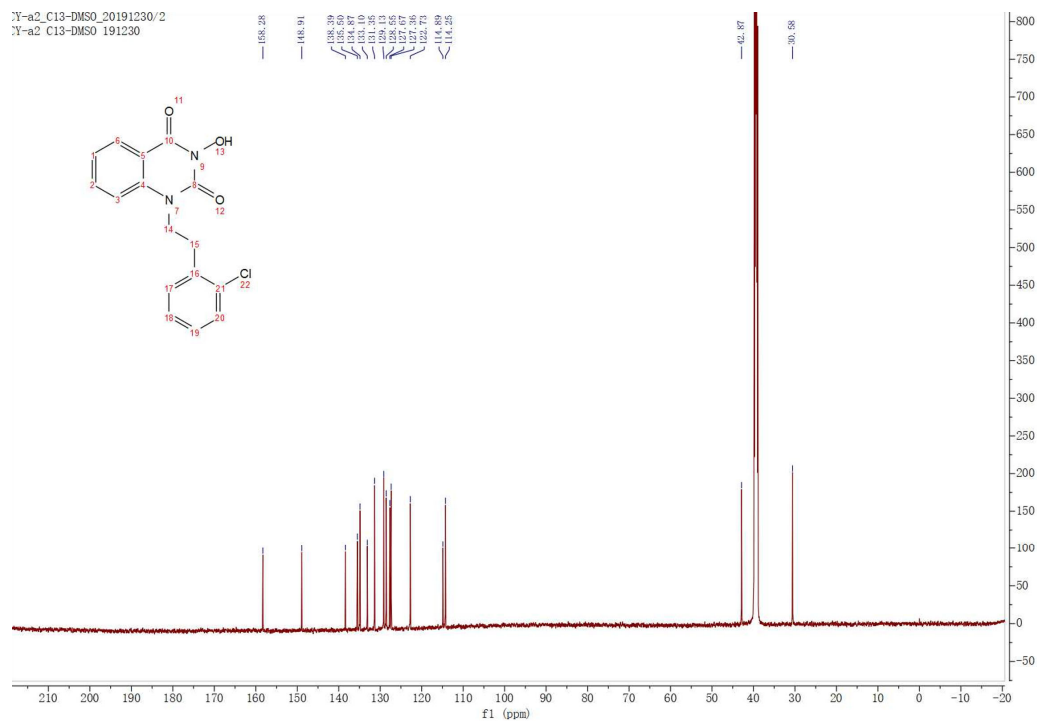

**Figure S10.**  $^{13}\text{C}$  NMR (151 MHz,  $\text{DMSO}-d_6$ ) spectrum of **10c**



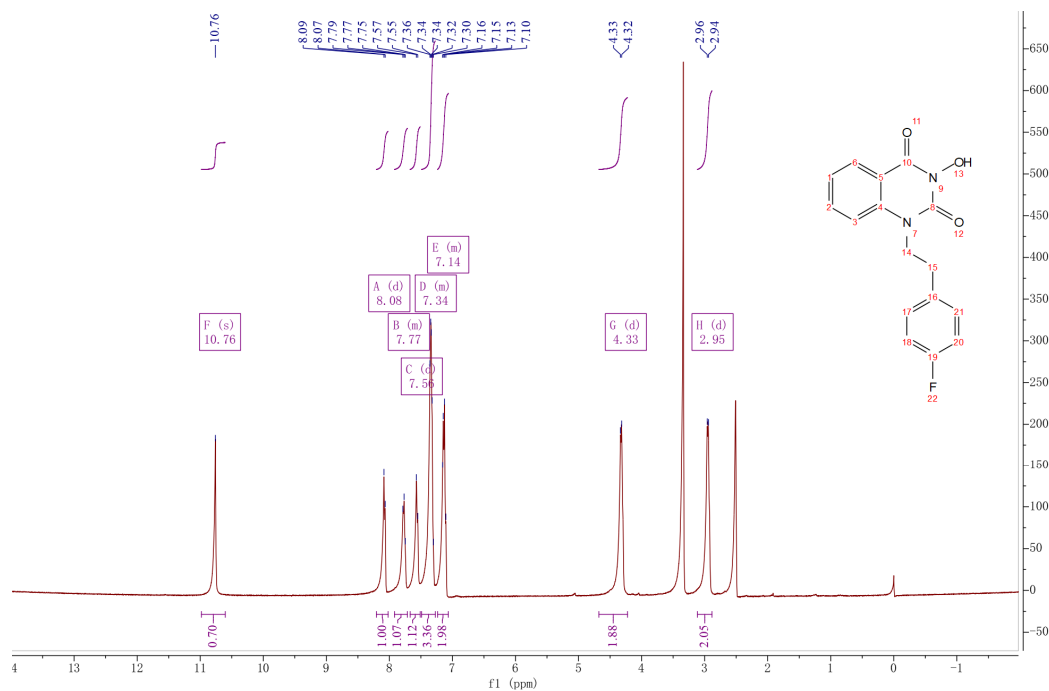

**Figure S11.**  $^1\text{H}$  NMR (400 MHz,  $\text{DMSO}-d_6$ ) spectrum of **10d**

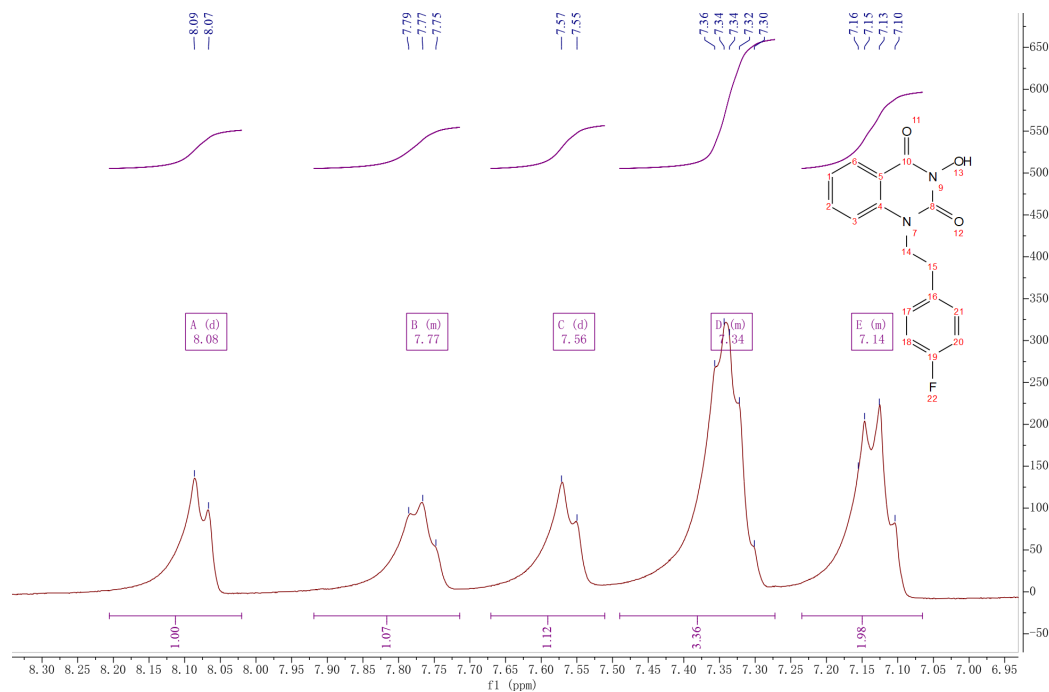

**Figure S12.** Magnified  $^1\text{H}$  NMR (400 MHz,  $\text{DMSO}-d_6$ ) spectrum fragments of **10d**

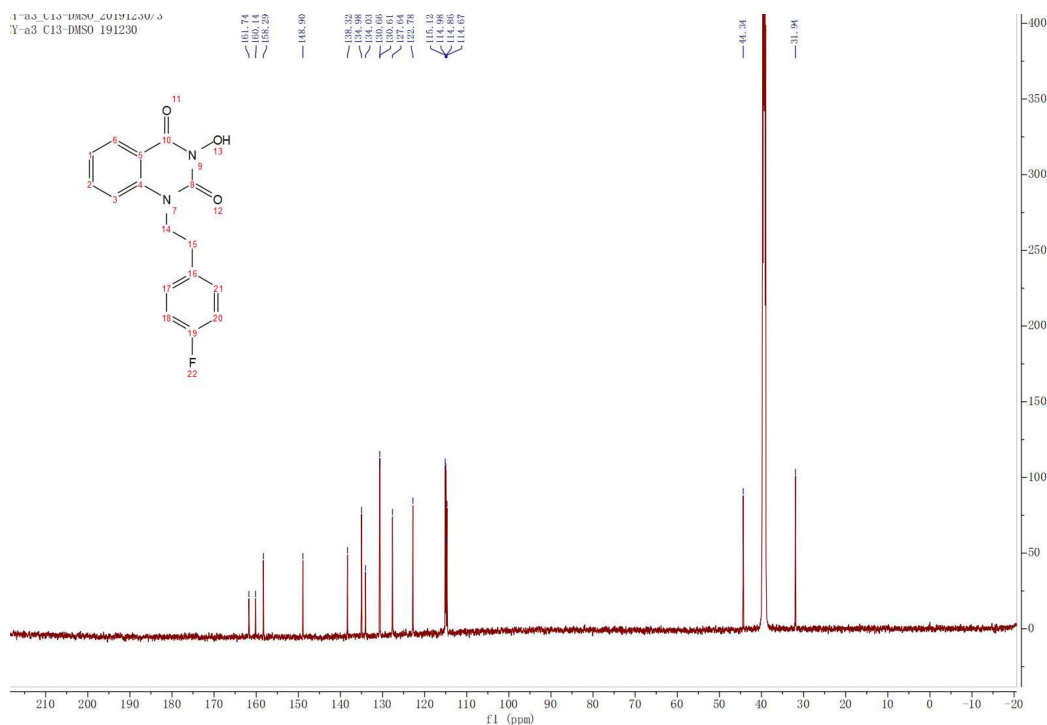

**Figure S13.** <sup>13</sup>C NMR (151 MHz, DMSO-*d*<sub>6</sub>) spectrum of **10d**

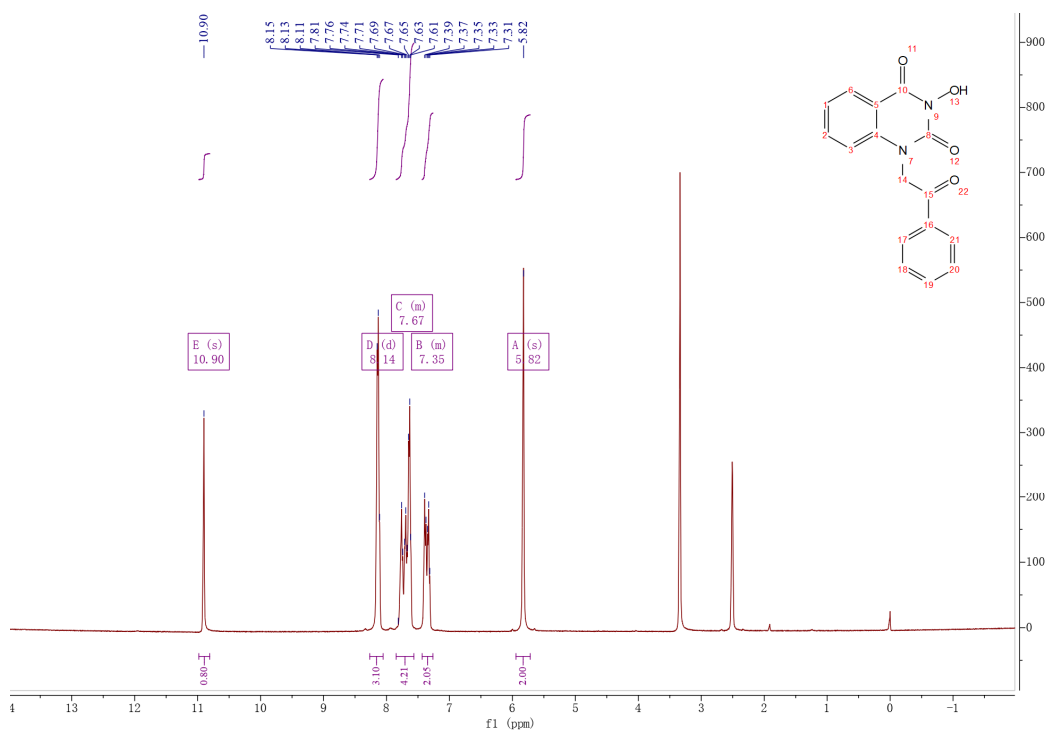

**Figure S14.** <sup>1</sup>H NMR (400 MHz, DMSO-*d*<sub>6</sub>) spectrum of **10e**

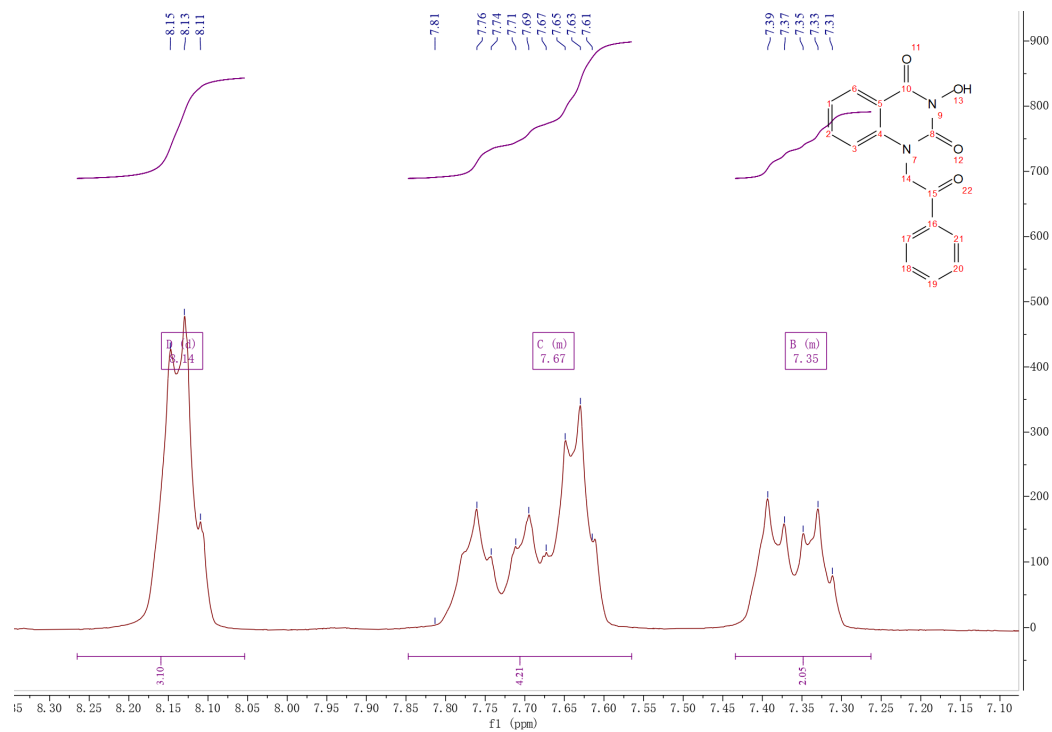

**Figure S15.** Magnified  $^1\text{H}$  NMR (400 MHz,  $\text{DMSO}-d_6$ ) spectrum fragments of **10e**

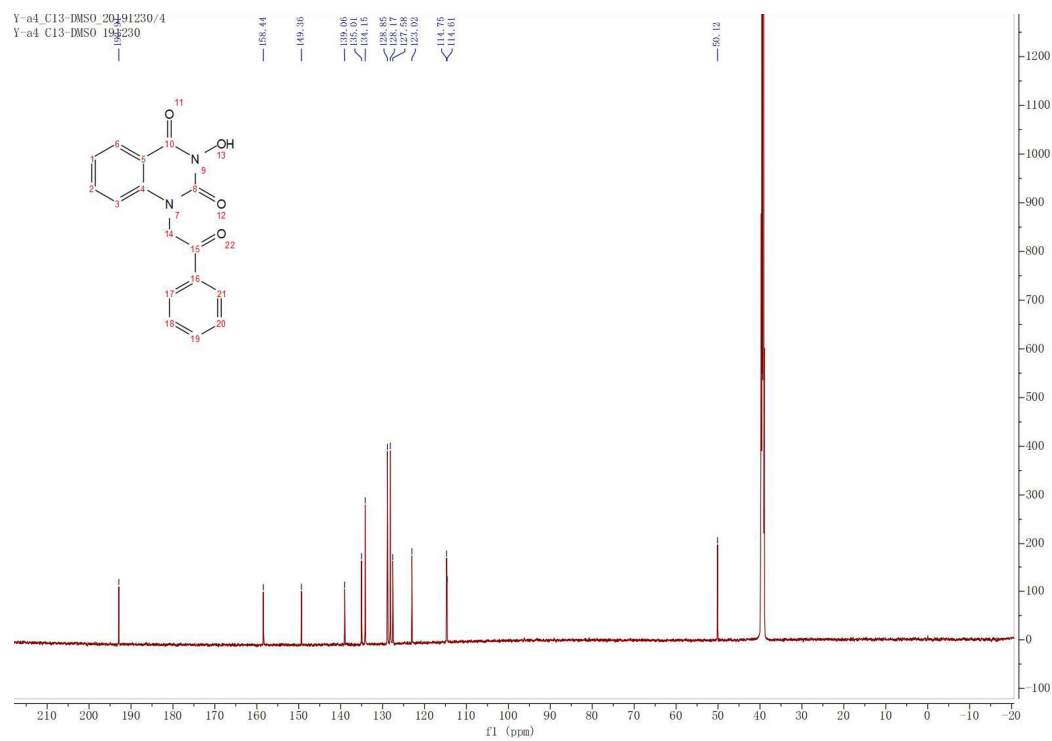

**Figure S16.**  $^{13}\text{C}$  NMR (151 MHz,  $\text{DMSO}-d_6$ ) spectrum of **10e**

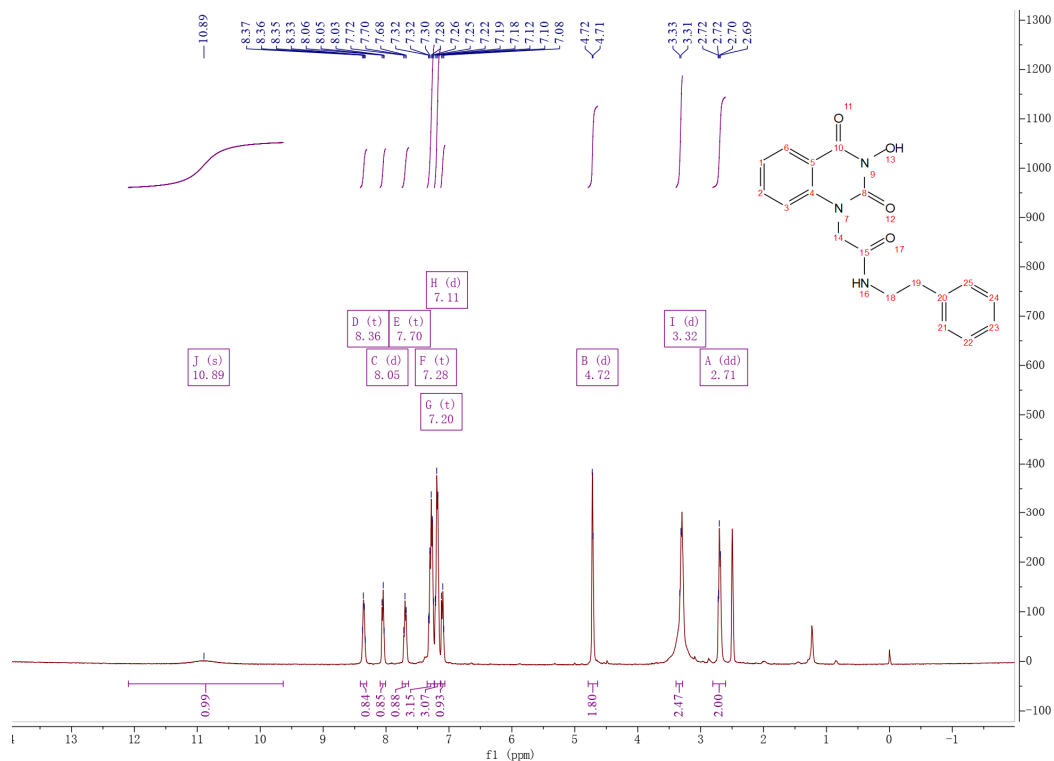

Figure S17.  $^1\text{H}$  NMR (400 MHz,  $\text{DMSO}-d_6$ ) spectrum of **10f**

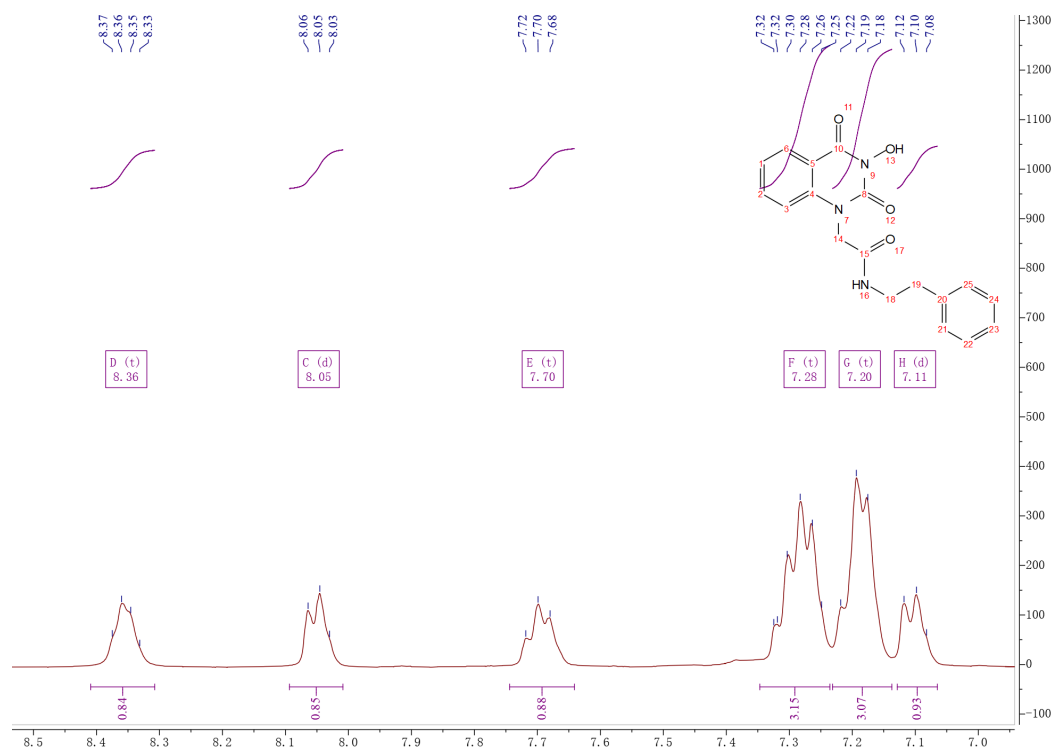

Figure S18. Magnified  $^1\text{H}$  NMR (400 MHz,  $\text{DMSO}-d_6$ ) spectrum fragments of **10f**

Chemical structure of compound 10 is shown in the top left. The <sup>1</sup>H NMR spectrum (DMSO-d<sub>6</sub>) is displayed below, with peaks labeled A through J and their corresponding chemical shifts and integrations.

| Label | Chemical Shift (ppm) | Multiplicity | Integration |
|-------|----------------------|--------------|-------------|
| A     | 8.33                 | s            | 1.00        |
| B     | 8.00                 | d            | 1.04        |
| C     | 7.69                 | s            | 1.08        |
| D     | 7.26                 | d            | 1.18        |
| E     | 4.73                 | s            | 1.14        |
| F     | 2.97                 | s            | 2.37        |
| G     | 2.50                 | s            | 1.73        |
| H     | 0.88                 | s            | 1.07        |
| I     | 0.38                 | d            | 2.00        |
| J     | 0.13                 | s            | 2.03        |

**Figure S20.**  $^1\text{H}$  NMR (400 MHz,  $\text{DMSO}-d_6$ ) spectrum of **10g**

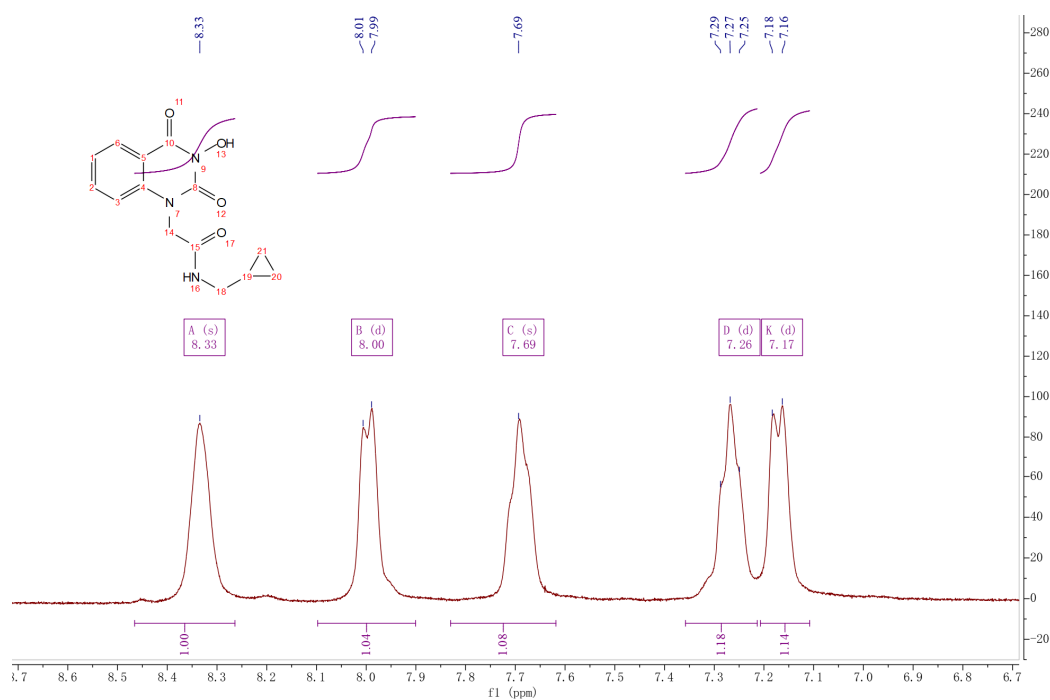

**Figure S21.** Magnified  $^1\text{H}$  NMR (400 MHz,  $\text{DMSO}-d_6$ ) spectrum fragments of **10g**

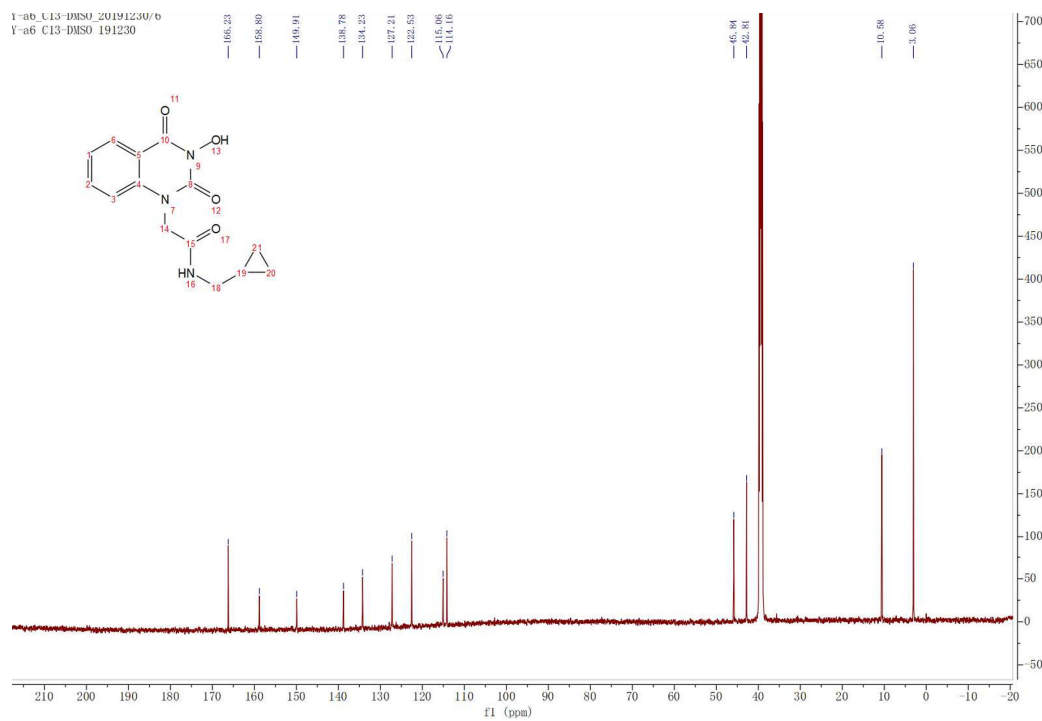

**Figure S22.**  $^{13}\text{C}$  NMR (151 MHz,  $\text{DMSO}-d_6$ ) spectrum of **10g**

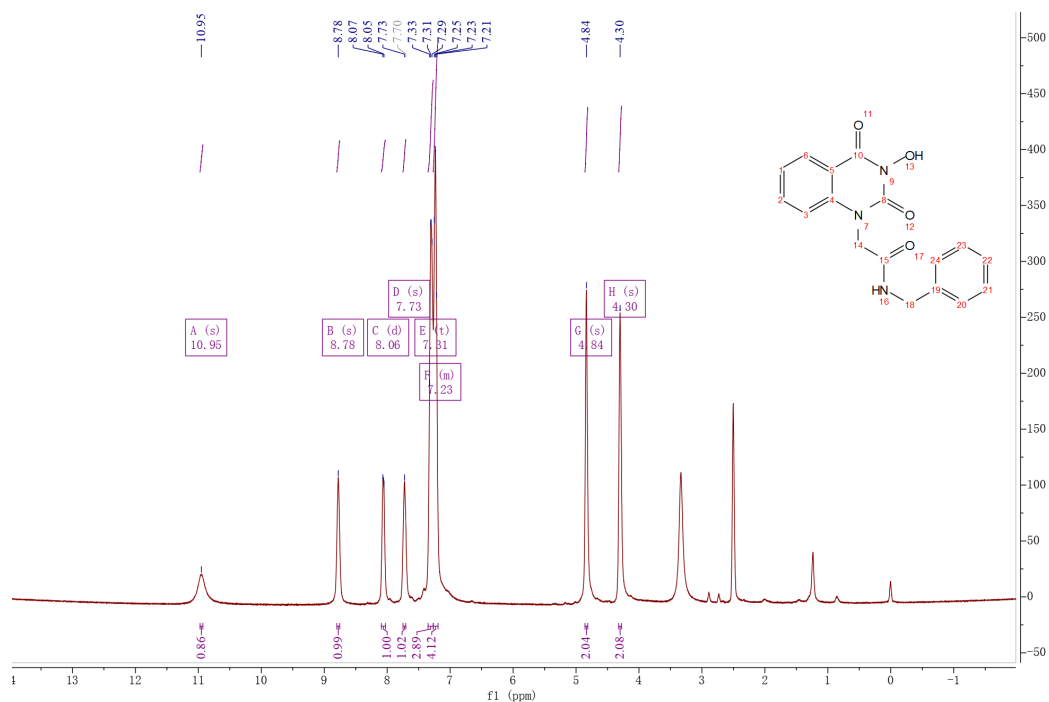

**Figure S23.**  $^1\text{H}$  NMR (400 MHz,  $\text{DMSO}-d_6$ ) spectrum of **10h**

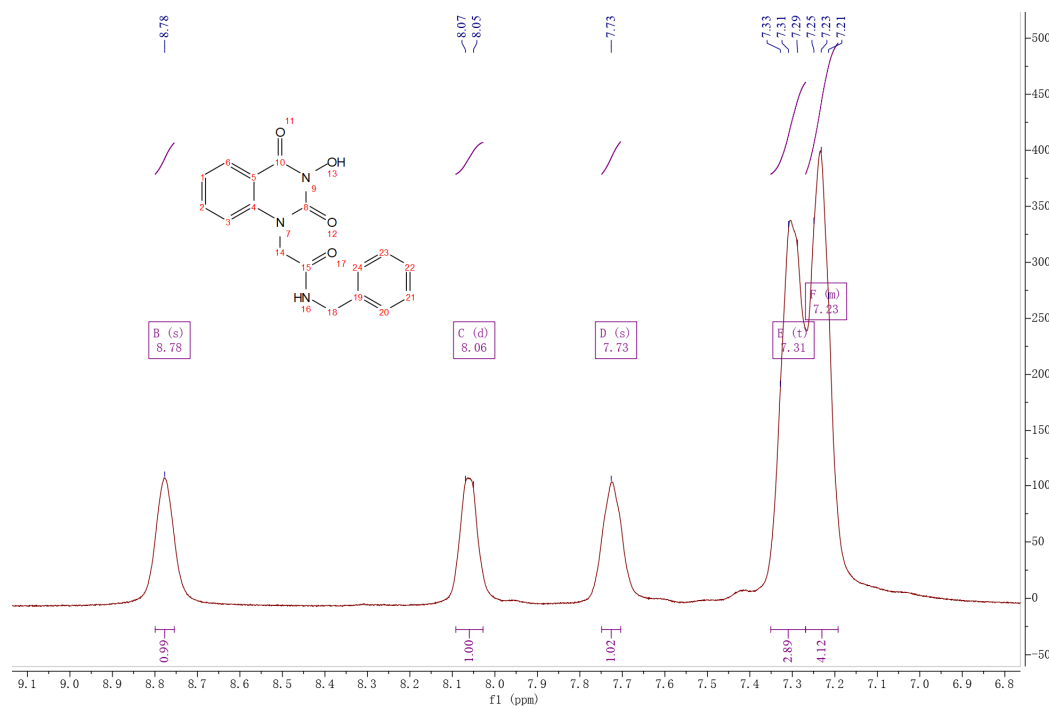

**Figure S24.** Magnified  $^1\text{H}$  NMR (400 MHz,  $\text{DMSO}-d_6$ ) spectrum fragments of **10h**

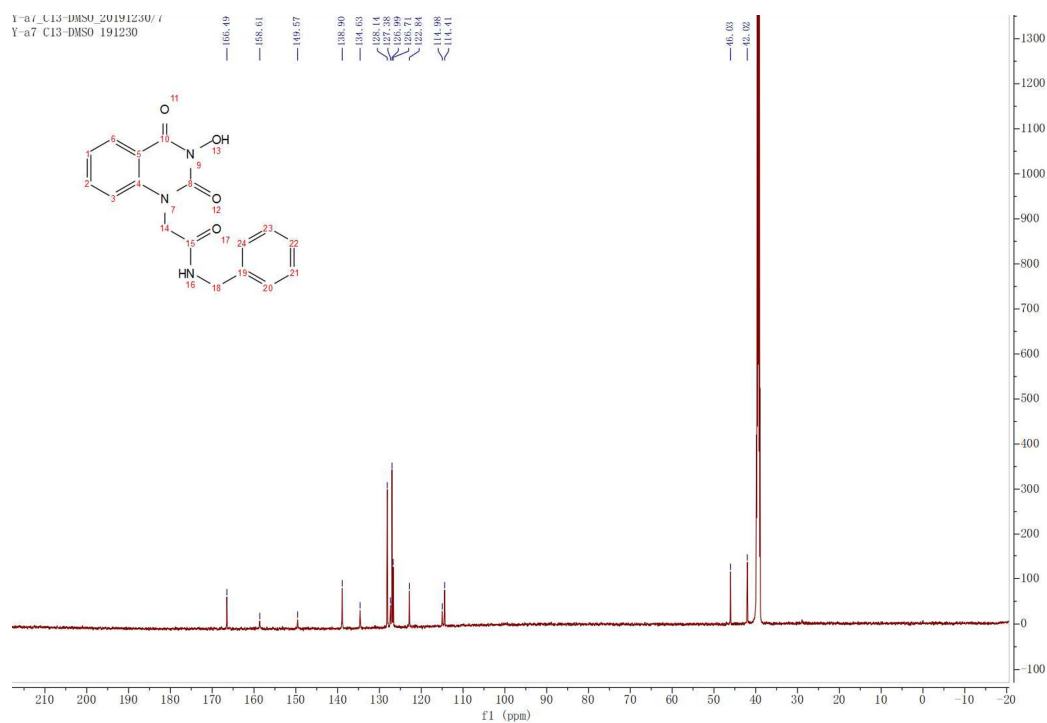

**Figure S25.**  $^{13}\text{C}$  NMR (151 MHz,  $\text{DMSO}-d_6$ ) spectrum of **10h**

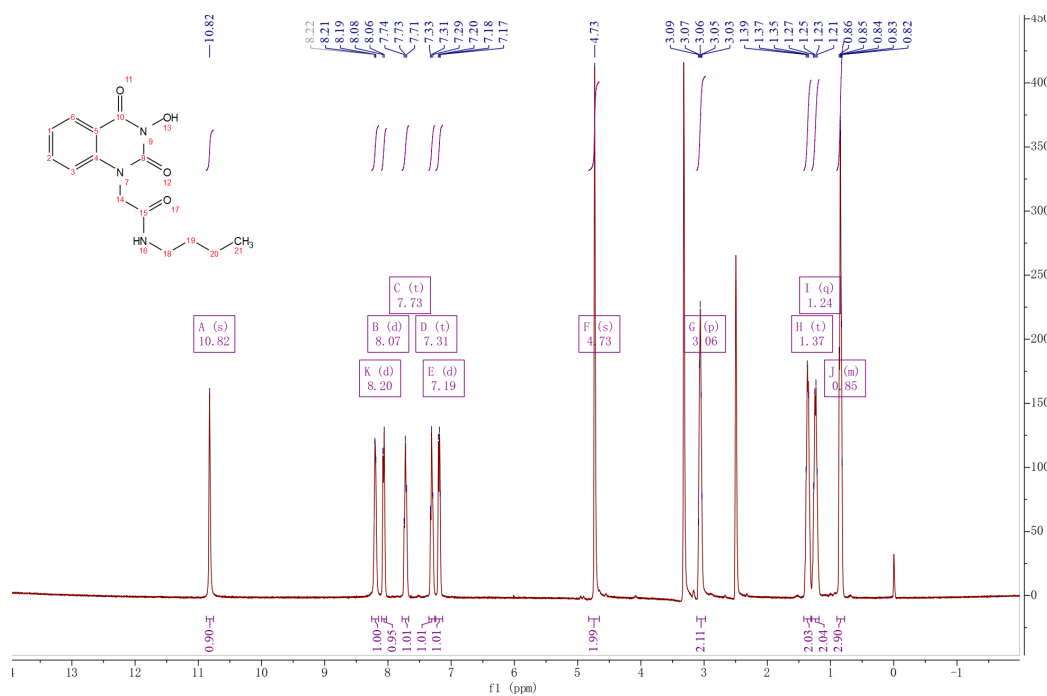

**Figure S26.**  $^1\text{H}$  NMR (400 MHz,  $\text{DMSO}-d_6$ ) spectrum of **10i**



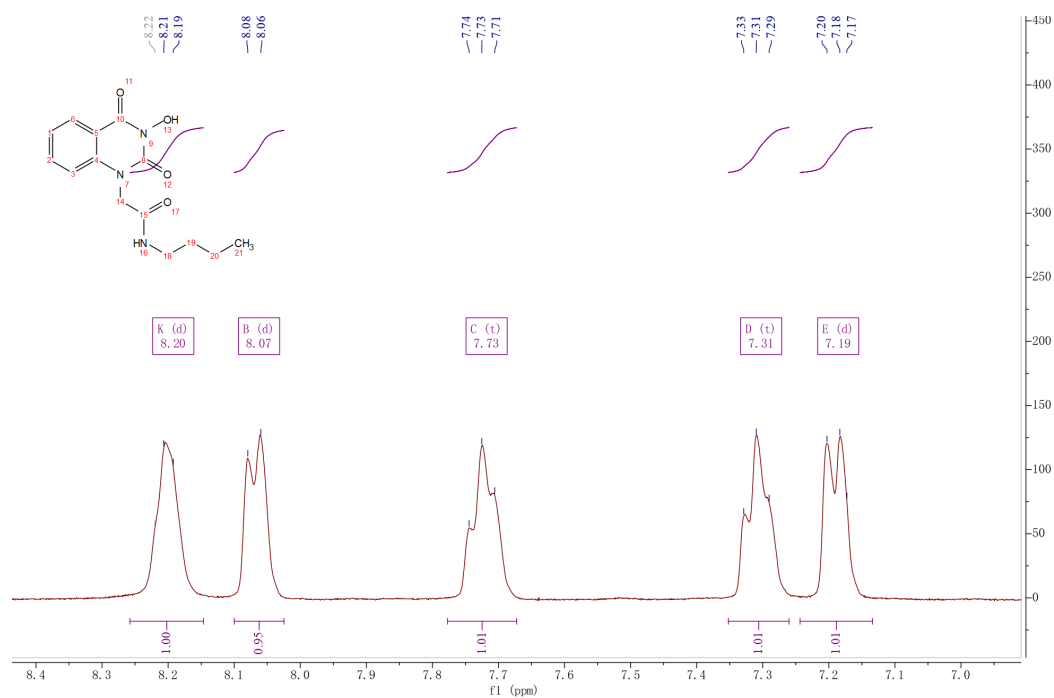

**Figure S27.** Magnified  $^1\text{H}$  NMR (400 MHz,  $\text{DMSO}-d_6$ ) spectrum fragments of **10i**

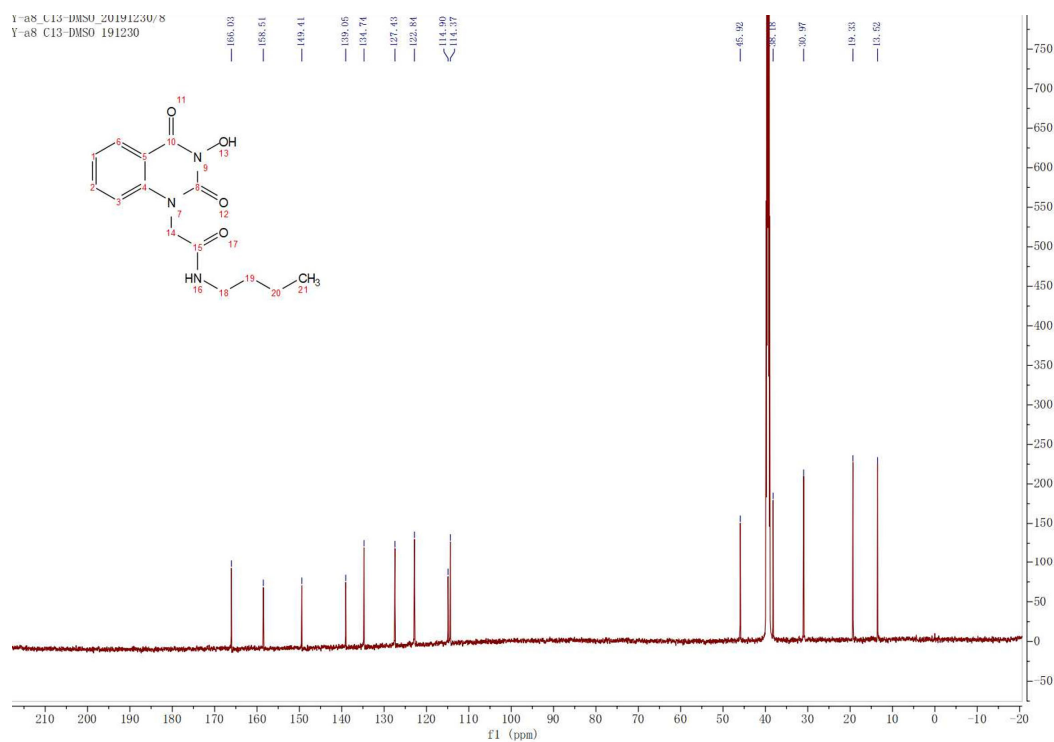

**Figure S28.**  $^{13}\text{C}$  NMR (151 MHz,  $\text{DMSO}-d_6$ ) spectrum of **10i**

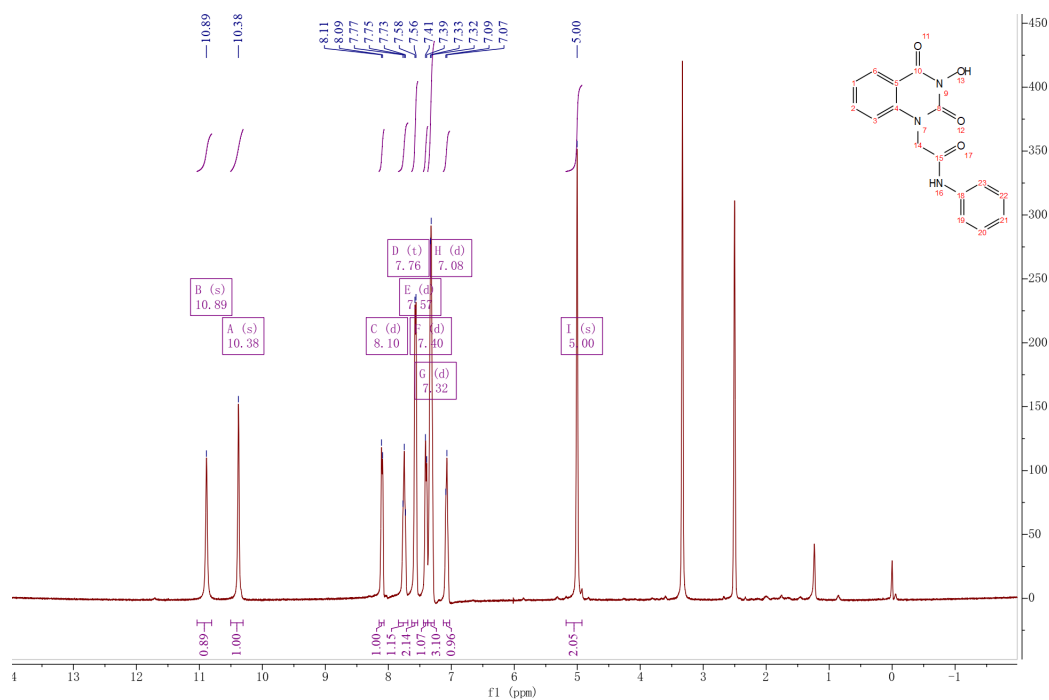

**Figure S29.**  $^1\text{H}$  NMR (400 MHz,  $\text{DMSO}-d_6$ ) spectrum of **10j**

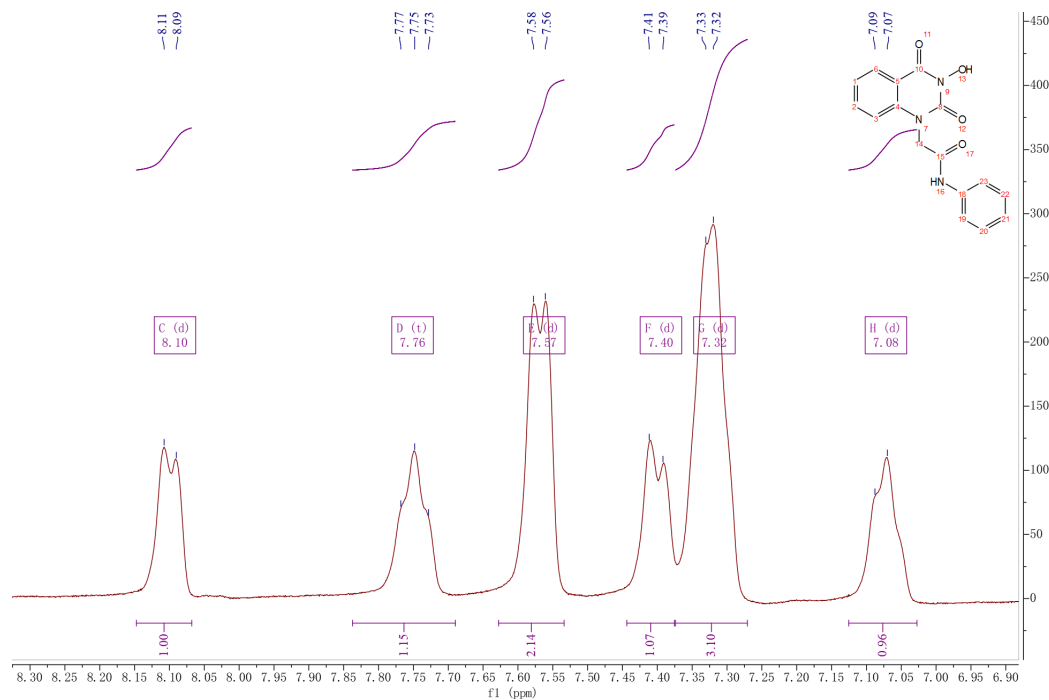

**Figure S30.** Magnified  $^1\text{H}$  NMR (400 MHz,  $\text{DMSO}-d_6$ ) spectrum fragments of **10j**

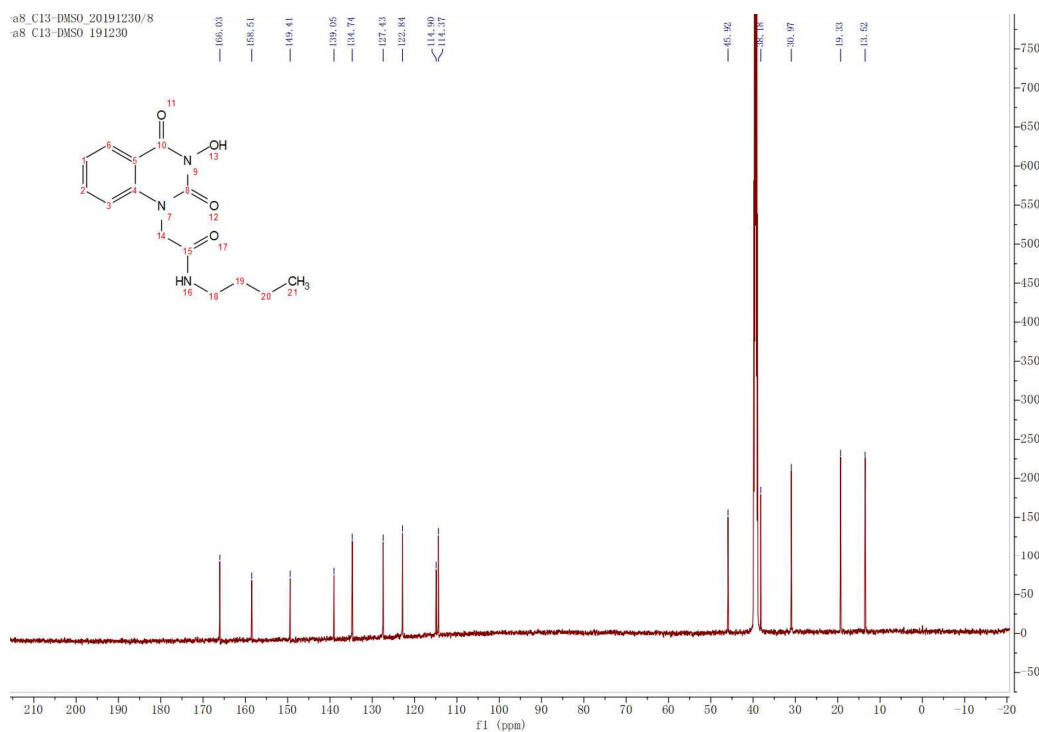

**Figure S31.**  $^{13}\text{C}$  NMR (151 MHz,  $\text{DMSO}-d_6$ ) spectrum of **10j**

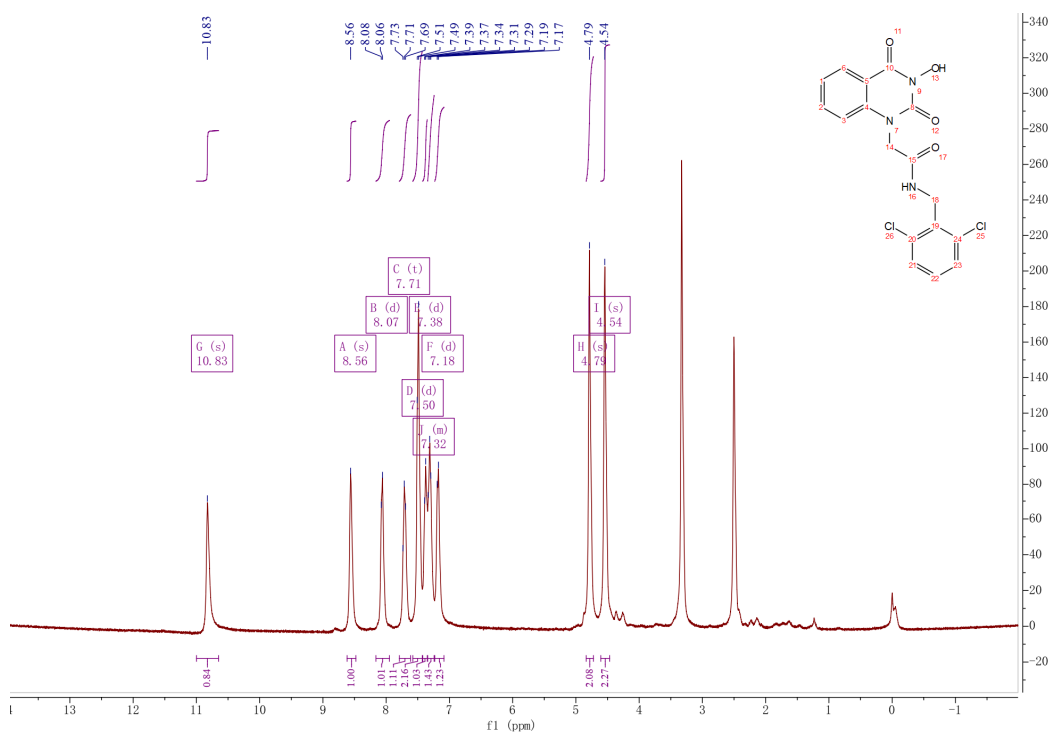

**Figure S32.**  $^1\text{H}$  NMR (400 MHz,  $\text{DMSO}-d_6$ ) spectrum of **10k**

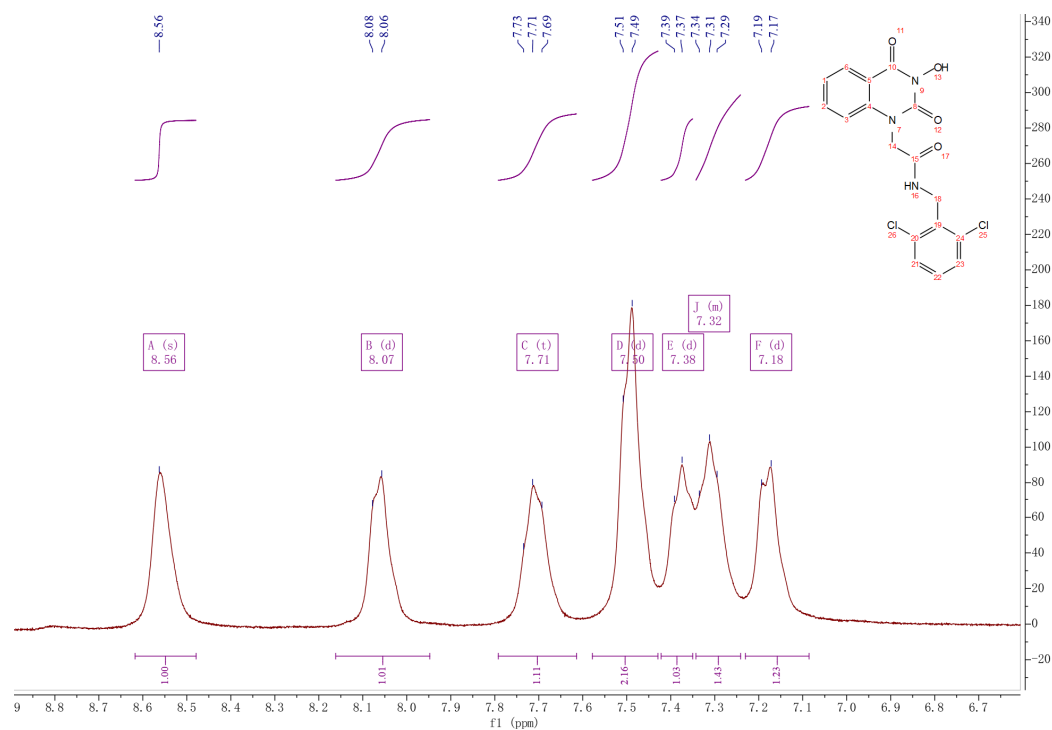

**Figure S33.** Magnified  $^1\text{H}$  NMR (400 MHz,  $\text{DMSO}-d_6$ ) spectrum fragments of **10k**

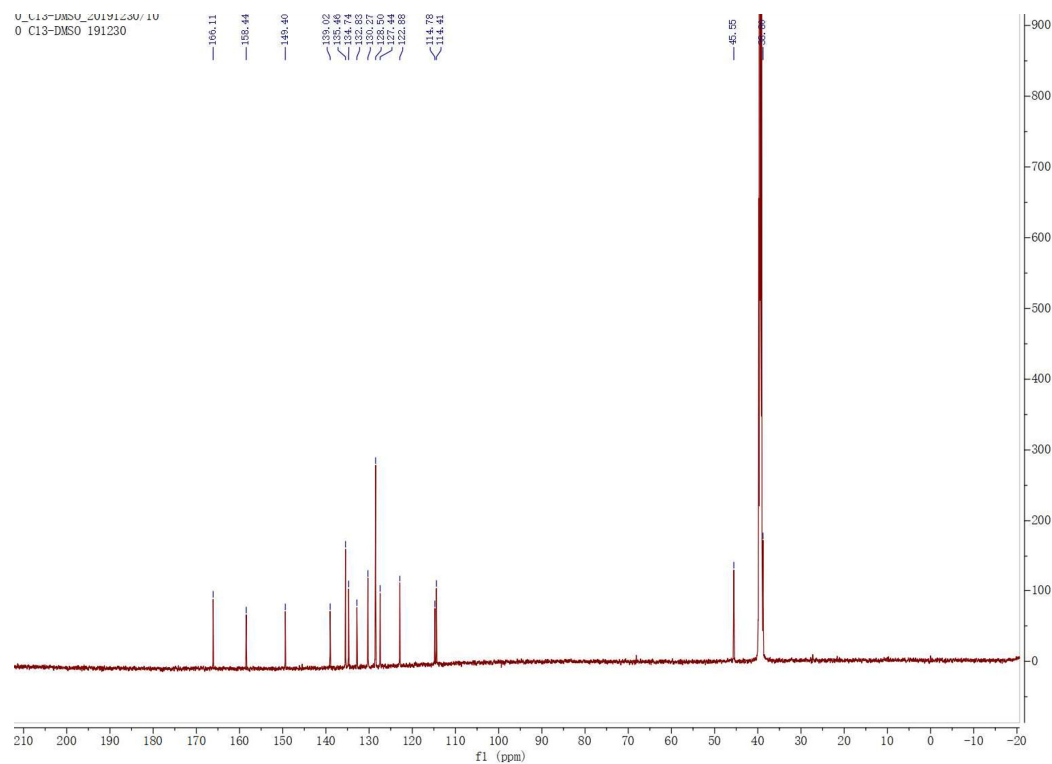

**Figure S34.**  $^{13}\text{C}$  NMR (151 MHz,  $\text{DMSO}-d_6$ ) spectrum of **10k**

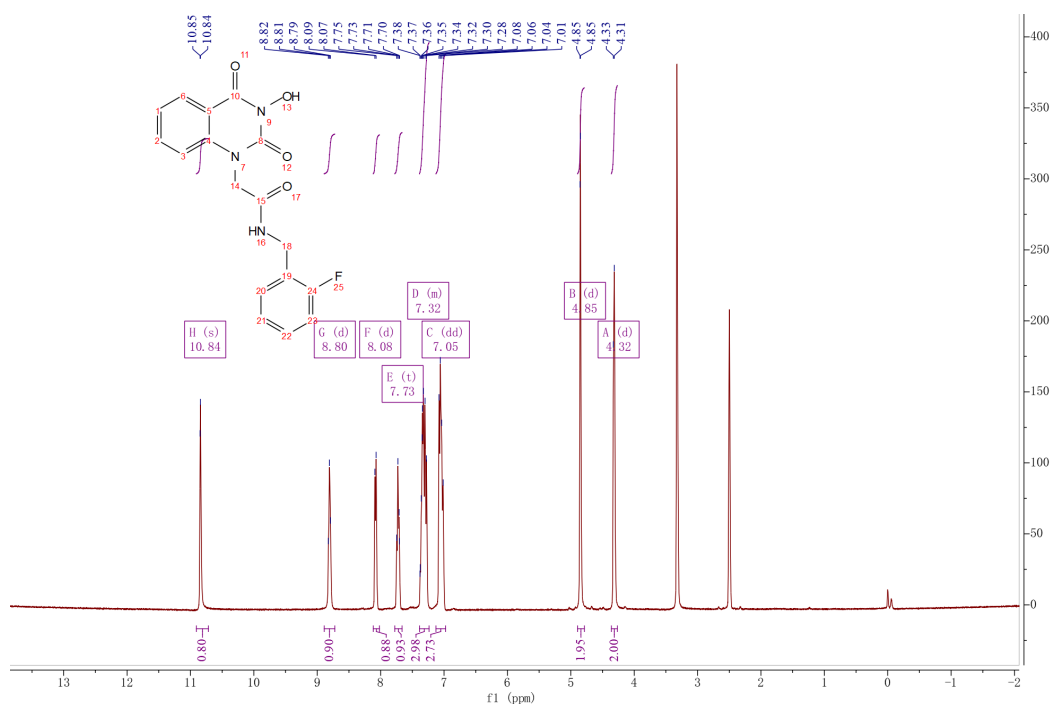

**Figure S35.**  $^1\text{H}$  NMR (400 MHz,  $\text{DMSO}-d_6$ ) spectrum of **101**

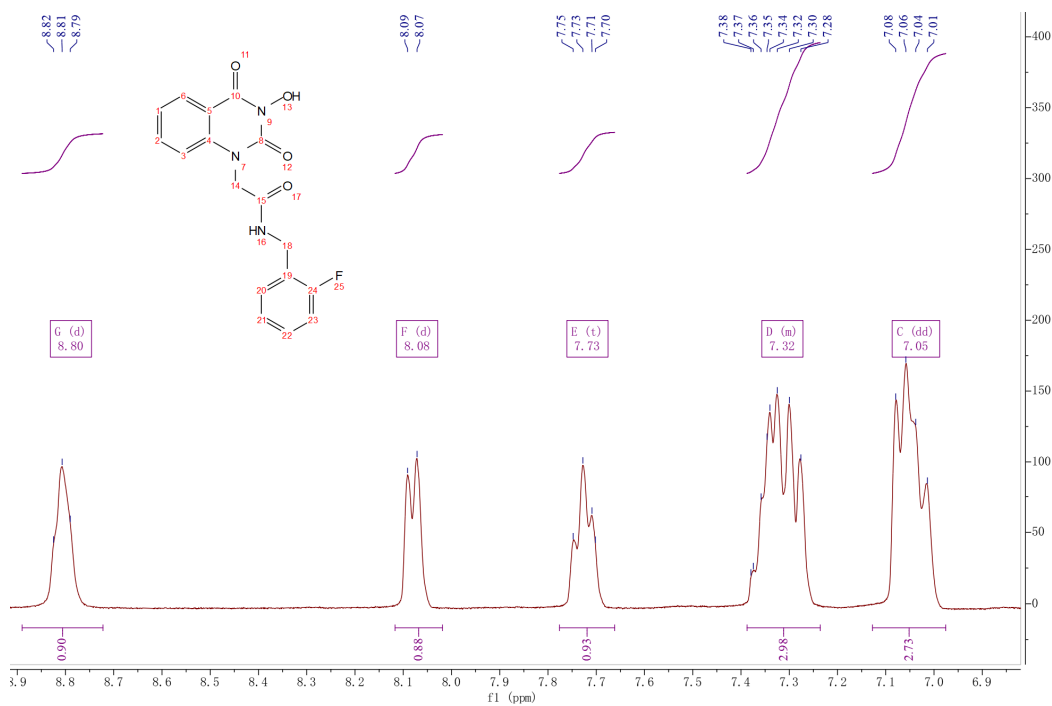

**Figure S36.** Magnified  $^1\text{H}$  NMR (400 MHz,  $\text{DMSO}-d_6$ ) spectrum fragments of **101**

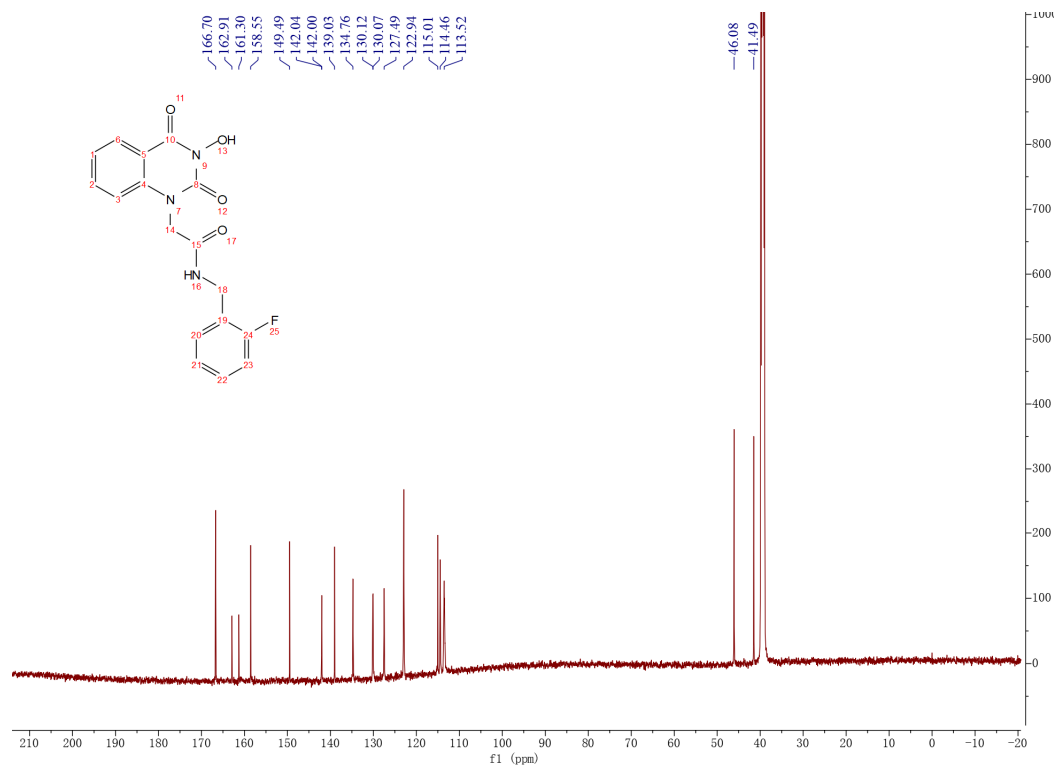Figure S37.  $^{13}\text{C}$  NMR (151 MHz, DMSO- $d_6$ ) spectrum of 10l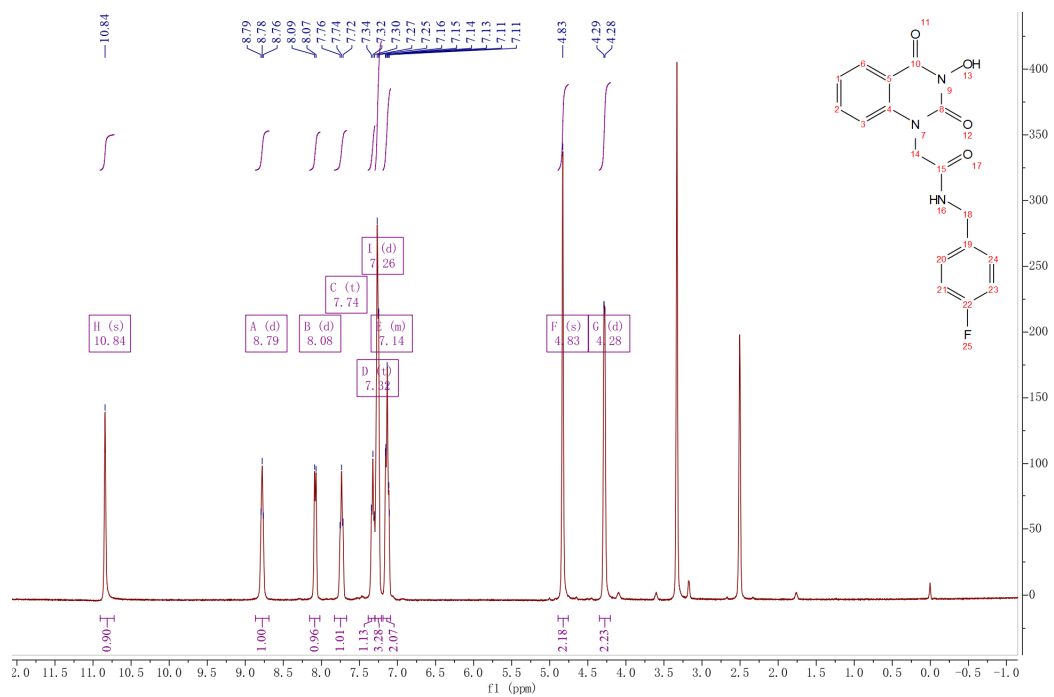Figure S38.  $^1\text{H}$  NMR (400 MHz, DMSO- $d_6$ ) spectrum of 10m

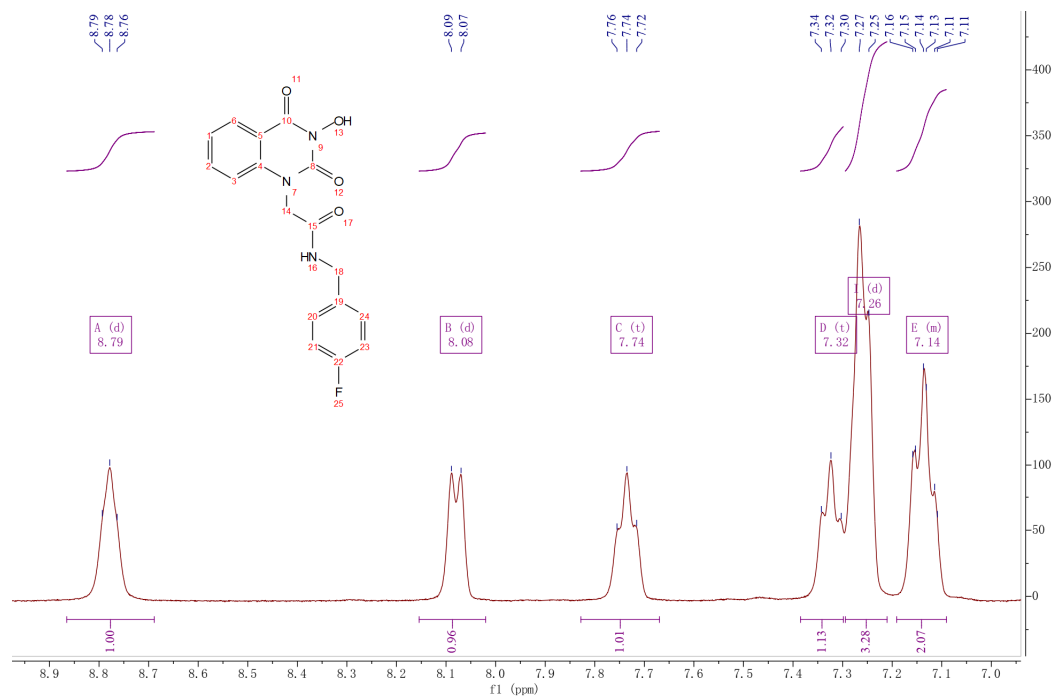

**Figure S39.** Magnified  $^1\text{H}$  NMR (400 MHz,  $\text{DMSO}-d_6$ ) spectrum fragments of **10m**

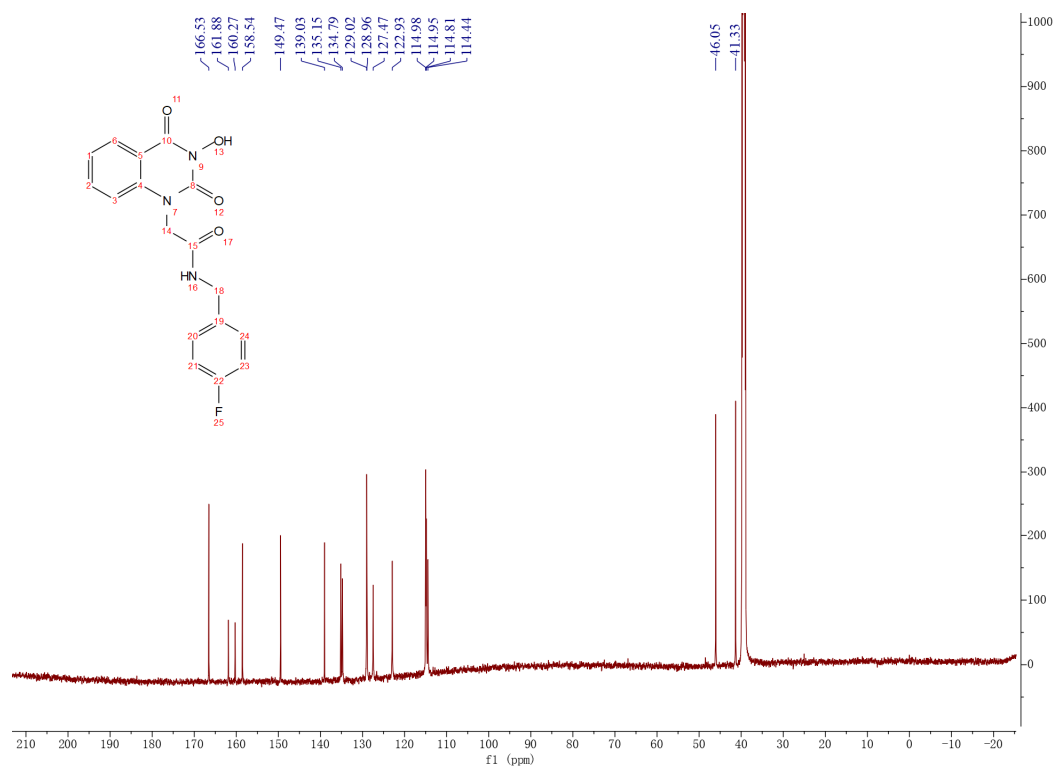

**Figure S40.**  $^{13}\text{C}$  NMR (151 MHz,  $\text{DMSO}-d_6$ ) spectrum of **10m**

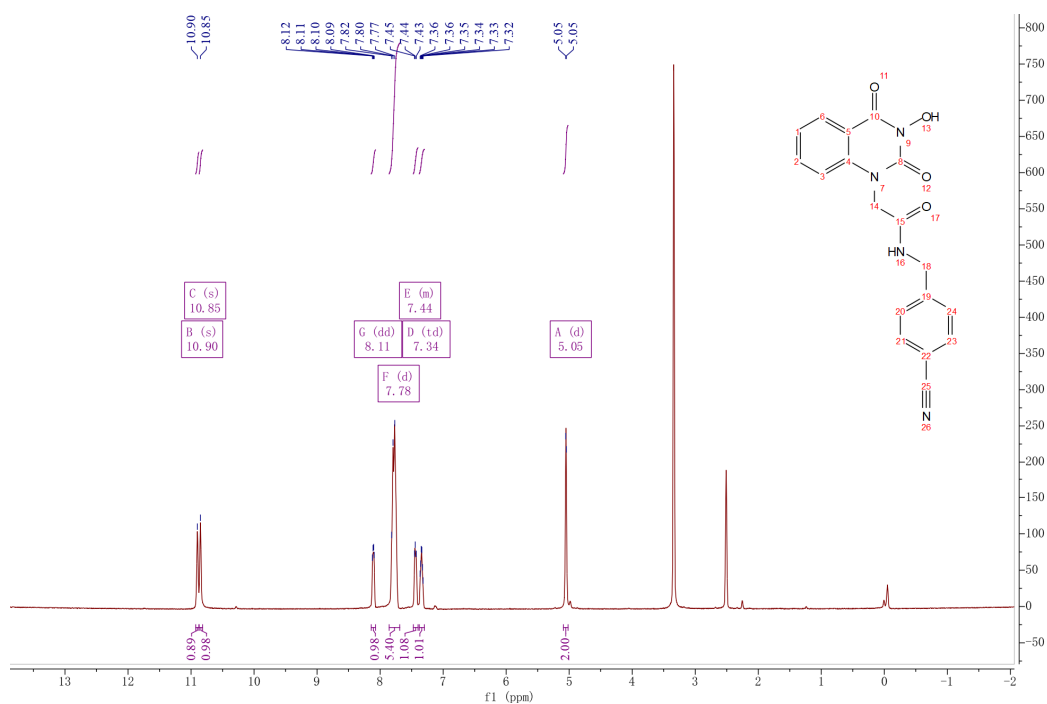

**Figure S41.**  $^1\text{H}$  NMR (400 MHz,  $\text{DMSO}-d_6$ ) spectrum of **10n**

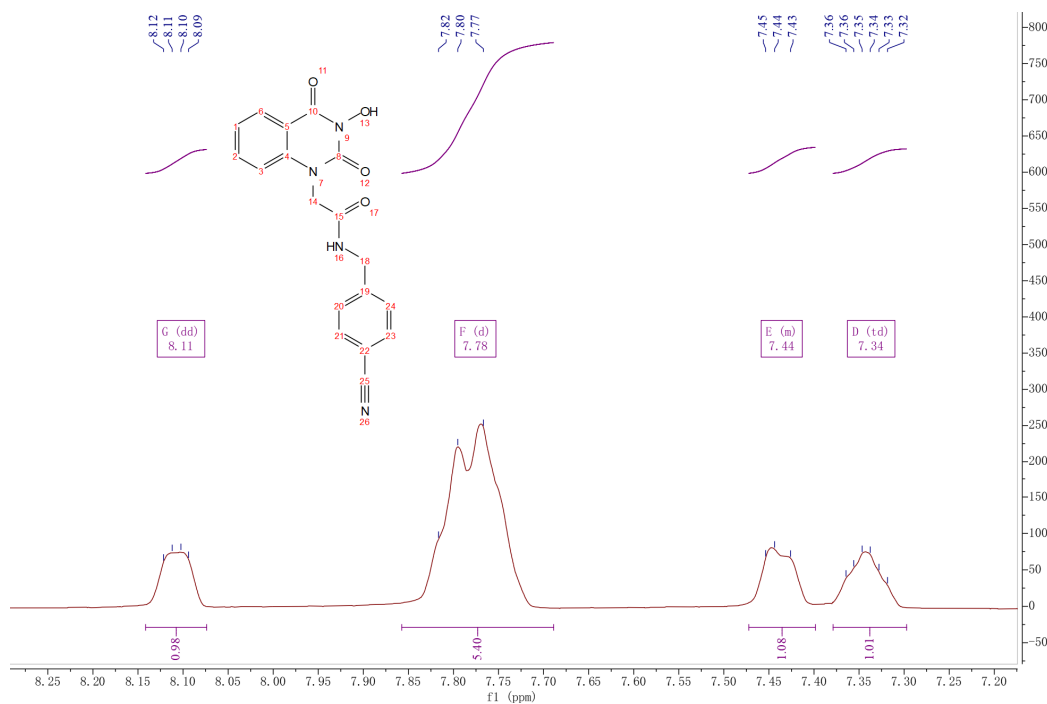

**Figure S42.** Magnified  $^1\text{H}$  NMR (400 MHz,  $\text{DMSO}-d_6$ ) spectrum fragments of **10n**



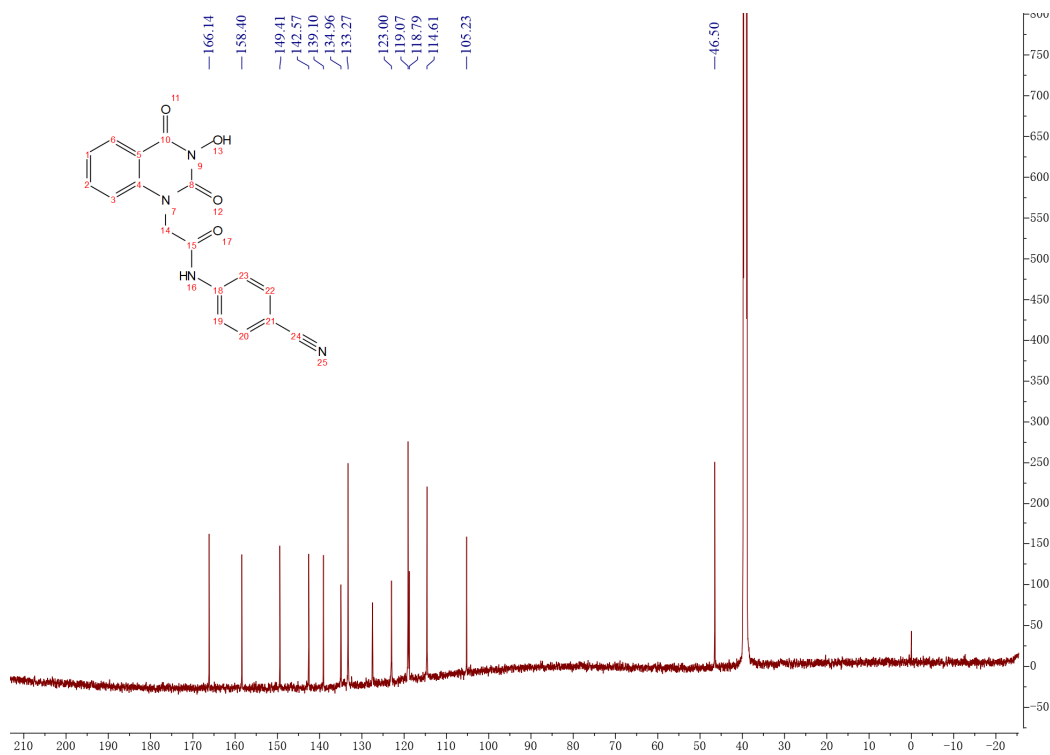

**Figure S43.**  $^{13}\text{C}$  NMR (151 MHz,  $\text{DMSO}-d_6$ ) spectrum of **10n**

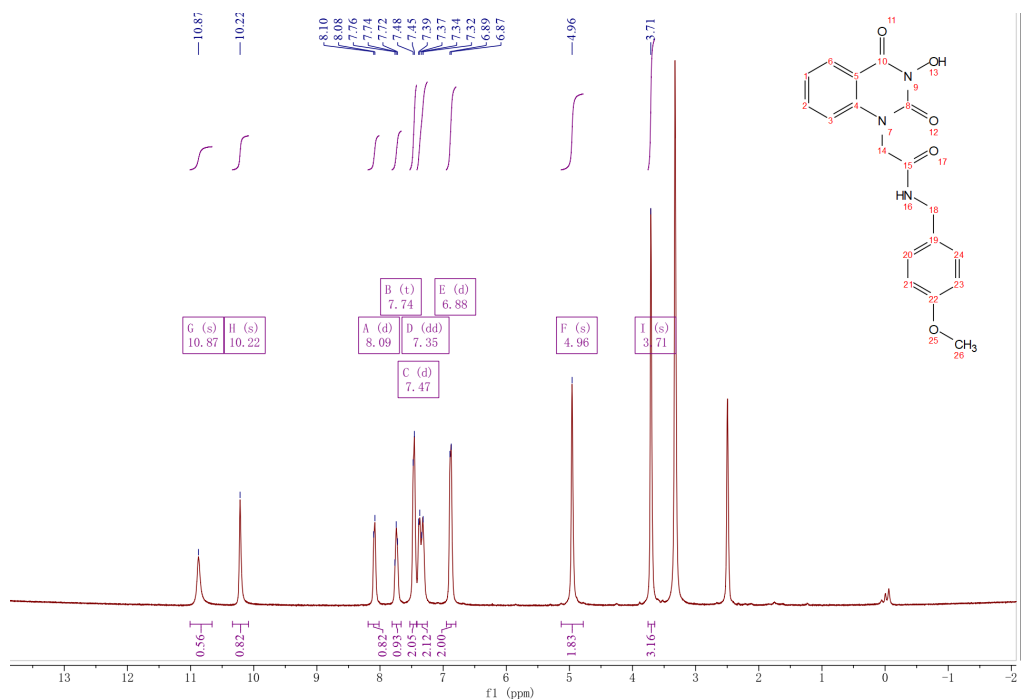

**Figure S44.**  $^1\text{H}$  NMR (400 MHz,  $\text{DMSO}-d_6$ ) spectrum of **10o**

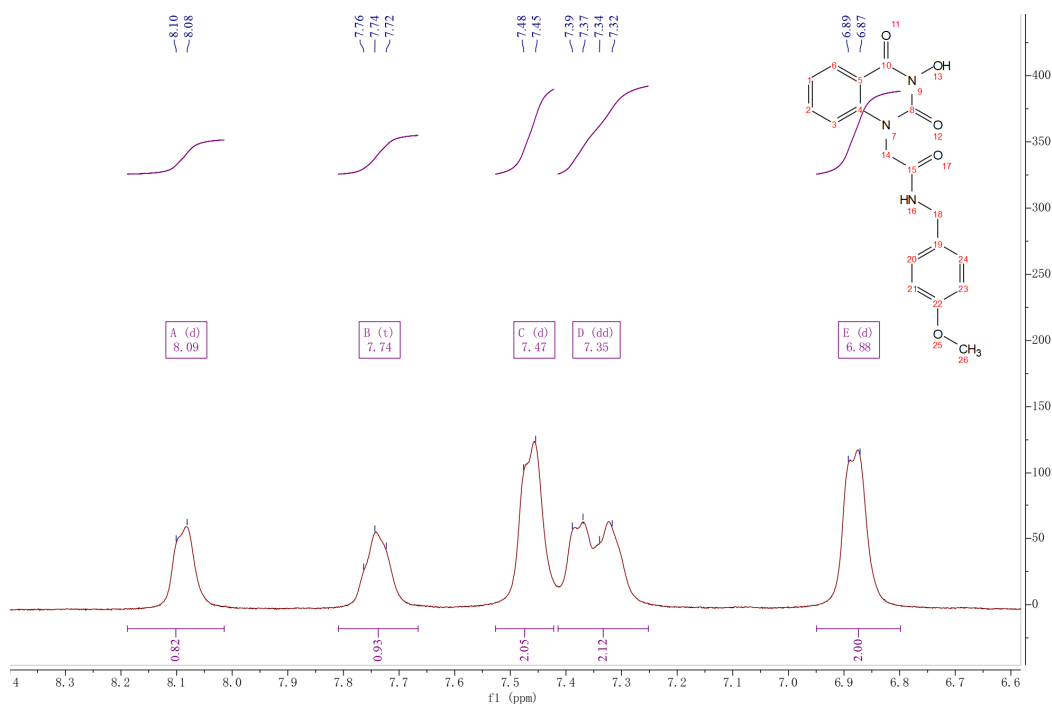

**Figure S45.** Magnified  $^1\text{H}$  NMR (400 MHz,  $\text{DMSO}-d_6$ ) spectrum fragments of **10o**

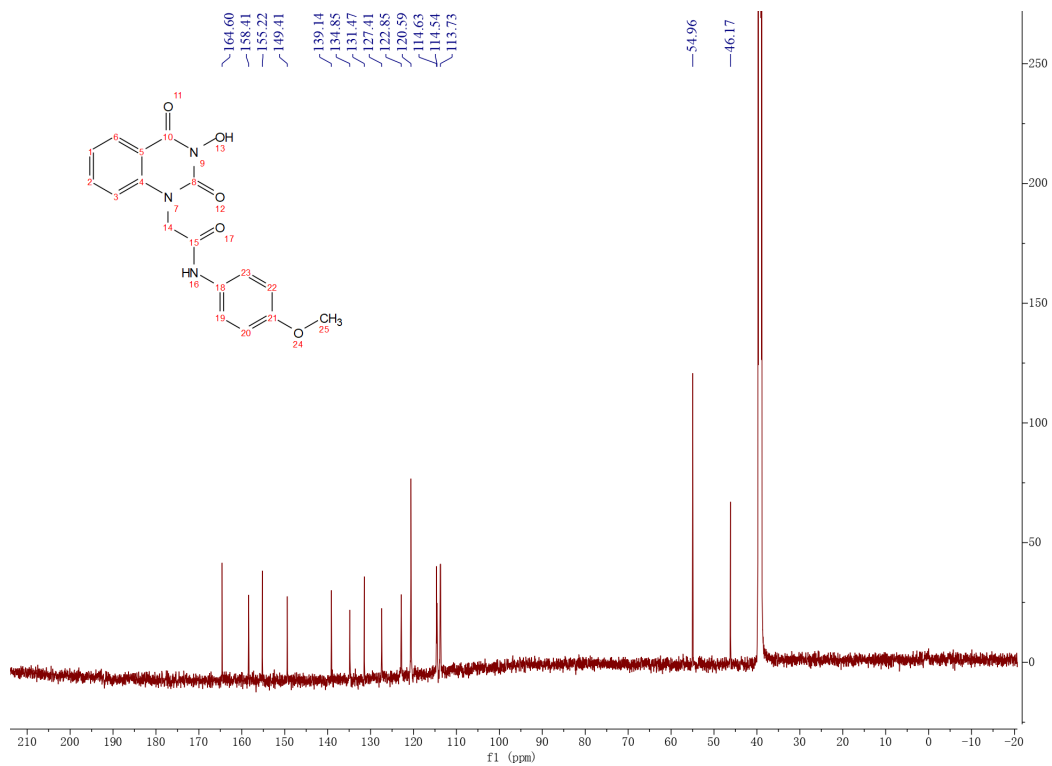

**Figure S46.**  $^{13}\text{C}$  NMR (151 MHz,  $\text{DMSO}-d_6$ ) spectrum of **10o**

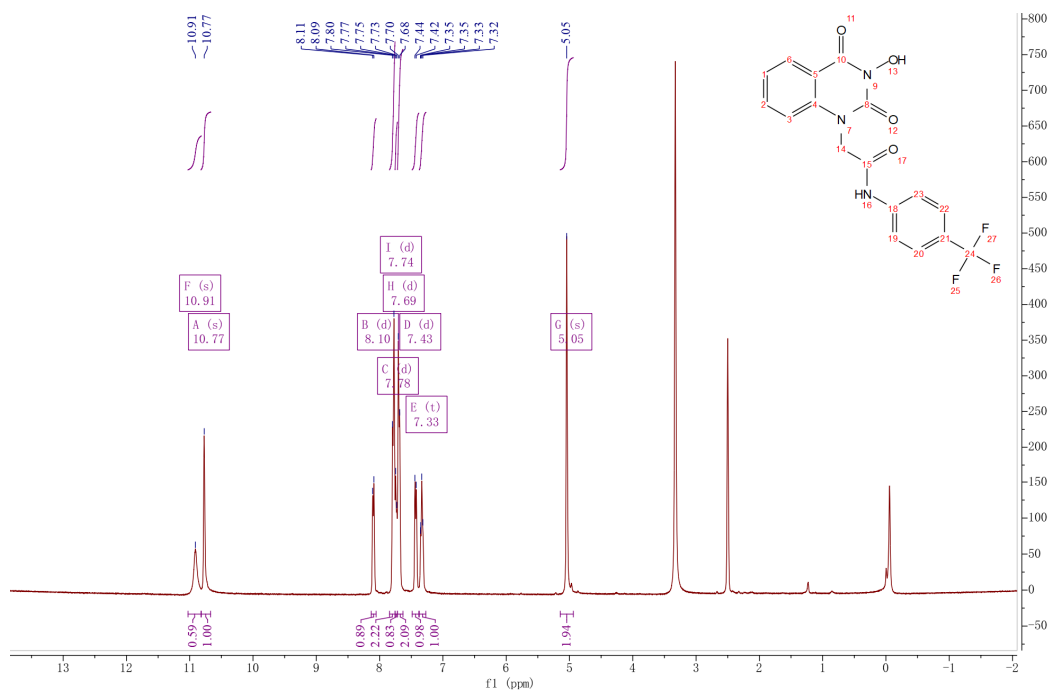

**Figure S47.**  $^1\text{H}$  NMR (400 MHz,  $\text{DMSO}-d_6$ ) spectrum of **10p**

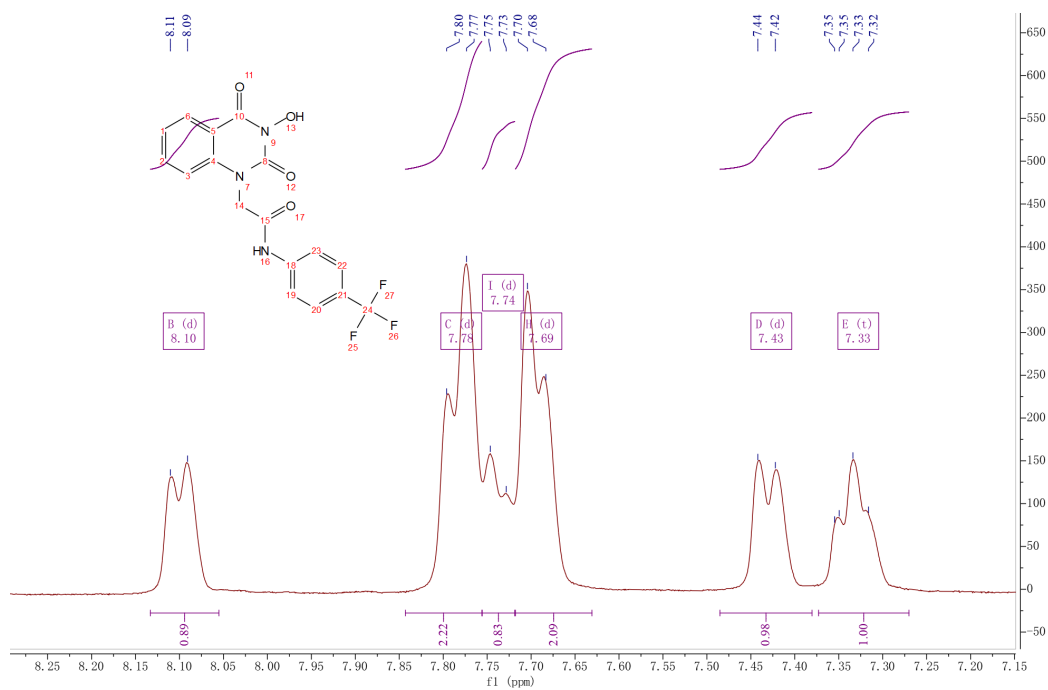

**Figure S48.** Magnified  $^1\text{H}$  NMR (400 MHz,  $\text{DMSO}-d_6$ ) spectrum fragments of **10p**

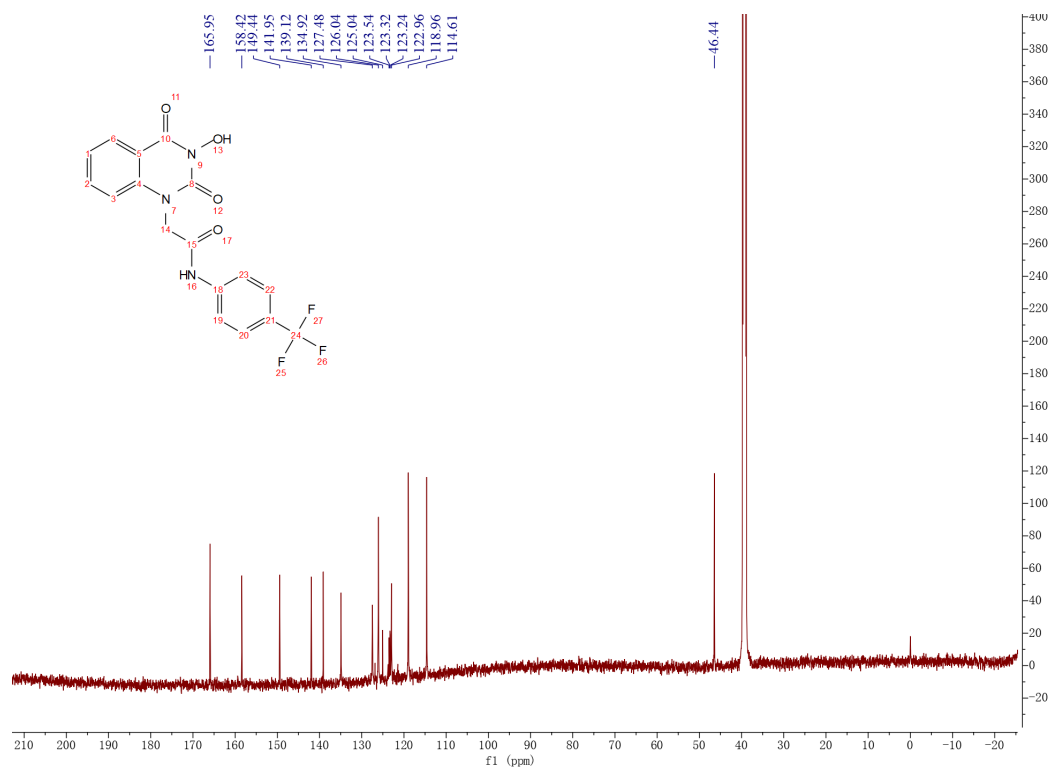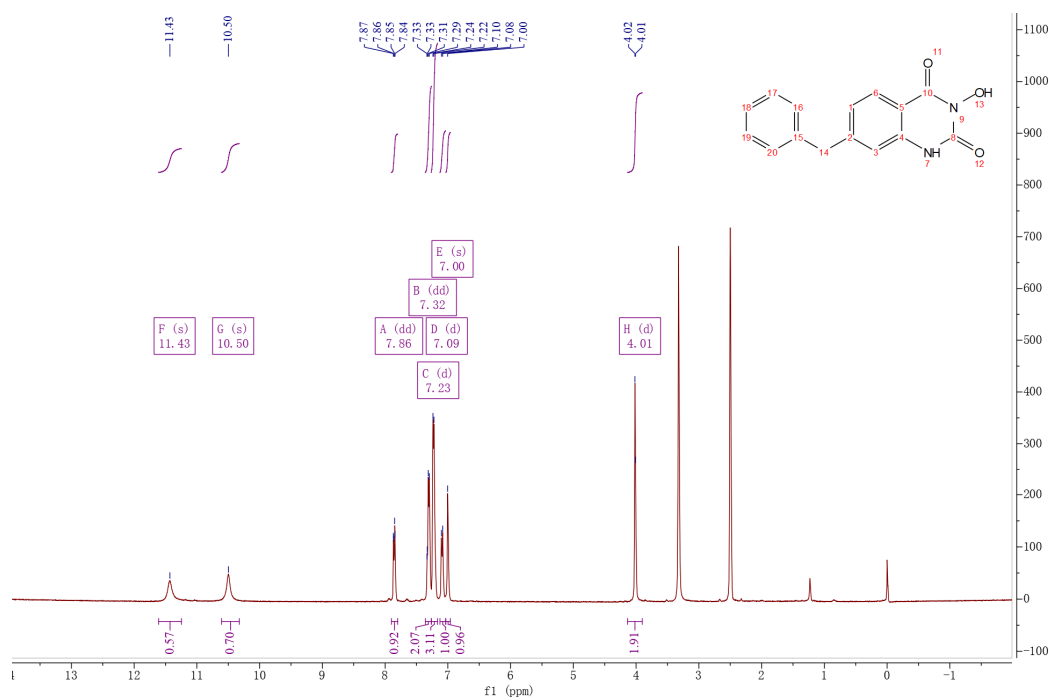

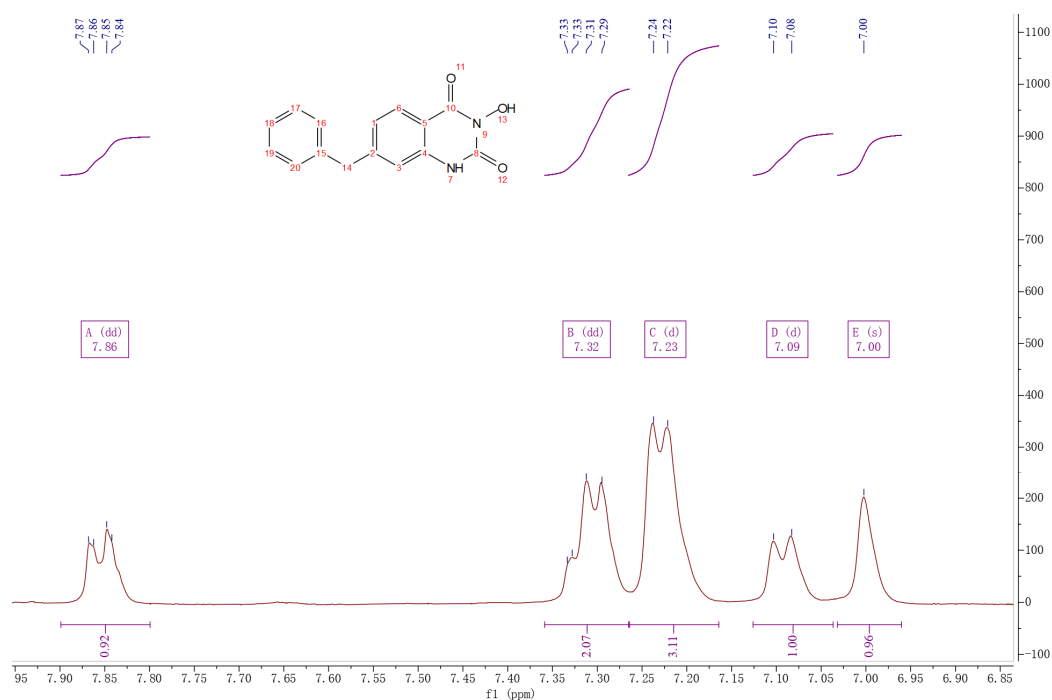

**Figure S51.** Magnified  $^1\text{H}$  NMR (400 MHz,  $\text{DMSO}-d_6$ ) spectrum fragments of **18a**

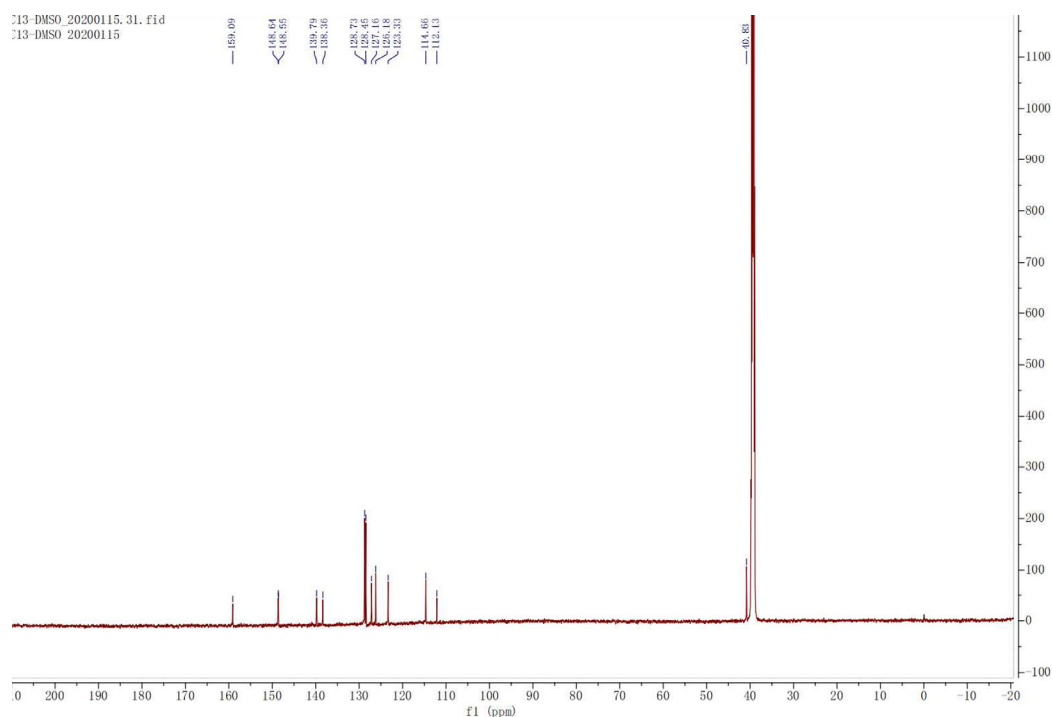

**Figure S52.**  $^{13}\text{C}$  NMR (151 MHz,  $\text{DMSO}-d_6$ ) spectrum of **18a**

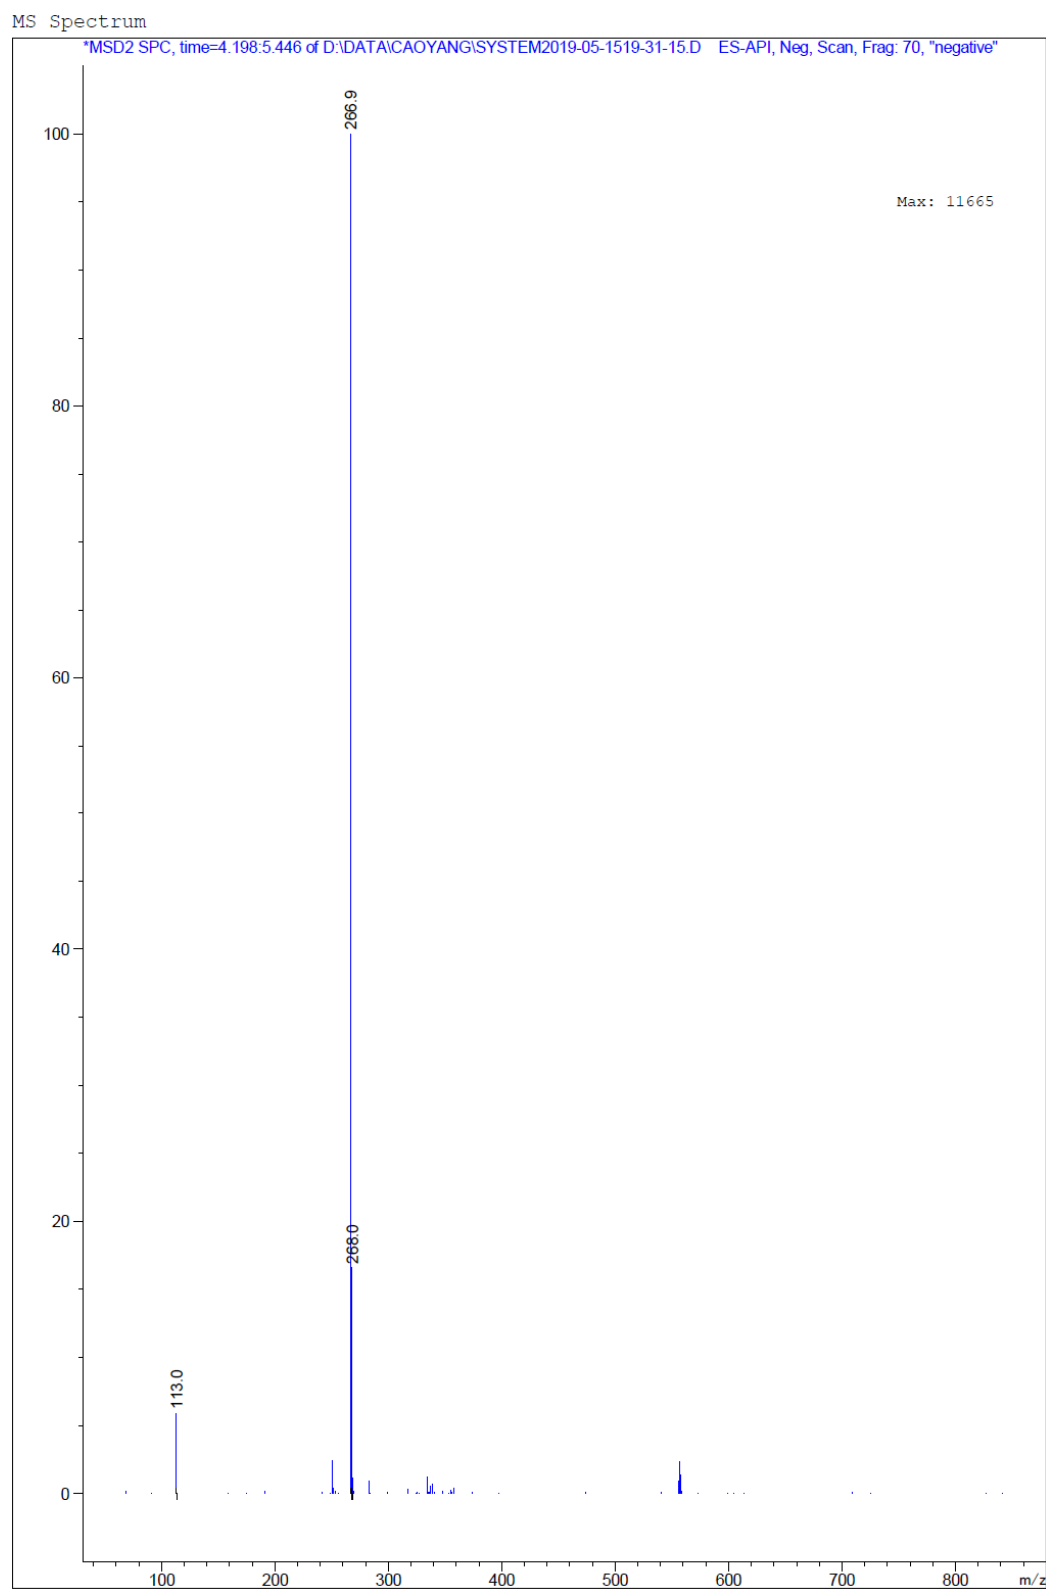

**Figure S53.** Mass spectrum (negative ionization) of **18a**

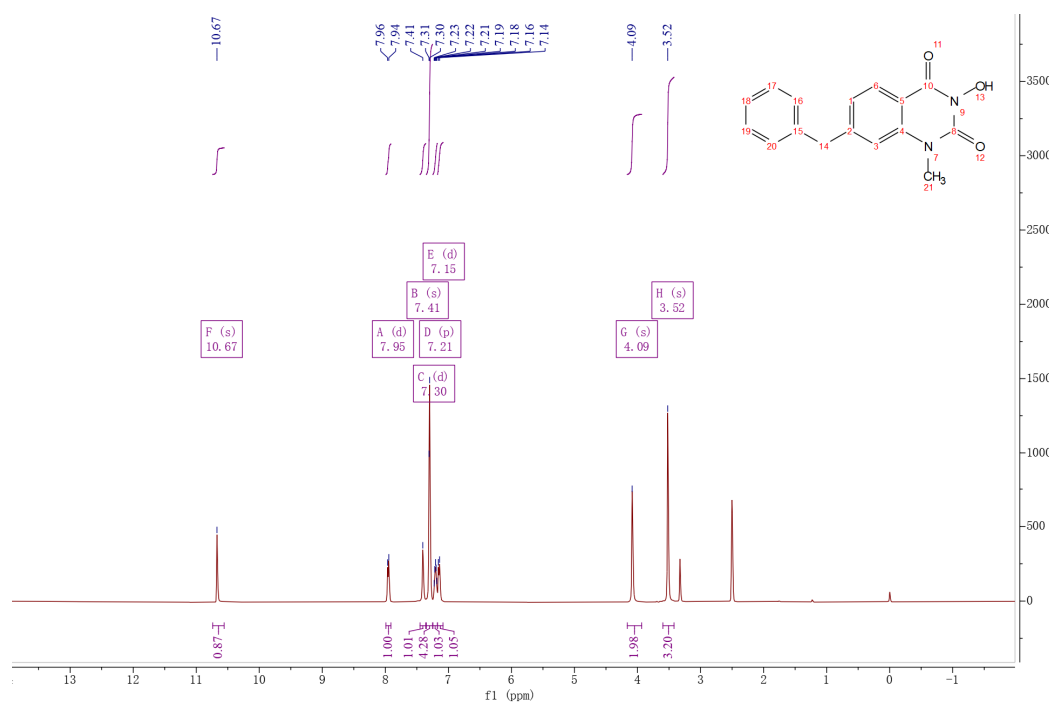

**Figure S54.**  $^1\text{H}$  NMR (400 MHz,  $\text{DMSO}-d_6$ ) spectrum of **18b**

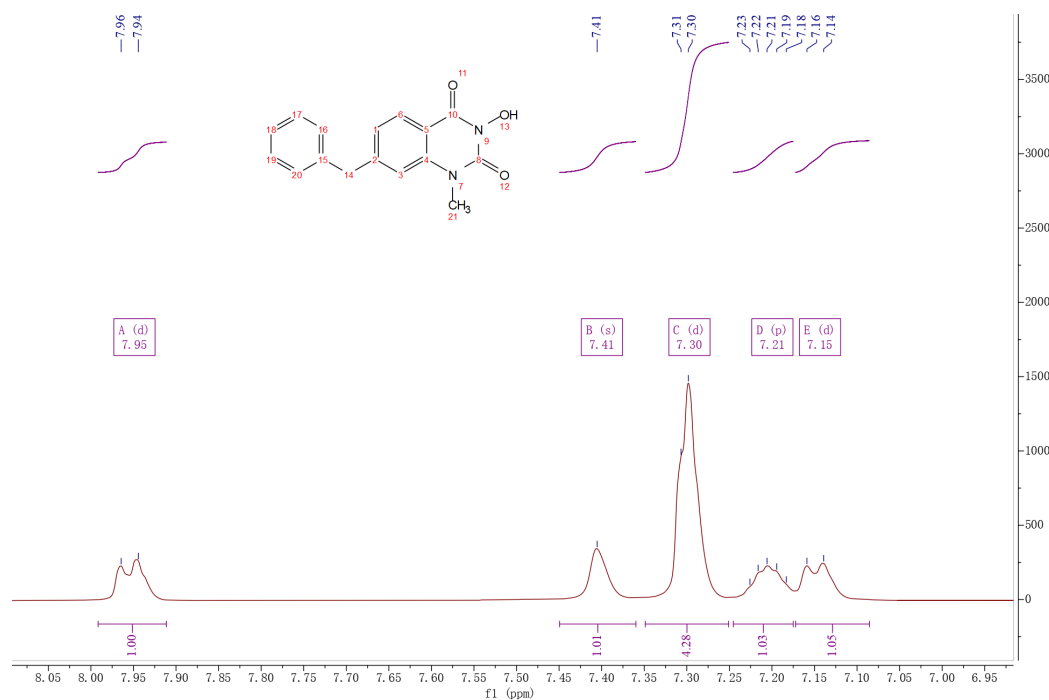

**Figure S55.** Magnified  $^1\text{H}$  NMR (400 MHz,  $\text{DMSO}-d_6$ ) spectrum fragments of **18b**

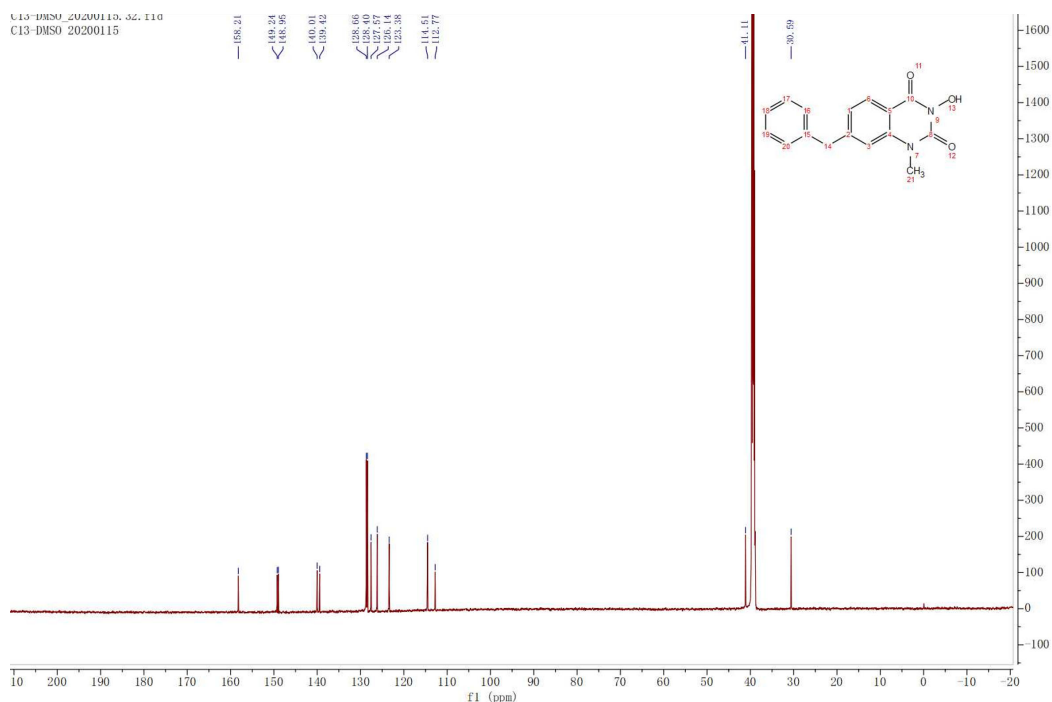

**Figure S56.**  $^{13}\text{C}$  NMR (151 MHz,  $\text{DMSO}-d_6$ ) spectrum of **18b**

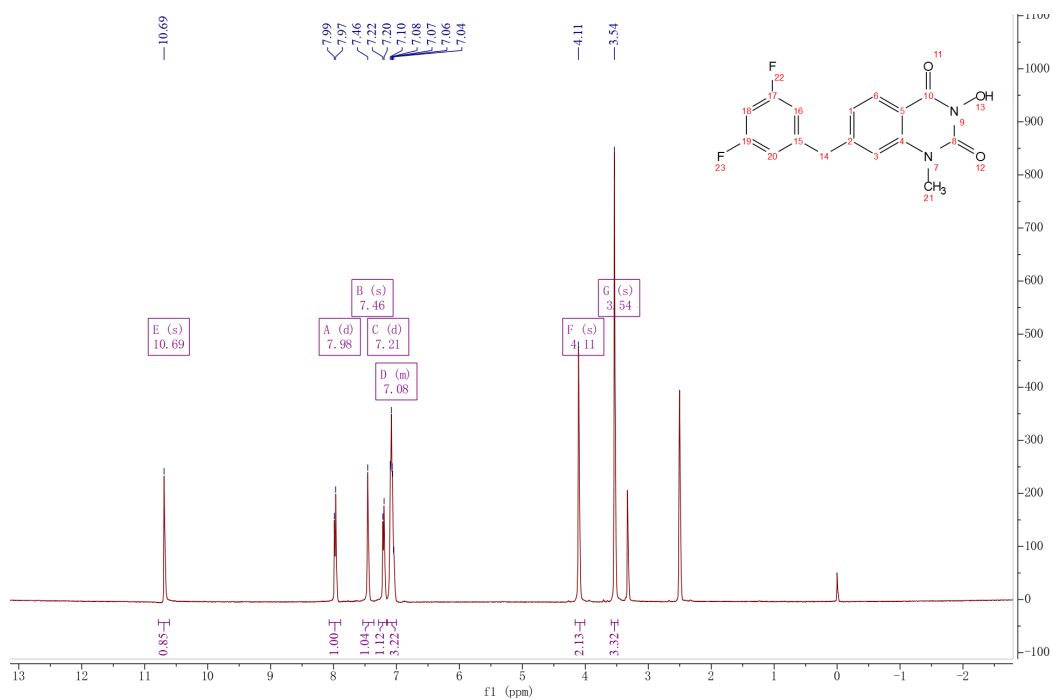

**Figure S57.**  $^1\text{H}$  NMR (400 MHz,  $\text{DMSO}-d_6$ ) spectrum of **18c**



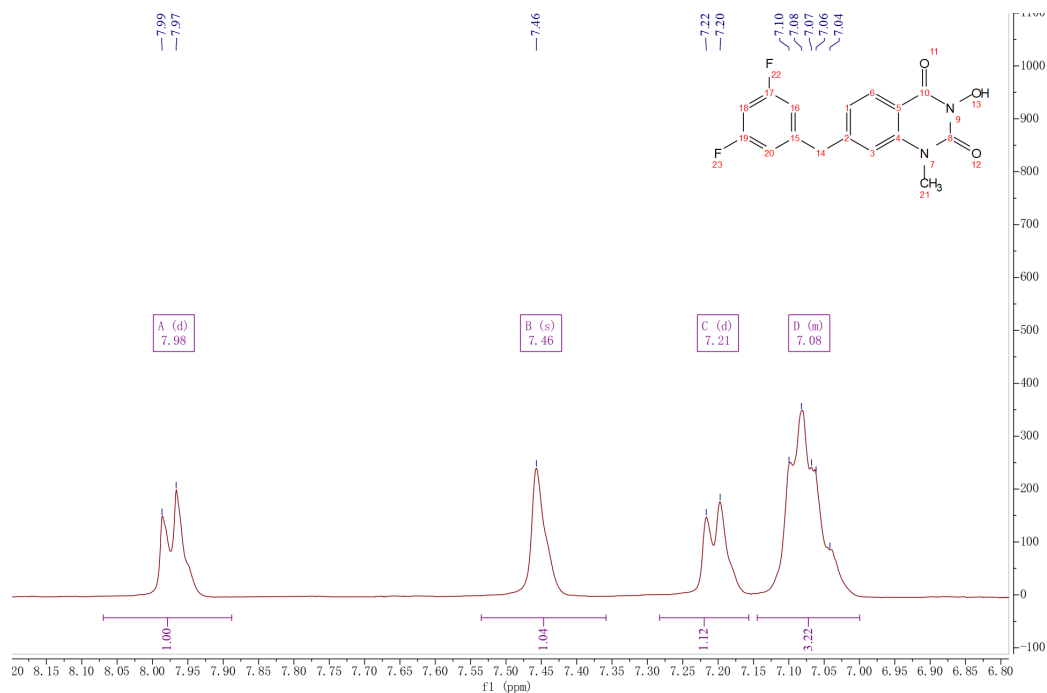

**Figure S58.** Magnified  $^1\text{H}$  NMR (400 MHz,  $\text{DMSO}-d_6$ ) spectrum fragments of **18c**

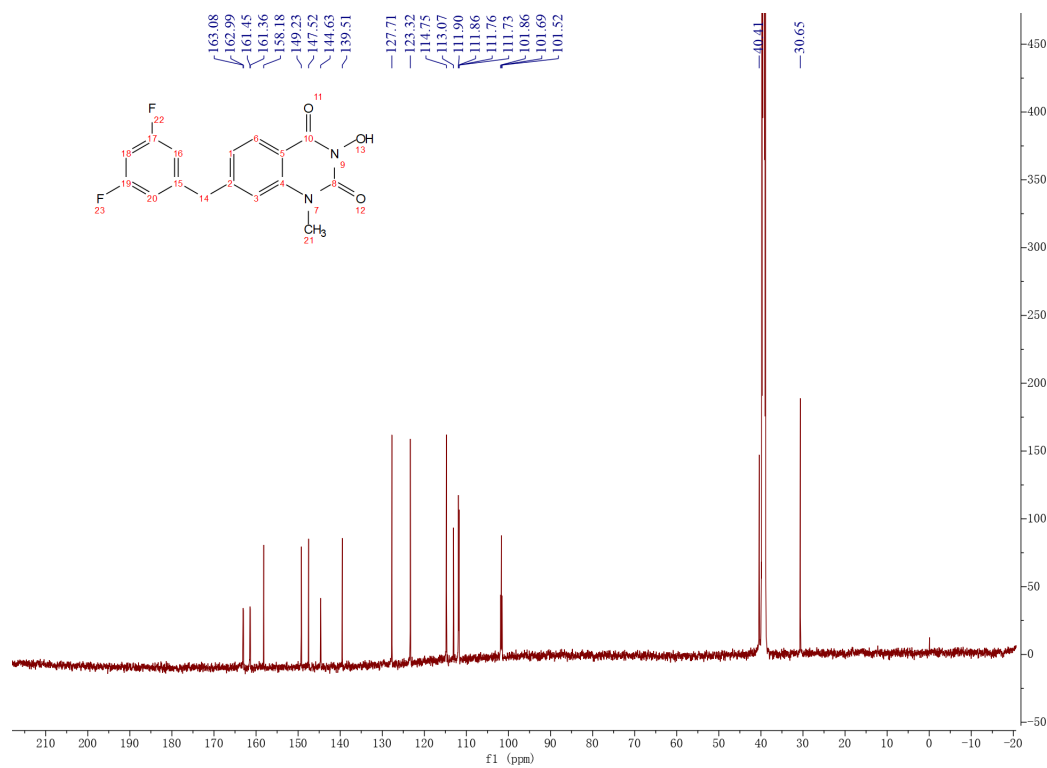

**Figure S59.**  $^{13}\text{C}$  NMR (151 MHz,  $\text{DMSO}-d_6$ ) spectrum of **18c**

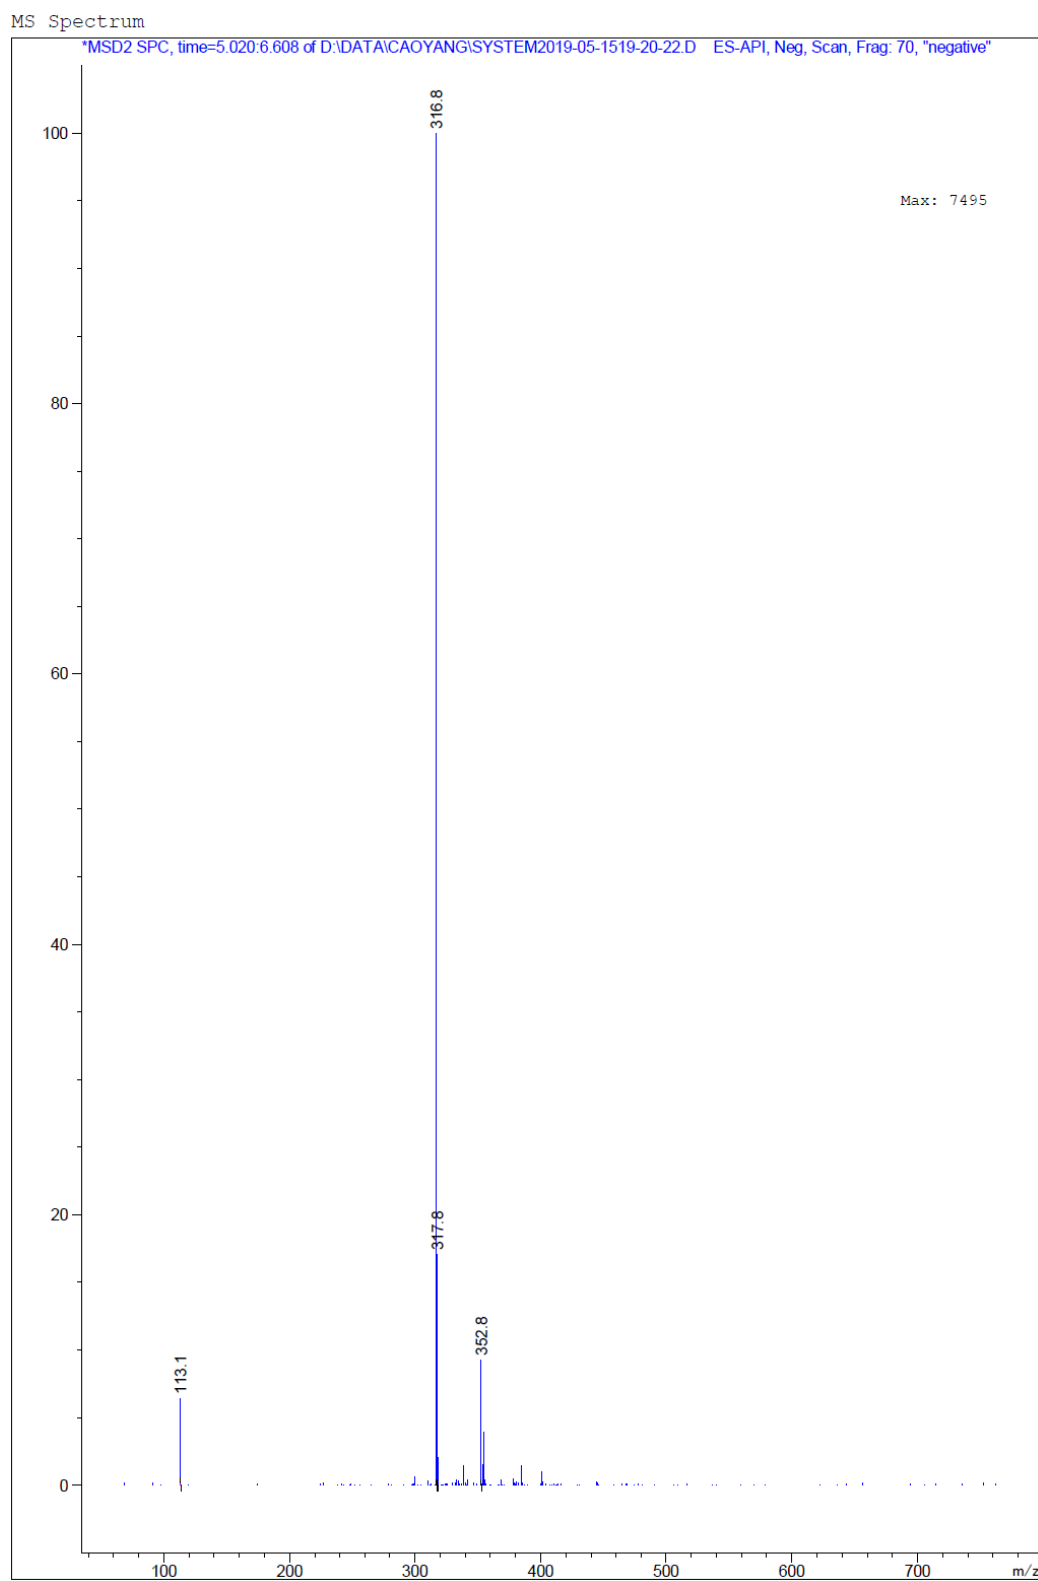

**Figure S60.** Mass spectrum (negative ionization) of **18c**

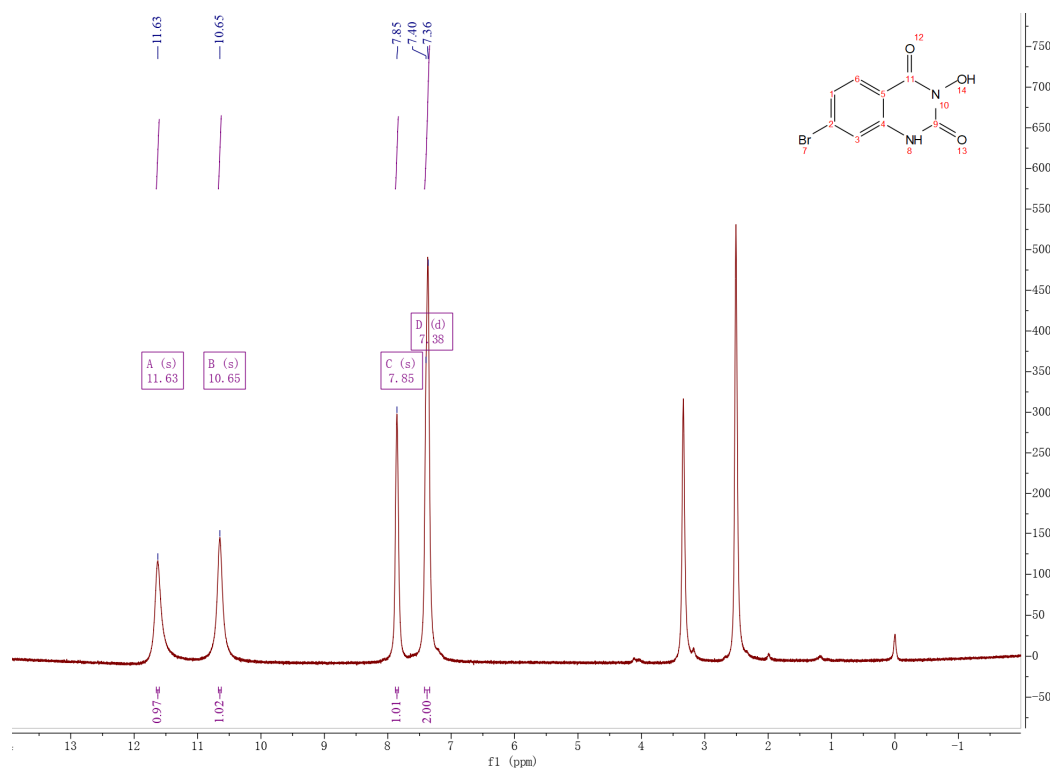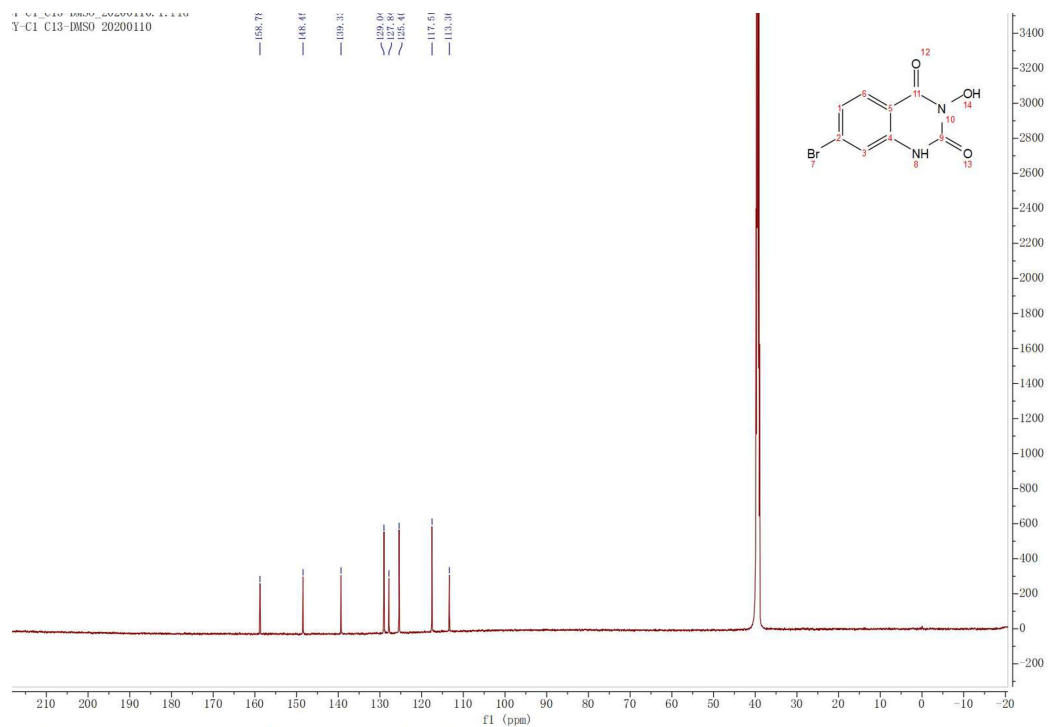

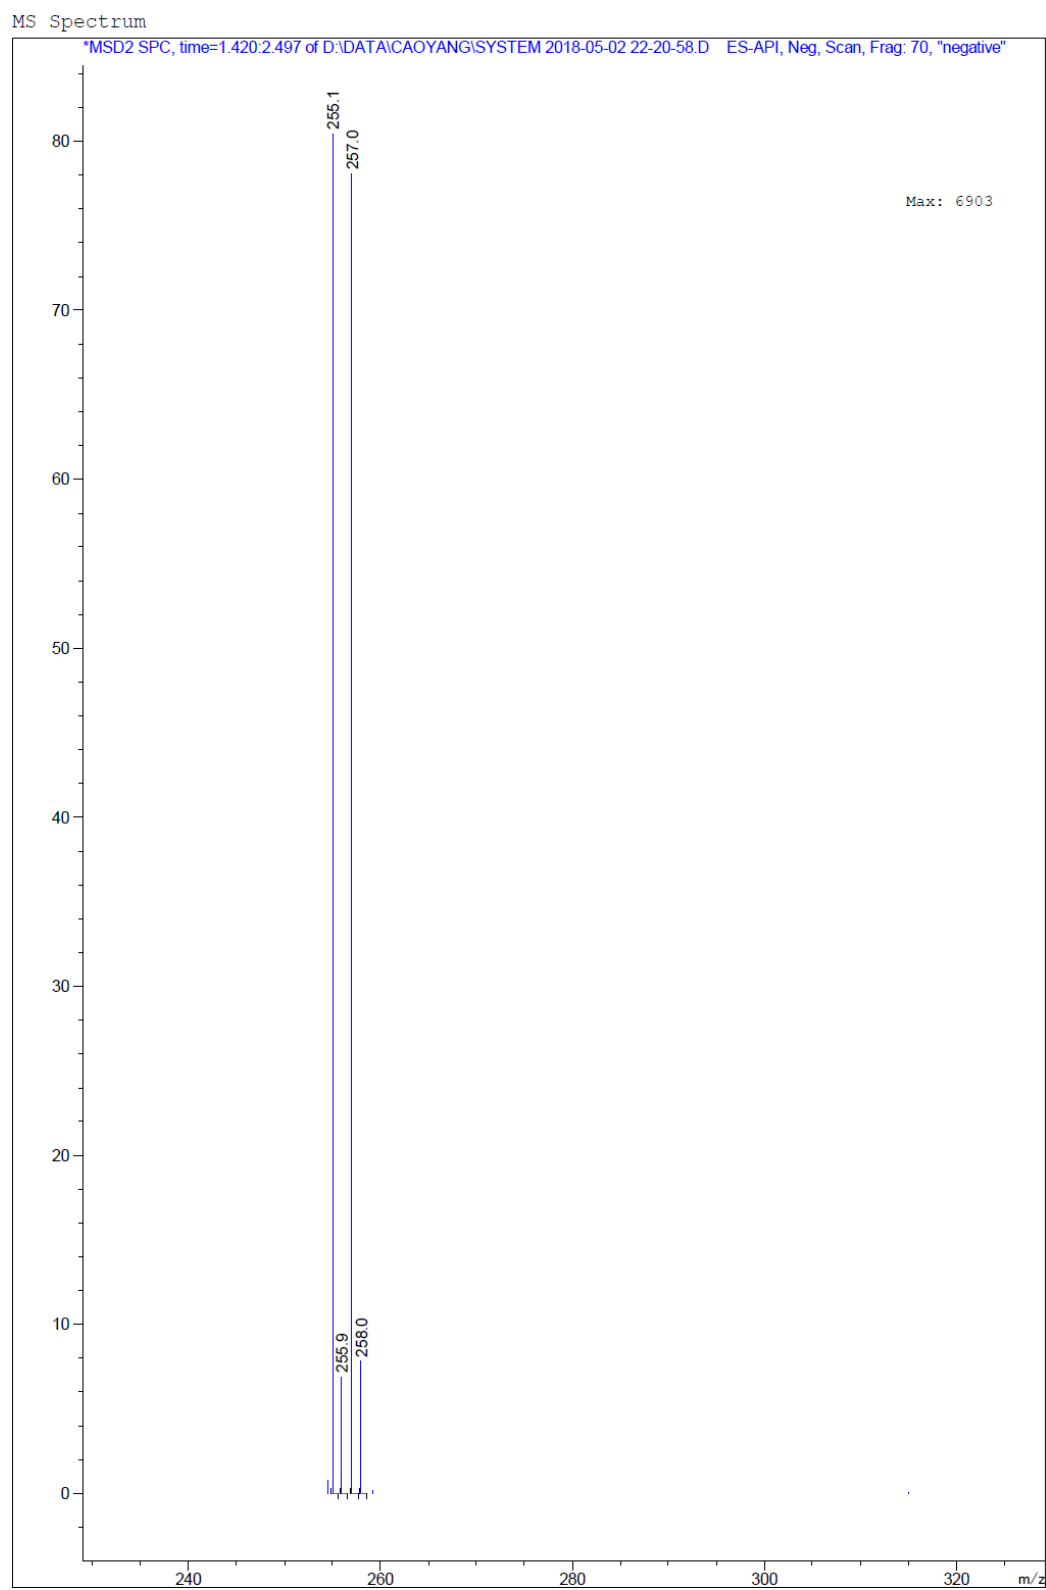

**Figure S63.** Mass spectrum (negative ionization) of **19**

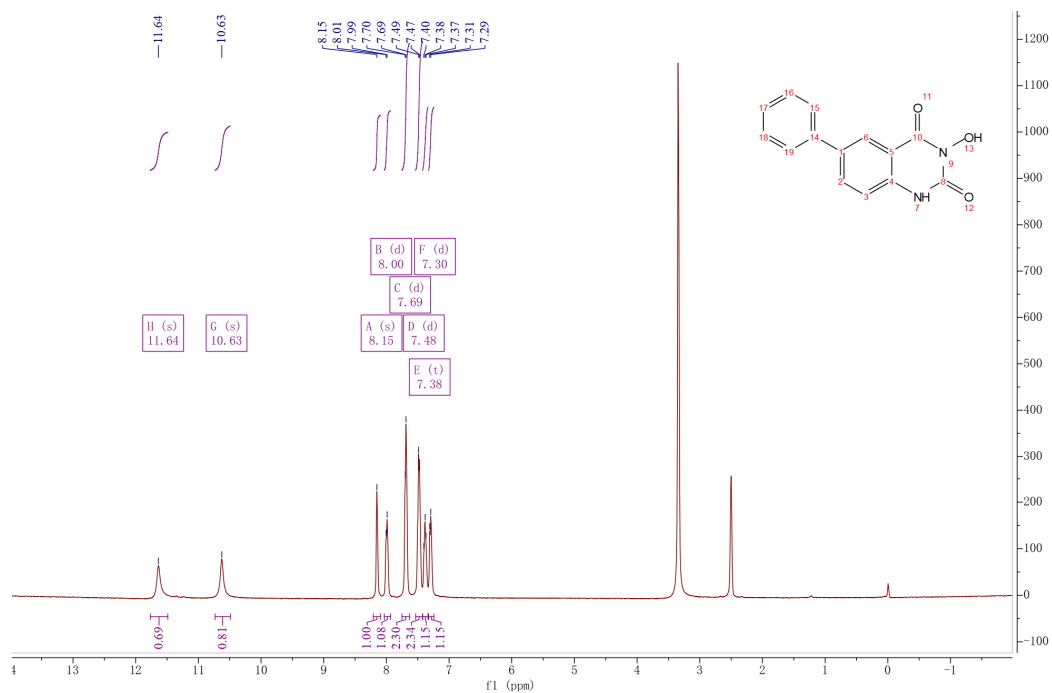

**Figure S64.**  $^1\text{H}$  NMR (400 MHz,  $\text{DMSO}-d_6$ ) spectrum of **21a**

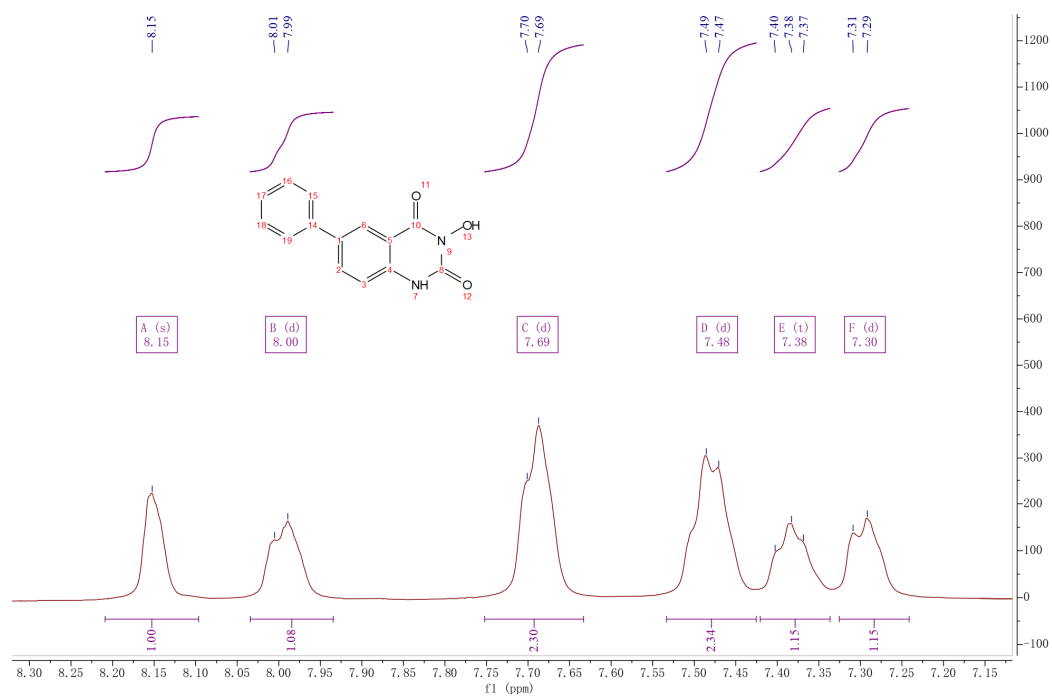

**Figure S65.** Magnified  $^1\text{H}$  NMR (400 MHz,  $\text{DMSO}-d_6$ ) spectrum fragments of **21a**

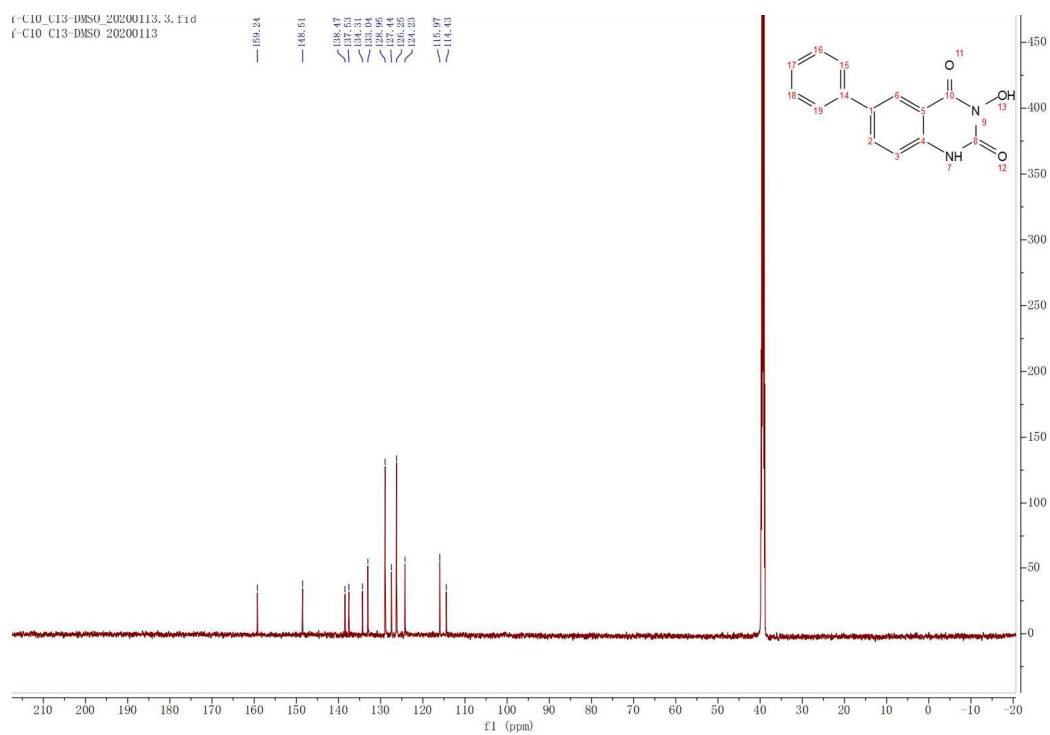

**Figure S66.**  $^{13}\text{C}$  NMR (151 MHz,  $\text{DMSO}-d_6$ ) spectrum of **21a**

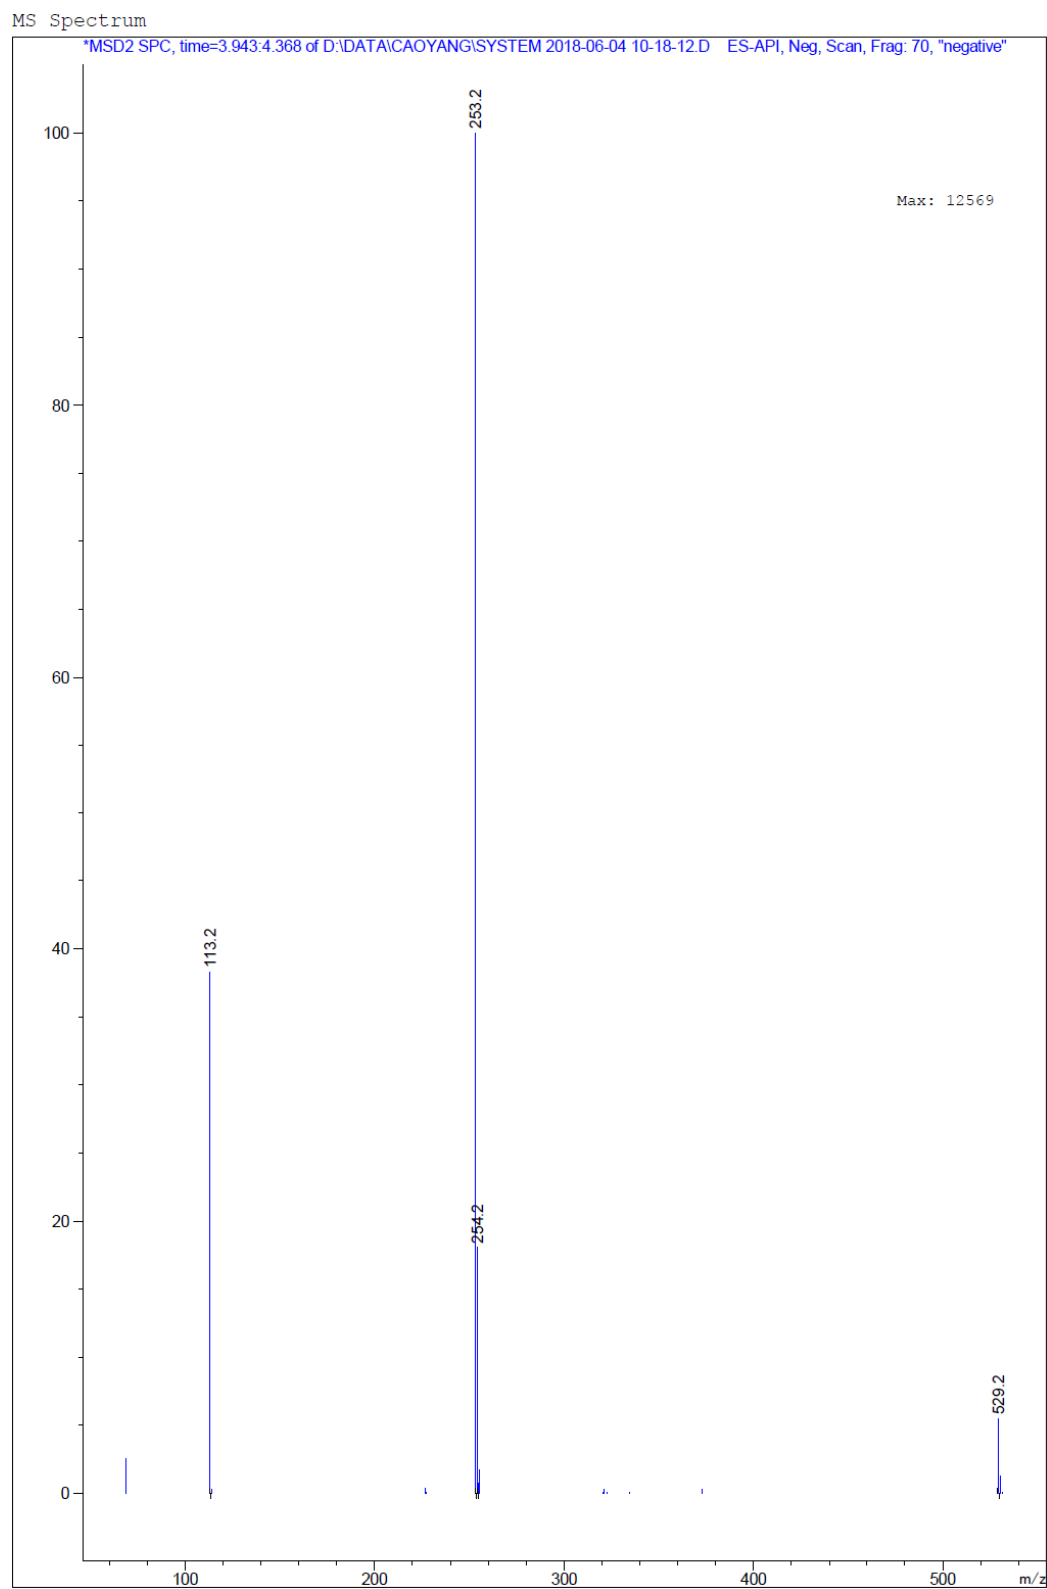

**Figure S67.** Mass spectrum (negative ionization) of **21a**

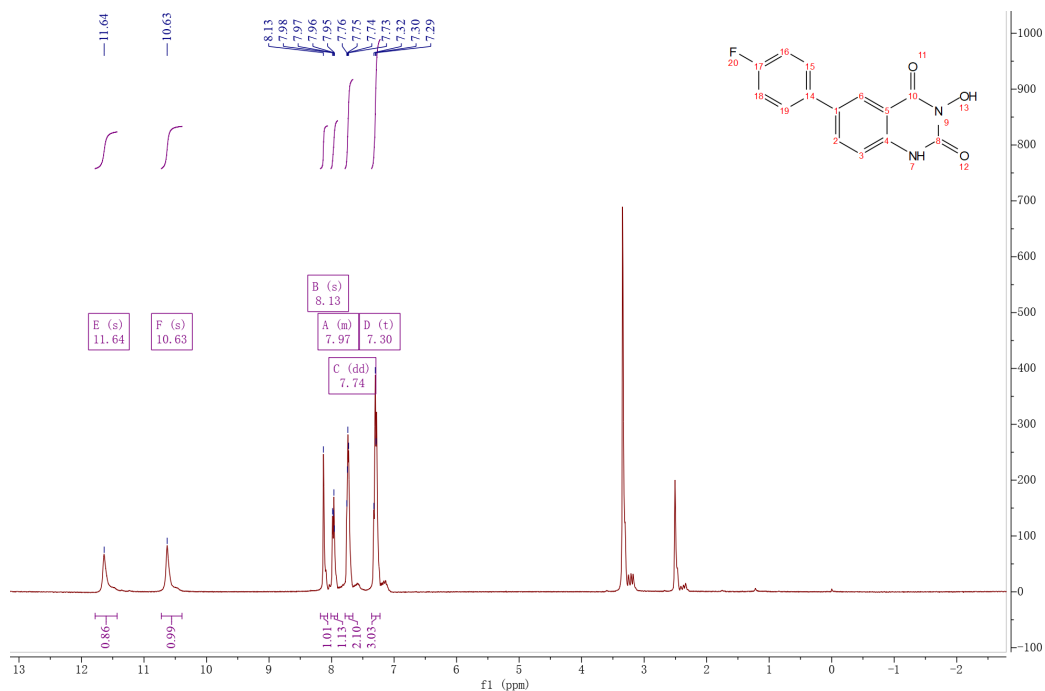

**Figure S68.**  $^1\text{H}$  NMR (400 MHz,  $\text{DMSO}-d_6$ ) spectrum of **21b**

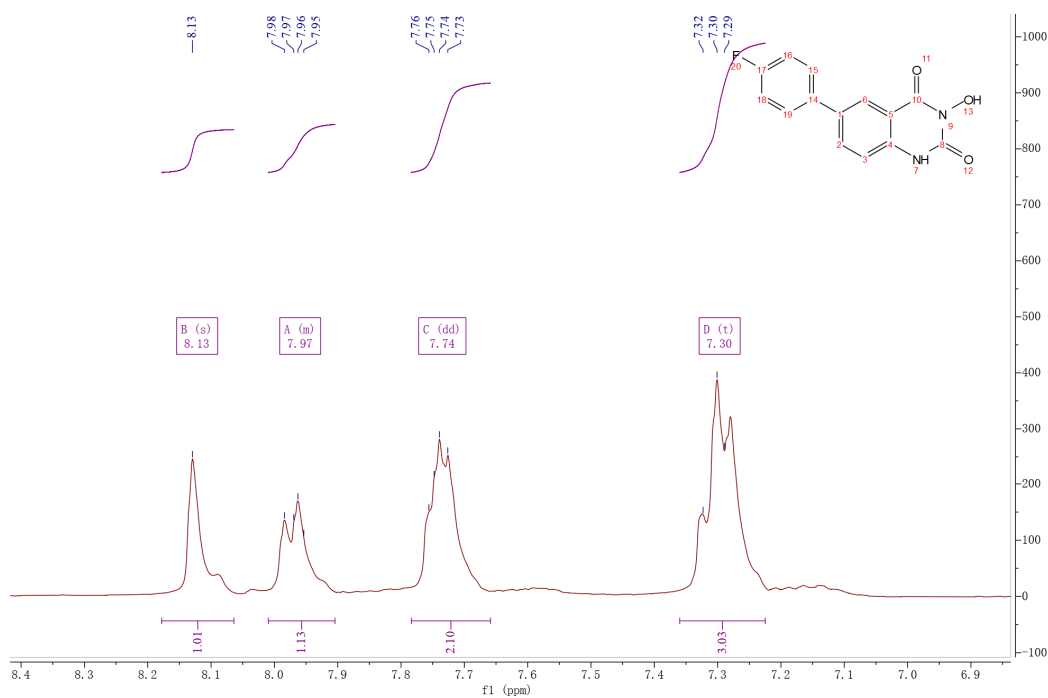

**Figure S69.** Magnified  $^1\text{H}$  NMR (400 MHz,  $\text{DMSO}-d_6$ ) spectrum fragments of **21b**



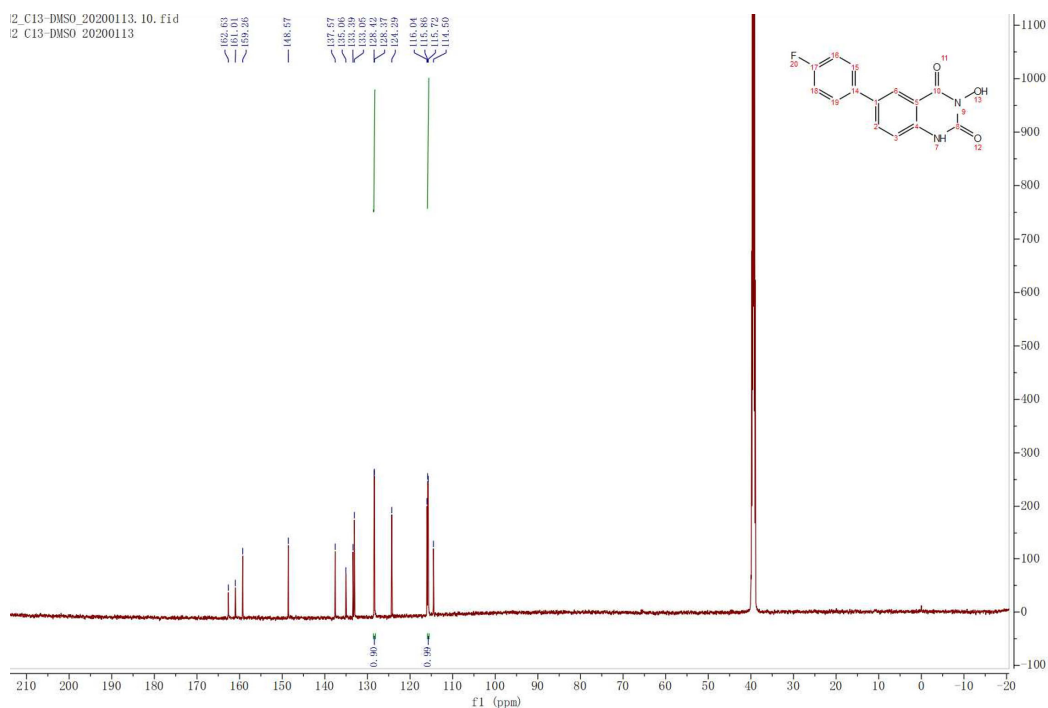

**Figure S70.**  $^{13}\text{C}$  NMR (151 MHz,  $\text{DMSO}-d_6$ ) spectrum of **21b**

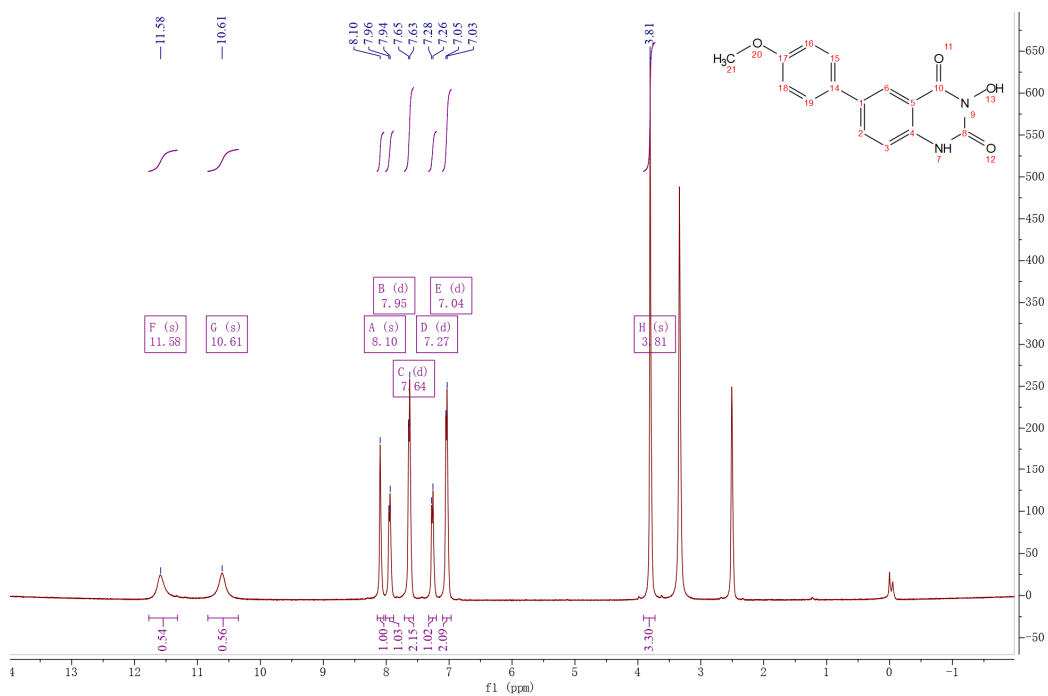

**Figure S71.**  $^1\text{H}$  NMR (400 MHz,  $\text{DMSO}-d_6$ ) spectrum of **21c**

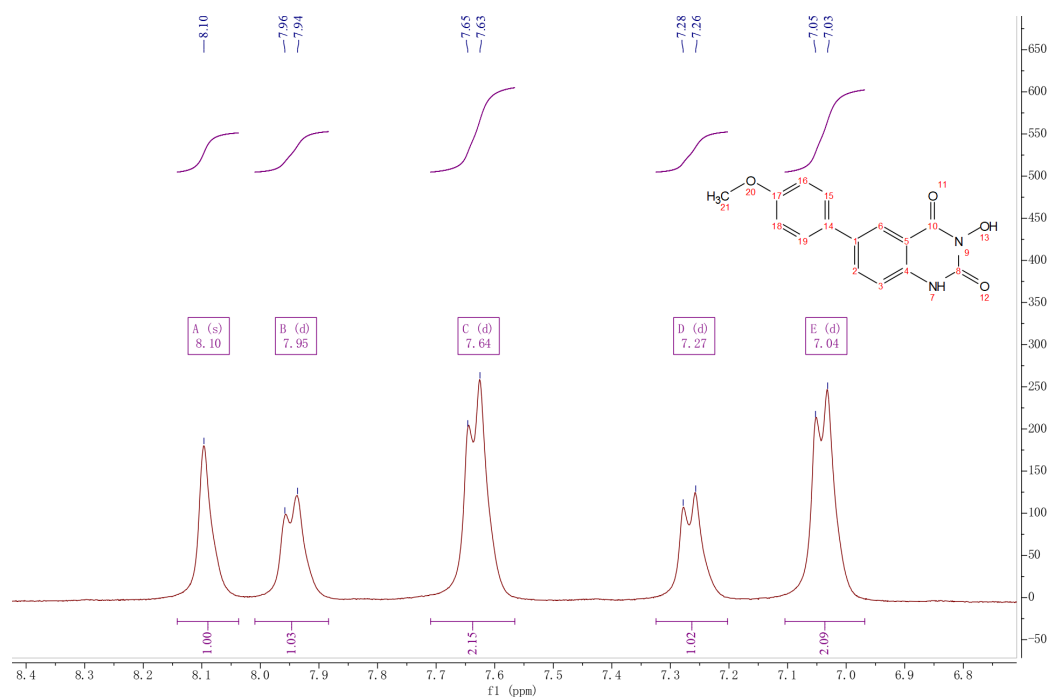

**Figure S72.** Magnified  $^1\text{H}$  NMR (400 MHz,  $\text{DMSO}-d_6$ ) spectrum fragments of **21c**

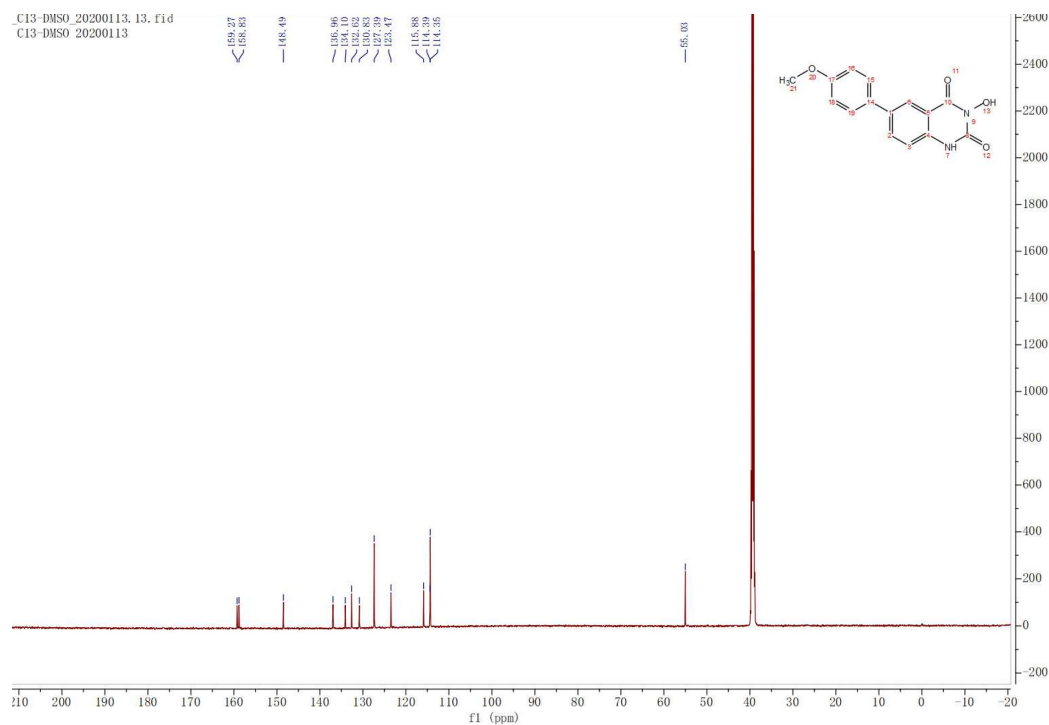

**Figure S73.**  $^{13}\text{C}$  NMR (151 MHz,  $\text{DMSO}-d_6$ ) spectrum of **21c**

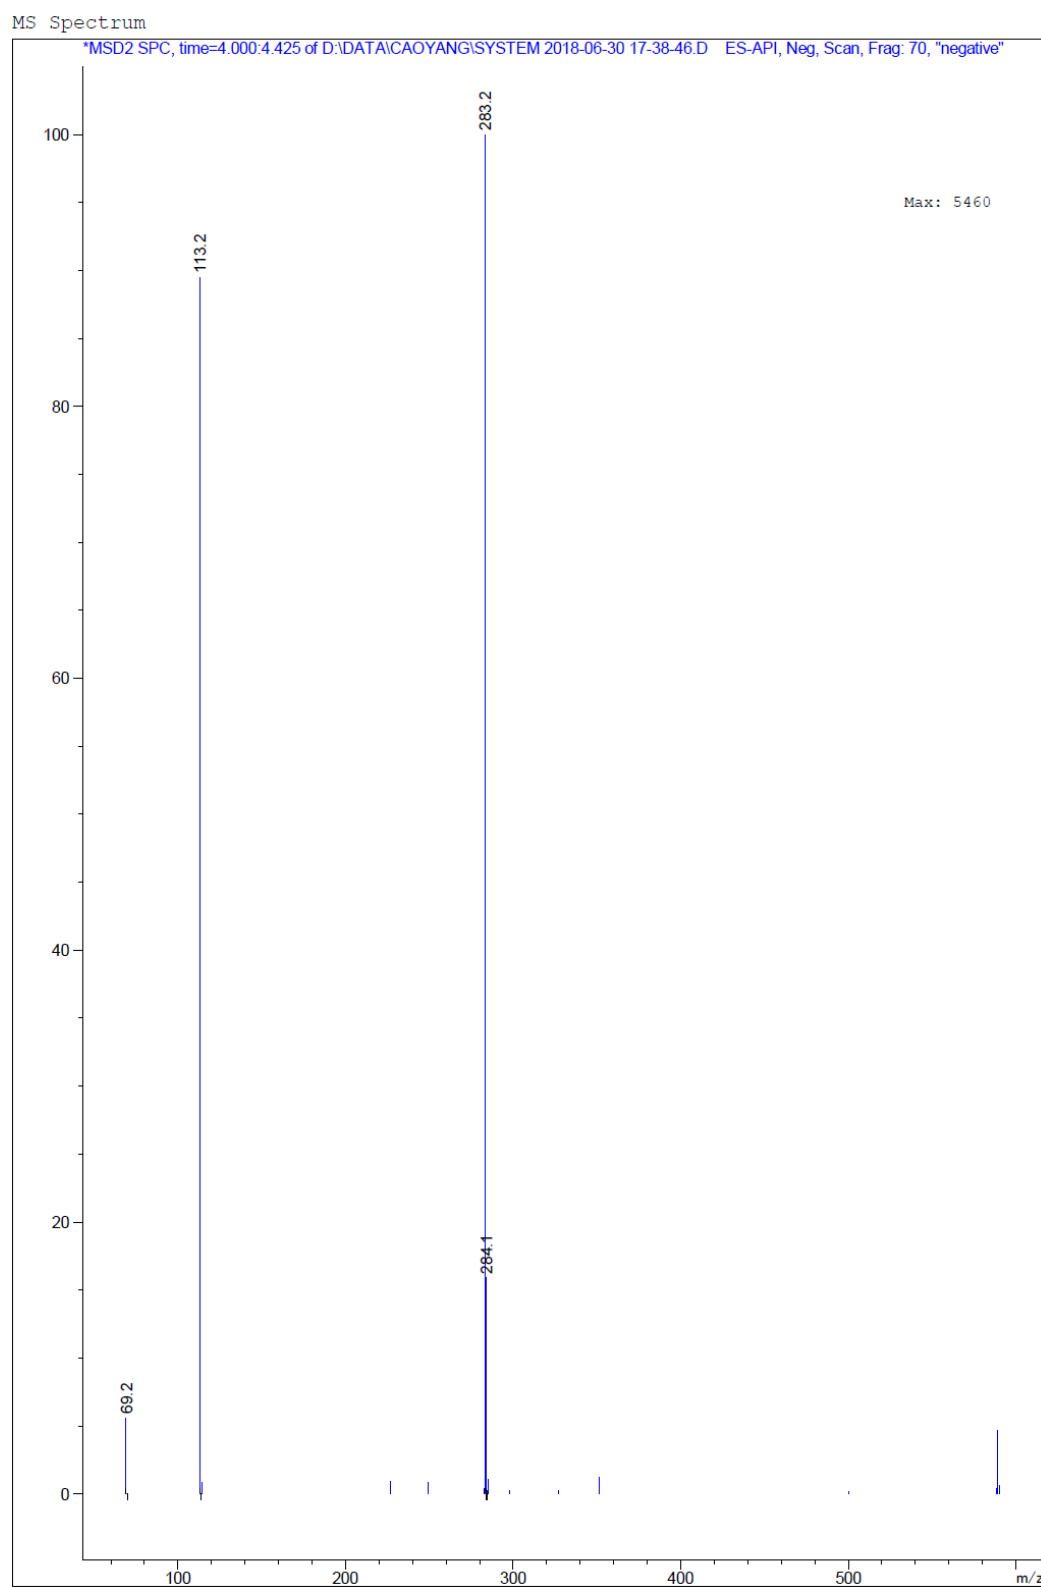

**Figure S74.** Mass spectrum (negative ionization) of **21c**

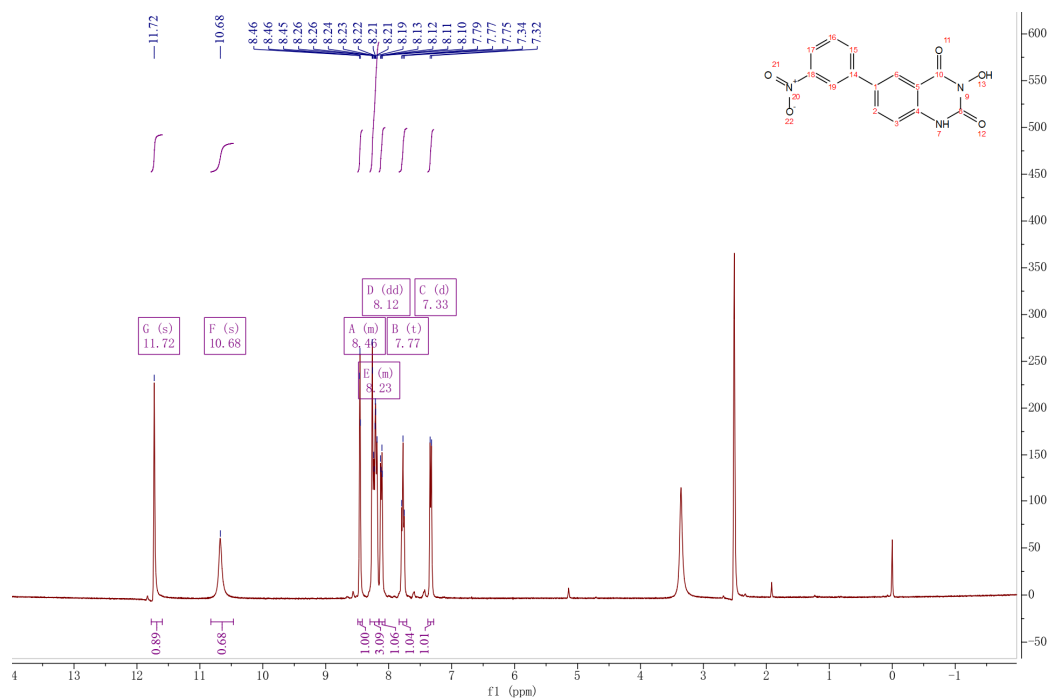

**Figure S75.**  $^1\text{H}$  NMR (400 MHz,  $\text{DMSO}-d_6$ ) spectrum of **21d**

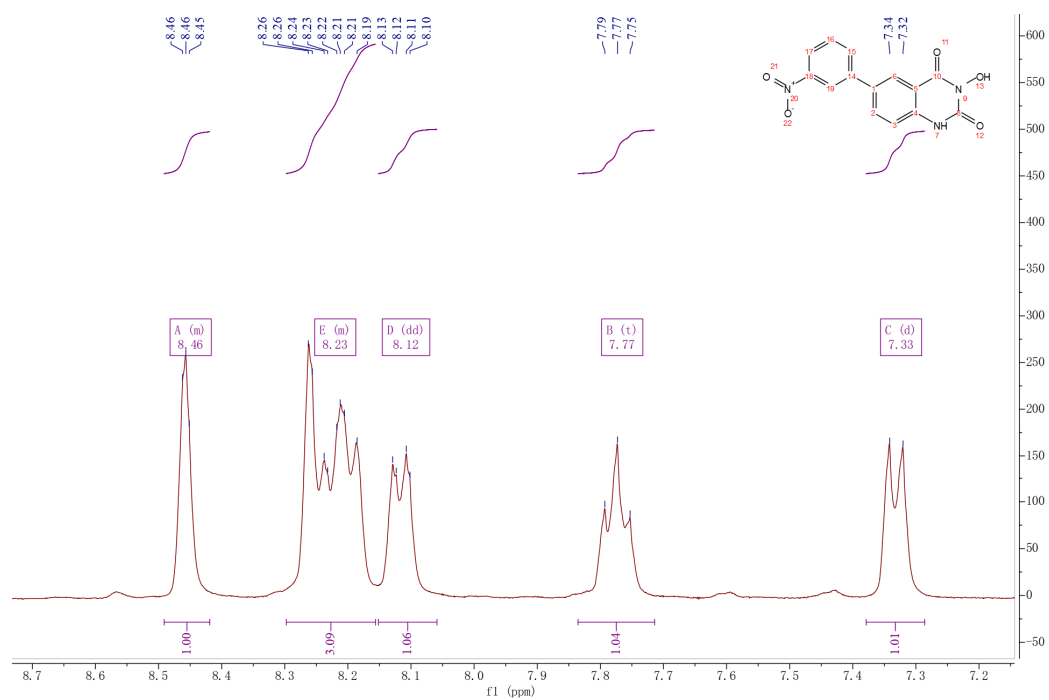

**Figure S76.** Magnified  $^1\text{H}$  NMR (400 MHz,  $\text{DMSO}-d_6$ ) spectrum fragments of **21d**

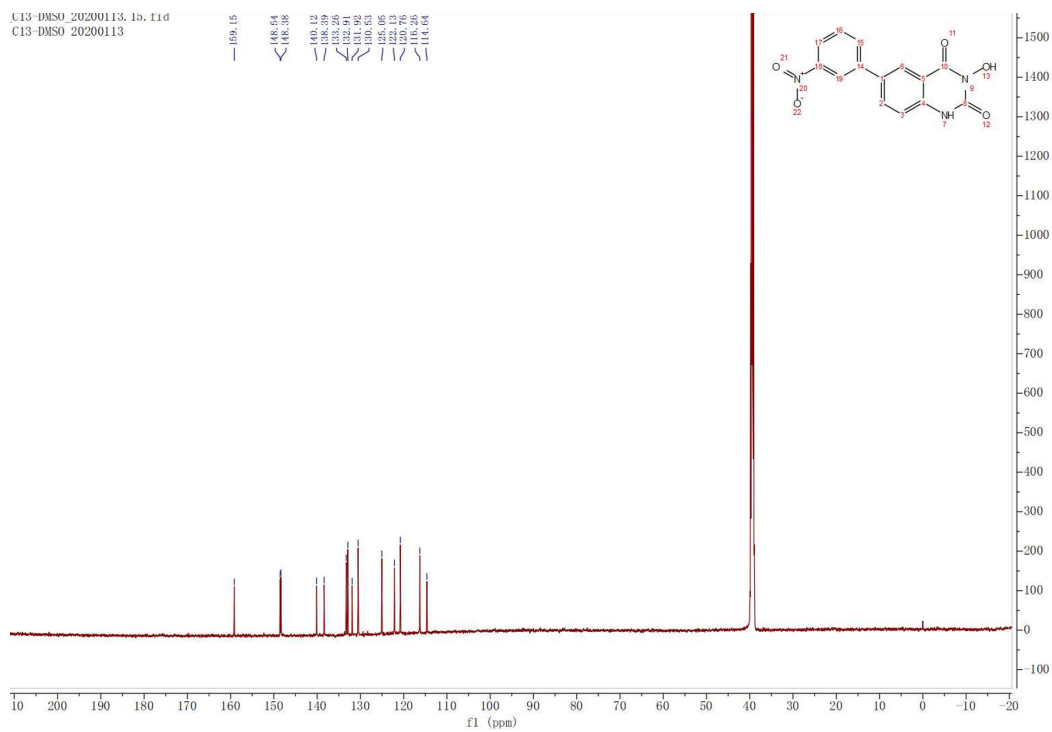

**Figure S77.**  $^{13}\text{C}$  NMR (151 MHz,  $\text{DMSO}-d_6$ ) spectrum of **21d**

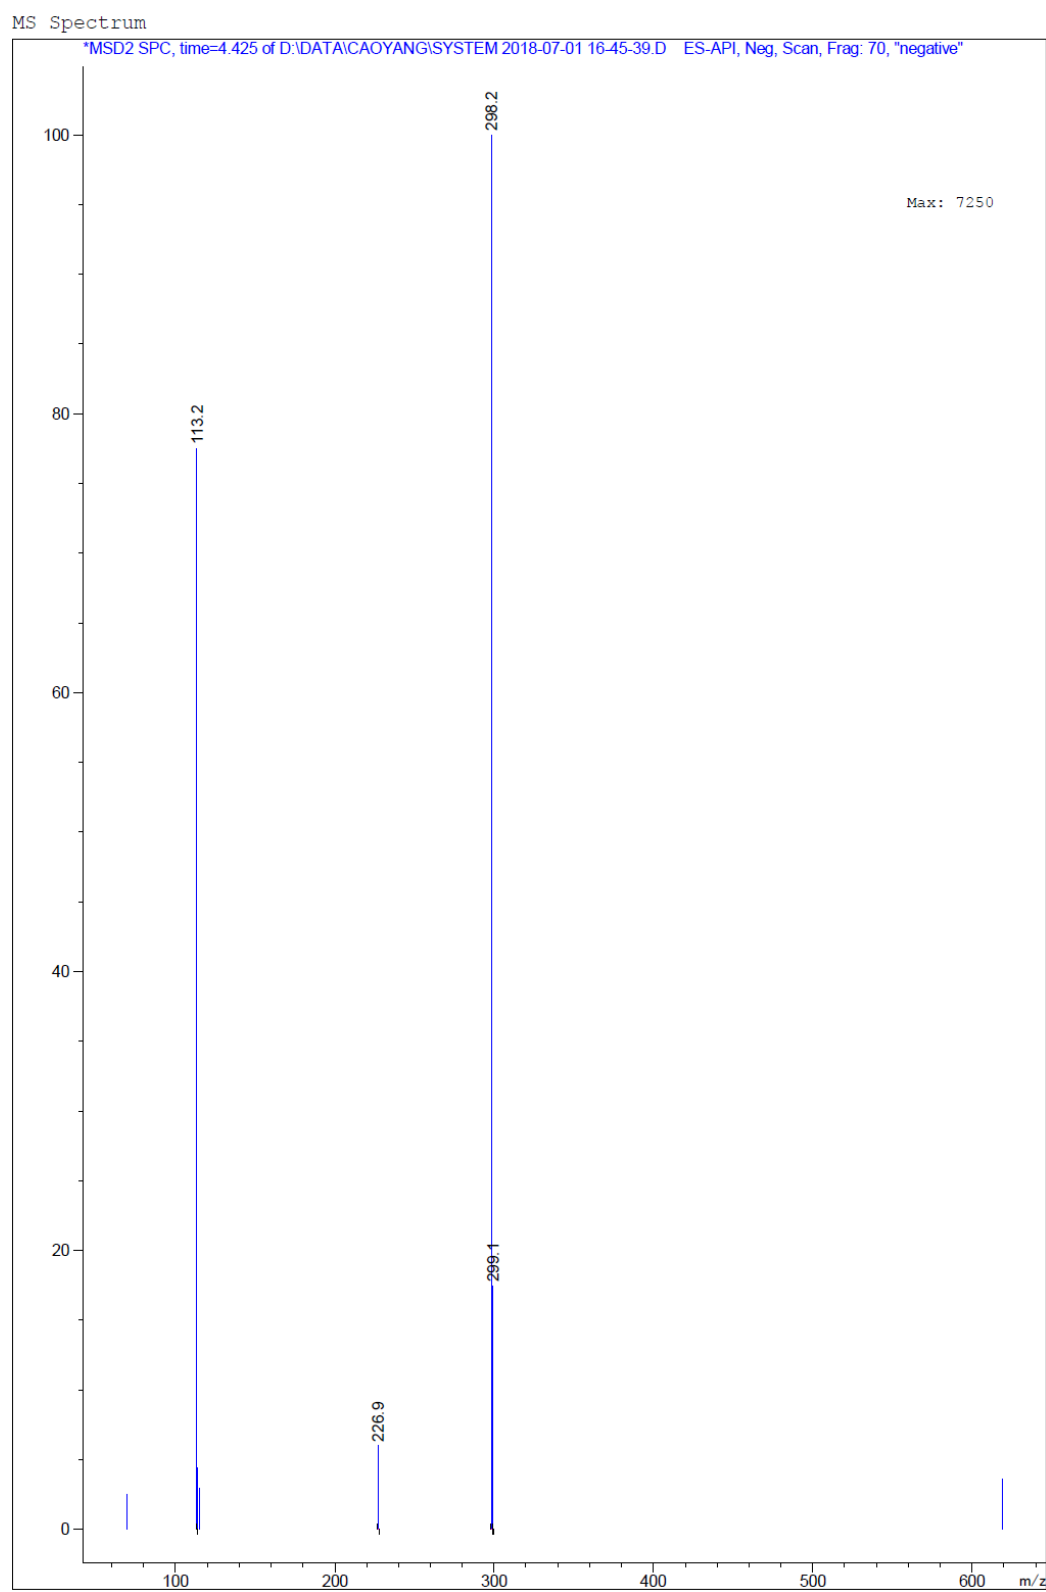

**Figure S78.** Mass spectrum (negative ionization) of **21d**

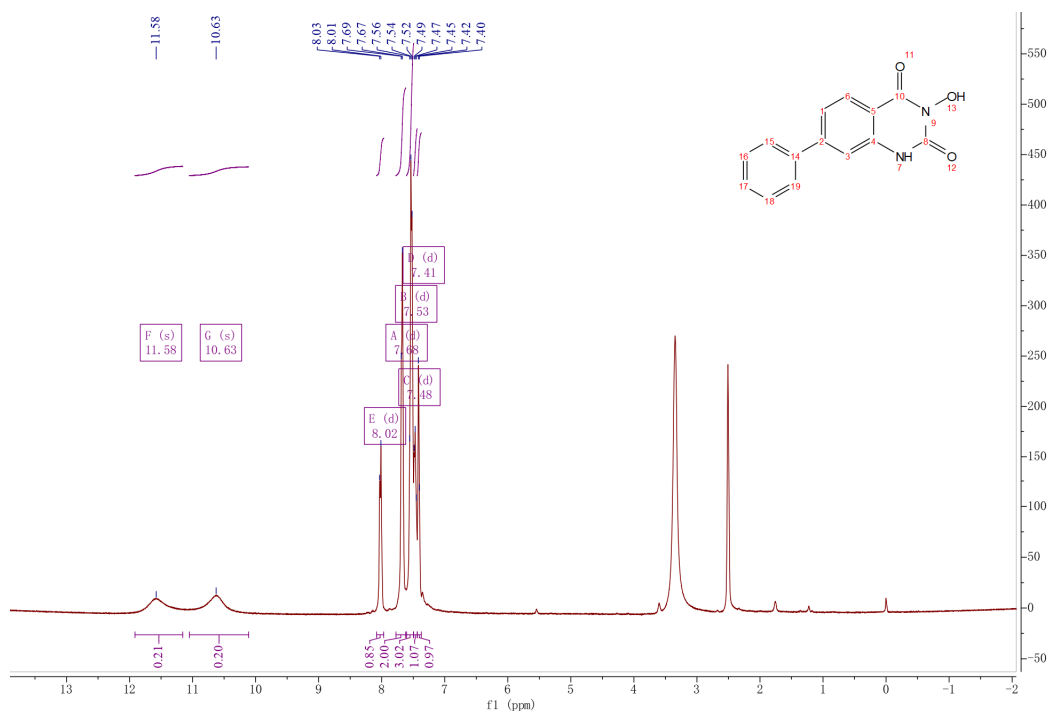

**Figure S79.**  $^1\text{H}$  NMR (400 MHz,  $\text{DMSO}-d_6$ ) spectrum of **21e**

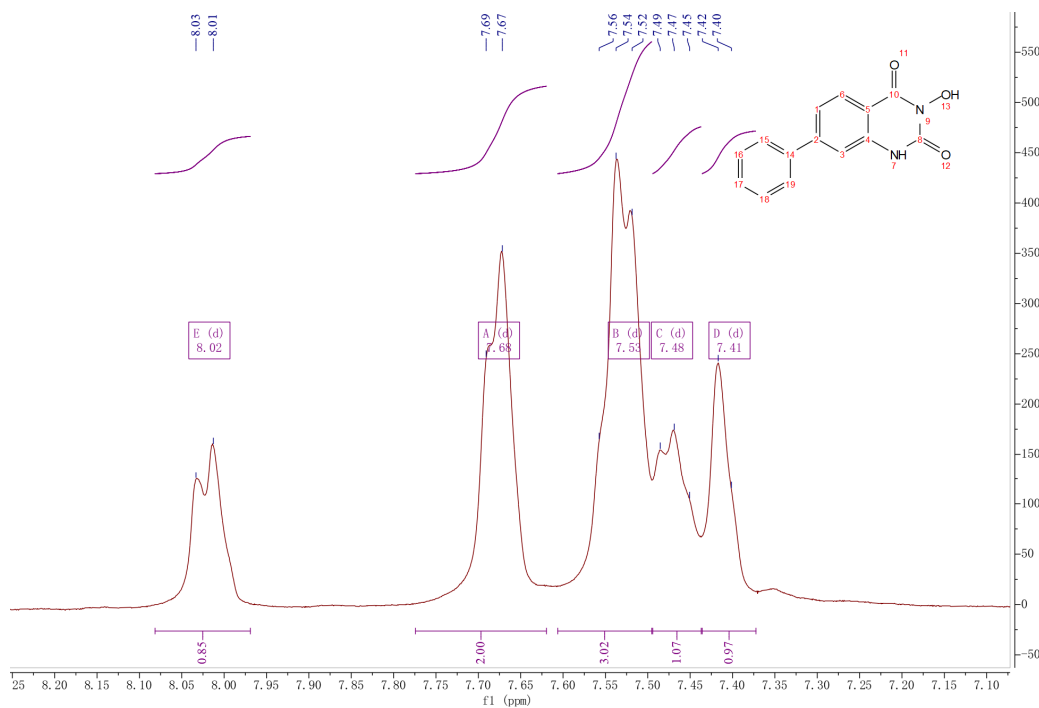

**Figure S80.** Magnified  $^1\text{H}$  NMR (400 MHz,  $\text{DMSO}-d_6$ ) spectrum fragments of **21e**

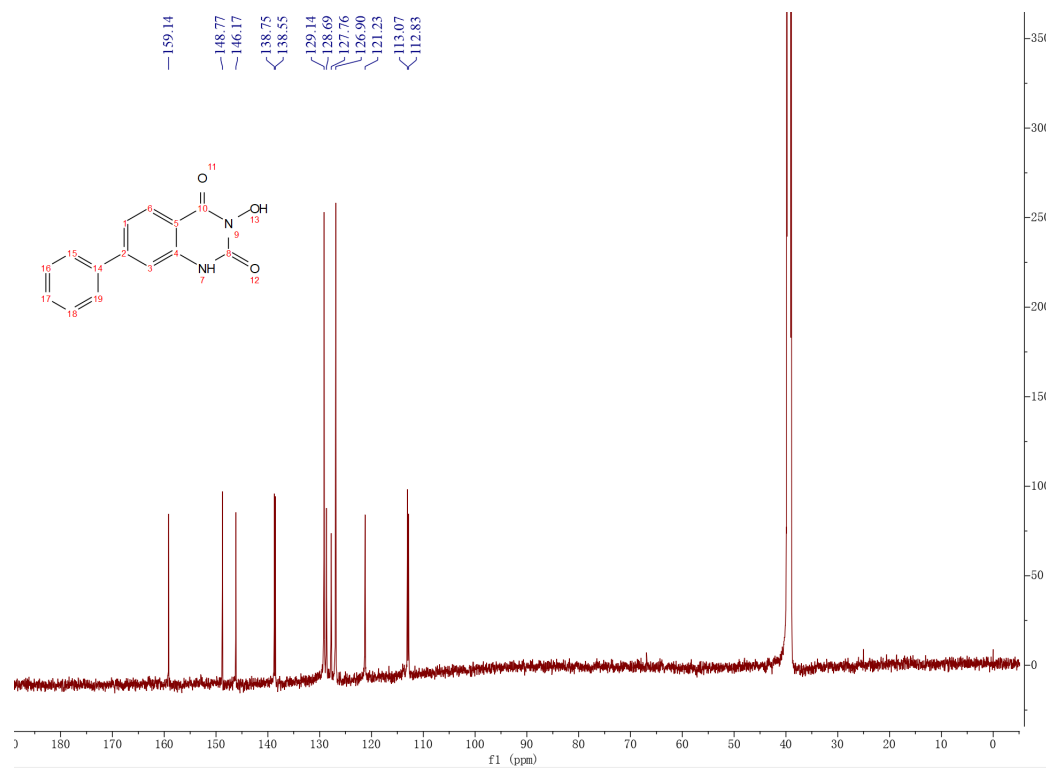

**Figure S81.** <sup>13</sup>C NMR (151 MHz, DMSO-*d*<sub>6</sub>) spectrum of **21e**



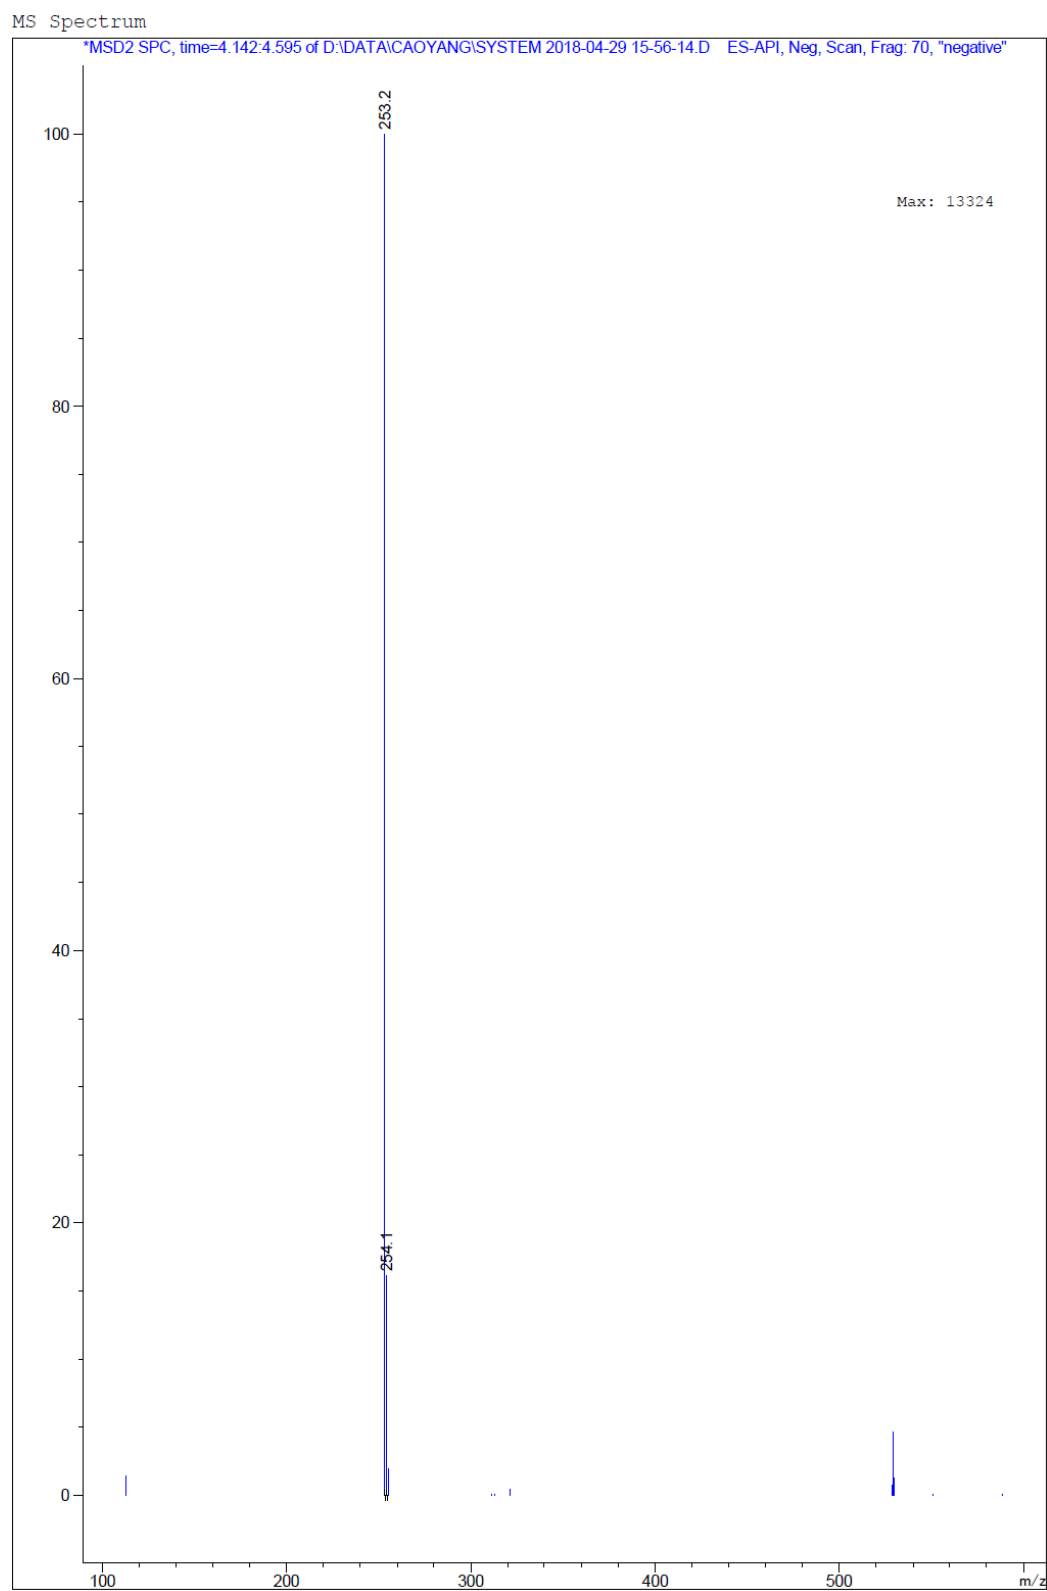

**Figure S82.** Mass spectrum (negative ionization) of **21e**

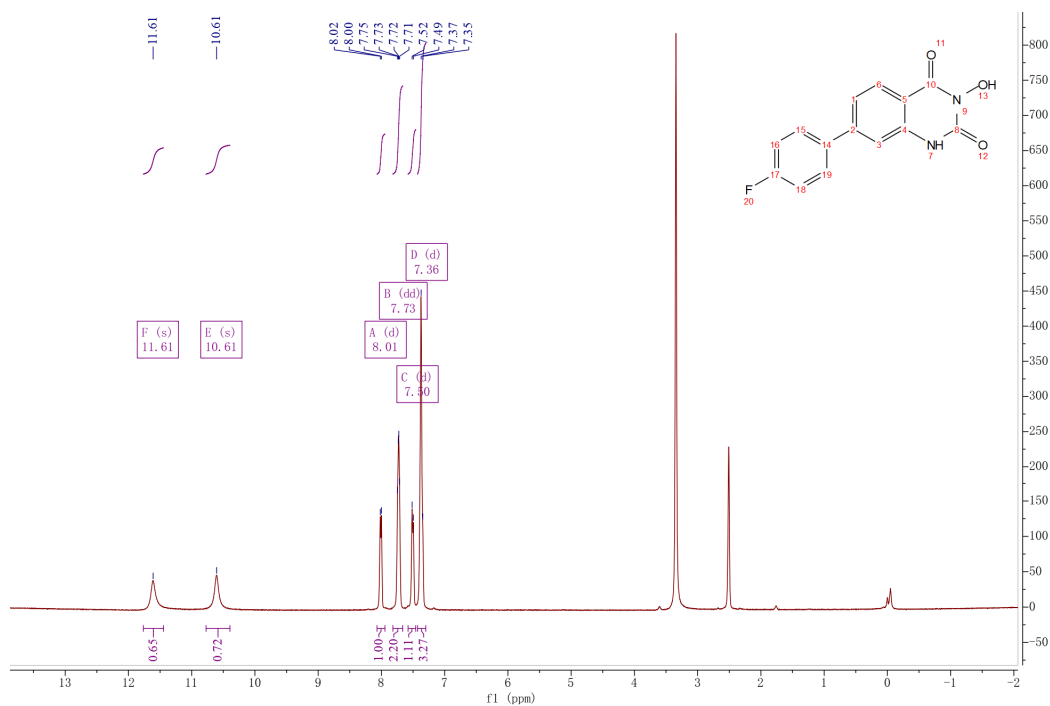

**Figure S83.**  $^1\text{H}$  NMR (400 MHz,  $\text{DMSO}-d_6$ ) spectrum of **21f**

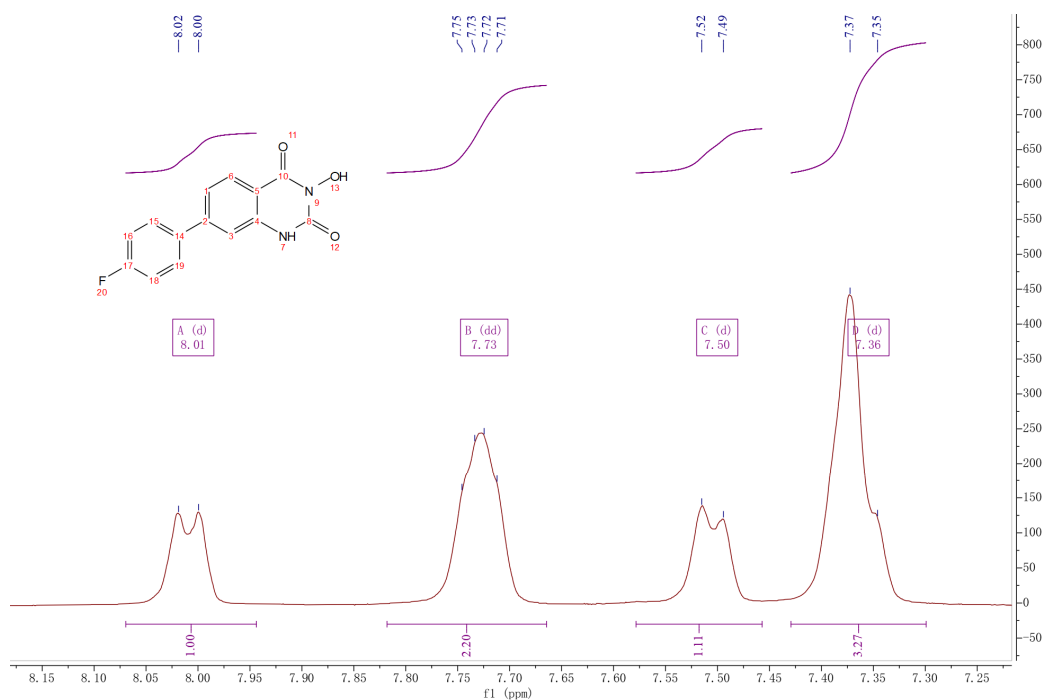

**Figure S84.** Magnified  $^1\text{H}$  NMR (400 MHz,  $\text{DMSO}-d_6$ ) spectrum fragments of **21f**

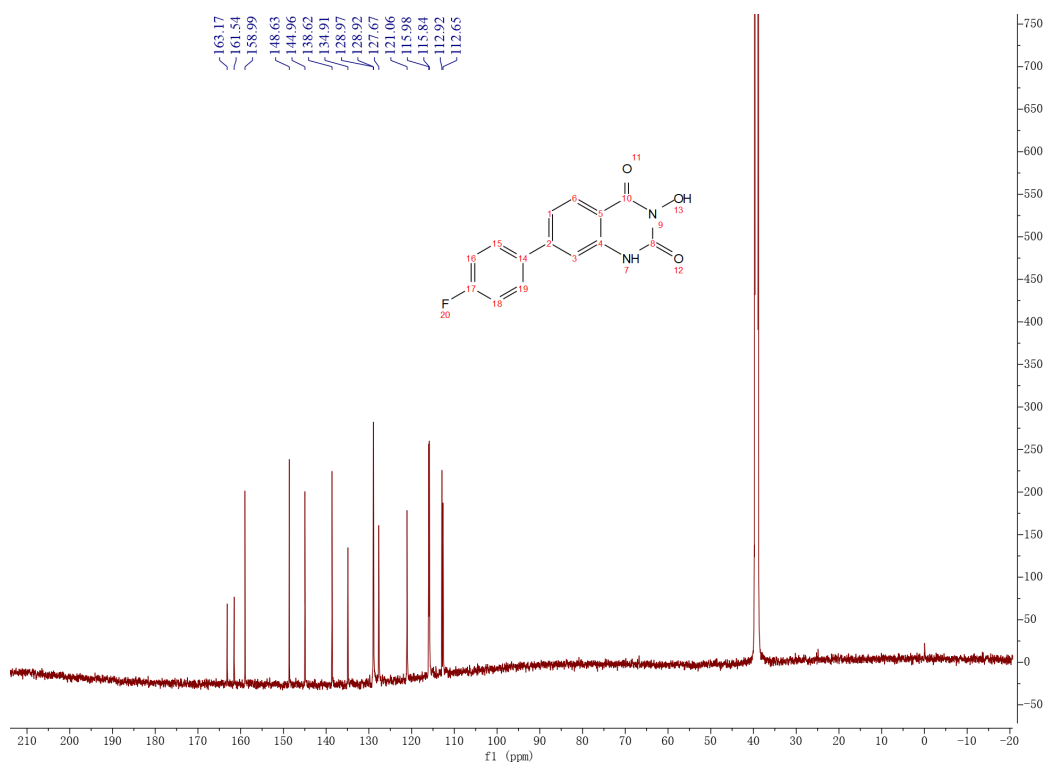

**Figure S85.**  $^{13}\text{C}$  NMR (151 MHz,  $\text{DMSO}-d_6$ ) spectrum of **21f**

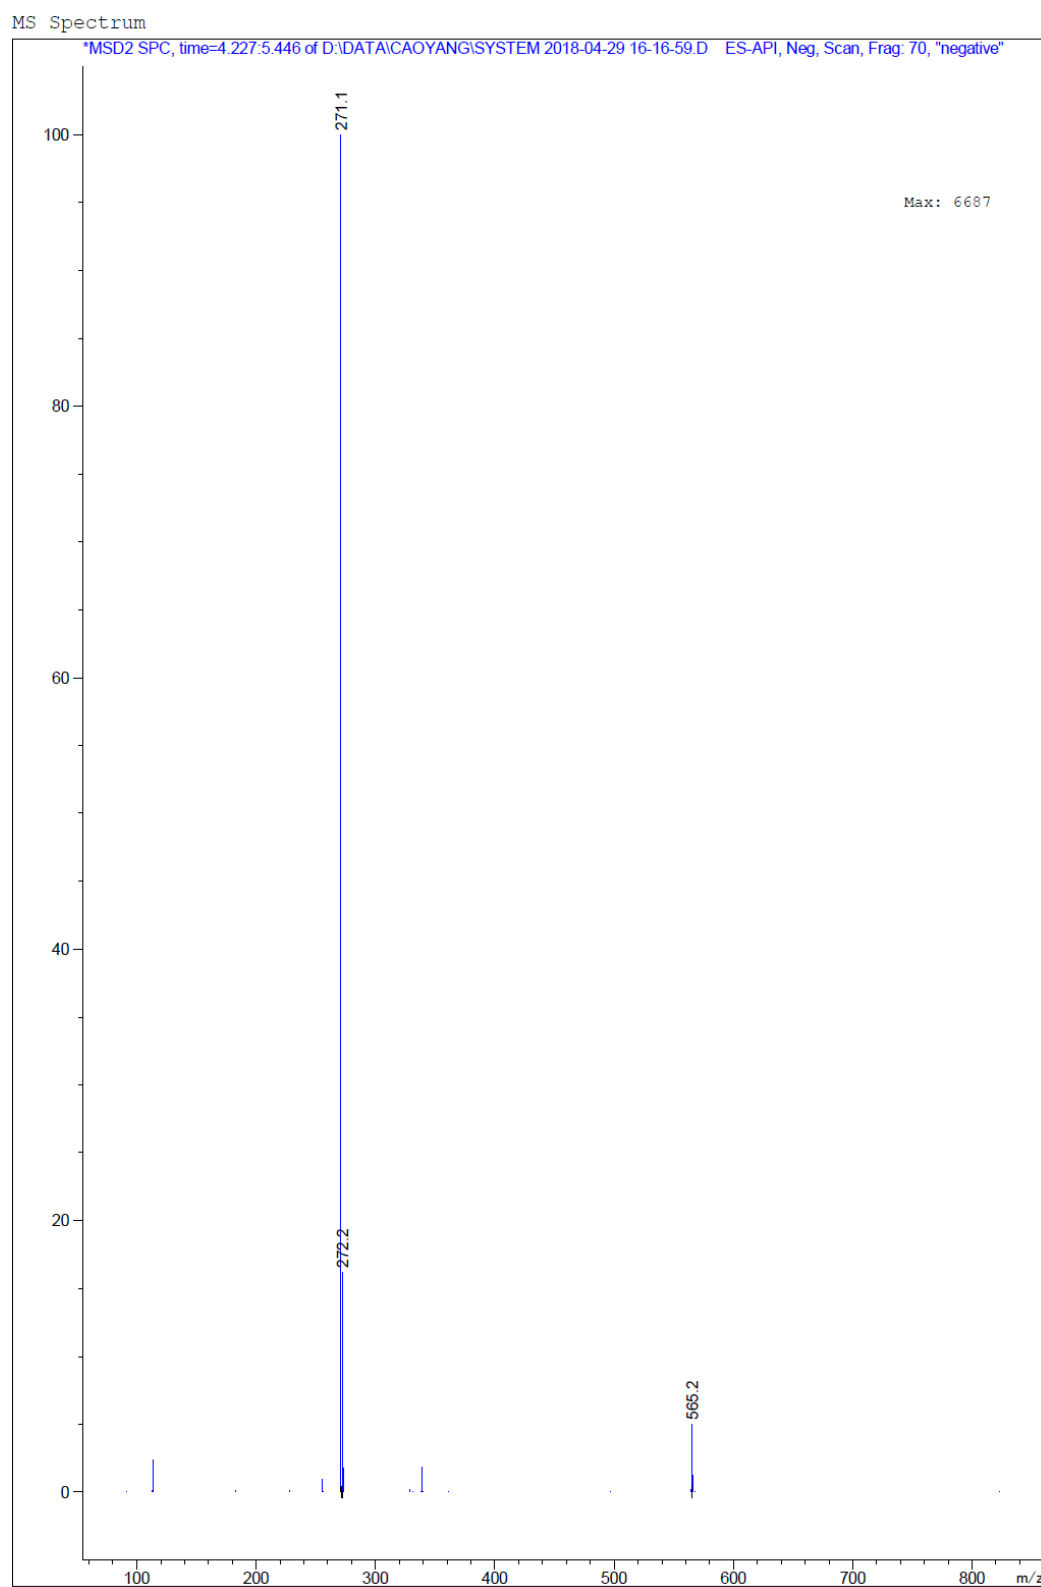

**Figure S86.** Mass spectrum (negative ionization) of **21f**

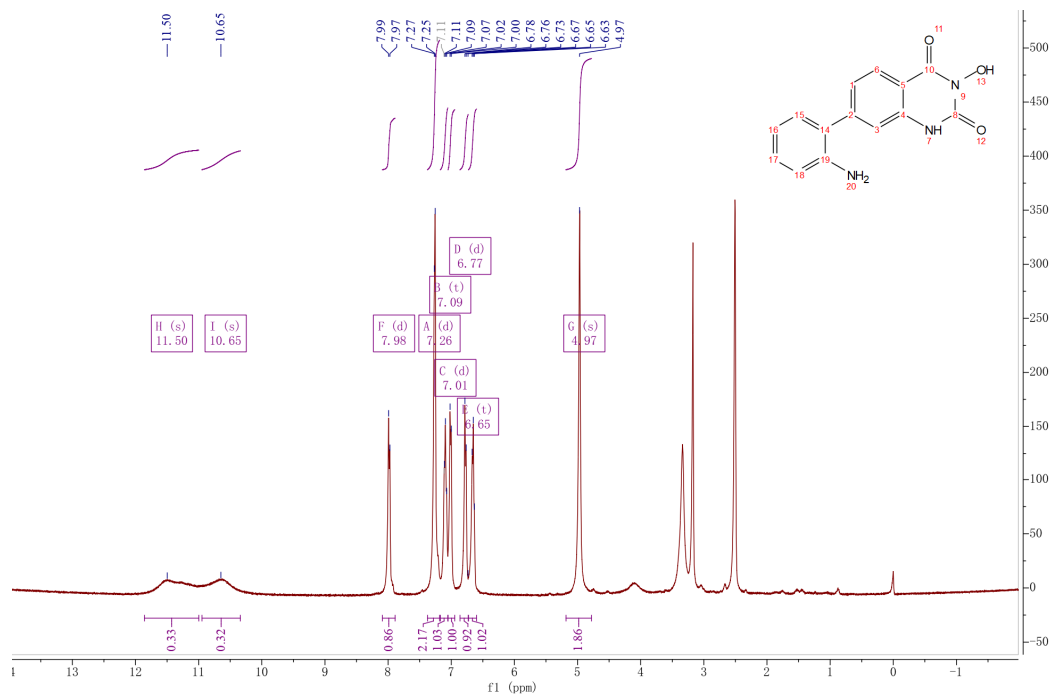

**Figure S87.**  $^1\text{H}$  NMR (400 MHz,  $\text{DMSO}-d_6$ ) spectrum of **21g**

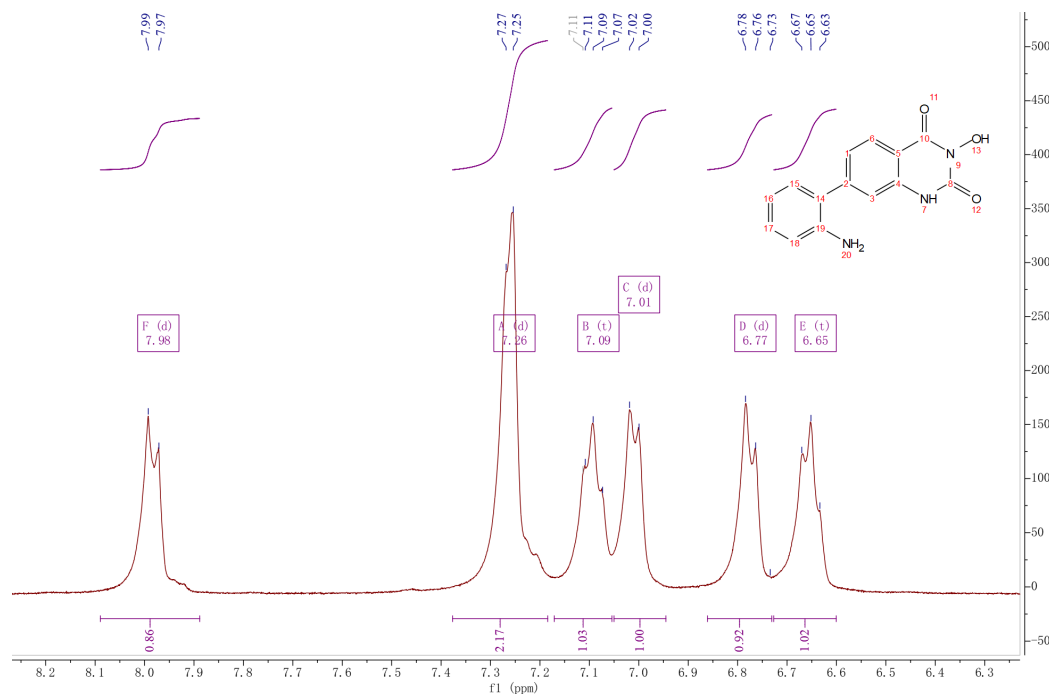

**Figure S88.** Magnified  $^1\text{H}$  NMR (400 MHz,  $\text{DMSO}-d_6$ ) spectrum fragments of **21g**

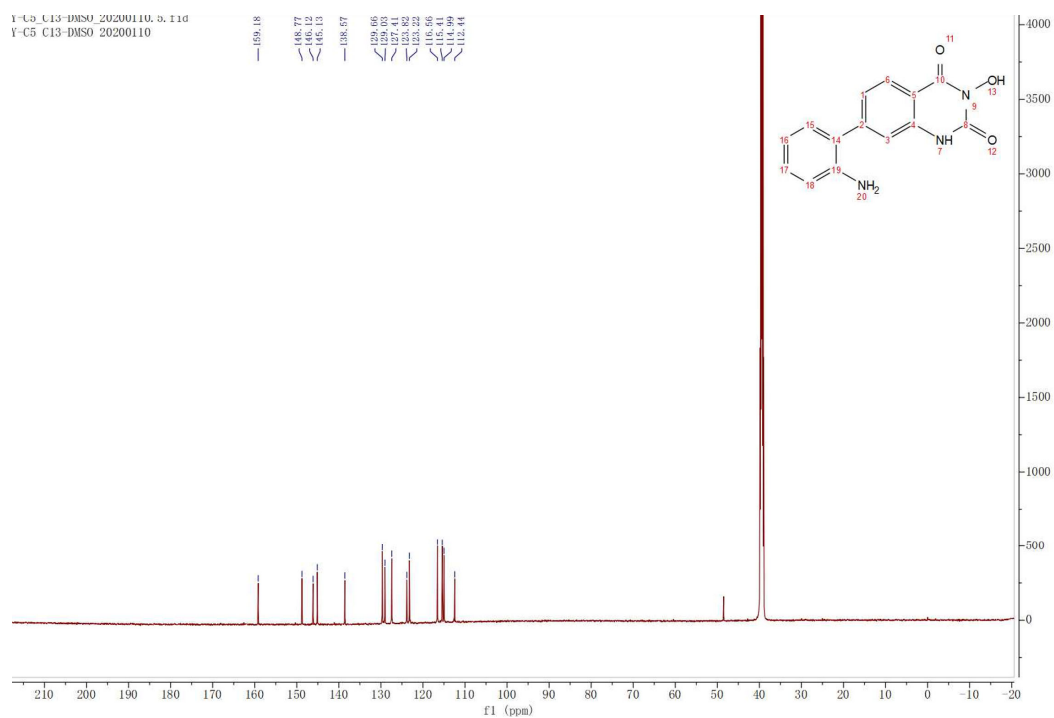

**Figure S89.**  $^{13}\text{C}$  NMR (151 MHz,  $\text{DMSO-}d_6$ ) spectrum of **21g**

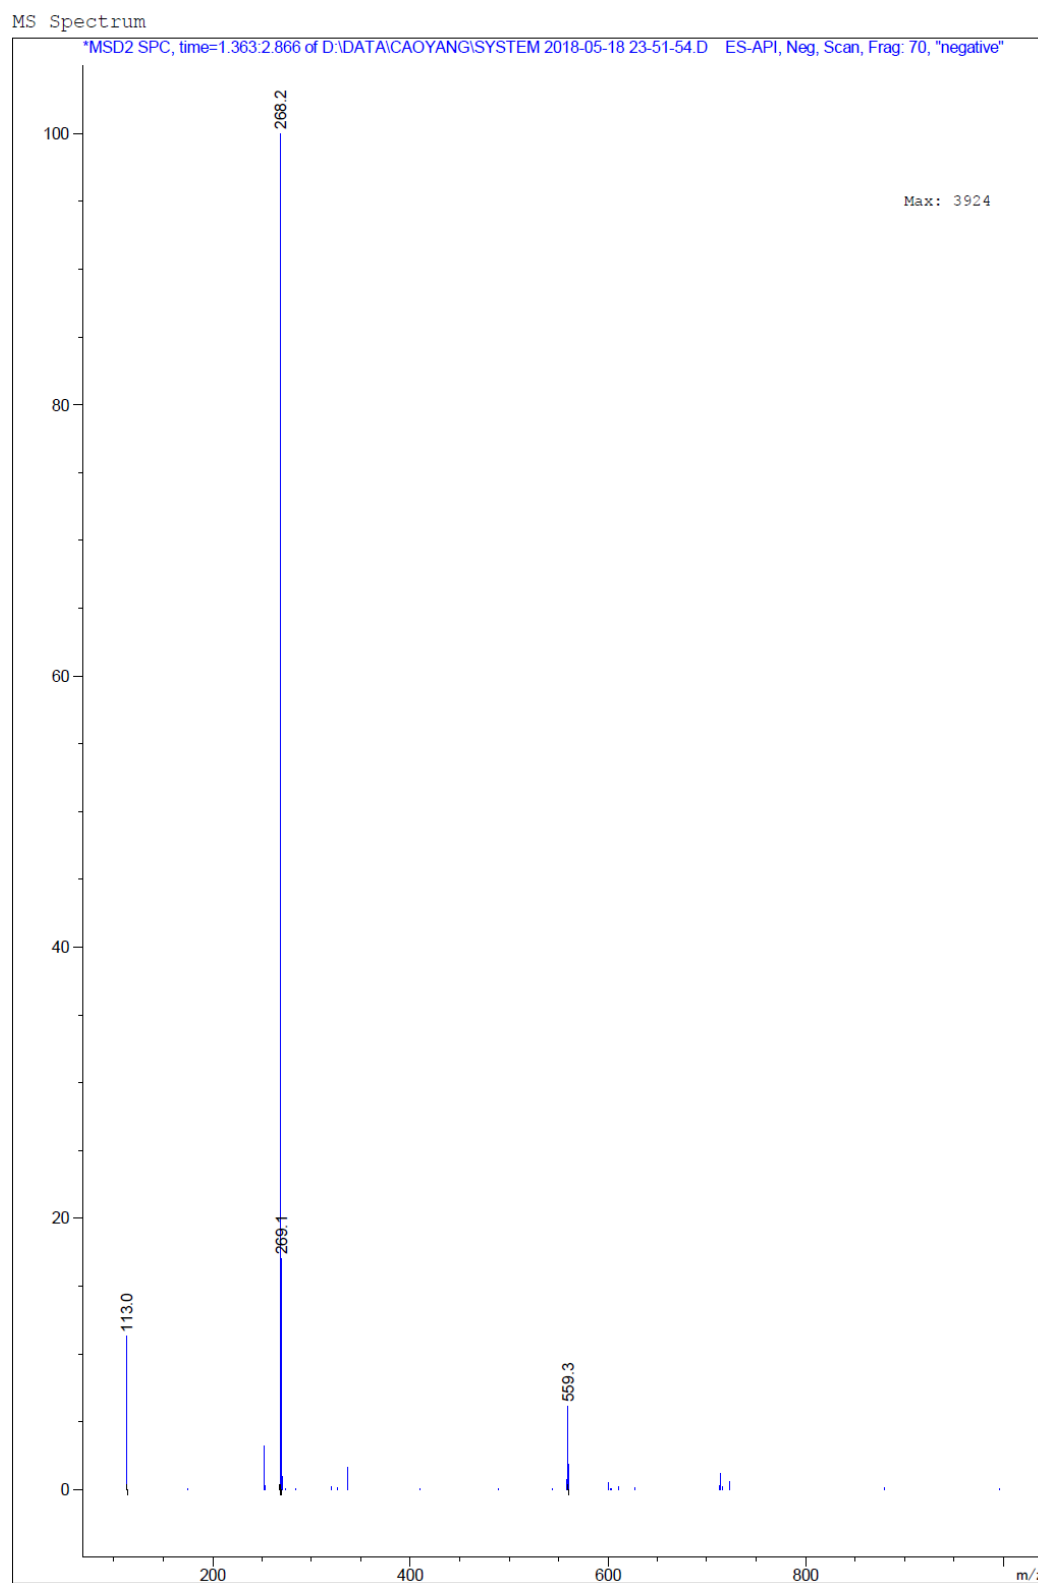

**Figure S90.** Mass spectrum (negative ionization) of **21g**

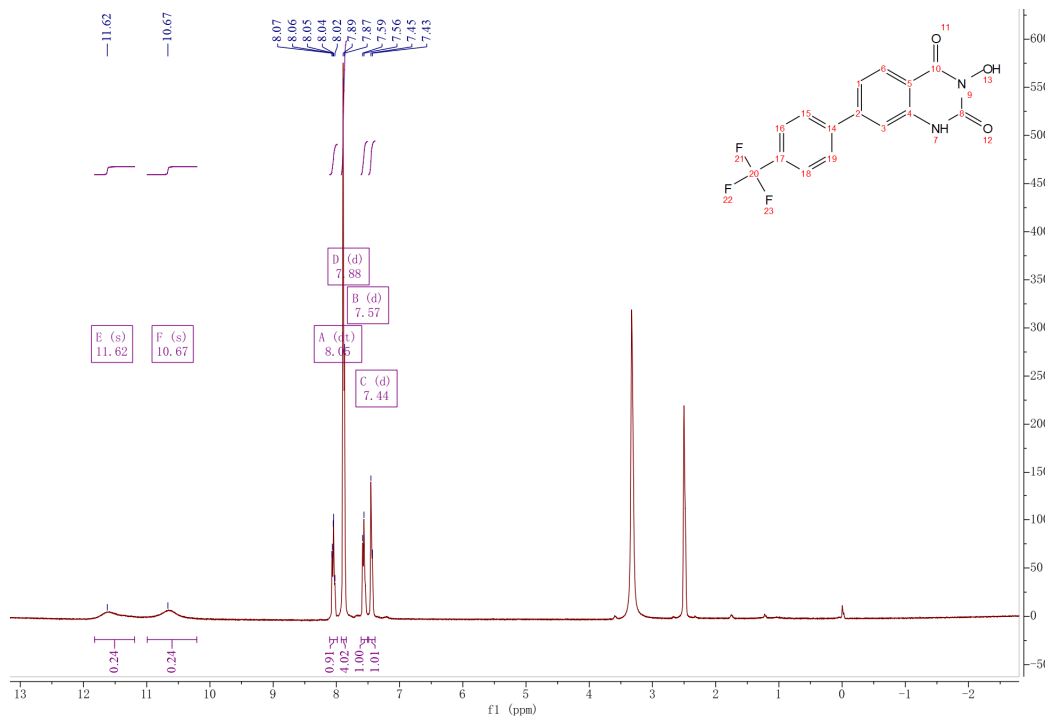

**Figure S91.**  $^1\text{H}$  NMR (400 MHz,  $\text{DMSO}-d_6$ ) spectrum of **21h**

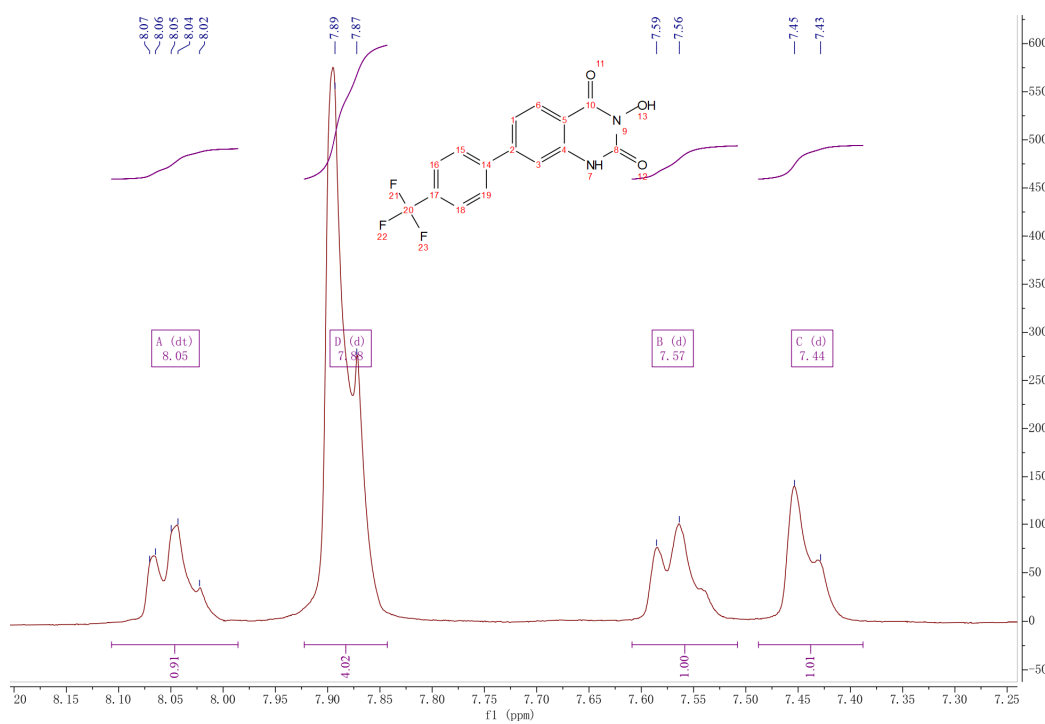

**Figure S92.** Magnified  $^1\text{H}$  NMR (400 MHz,  $\text{DMSO}-d_6$ ) spectrum fragments of **21h**



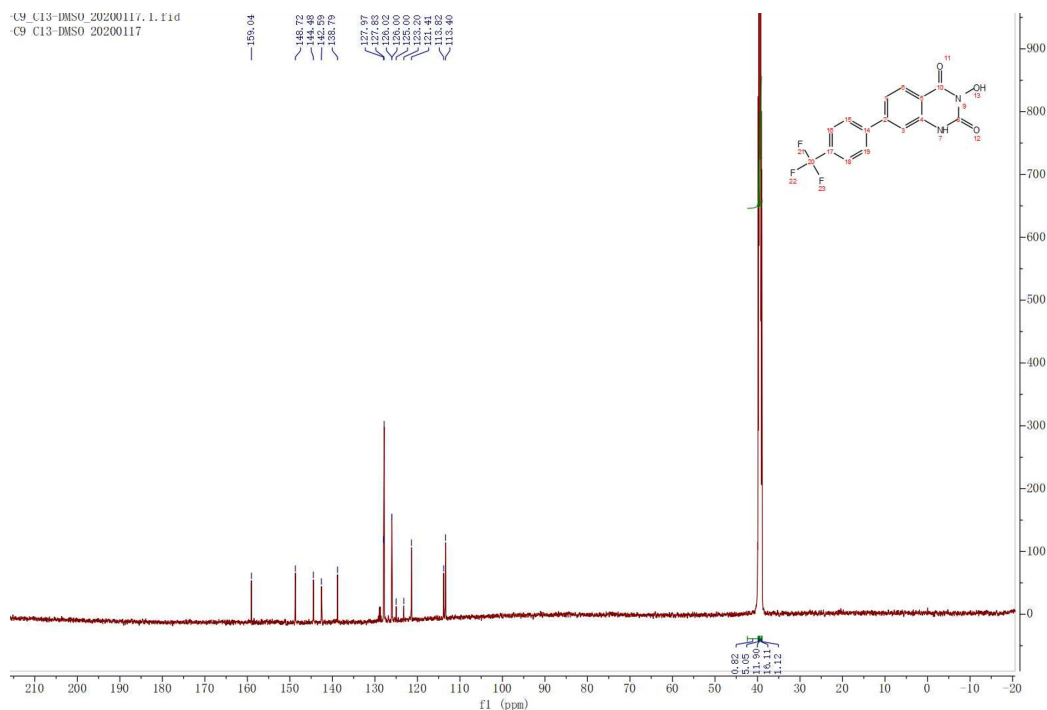

**Figure S93.**  $^{13}\text{C}$  NMR (151 MHz,  $\text{DMSO-}d_6$ ) spectrum of **21h**

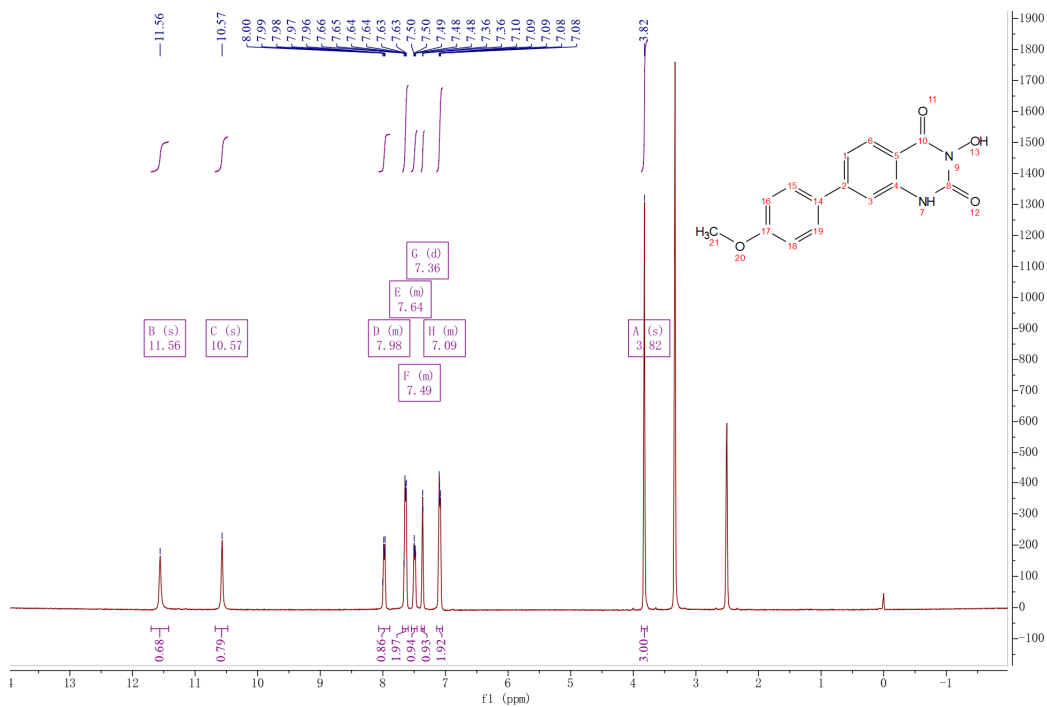

**Figure S94.**  $^1\text{H}$  NMR (400 MHz,  $\text{DMSO-}d_6$ ) spectrum of **21i**

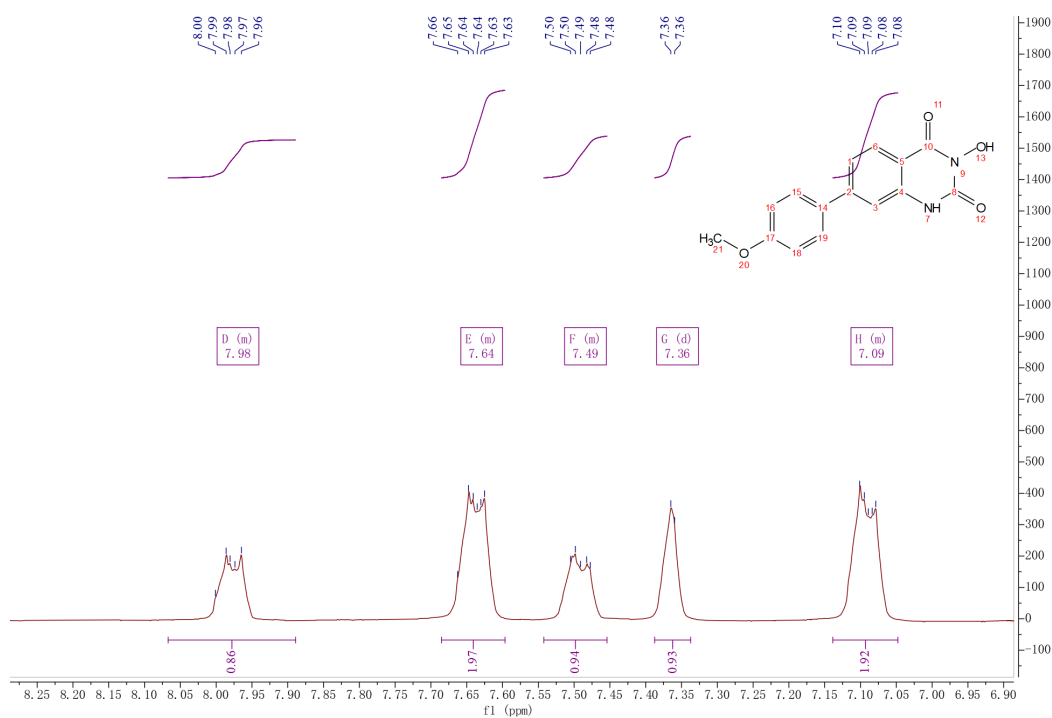

**Figure S95.** Magnified  $^1\text{H}$  NMR (400 MHz,  $\text{DMSO}-d_6$ ) spectrum fragments of **21i**

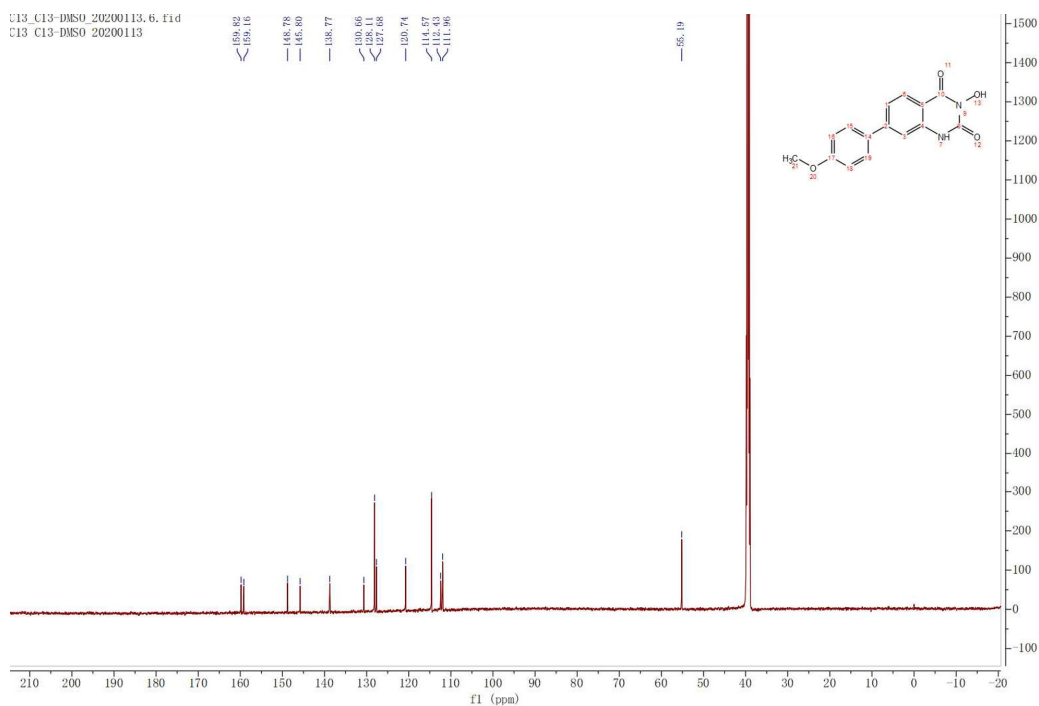

**Figure S96.**  $^{13}\text{C}$  NMR (151 MHz,  $\text{DMSO}-d_6$ ) spectrum of **21i**

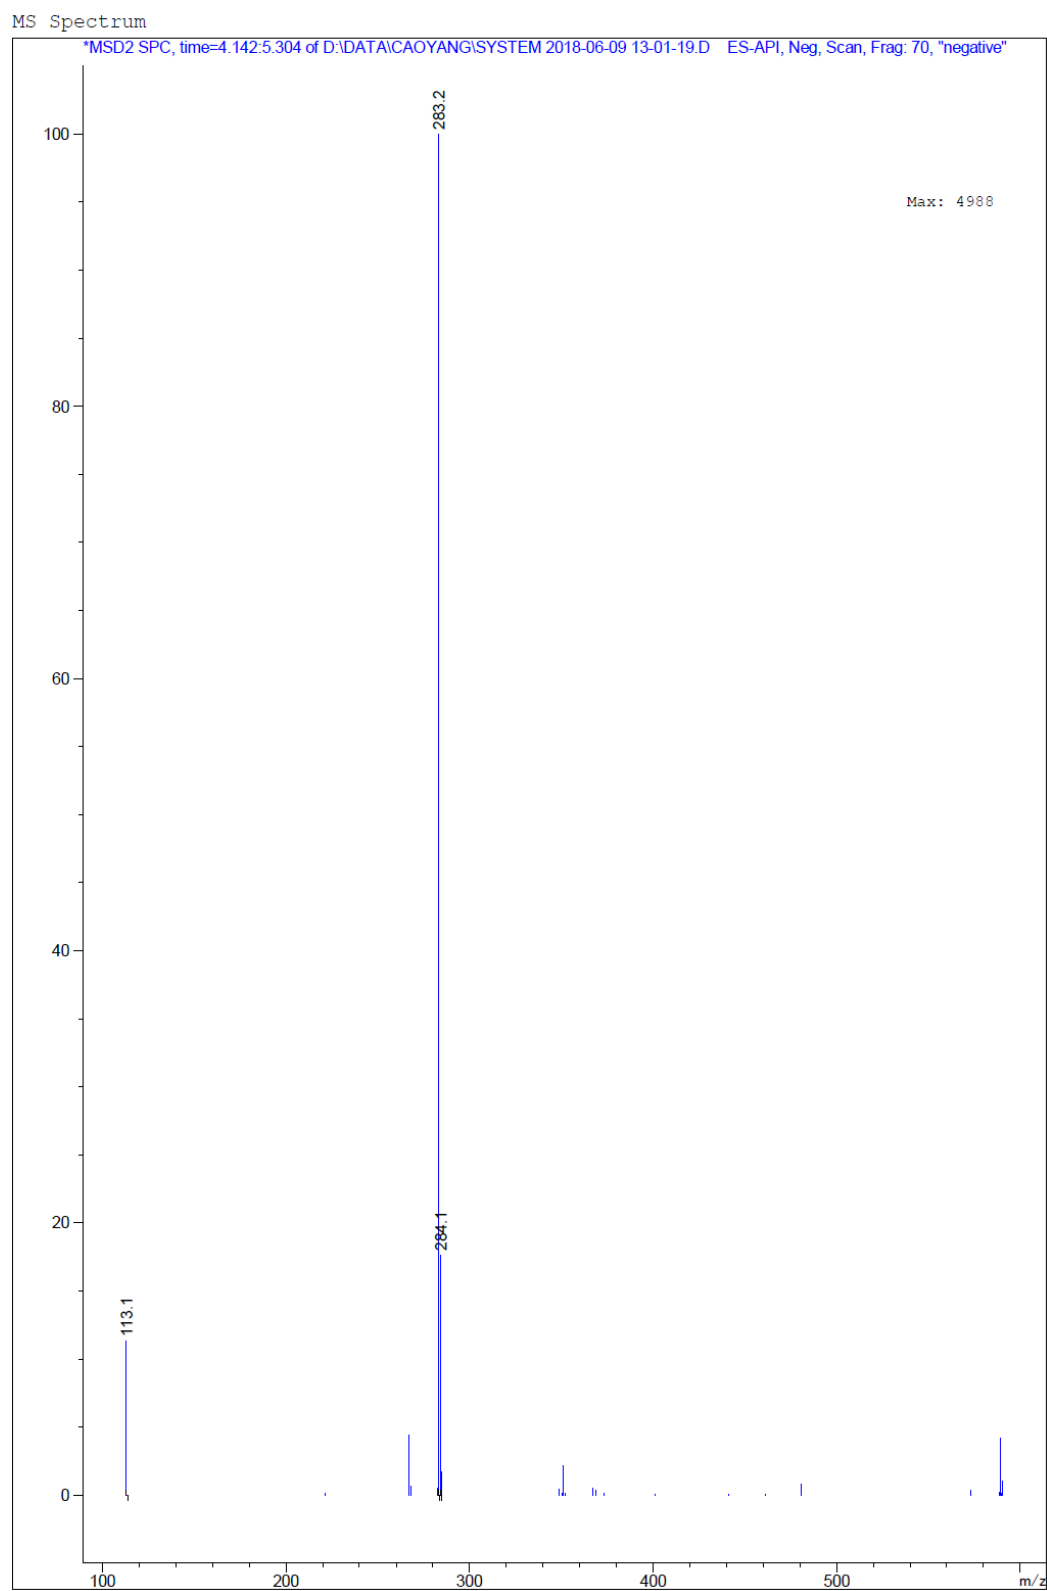

**Figure S97.** Mass spectrum (negative ionization) of **21i**

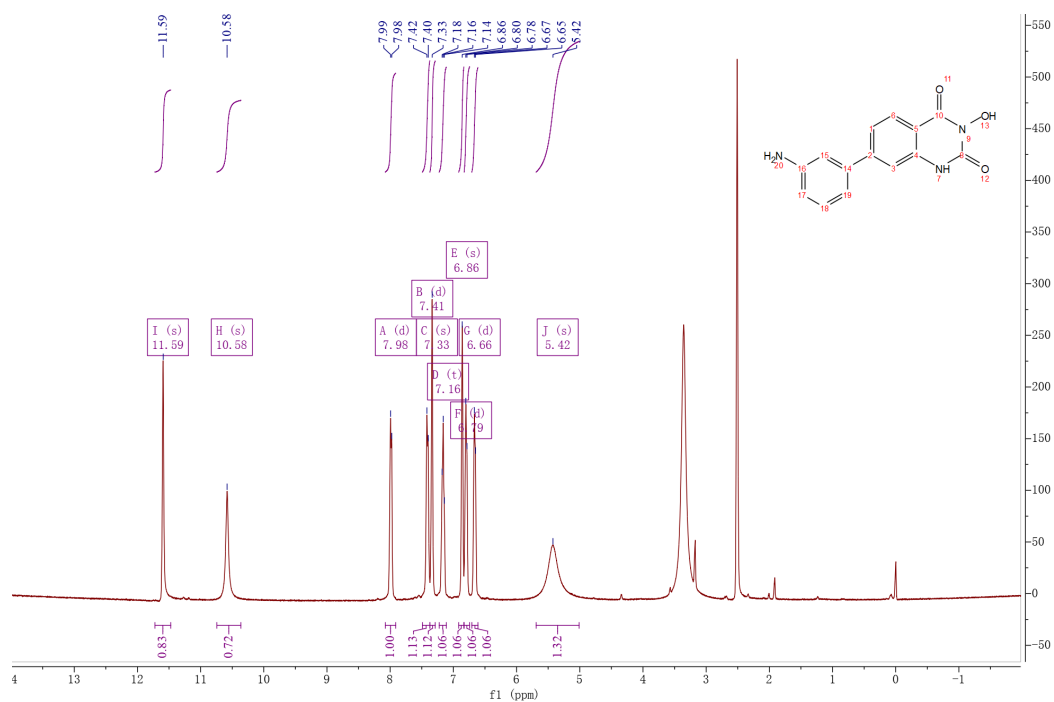

**Figure S98.**  $^1\text{H}$  NMR (400 MHz,  $\text{DMSO}-d_6$ ) spectrum of **21j**

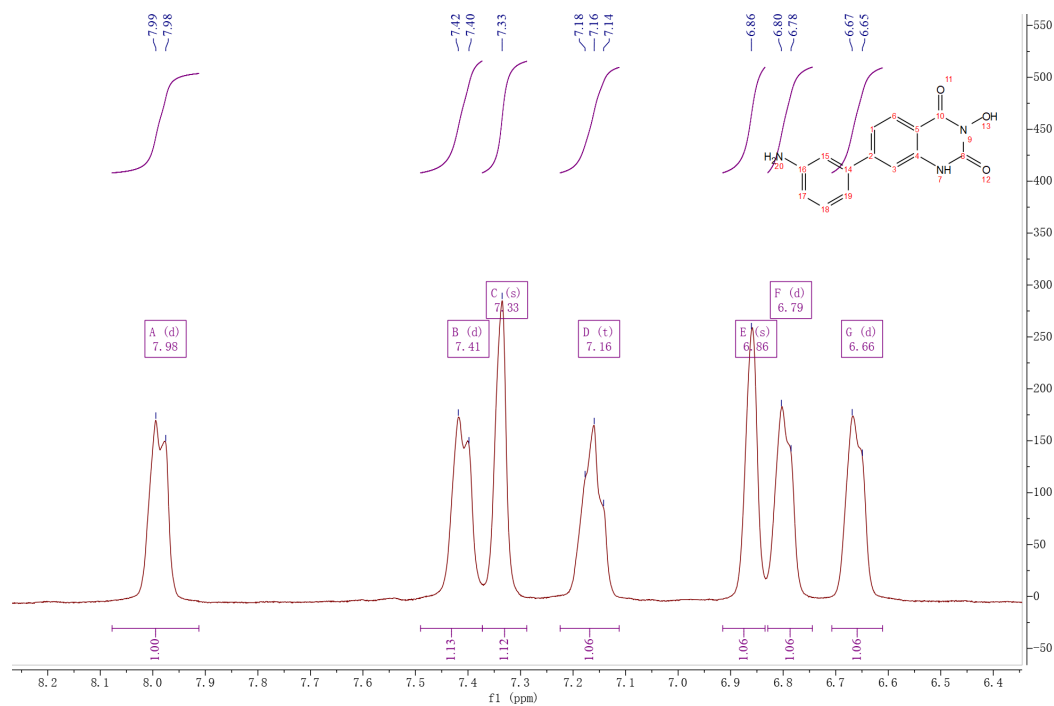

**Figure S99.** Magnified  $^1\text{H}$  NMR (400 MHz,  $\text{DMSO}-d_6$ ) spectrum fragments of **21j**

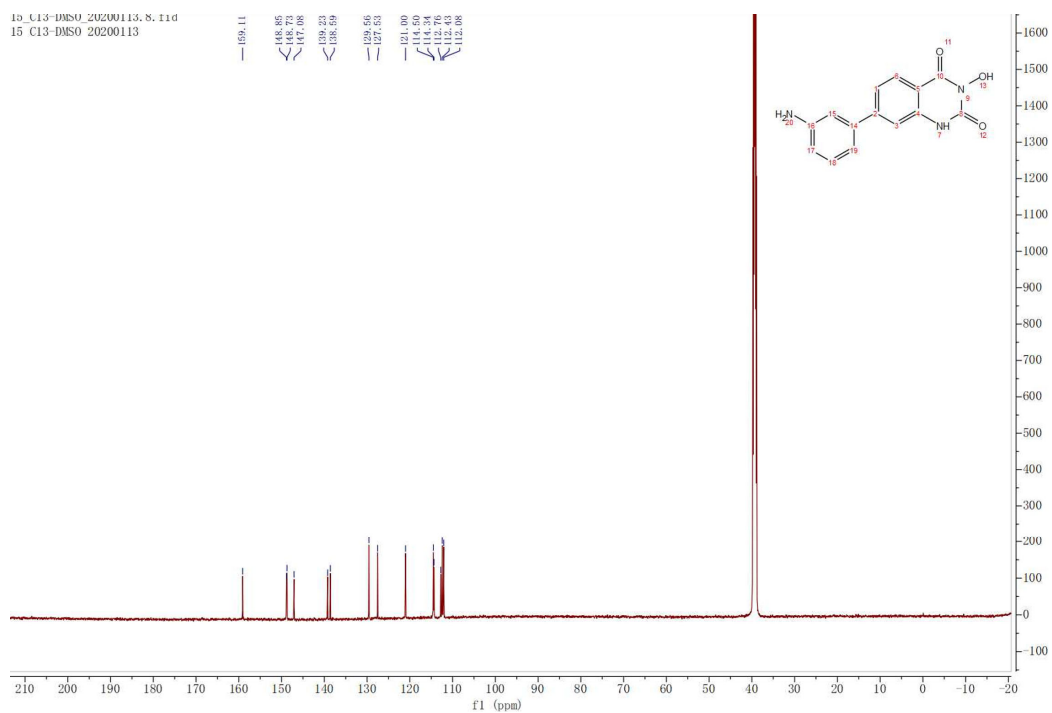

**Figure S100.**  $^{13}\text{C}$  NMR (151 MHz,  $\text{DMSO}-d_6$ ) spectrum of **21j**

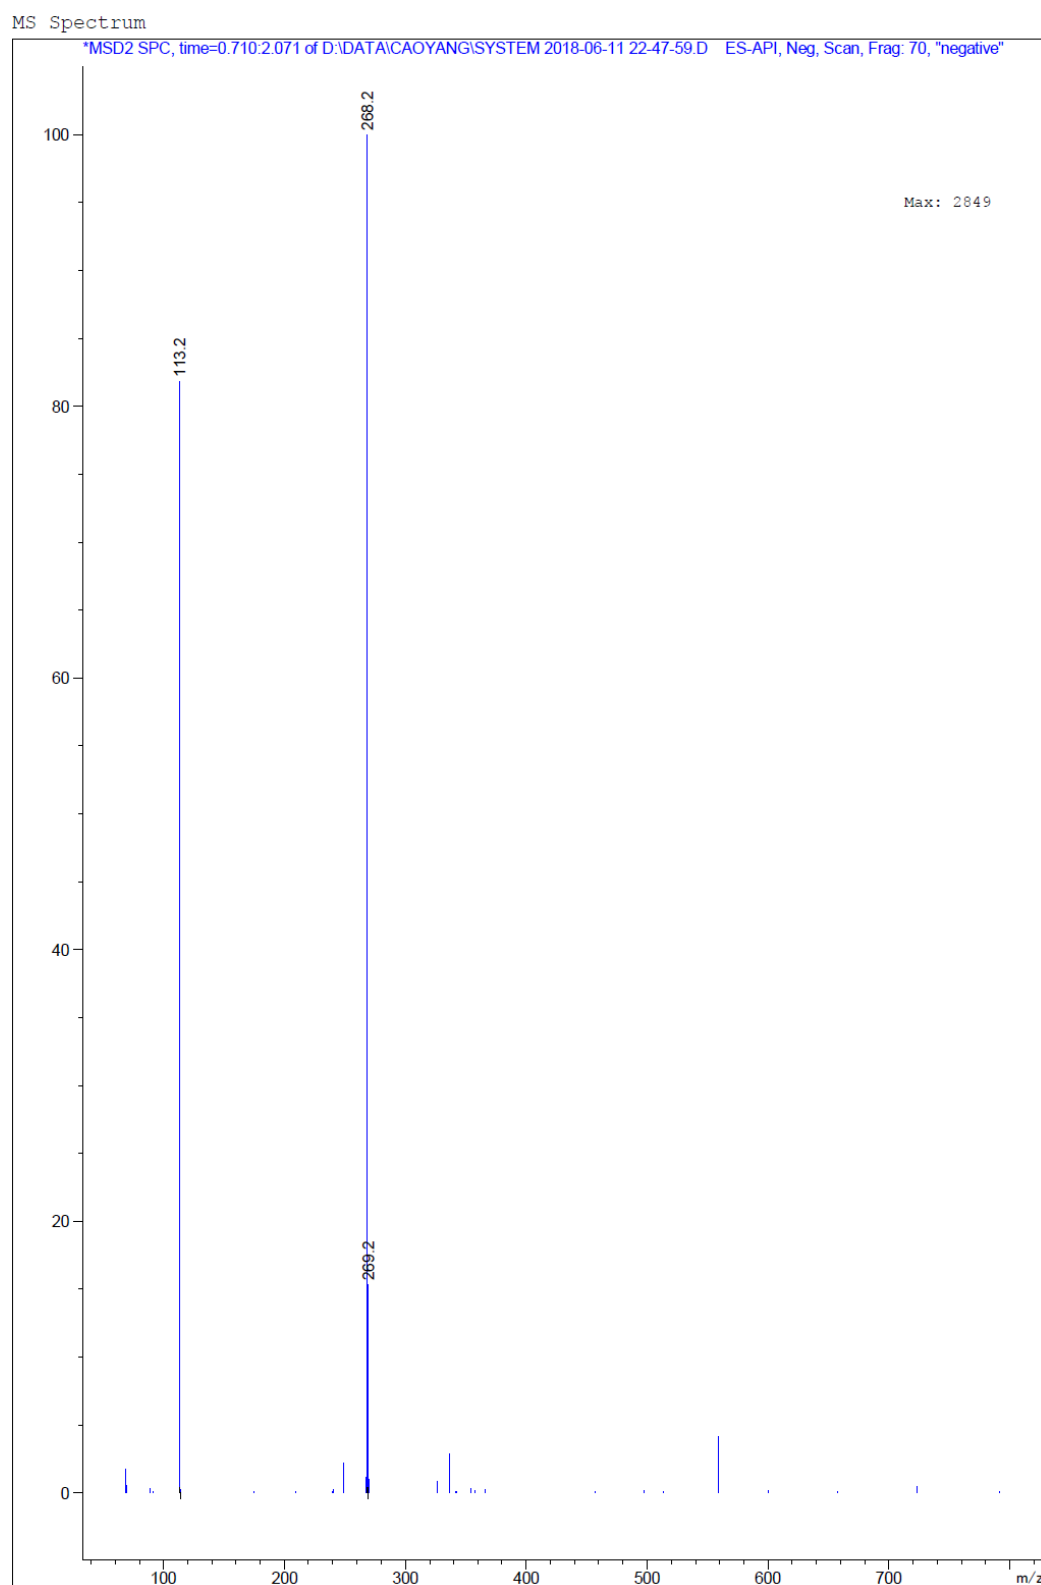

**Figure S101.** Mass spectrum (negative ionization) of **21j**

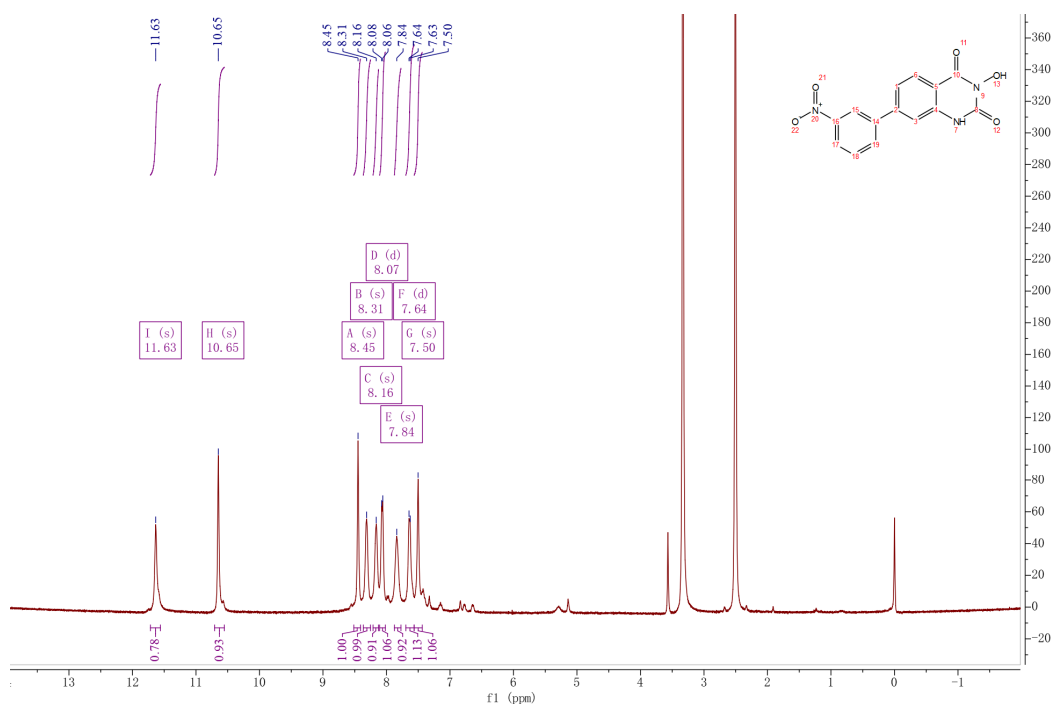

**Figure S102.**  $^1\text{H}$  NMR (400 MHz,  $\text{DMSO}-d_6$ ) spectrum of **21k**

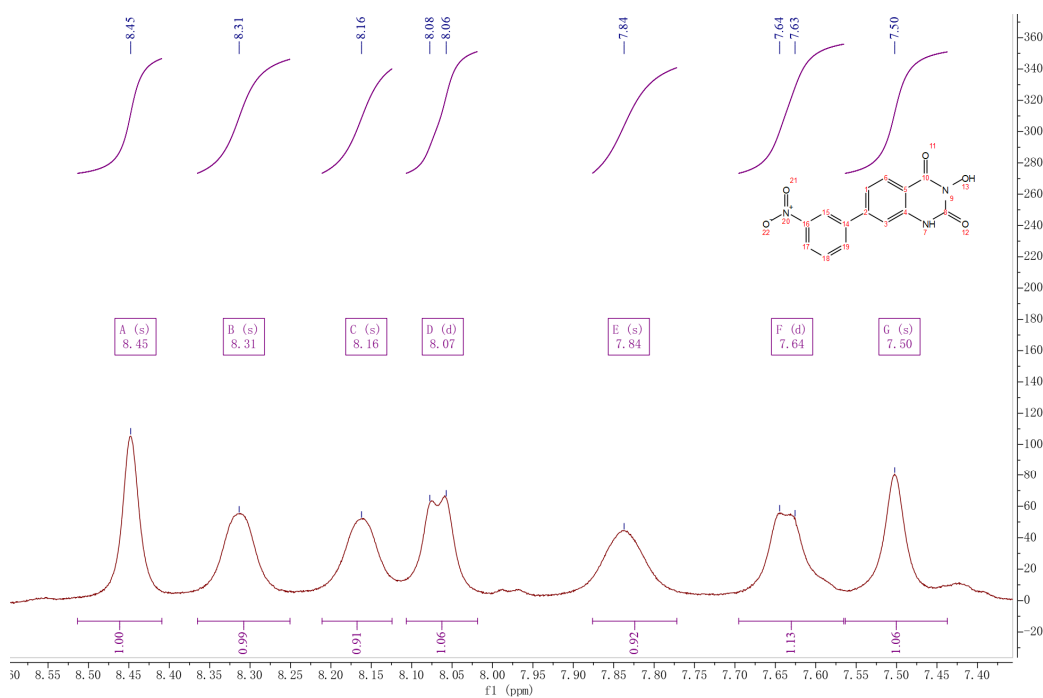

**Figure S103.** Magnified  $^1\text{H}$  NMR (400 MHz,  $\text{DMSO}-d_6$ ) spectrum fragments of **21k**

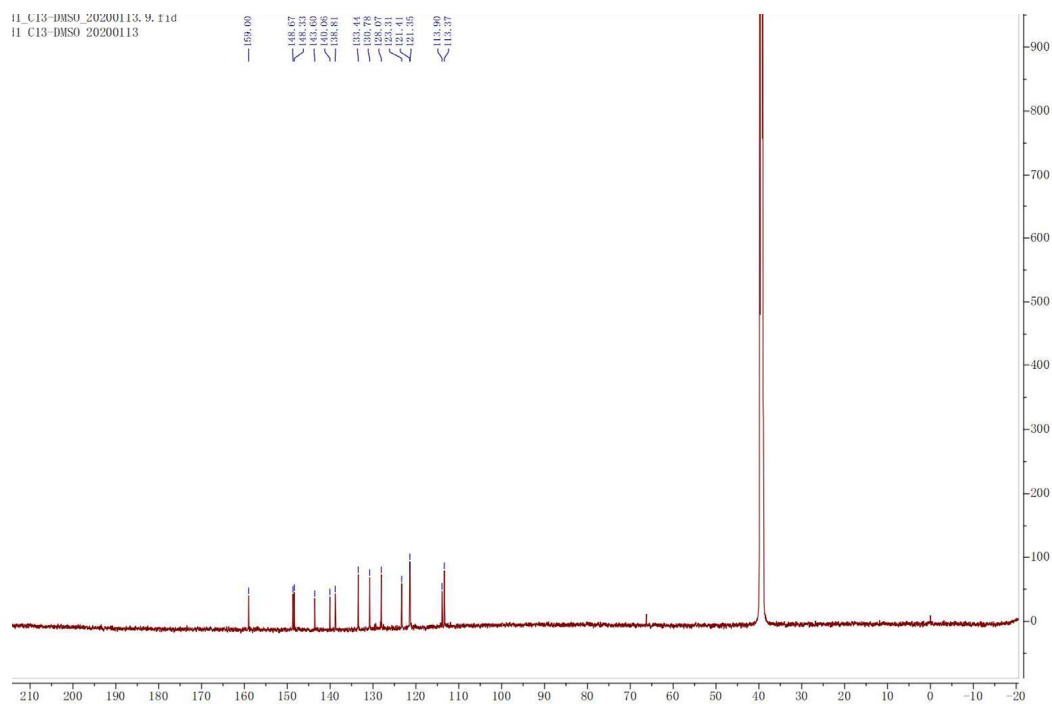

**Figure S104.**  $^{13}\text{C}$  NMR (151 MHz,  $\text{DMSO-}d_6$ ) spectrum of **21k**



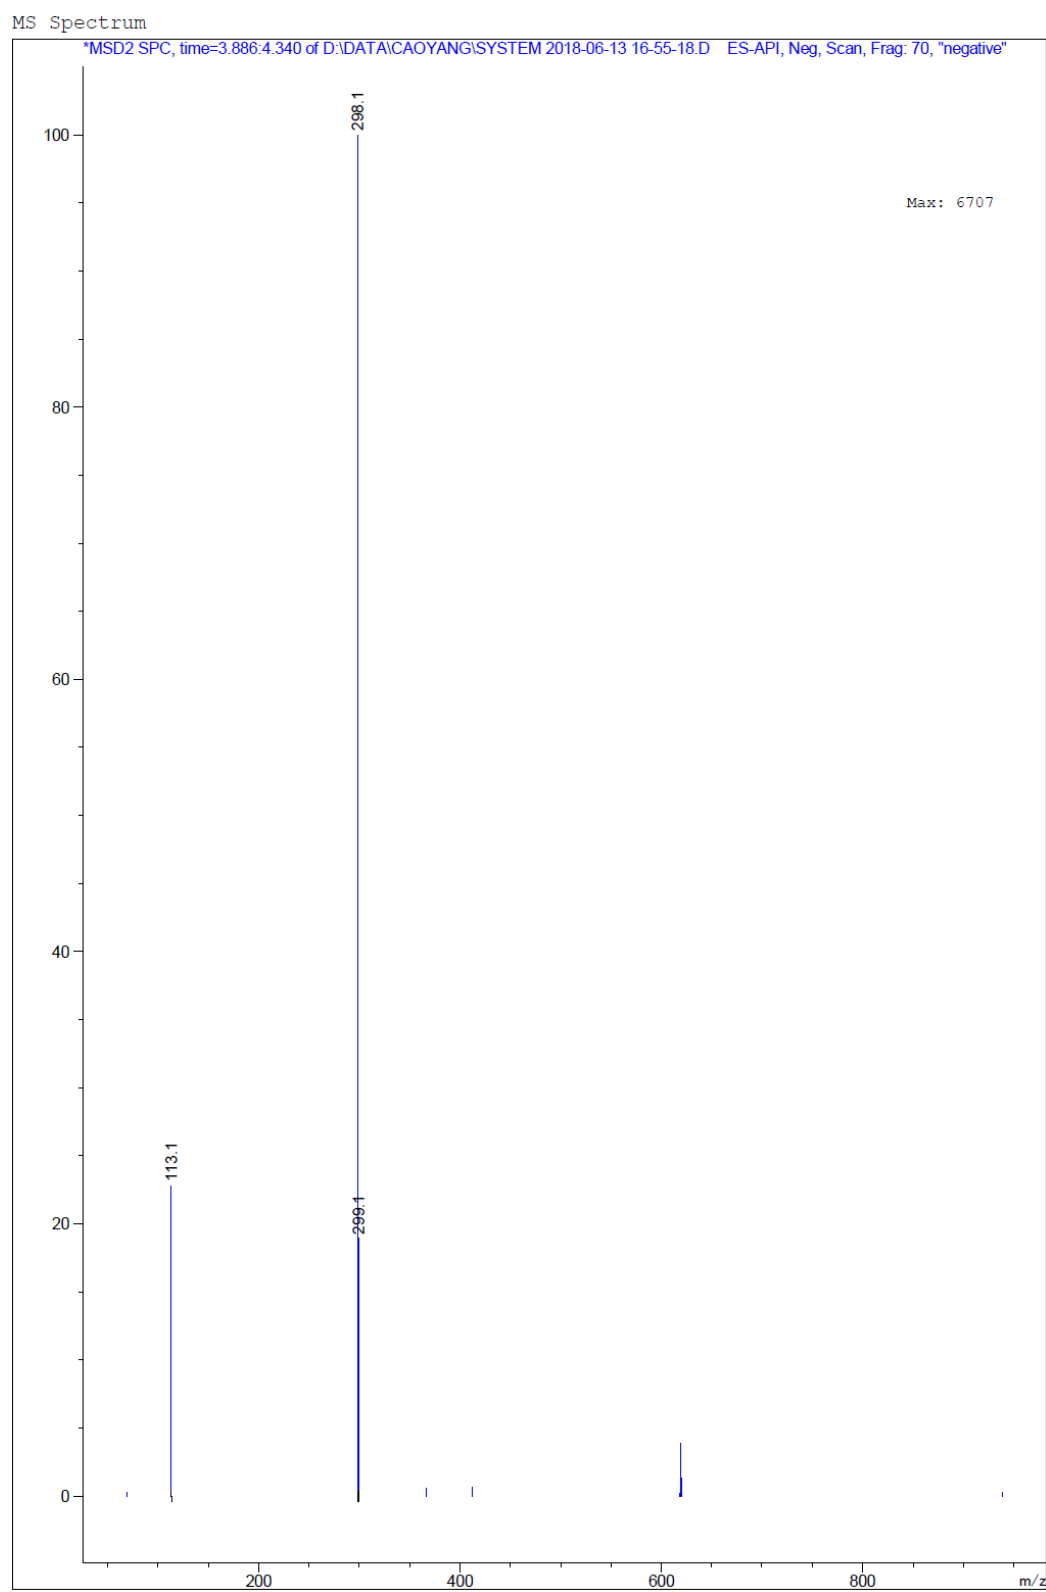

**Figure S105.** Mass spectrum (negative ionization) of **21k**

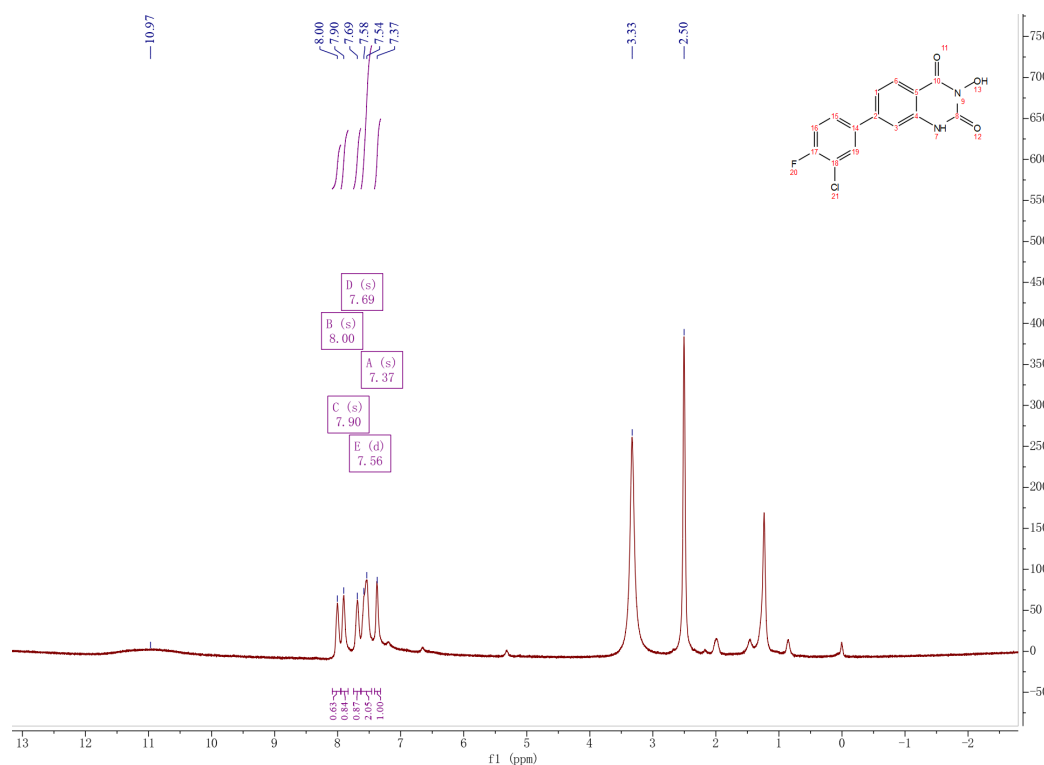

**Figure S106.**  $^1\text{H}$  NMR (400 MHz,  $\text{DMSO}-d_6$ ) spectrum of **211**

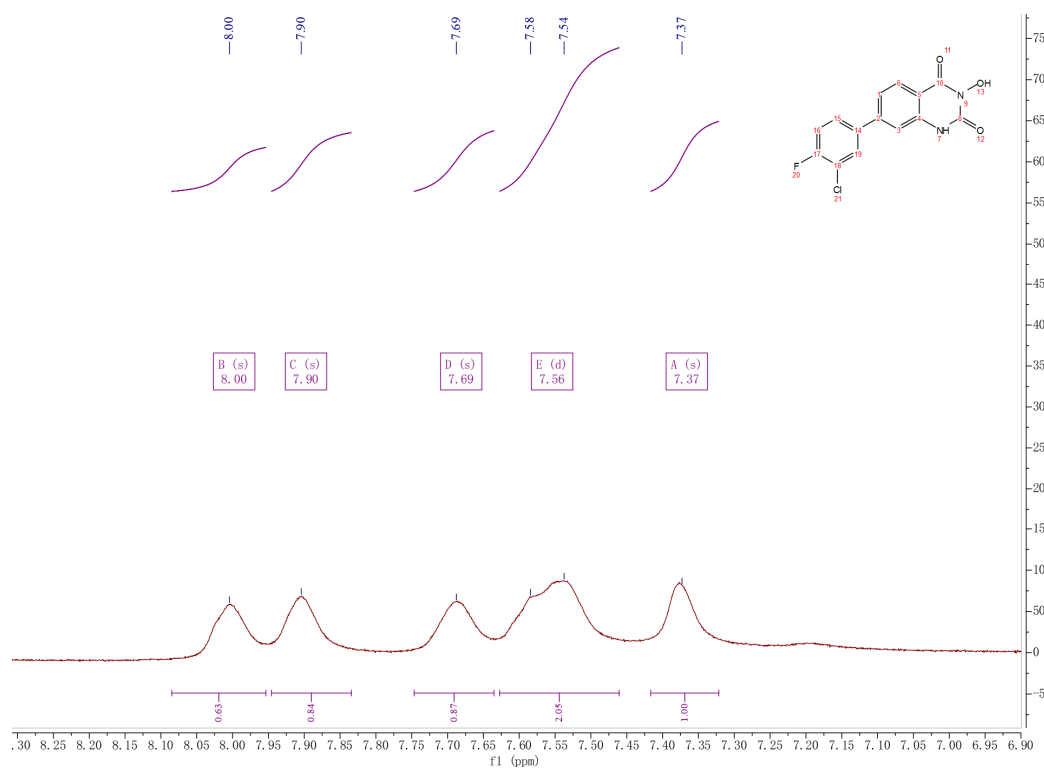

**Figure S107.** Magnified  $^1\text{H}$  NMR (400 MHz,  $\text{DMSO}-d_6$ ) spectrum fragments of **211**

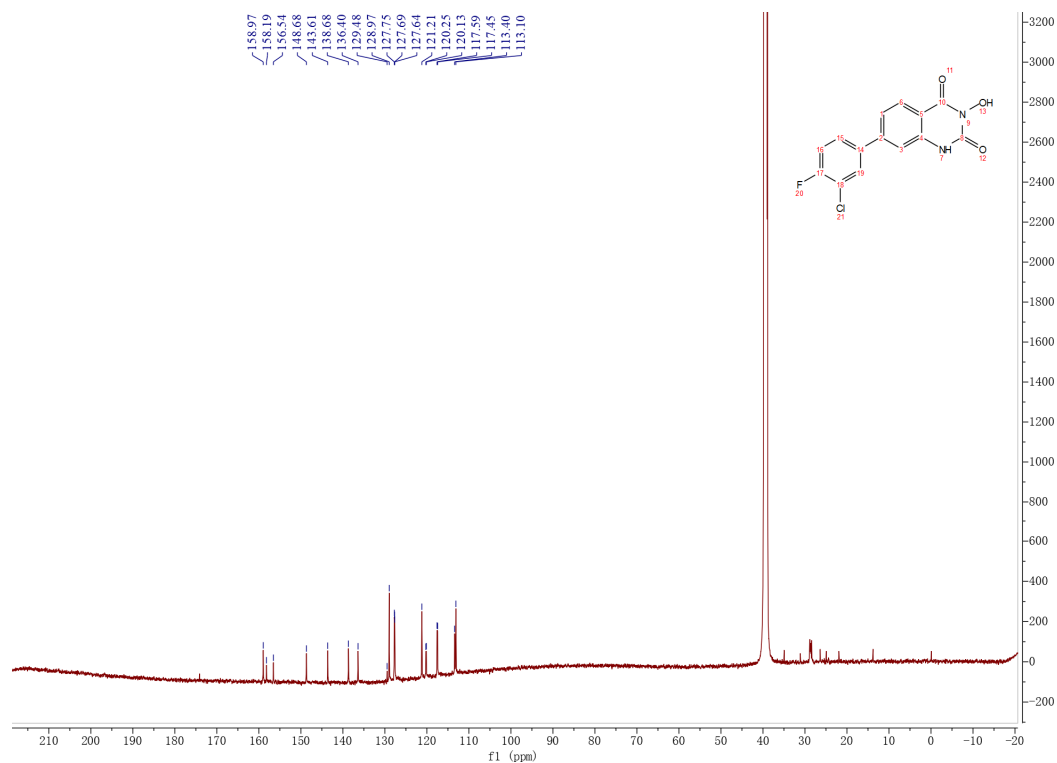

**Figure S108.** <sup>13</sup>C NMR (151 MHz, DMSO-*d*<sub>6</sub>) spectrum of **21l**

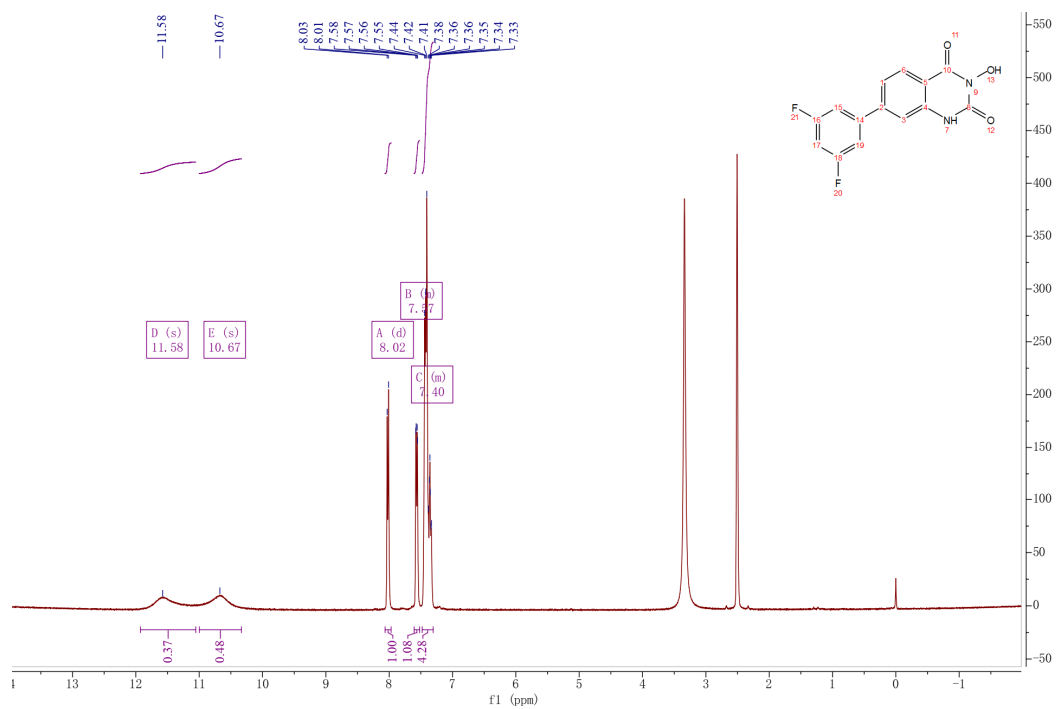

**Figure S109.** <sup>1</sup>H NMR (400 MHz, DMSO-*d*<sub>6</sub>) spectrum of **21m**

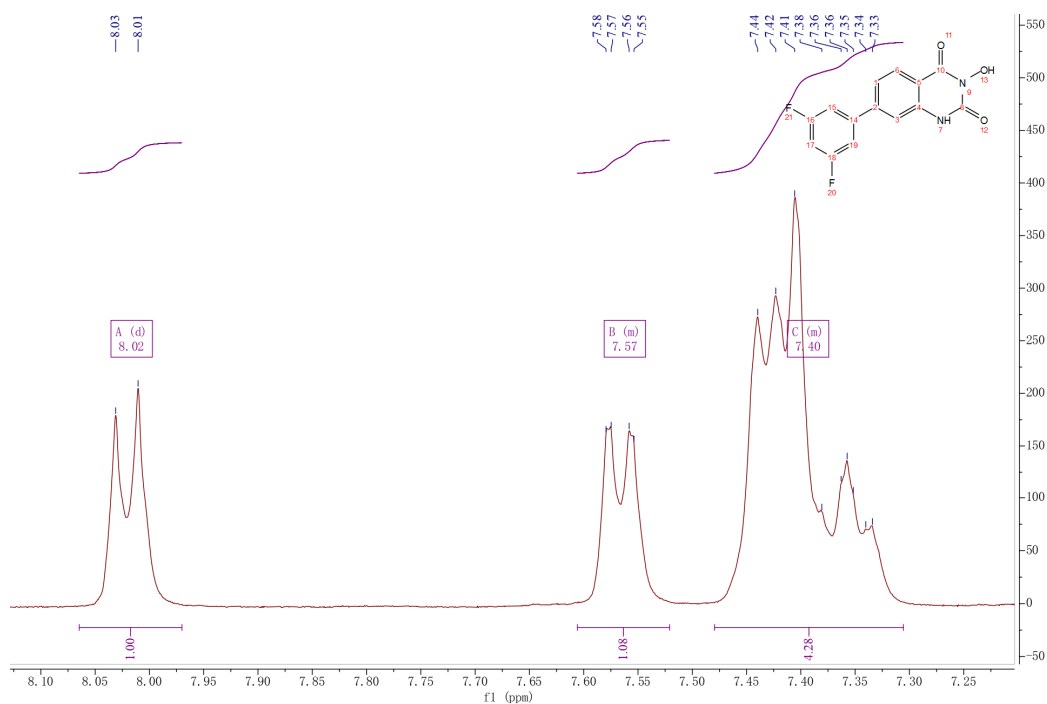

**Figure S110.** Magnified  $^1\text{H}$  NMR (400 MHz,  $\text{DMSO}-d_6$ ) spectrum fragments of **21m**

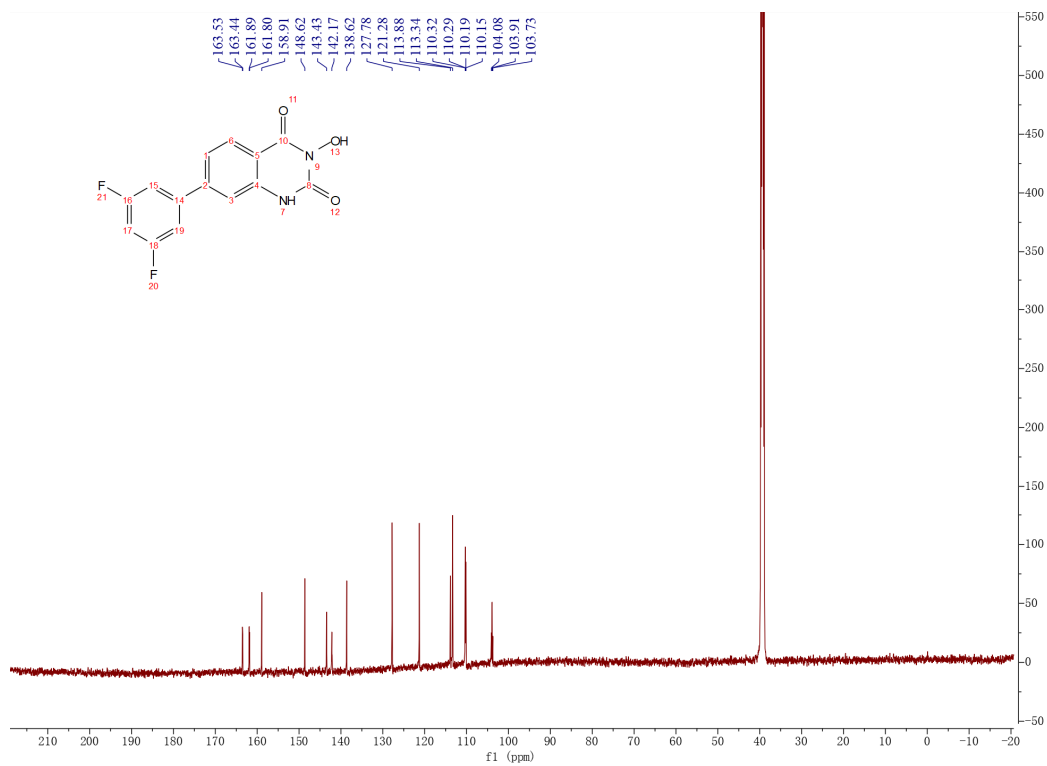

**Figure S111.**  $^{13}\text{C}$  NMR (151 MHz,  $\text{DMSO}-d_6$ ) spectrum of **21m**

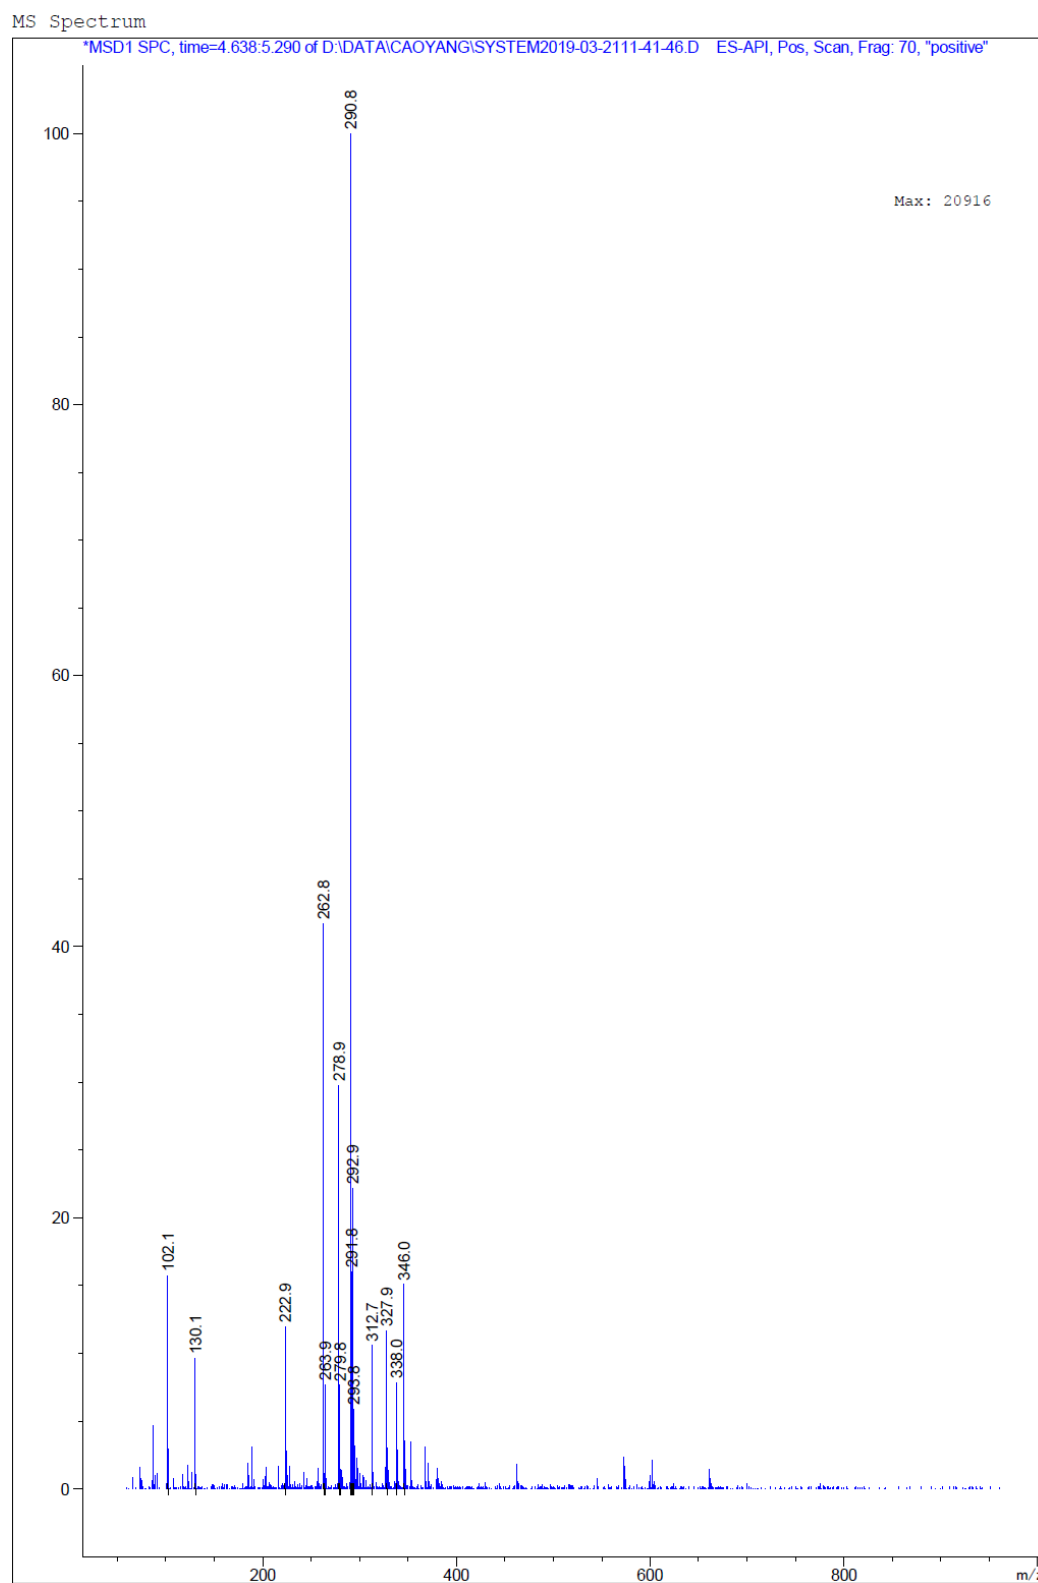

**Figure S112.** Mass spectrum (positive ionization) of **21m**

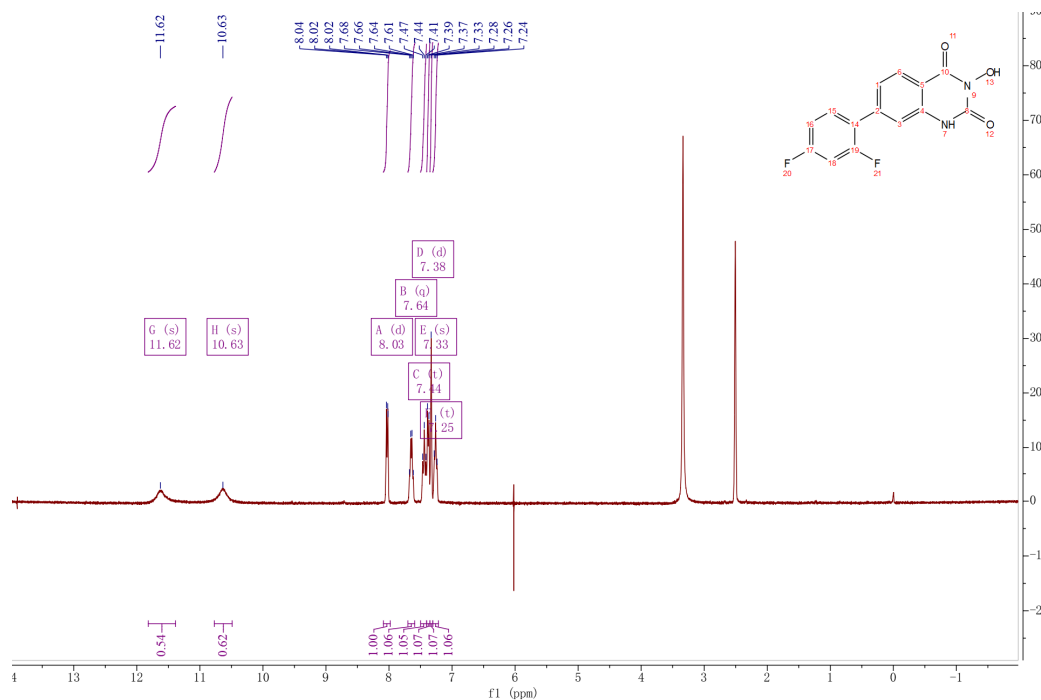

**Figure S113.**  $^1\text{H}$  NMR (400 MHz,  $\text{DMSO}-d_6$ ) spectrum of **21n**

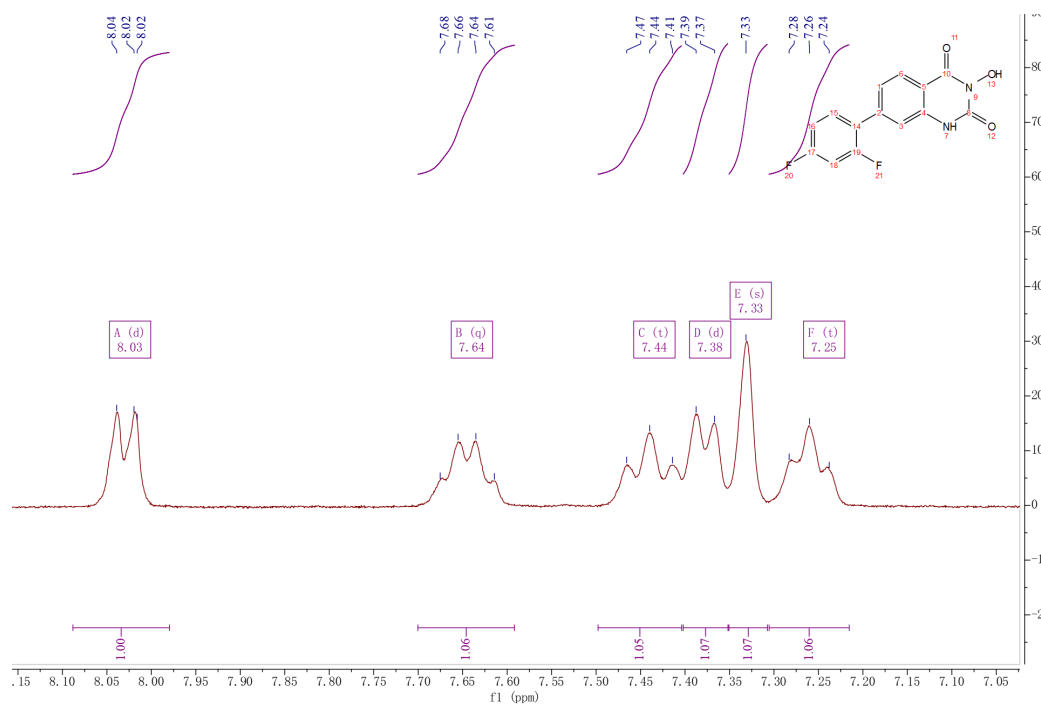

**Figure S114.** Magnified  $^1\text{H}$  NMR (400 MHz,  $\text{DMSO}-d_6$ ) spectrum fragments of **21n**

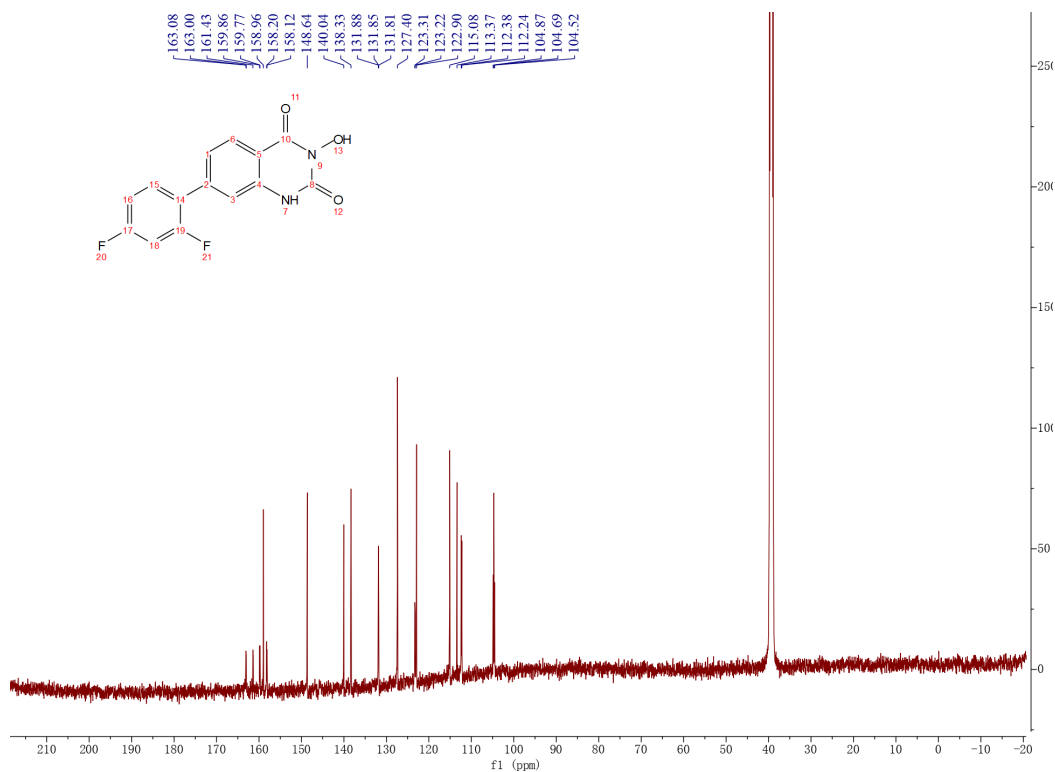

**Figure S115.**  $^{13}\text{C}$  NMR (151 MHz, DMSO- $d_6$ ) spectrum of **21n**

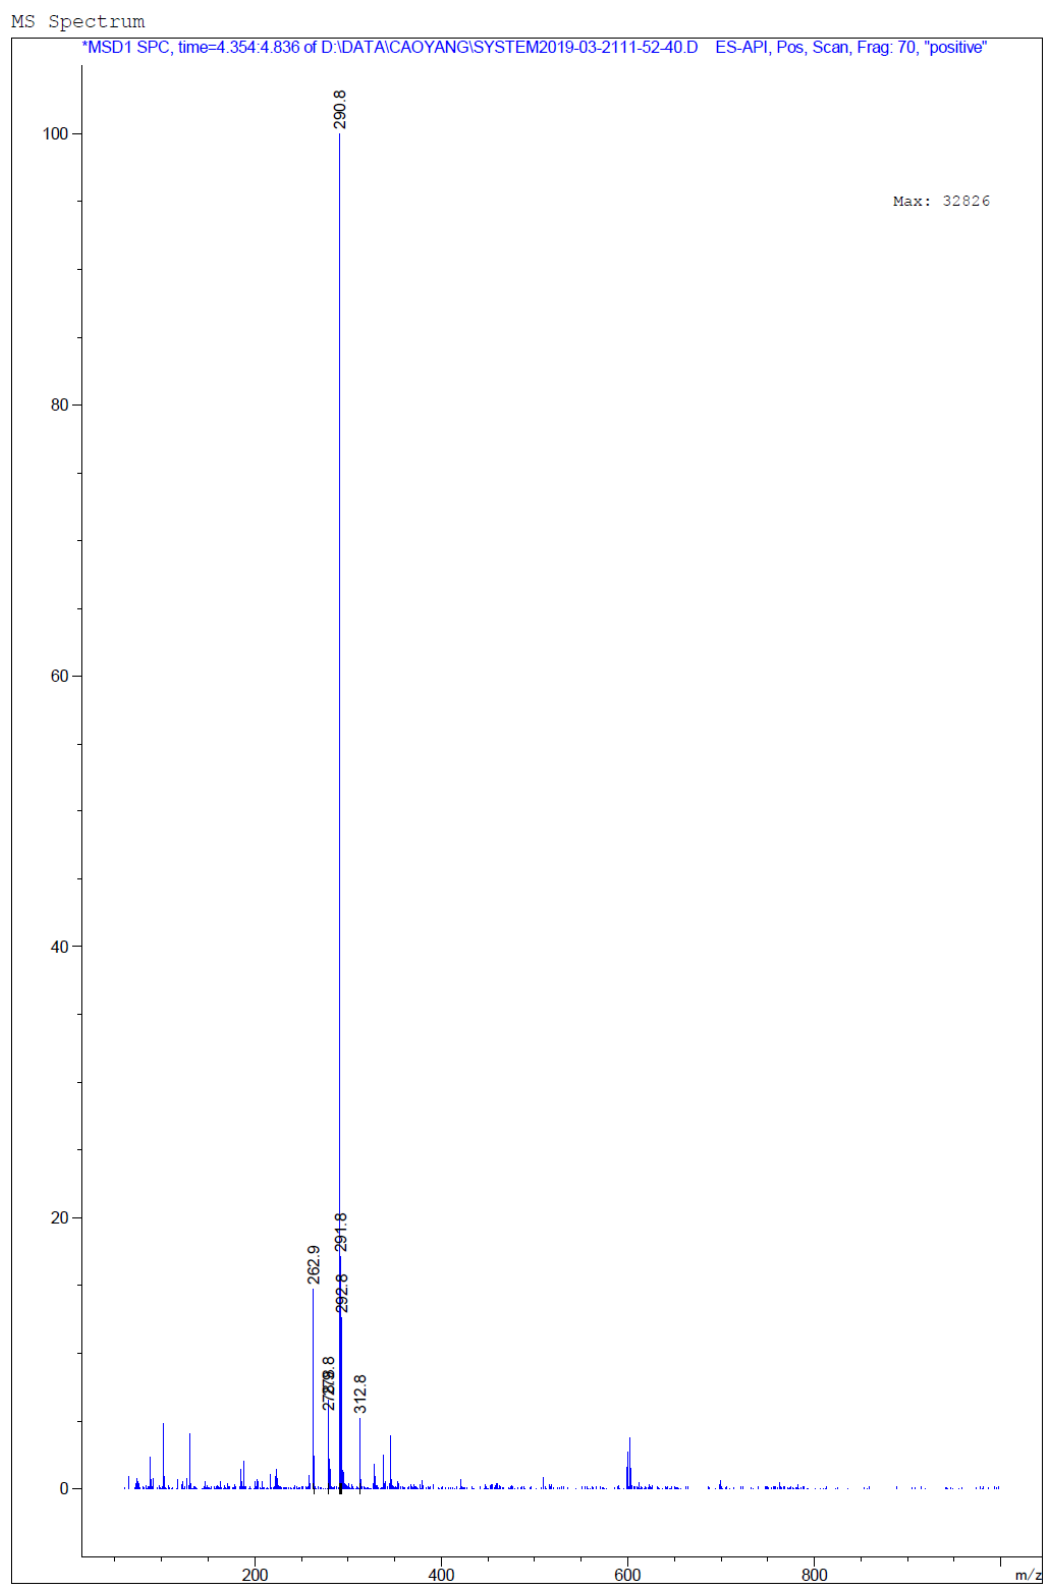

**Figure S116.** Mass spectrum (positive ionization) of **21n**



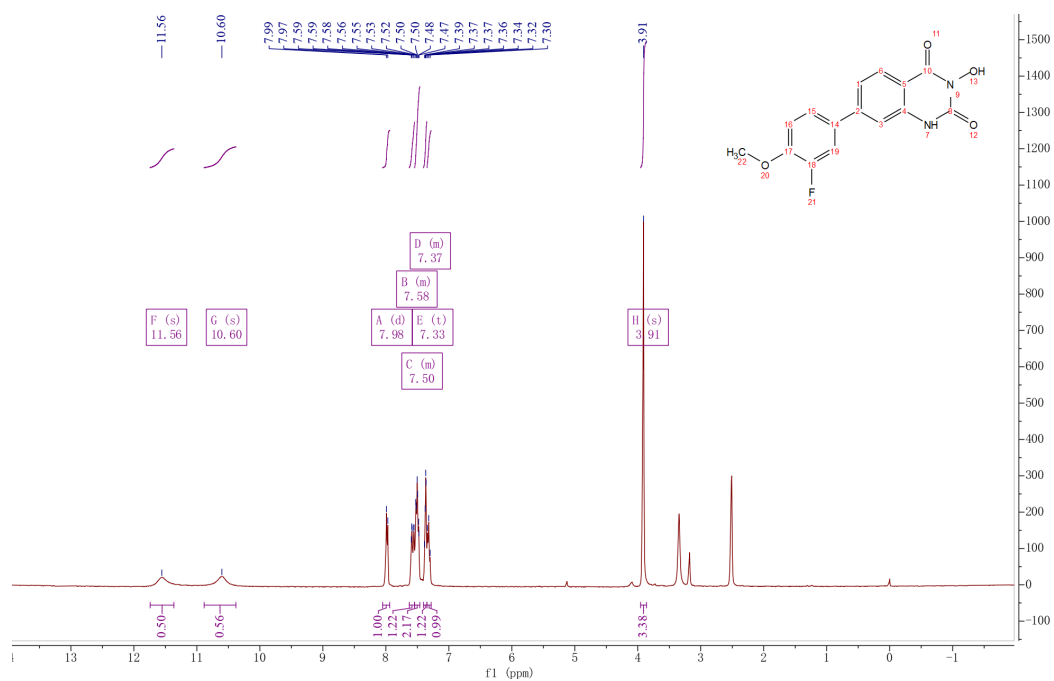

**Figure S117.**  $^1\text{H}$  NMR (400 MHz,  $\text{DMSO}-d_6$ ) spectrum of **21o**

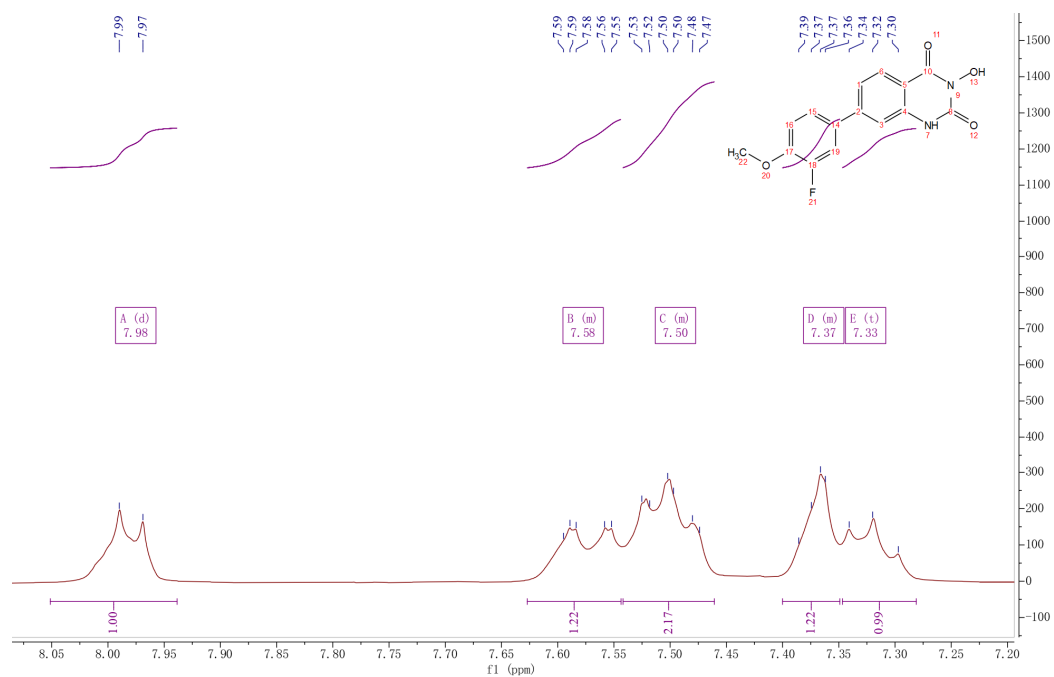

**Figure S118.** Magnified  $^1\text{H}$  NMR (400 MHz,  $\text{DMSO}-d_6$ ) spectrum fragments of **21o**

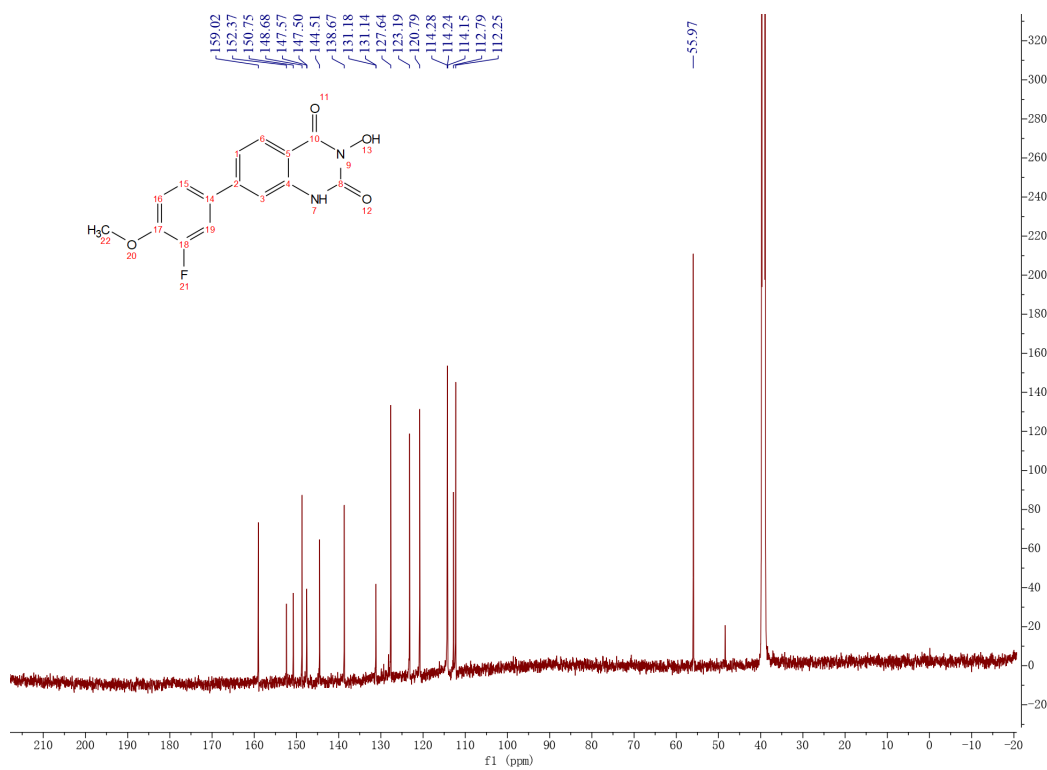

**Figure S119.** <sup>13</sup>C NMR (151 MHz, DMSO-*d*<sub>6</sub>) spectrum of **21o**

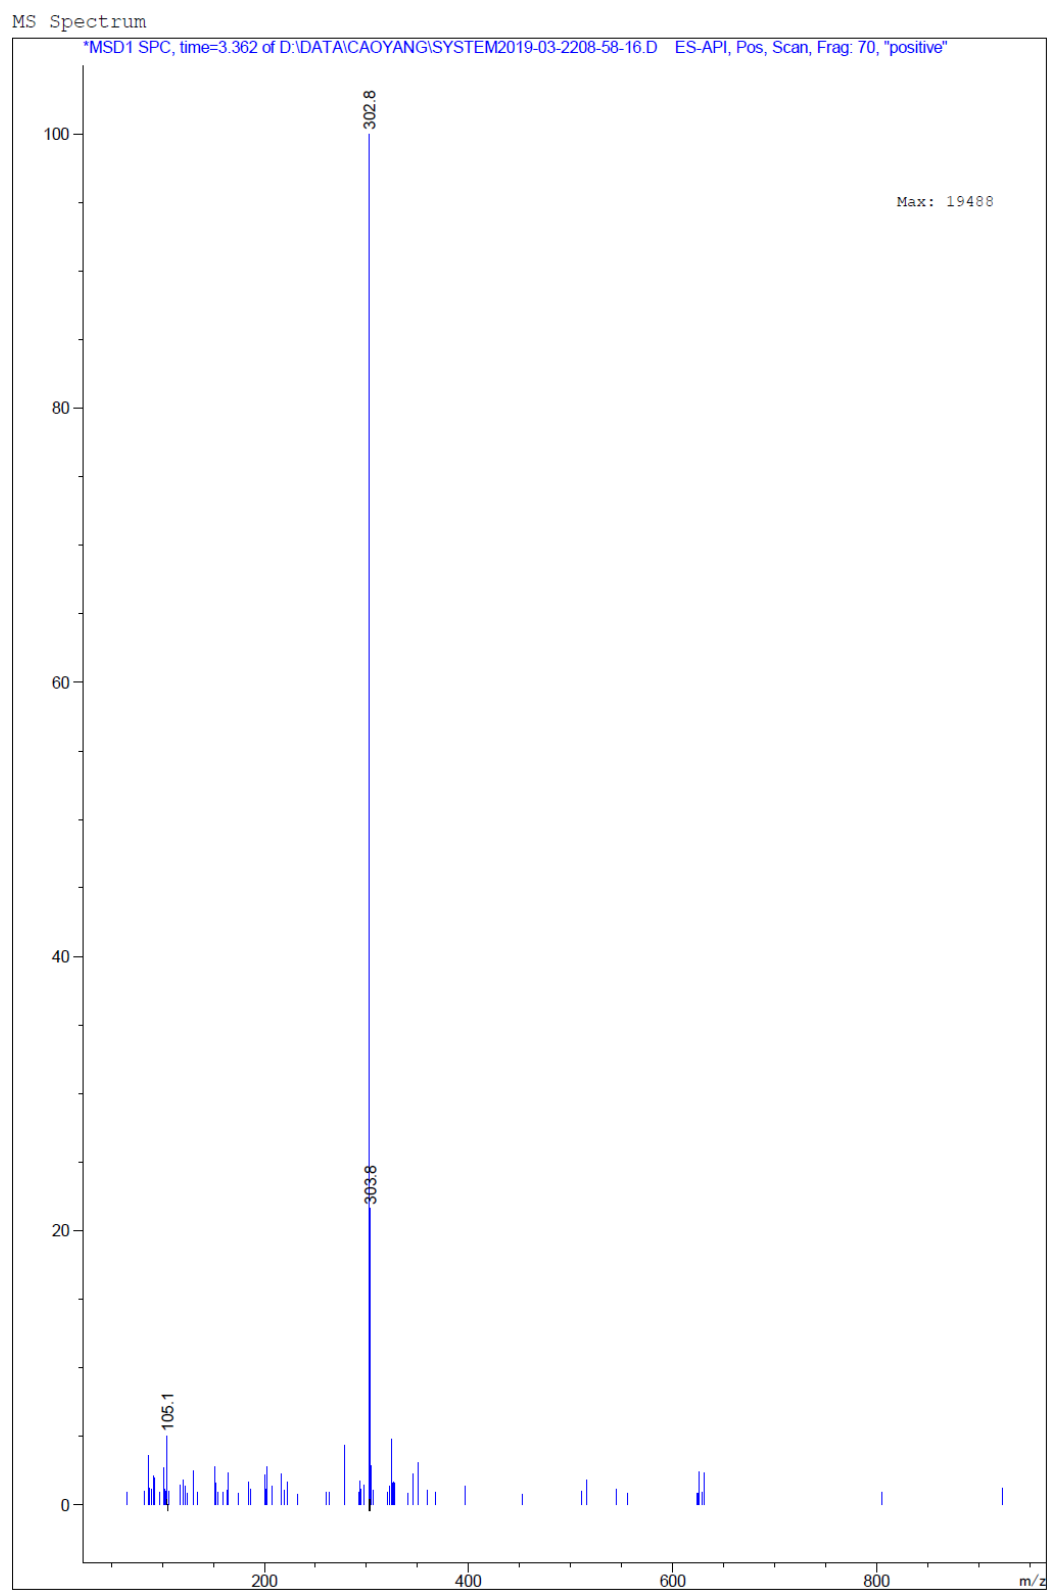

**Figure S120.** Mass spectrum (positive ionization) of **21o**

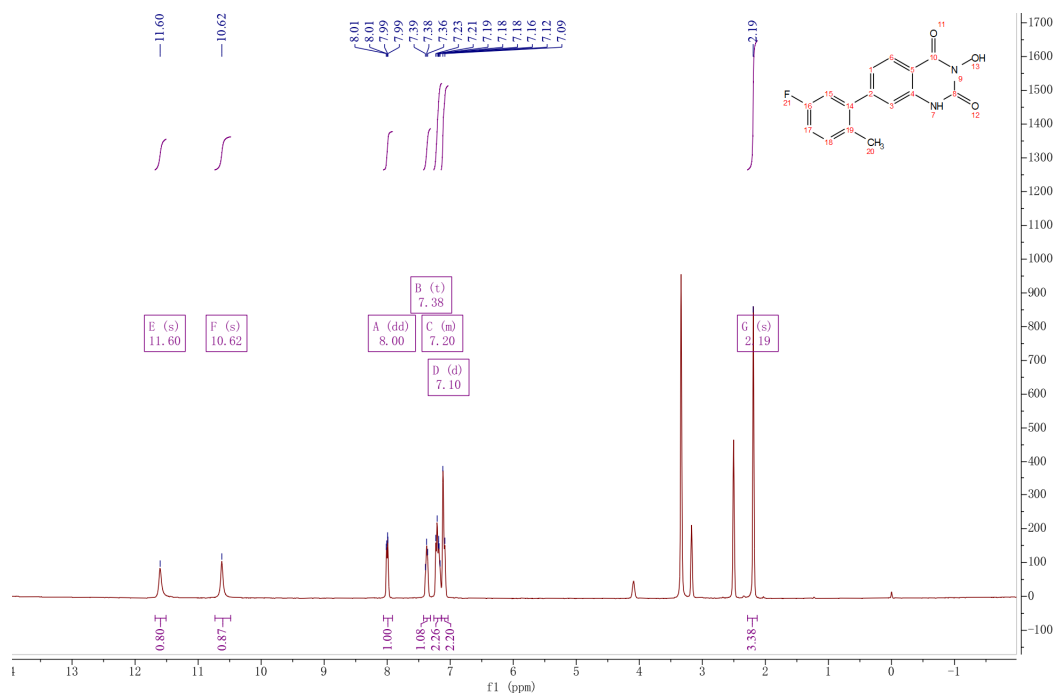

**Figure S121.**  $^1\text{H}$  NMR (400 MHz,  $\text{DMSO}-d_6$ ) spectrum of **21p**

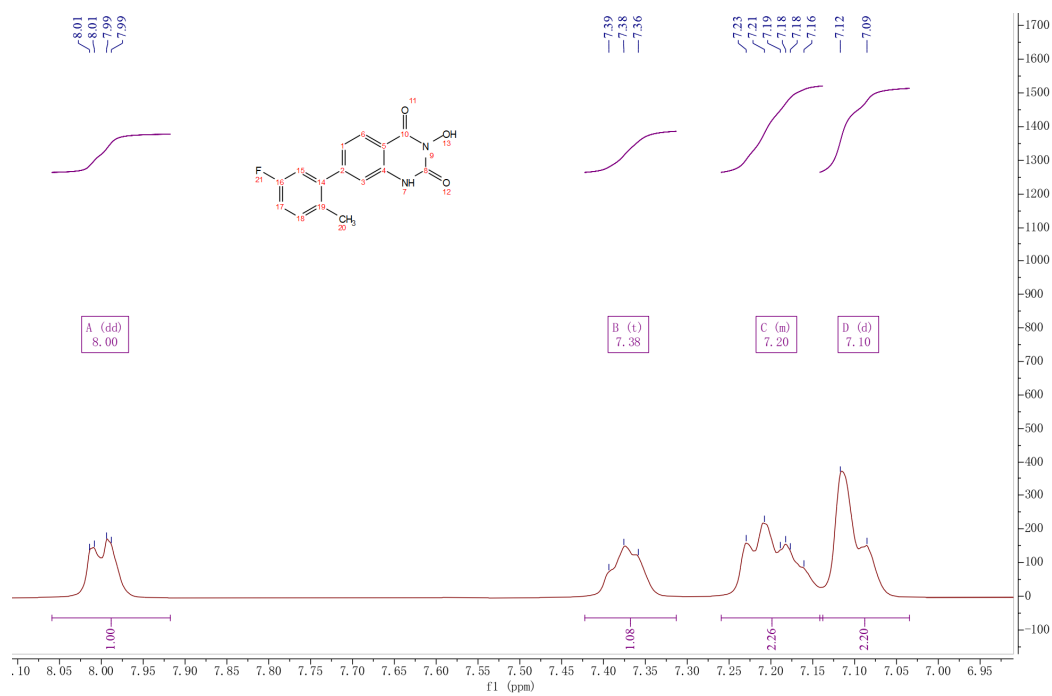

**Figure S122.** Magnified  $^1\text{H}$  NMR (400 MHz,  $\text{DMSO}-d_6$ ) spectrum fragments of **21p**

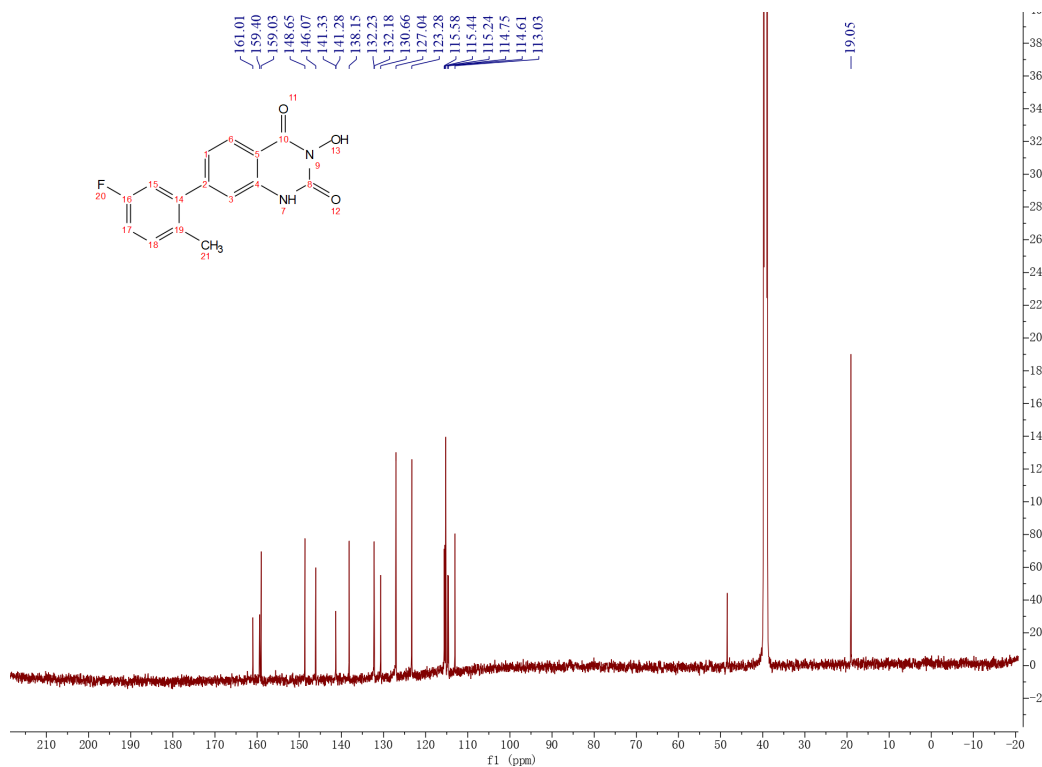

**Figure S123.**  $^{13}\text{C}$  NMR (151 MHz, DMSO- $d_6$ ) spectrum of **21p**

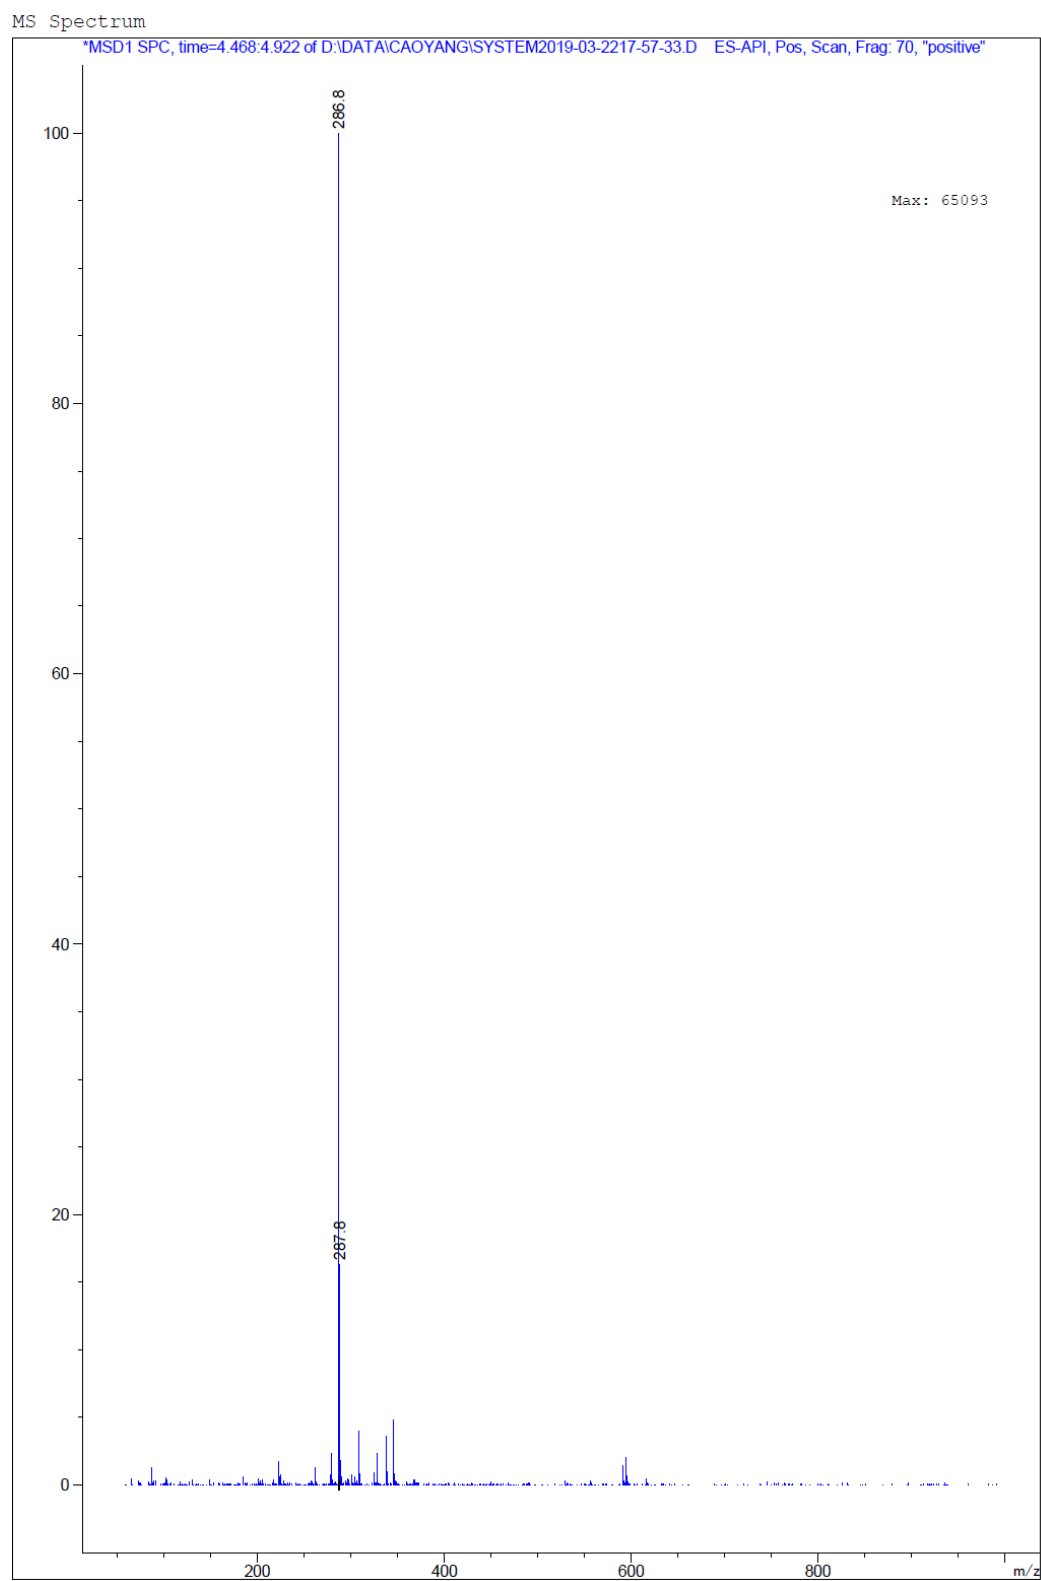

**Figure S124.** Mass spectrum (positive ionization) of **21p**

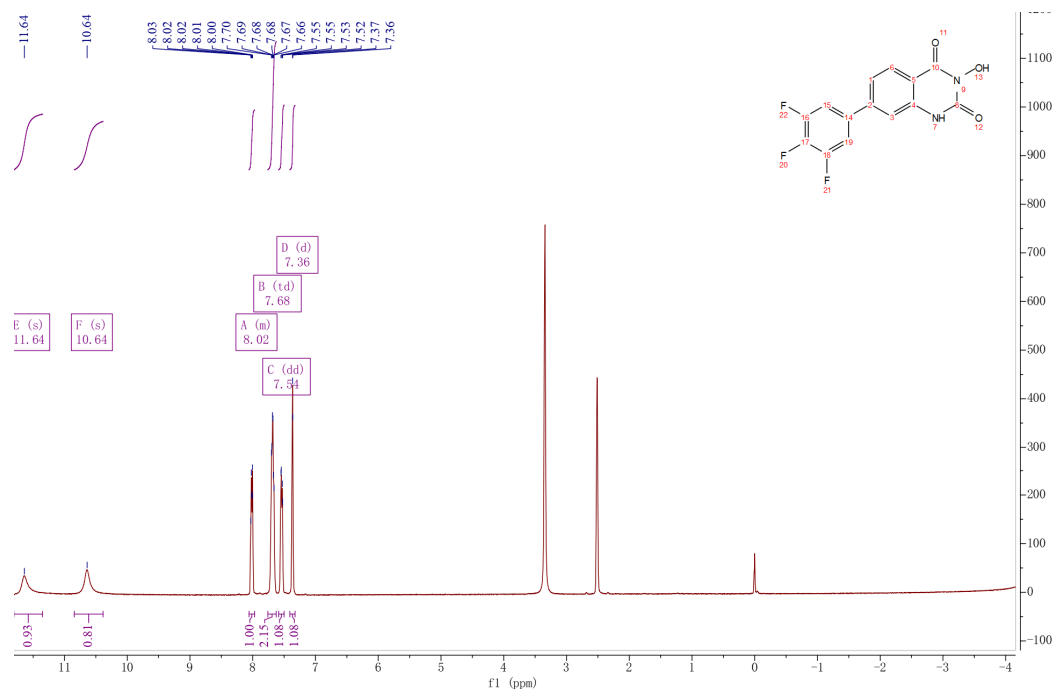

**Figure S125.**  $^1\text{H}$  NMR (400 MHz,  $\text{DMSO}-d_6$ ) spectrum of **21q**

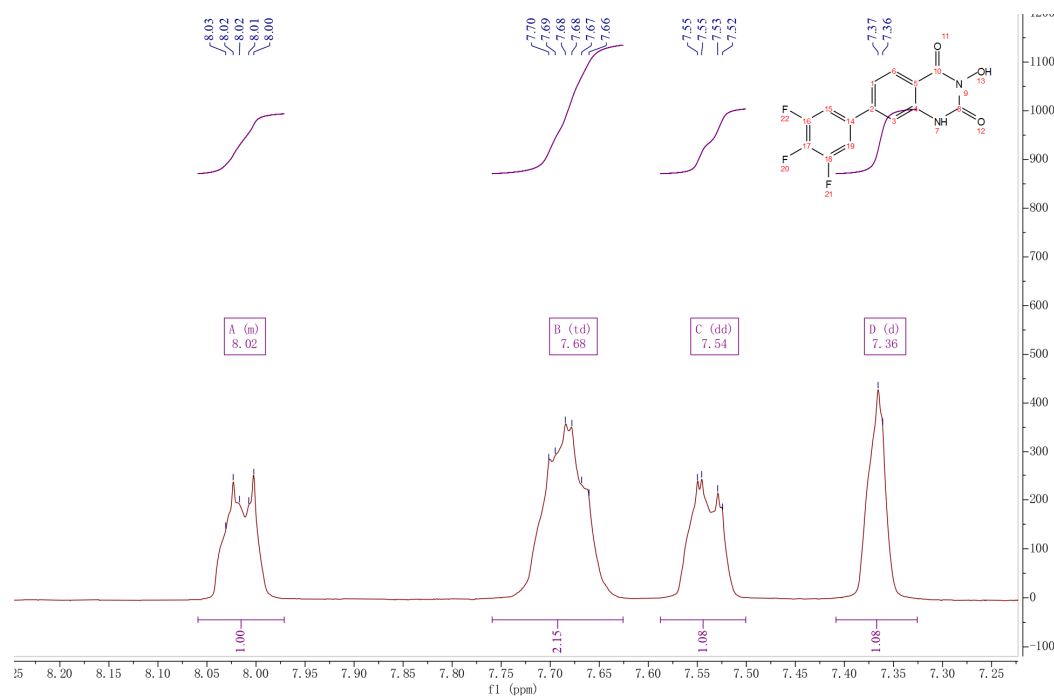

**Figure S126.** Magnified  $^1\text{H}$  NMR (400 MHz,  $\text{DMSO}-d_6$ ) spectrum fragments of **21q**

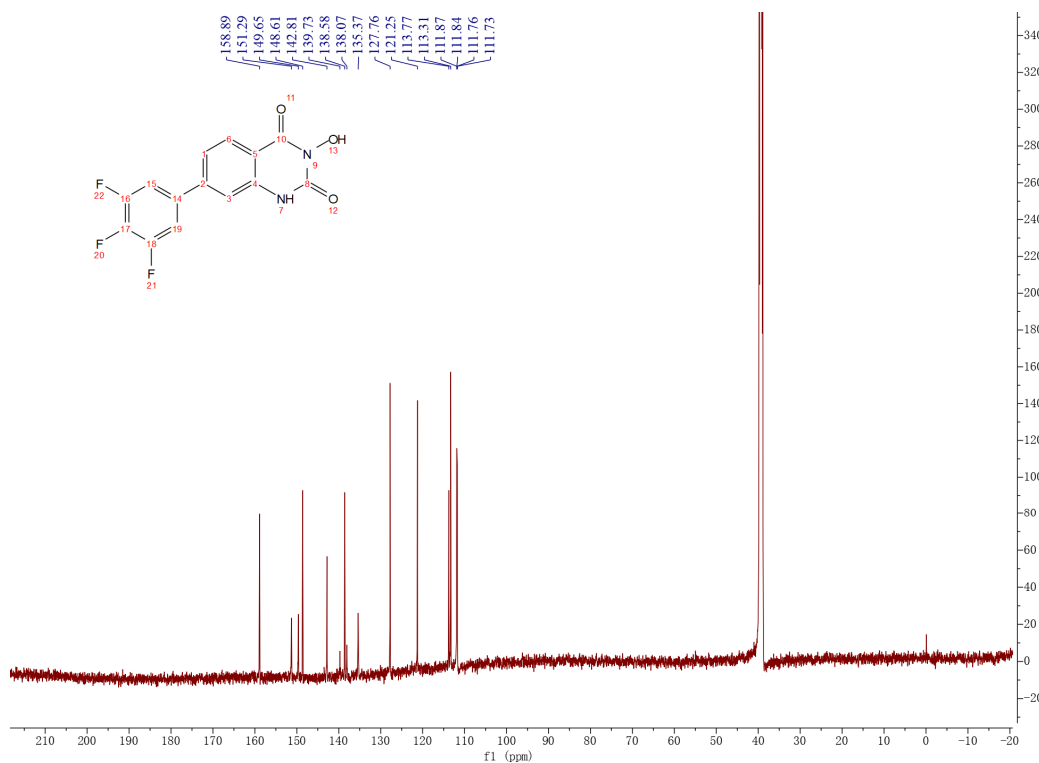

**Figure S127.**  $^{13}\text{C}$  NMR (151 MHz, DMSO- $d_6$ ) spectrum of **21q**

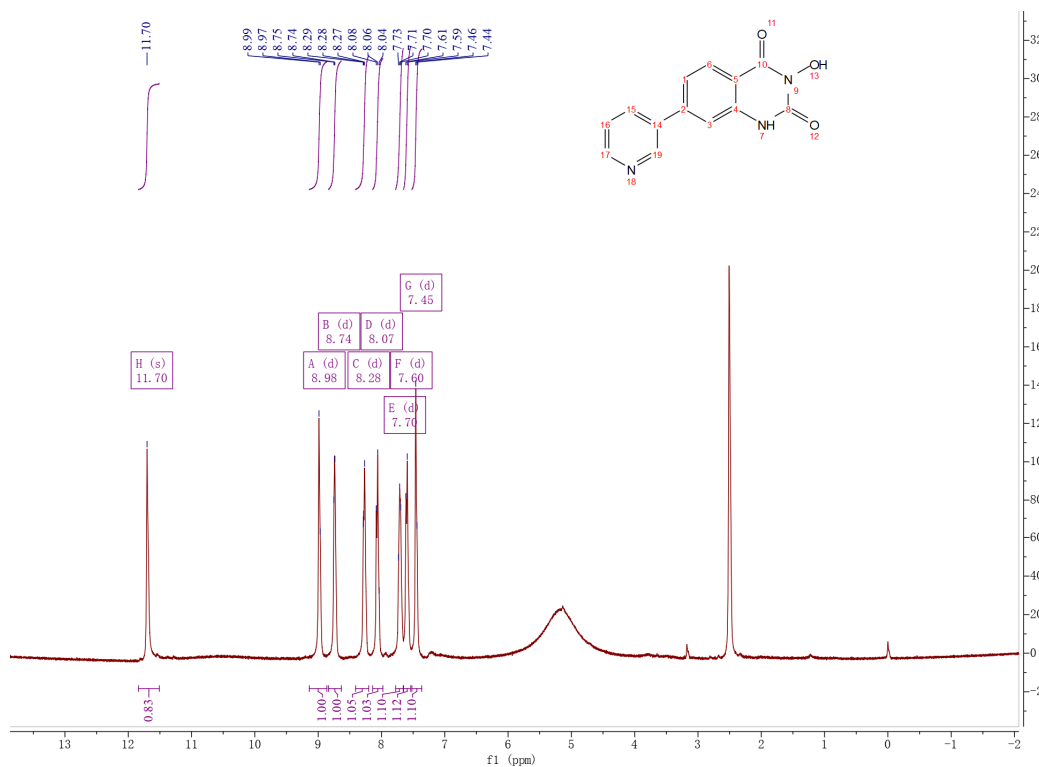

**Figure S128.**  $^1\text{H}$  NMR (400 MHz, DMSO- $d_6$ ) spectrum of **21r**



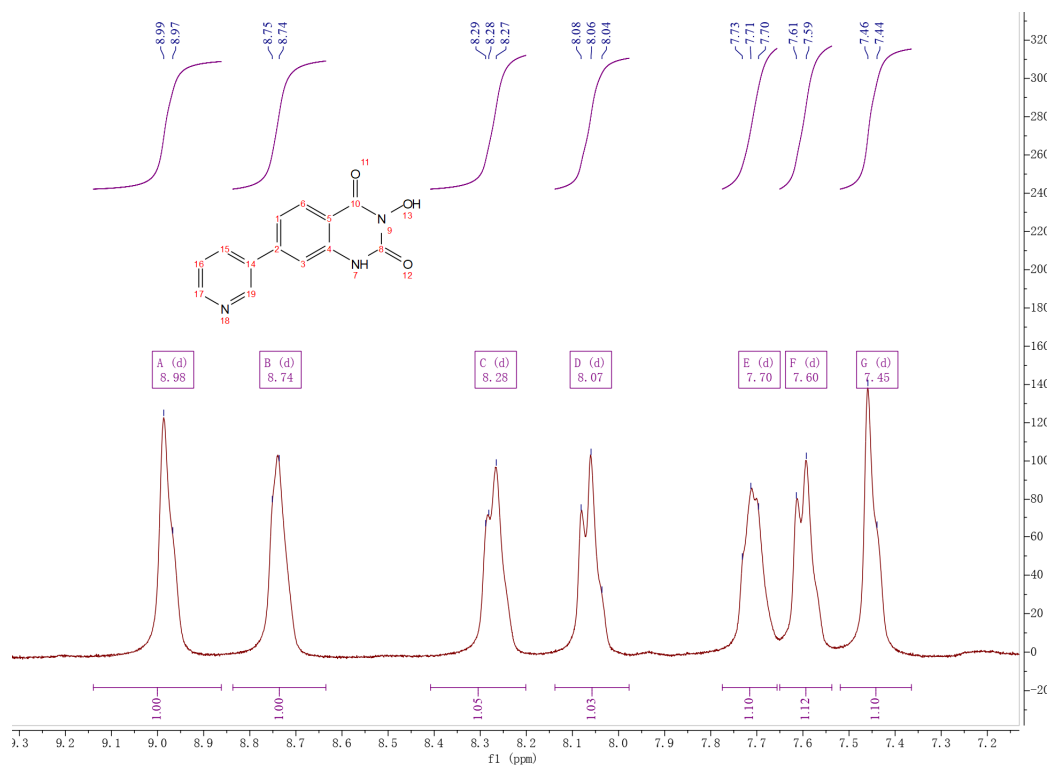

**Figure S129.** Magnified  $^1\text{H}$  NMR (400 MHz, DMSO- $d_6$ ) spectrum fragments of **21r**

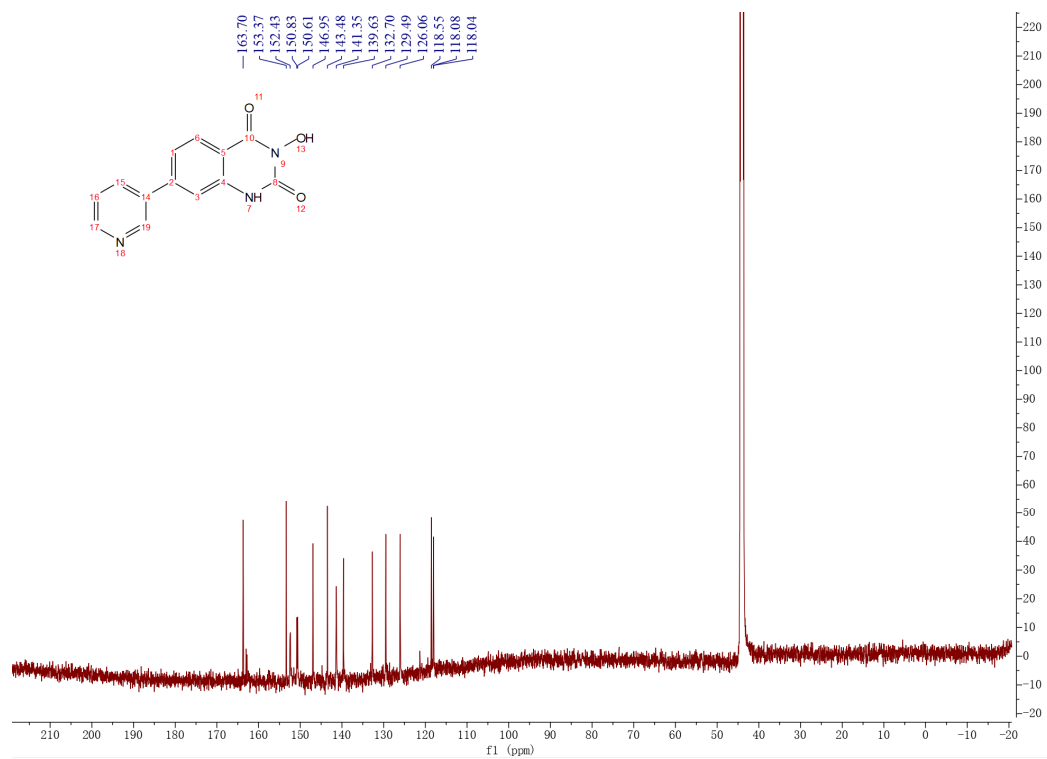

**Figure S130.**  $^{13}\text{C}$  NMR (151 MHz, DMSO- $d_6$ ) spectrum of **21r**

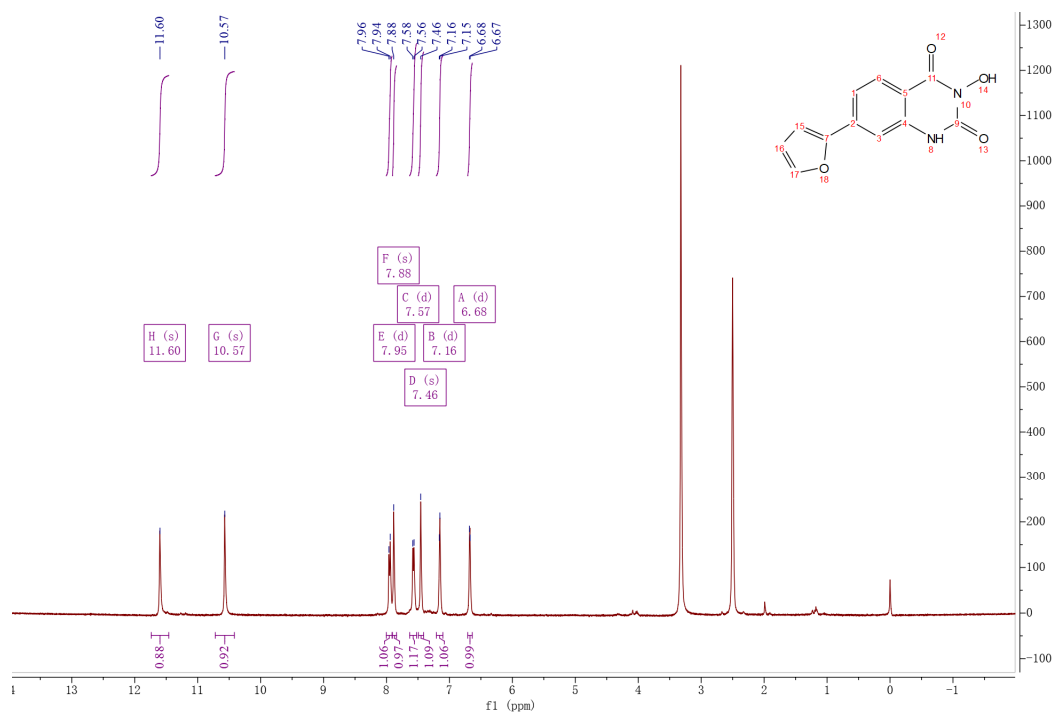

**Figure S131.**  $^1\text{H}$  NMR (400 MHz,  $\text{DMSO}-d_6$ ) spectrum of **21s**

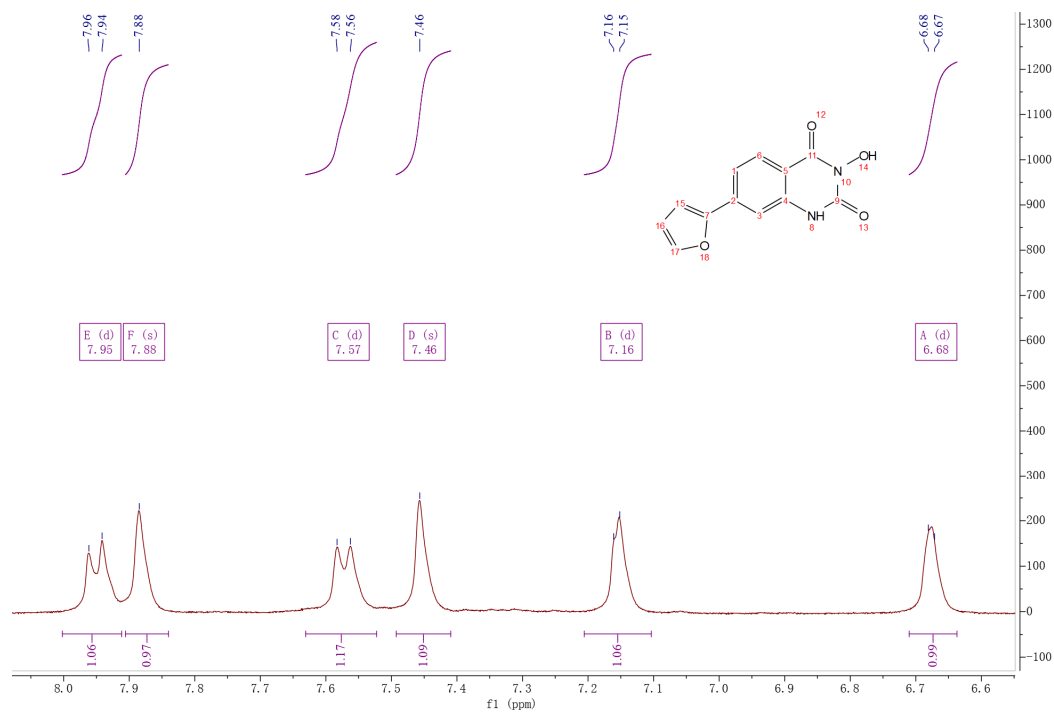

**Figure S132.** Magnified  $^1\text{H}$  NMR (400 MHz,  $\text{DMSO}-d_6$ ) spectrum fragments of **21s**

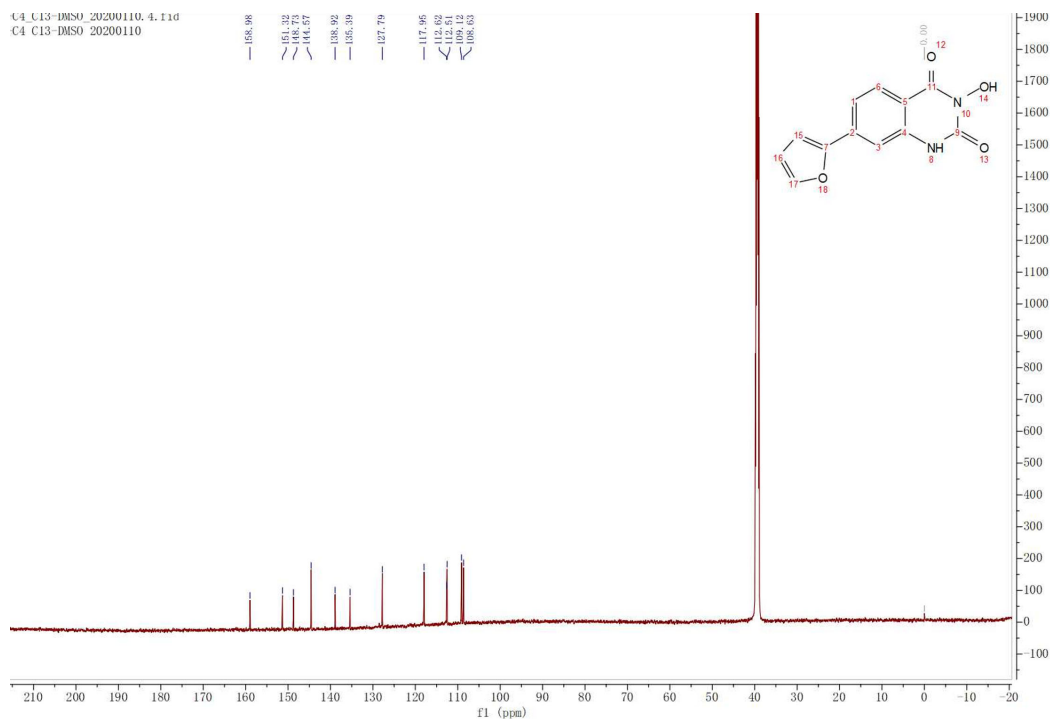

**Figure S133.**  $^{13}\text{C}$  NMR (151 MHz,  $\text{DMSO}-d_6$ ) spectrum of **21s**

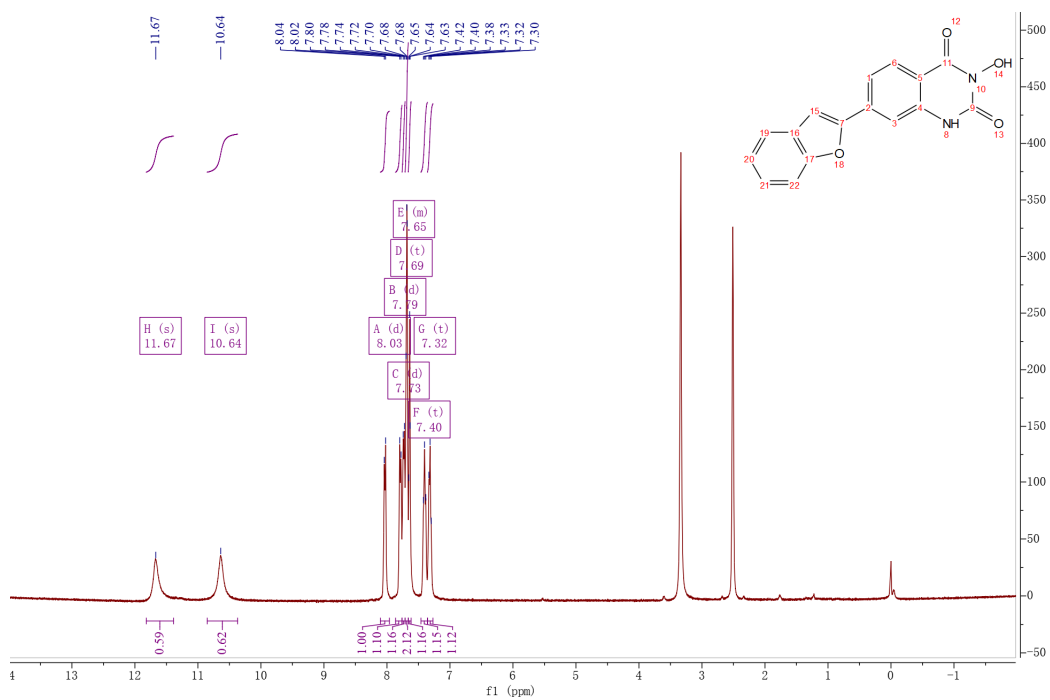

**Figure S134.**  $^1\text{H}$  NMR (400 MHz,  $\text{DMSO}-d_6$ ) spectrum of **21t**

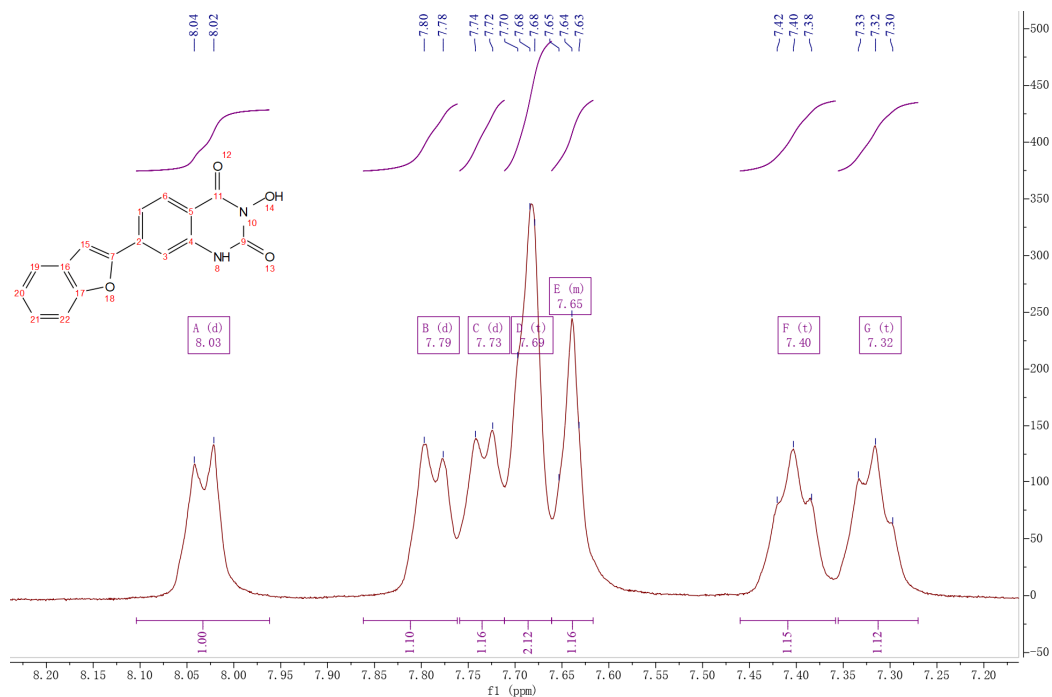

**Figure S135.** Magnified  $^1\text{H}$  NMR (400 MHz,  $\text{DMSO}-d_6$ ) spectrum fragments of **21t**

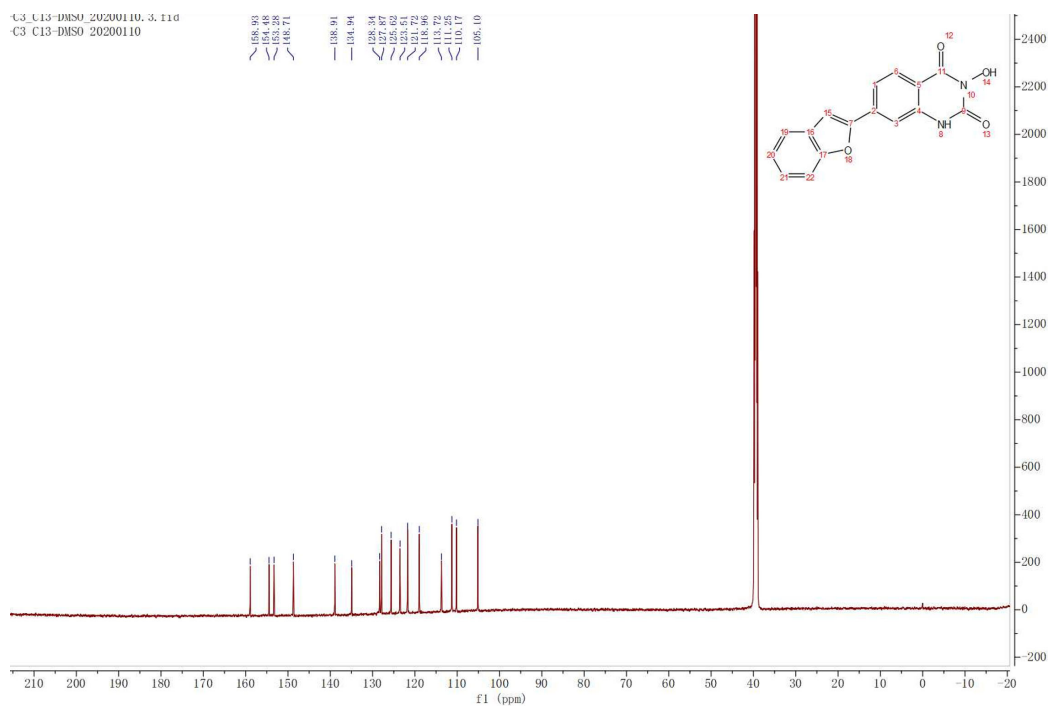

**Figure S136.**  $^{13}\text{C}$  NMR (151 MHz,  $\text{DMSO}-d_6$ ) spectrum of **21t**

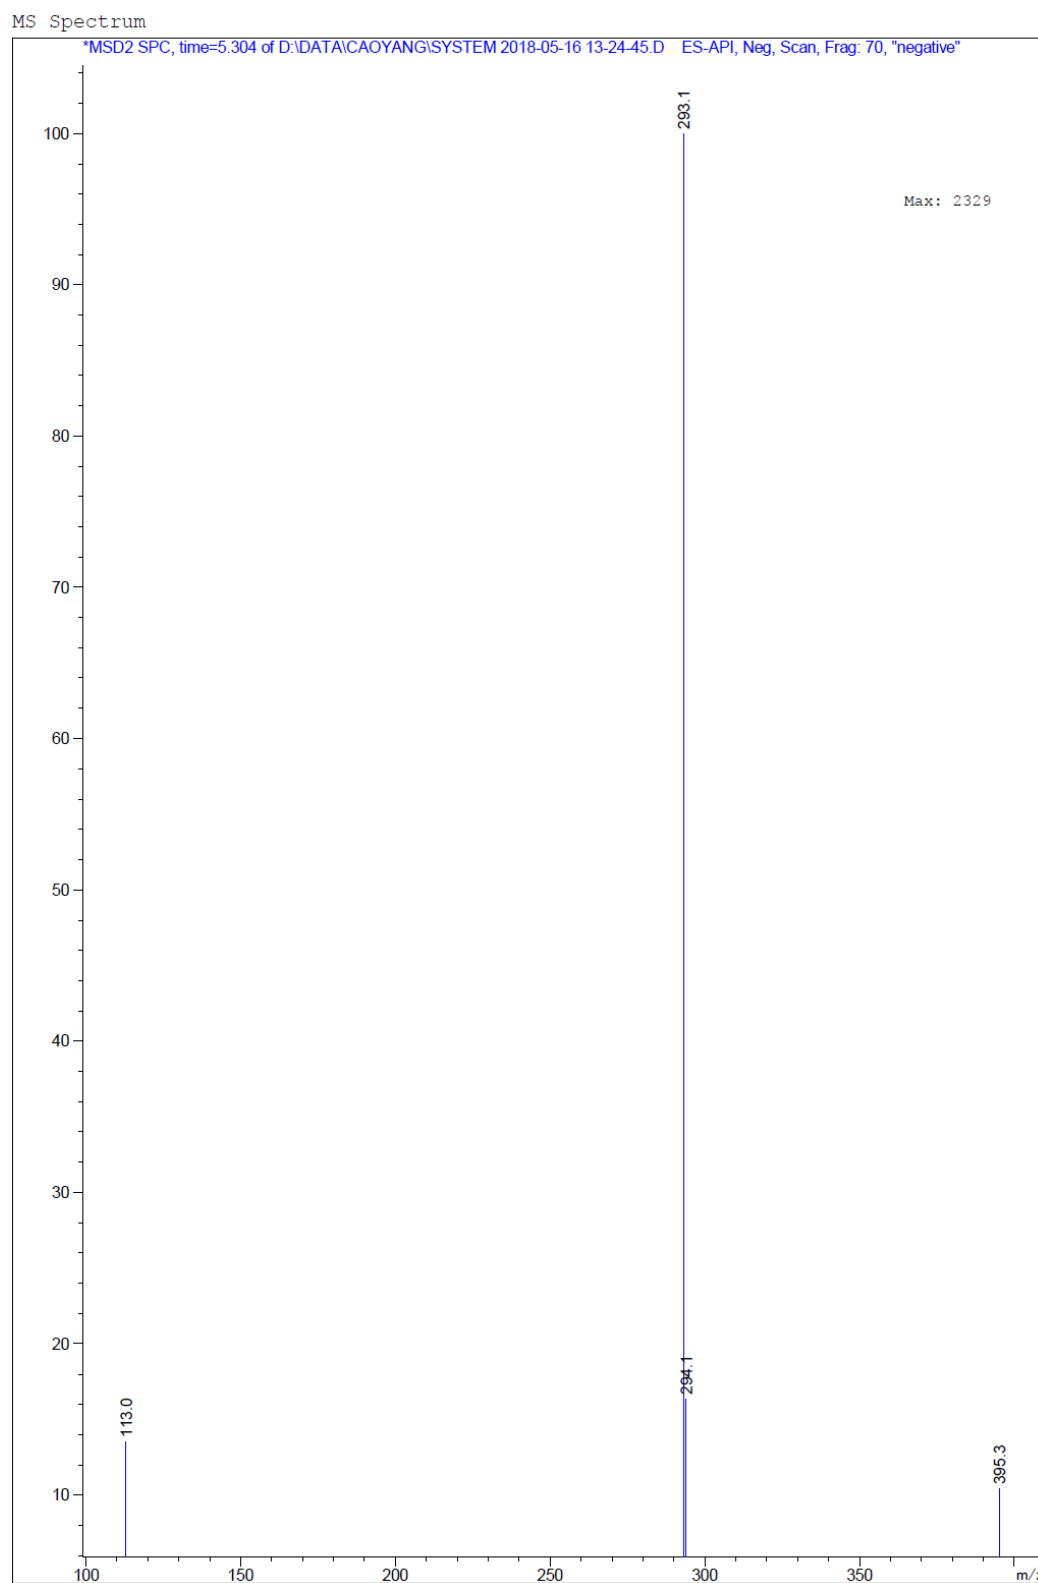

**Figure S137.** Mass spectrum (negative ionization) of **21t**

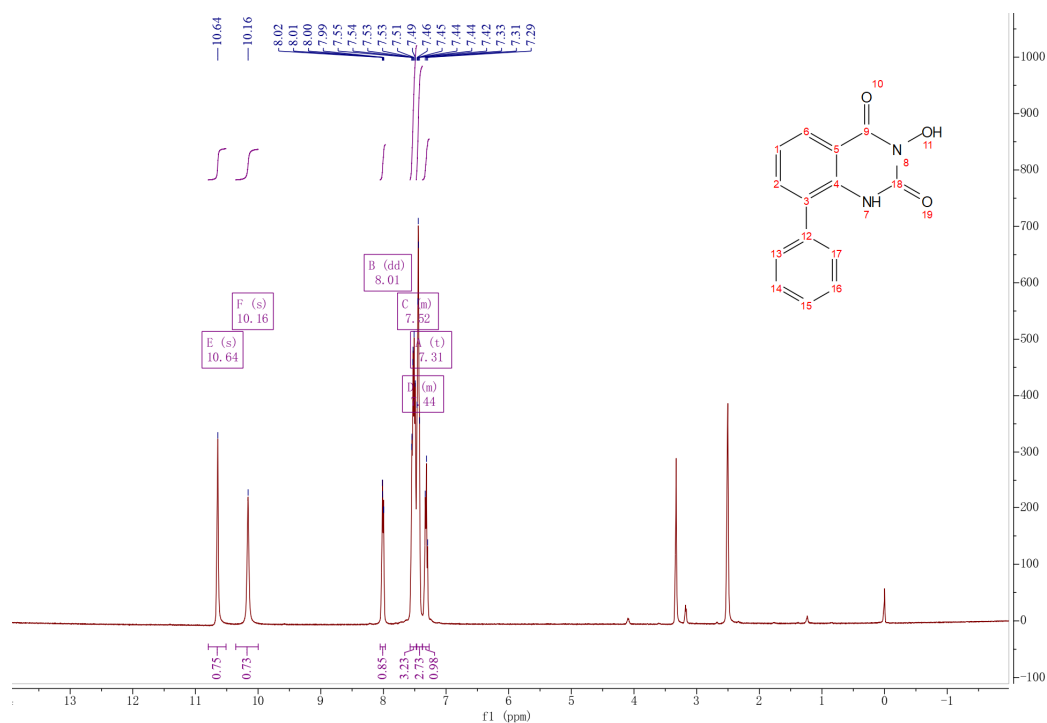

**Figure S138.**  $^1\text{H}$  NMR (400 MHz,  $\text{DMSO}-d_6$ ) spectrum of **21u**

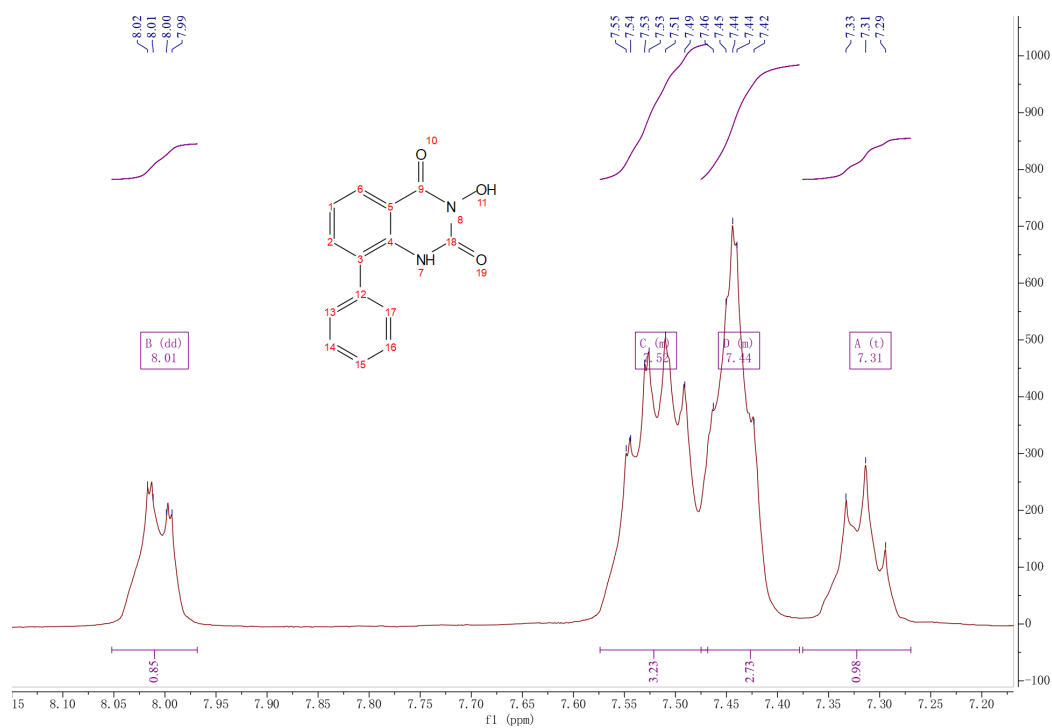

**Figure S139.** Magnified  $^1\text{H}$  NMR (400 MHz,  $\text{DMSO}-d_6$ ) spectrum fragments of **21u**

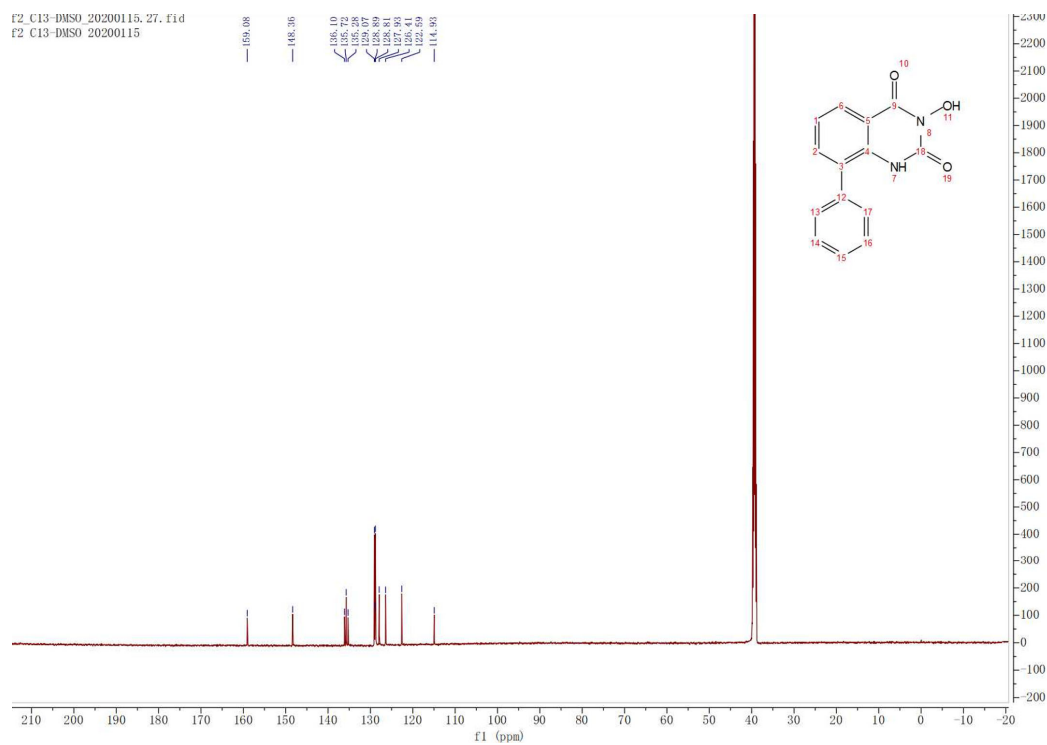

**Figure S140.**  $^{13}\text{C}$  NMR (151 MHz,  $\text{DMSO}-d_6$ ) spectrum of **21u**

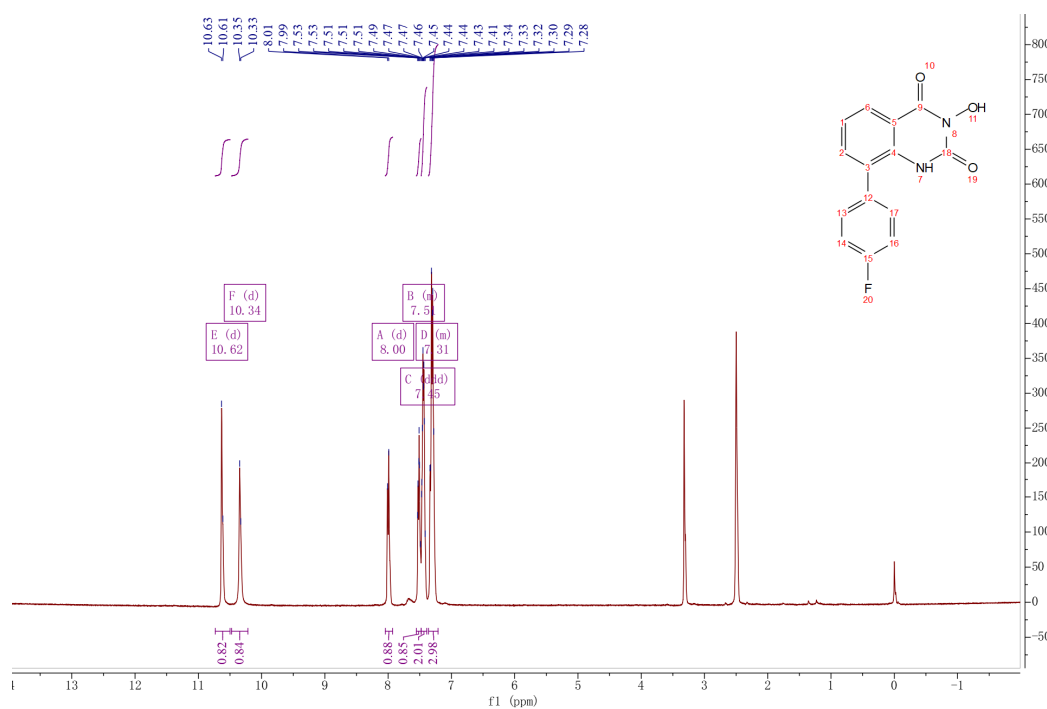

**Figure S141.**  $^1\text{H}$  NMR (400 MHz,  $\text{DMSO}-d_6$ ) spectrum of **21v**

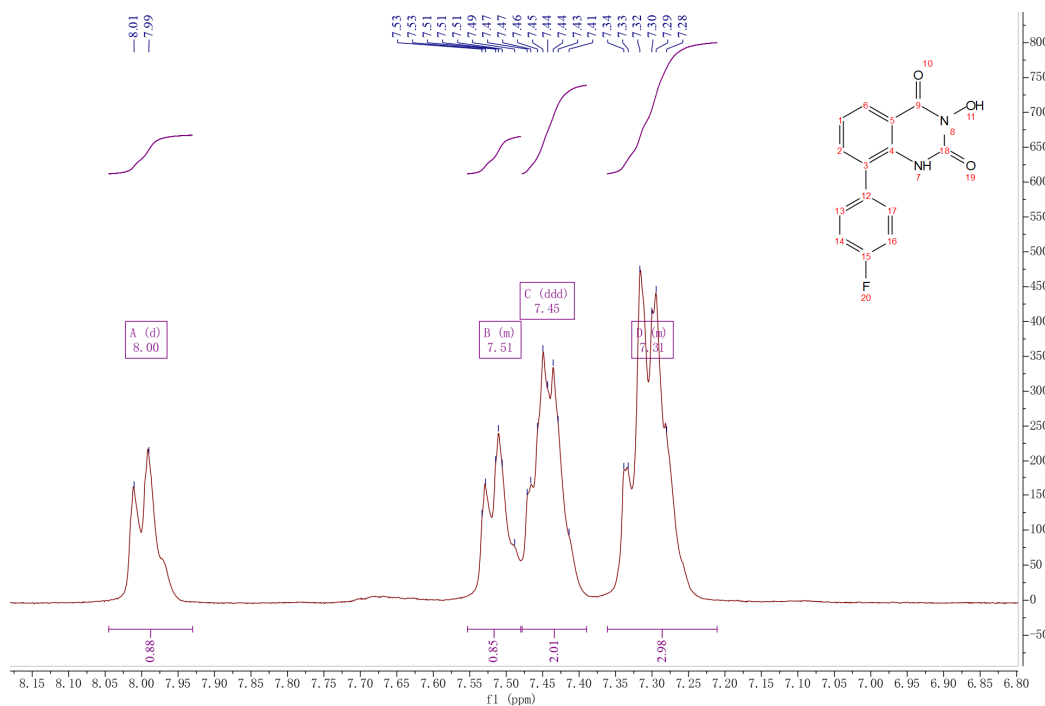

**Figure S142.** Magnified  $^1\text{H}$  NMR (400 MHz,  $\text{DMSO}-d_6$ ) spectrum fragments of **21v**

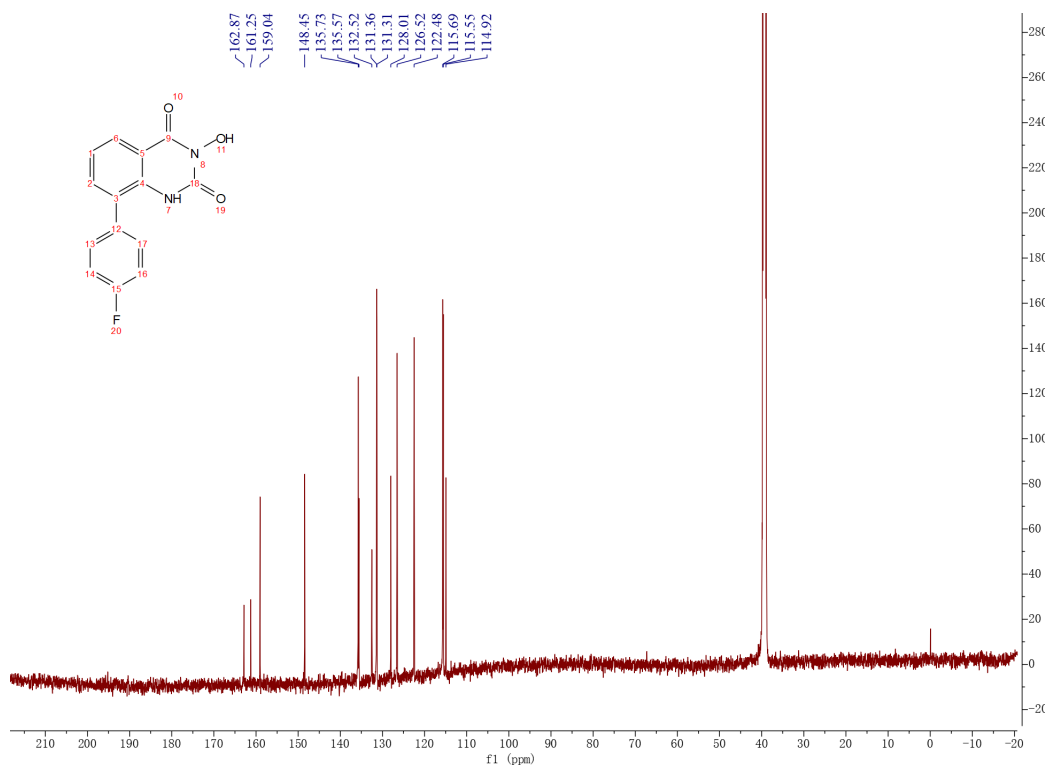

**Figure S143.**  $^{13}\text{C}$  NMR (151 MHz,  $\text{DMSO}-d_6$ ) spectrum of **21v**



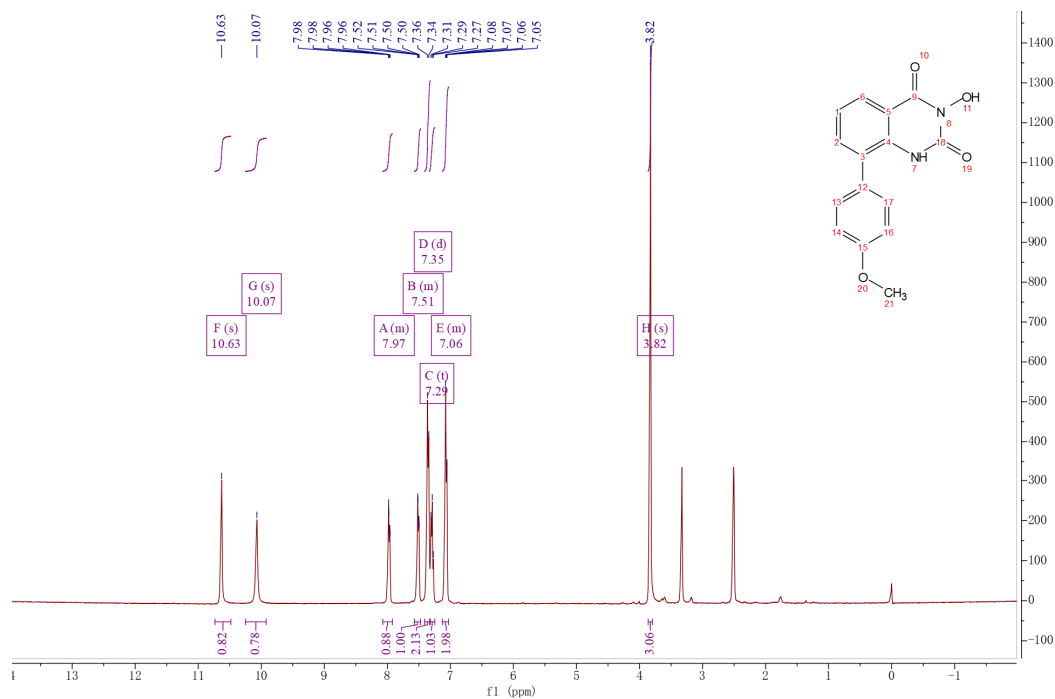

**Figure S144.**  $^1\text{H}$  NMR (400 MHz,  $\text{DMSO}-d_6$ ) spectrum of **21w**

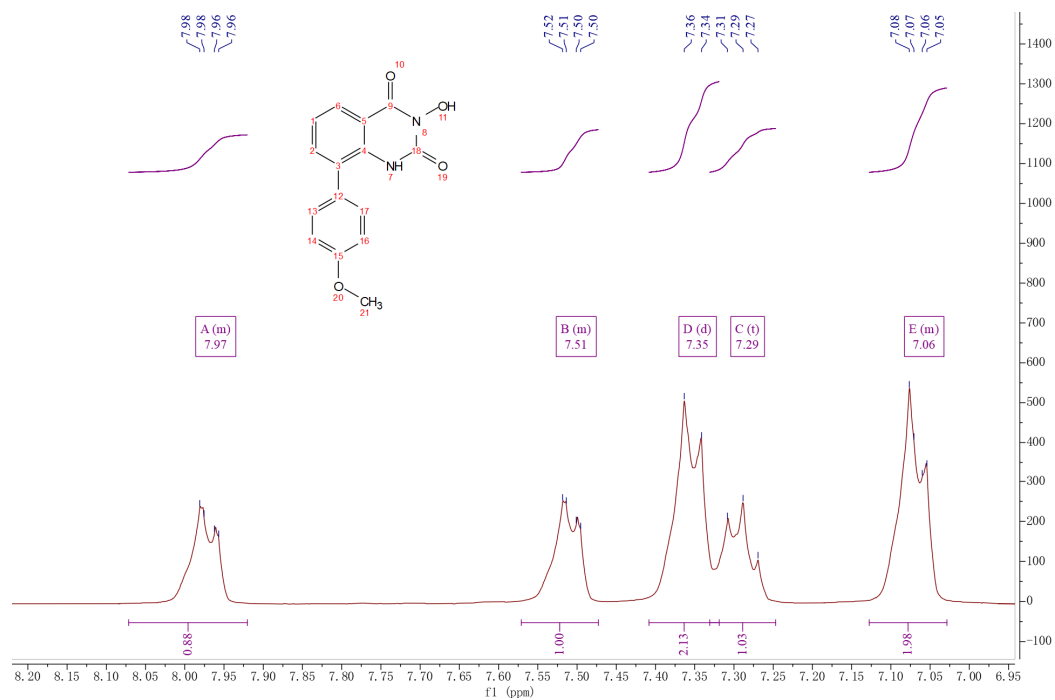

**Figure S145.** Magnified  $^1\text{H}$  NMR (400 MHz,  $\text{DMSO}-d_6$ ) spectrum fragments of **21w**

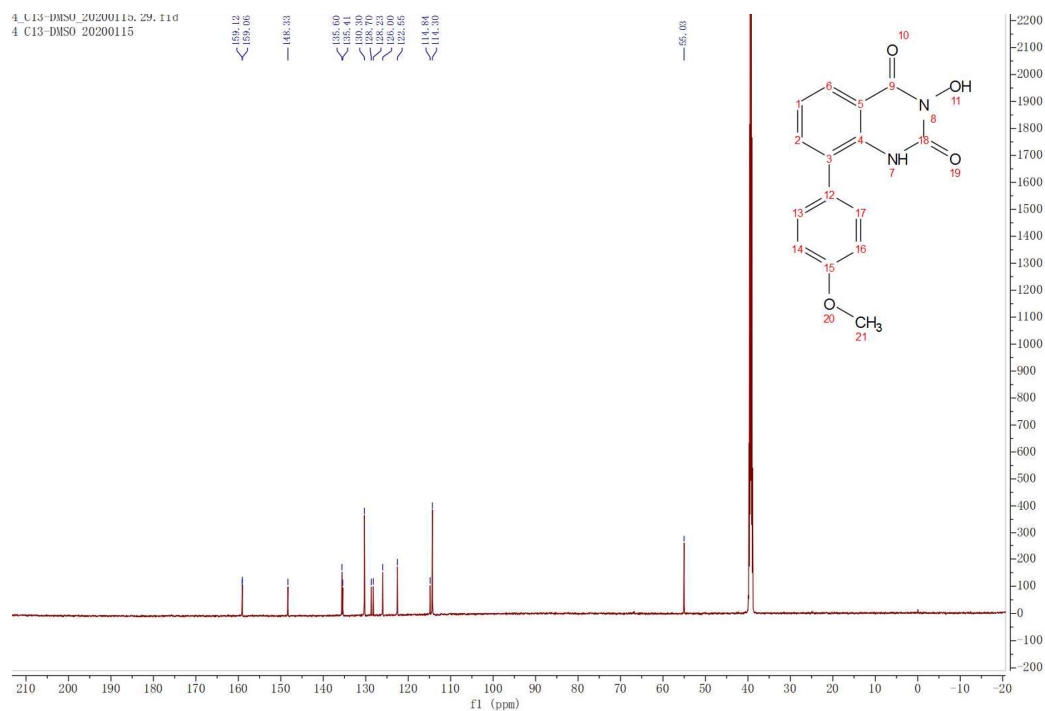

**Figure S146.**  $^{13}\text{C}$  NMR (151 MHz,  $\text{DMSO}-d_6$ ) spectrum of **21w**

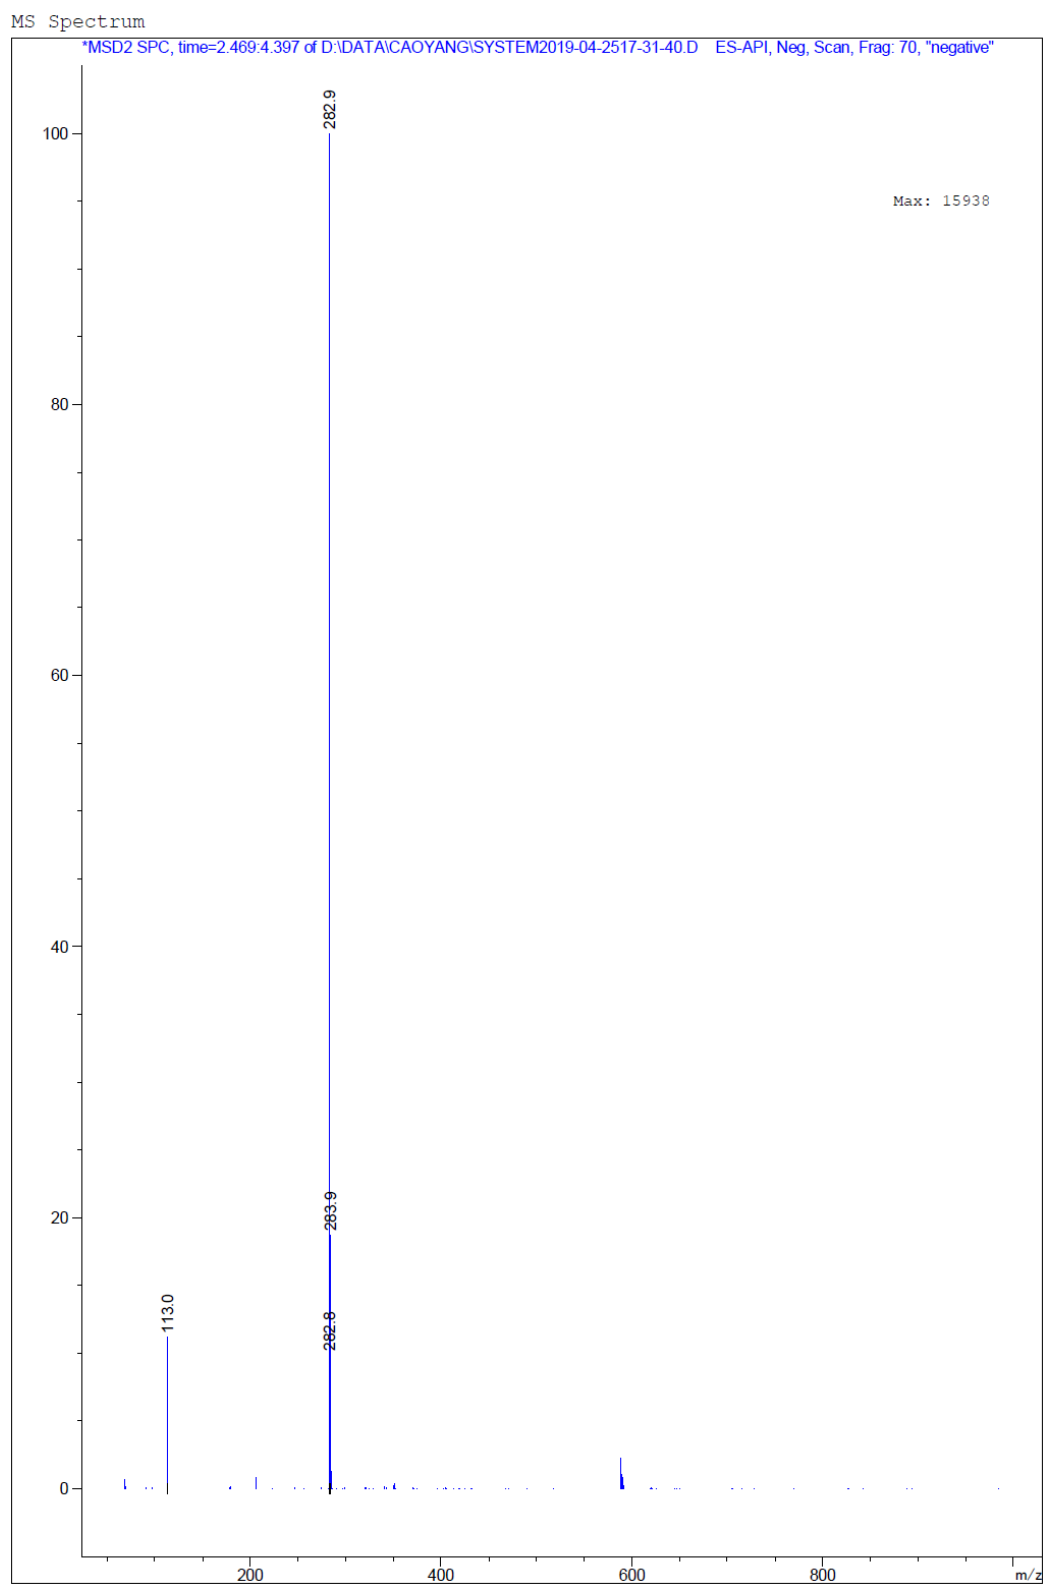

**Figure S147.** Mass spectrum (negative ionization) of **21w**

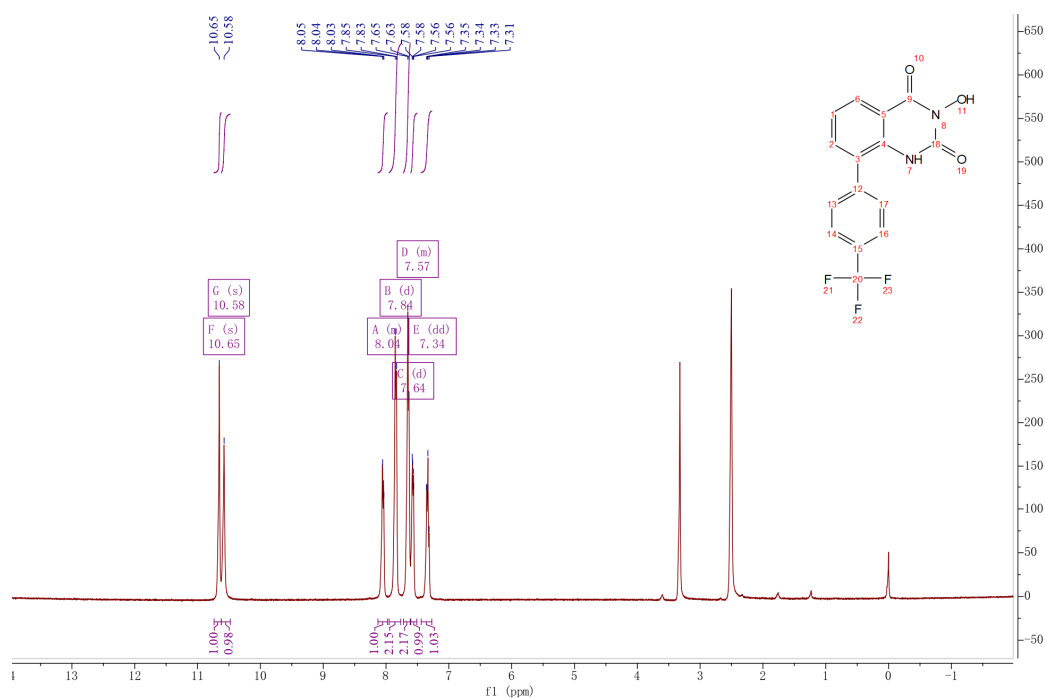

**Figure S148.**  $^1\text{H}$  NMR (400 MHz,  $\text{DMSO}-d_6$ ) spectrum of **21x**

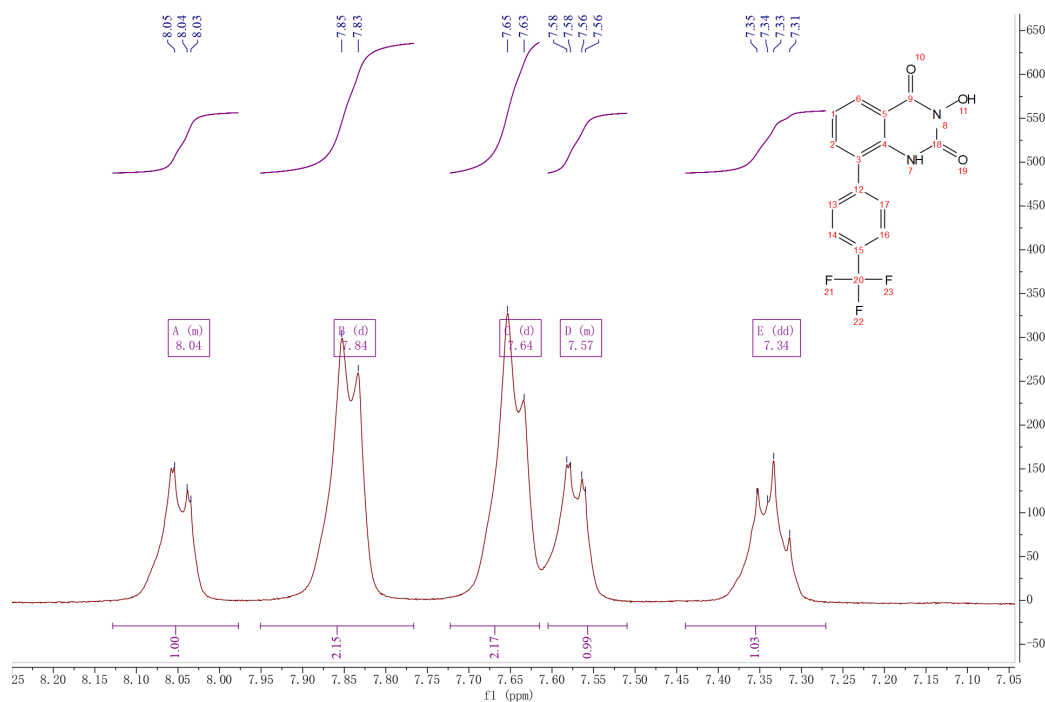

**Figure S149.** Magnified  $^1\text{H}$  NMR (400 MHz,  $\text{DMSO}-d_6$ ) spectrum fragments of **21x**

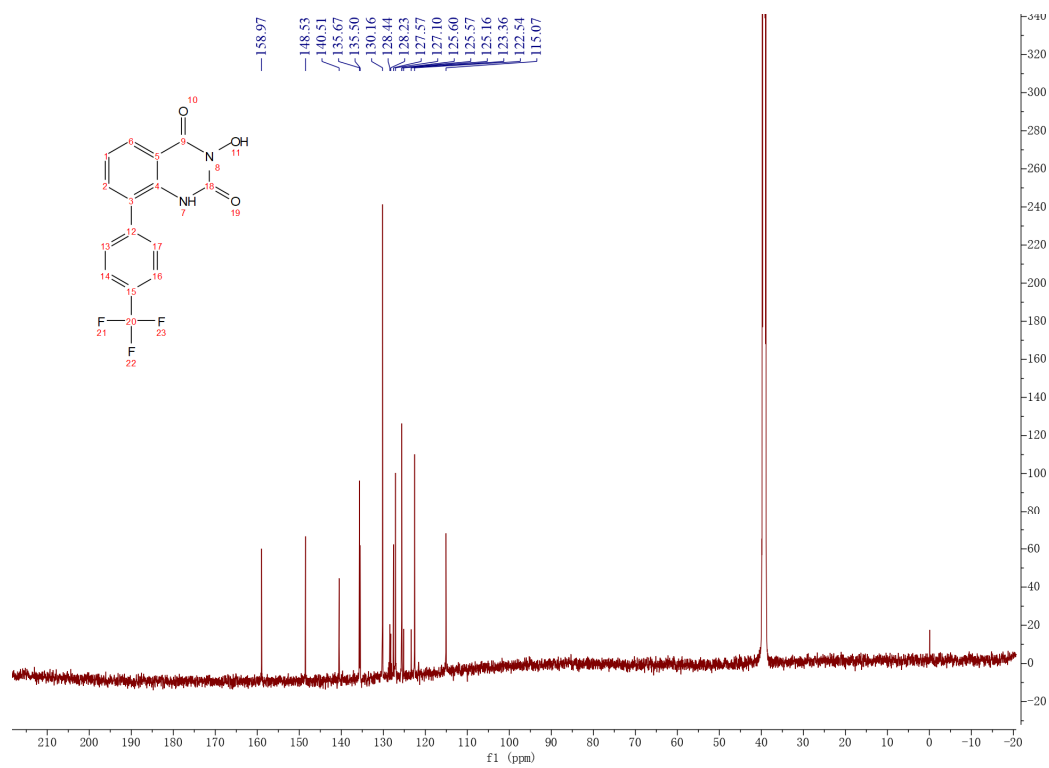

**Figure S150.**  $^{13}\text{C}$  NMR (151 MHz, DMSO- $d_6$ ) spectrum of **21x**

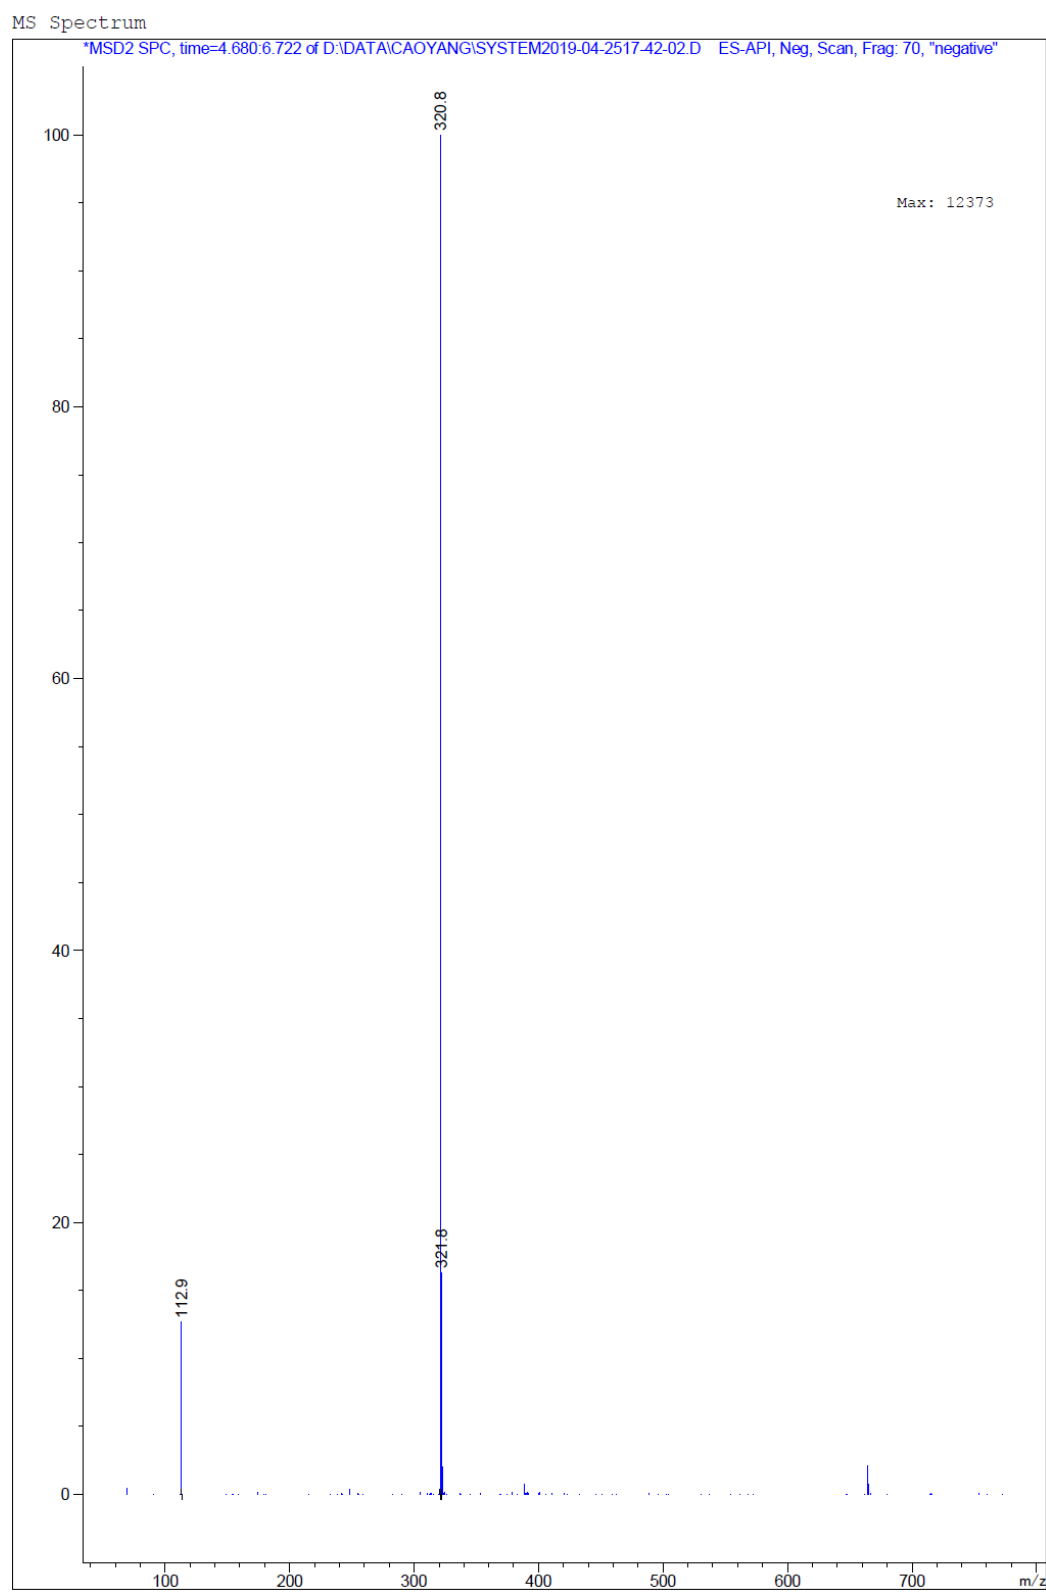

**Figure S151.** Mass spectrum (negative ionization) of **21x**

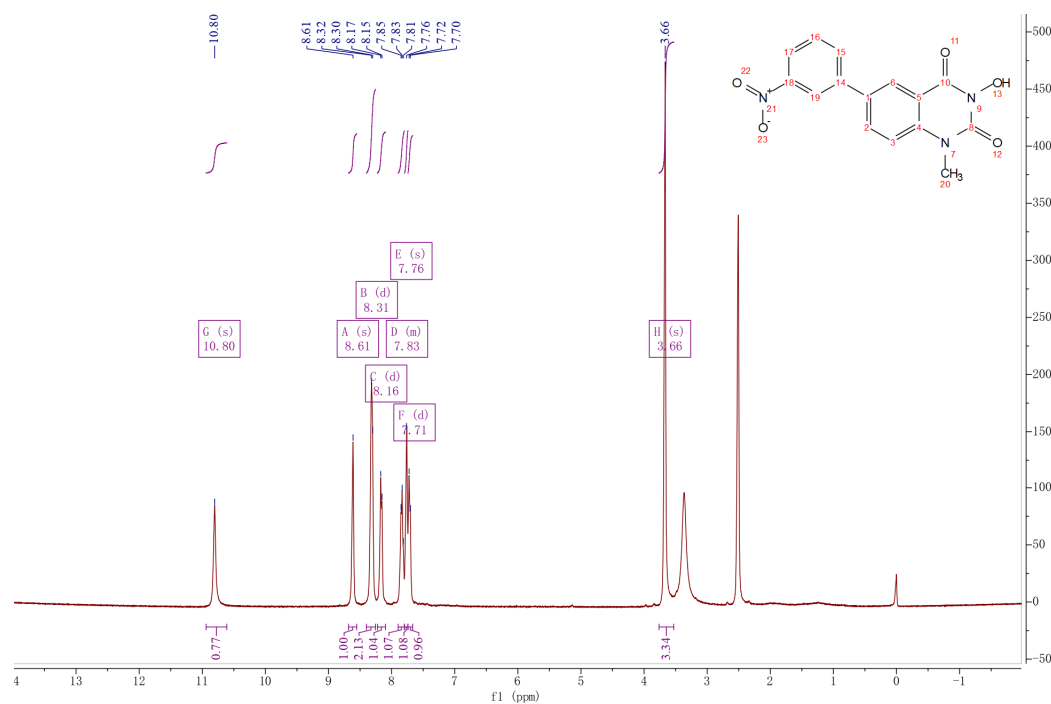

**Figure S152.**  $^1\text{H}$  NMR (400 MHz,  $\text{DMSO}-d_6$ ) spectrum of **23a**

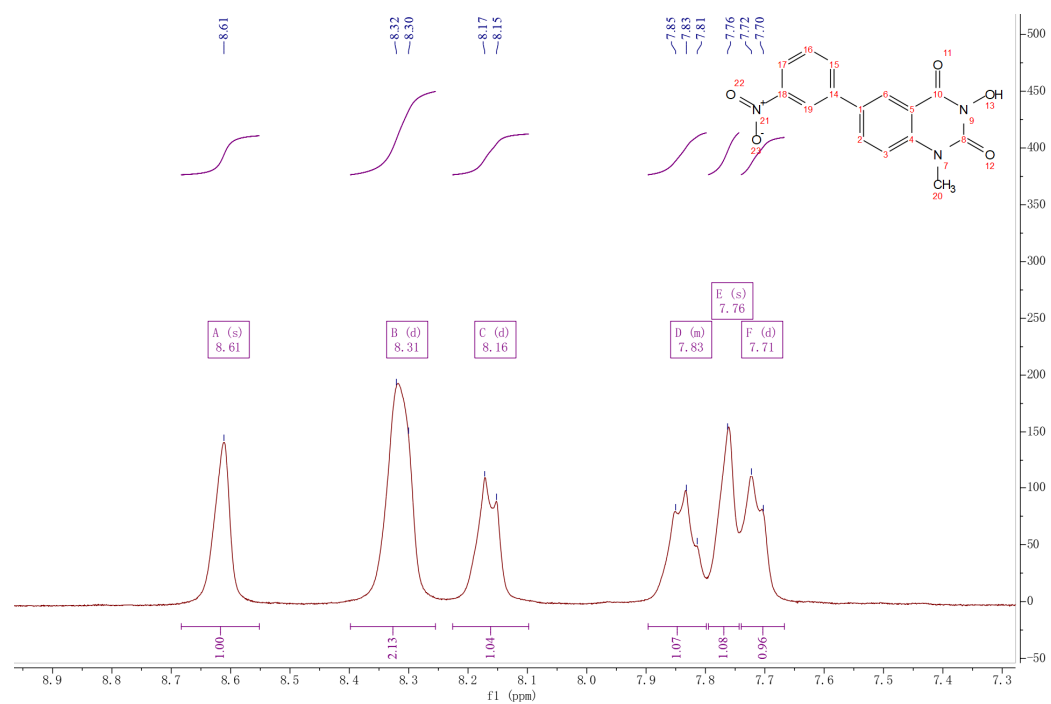

**Figure S153.** Magnified  $^1\text{H}$  NMR (400 MHz,  $\text{DMSO}-d_6$ ) spectrum fragments of **23a**

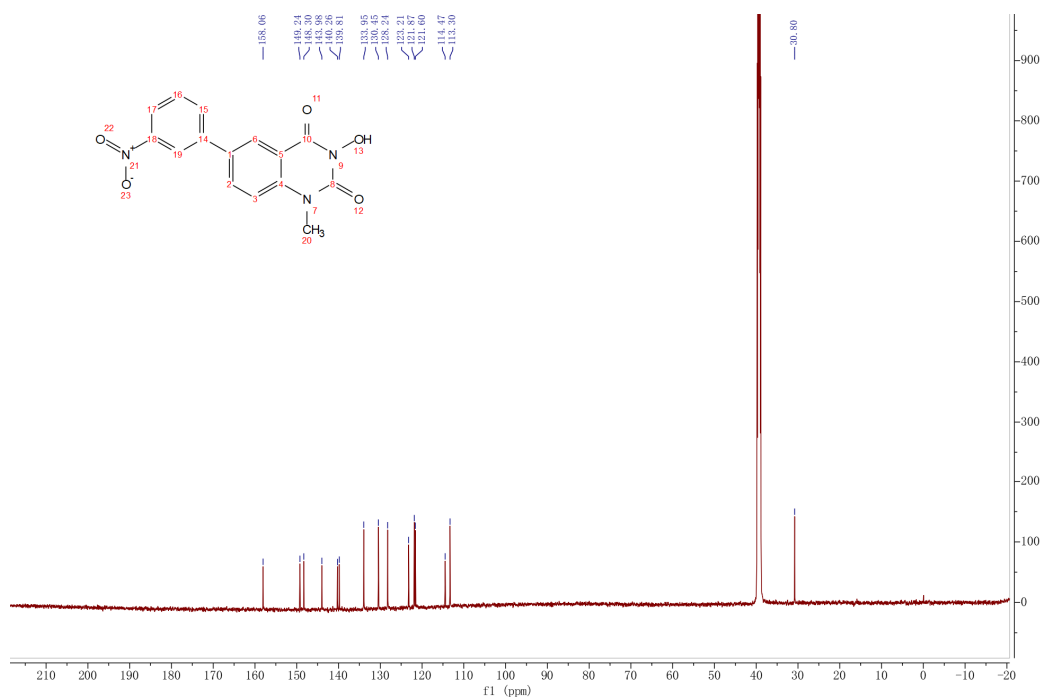

**Figure S154.**  $^{13}\text{C}$  NMR (151 MHz,  $\text{DMSO-}d_6$ ) spectrum of **23a**



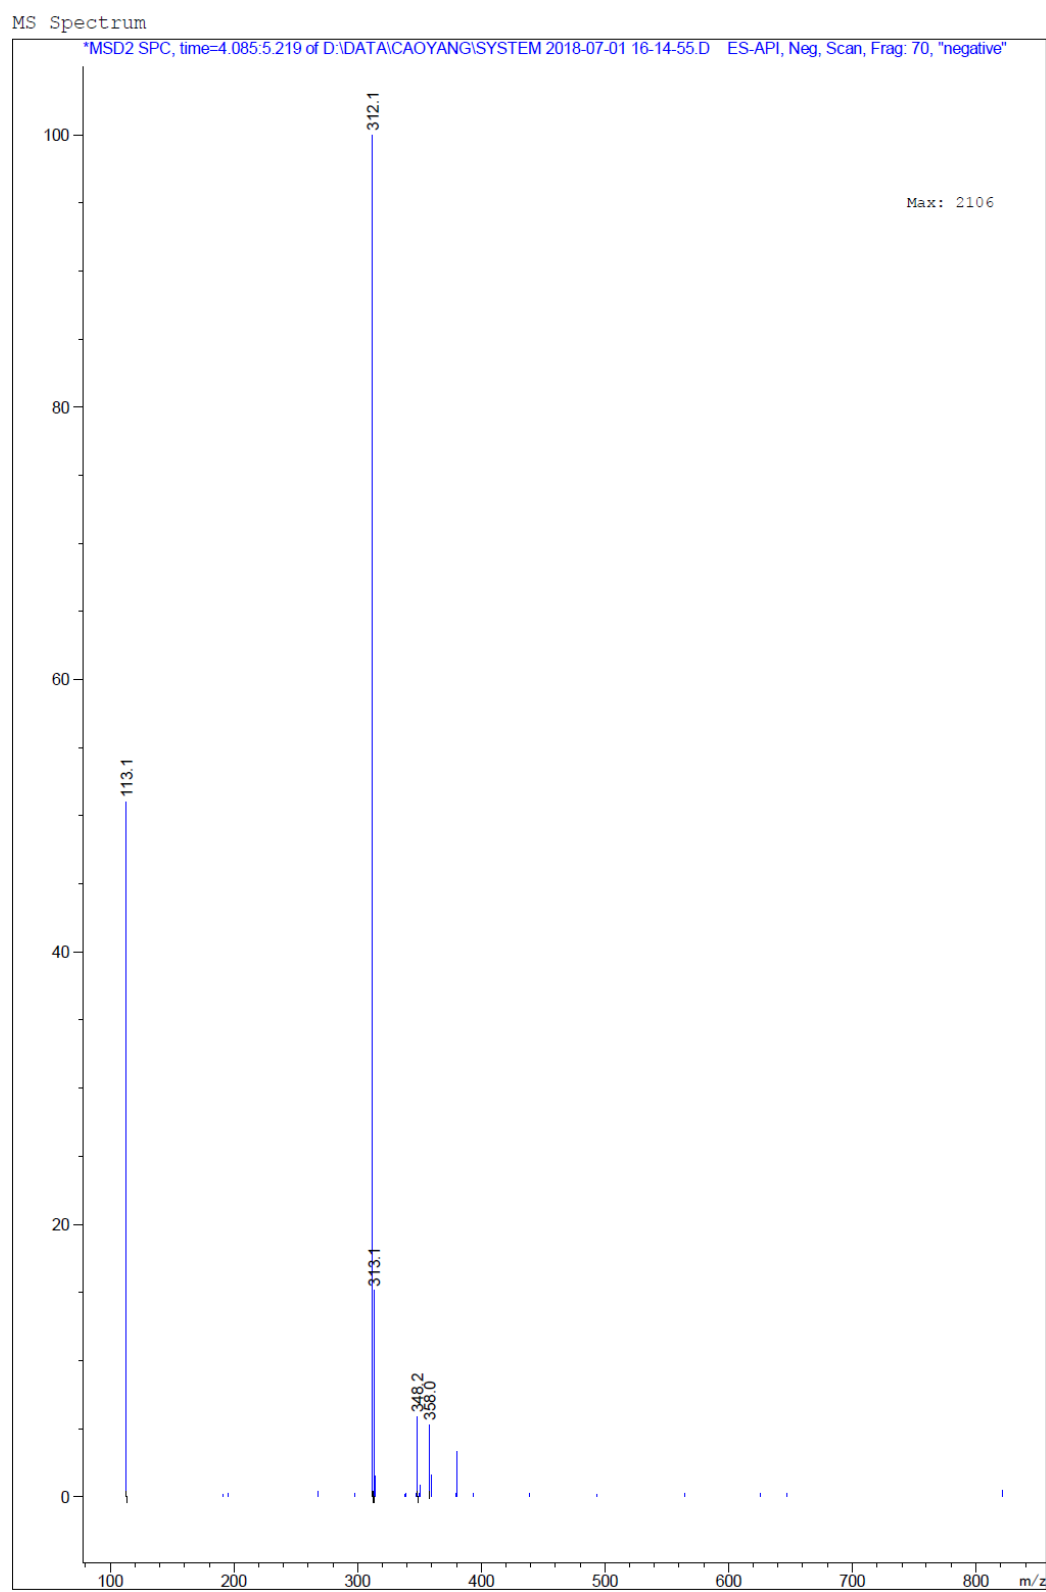

**Figure S155.** Mass spectrum (negative ionization) of **23a**

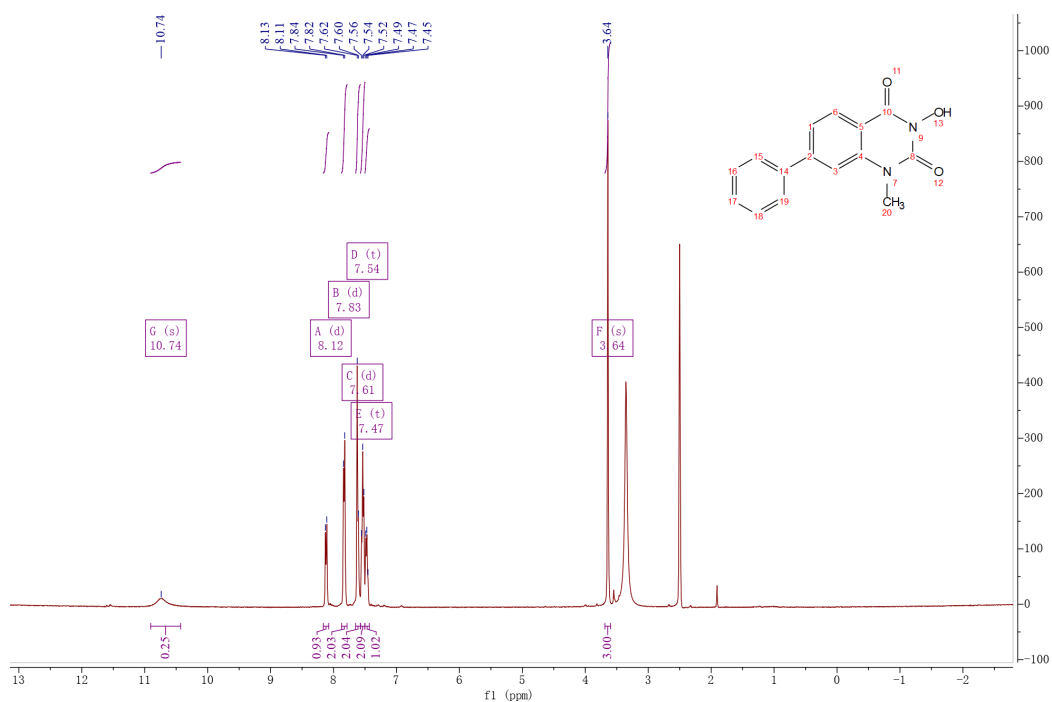

**Figure S156.**  $^1\text{H}$  NMR (400 MHz,  $\text{DMSO}-d_6$ ) spectrum of **23b**

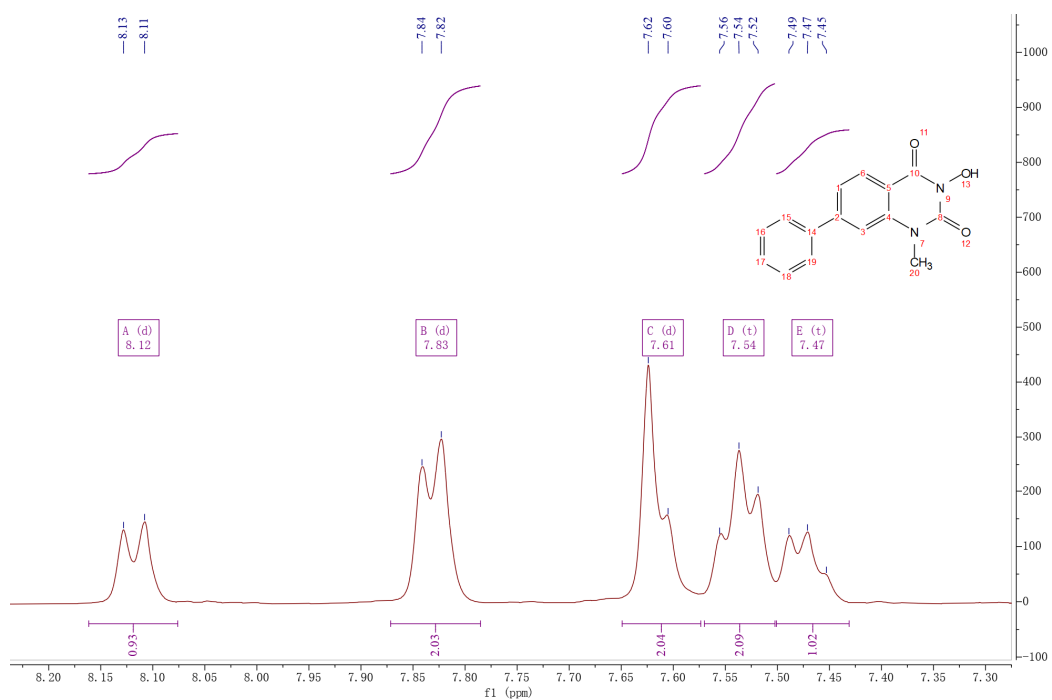

**Figure S157.** Magnified  $^1\text{H}$  NMR (400 MHz,  $\text{DMSO}-d_6$ ) spectrum fragments of **23b**

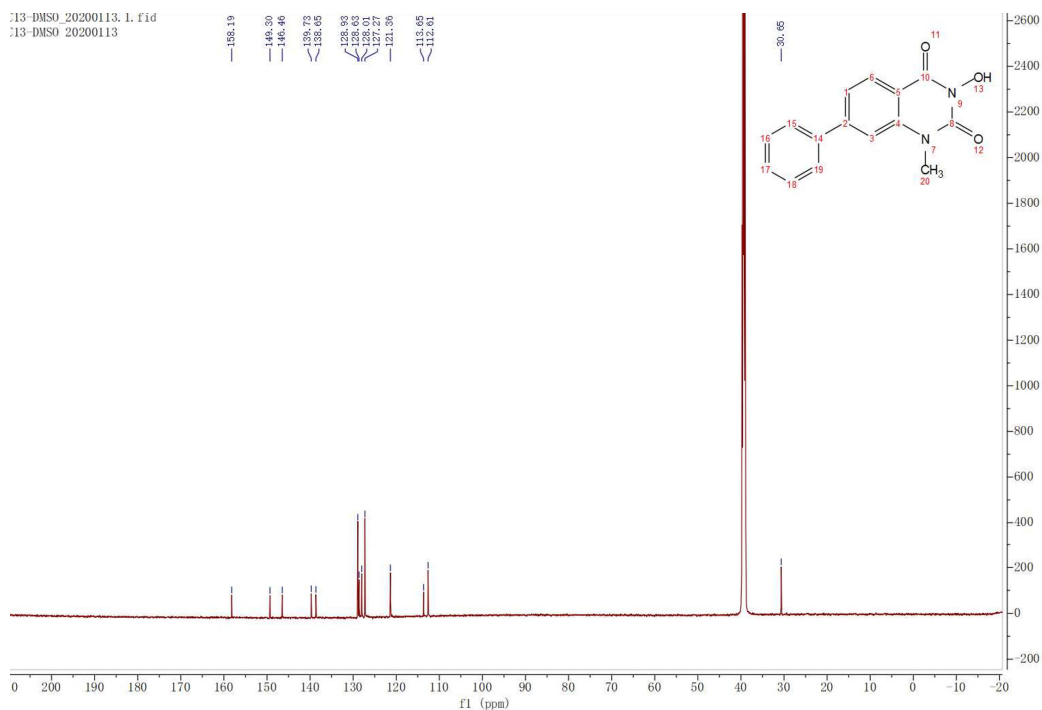

**Figure S158.**  $^{13}\text{C}$  NMR (151 MHz,  $\text{DMSO}-d_6$ ) spectrum of **23b**

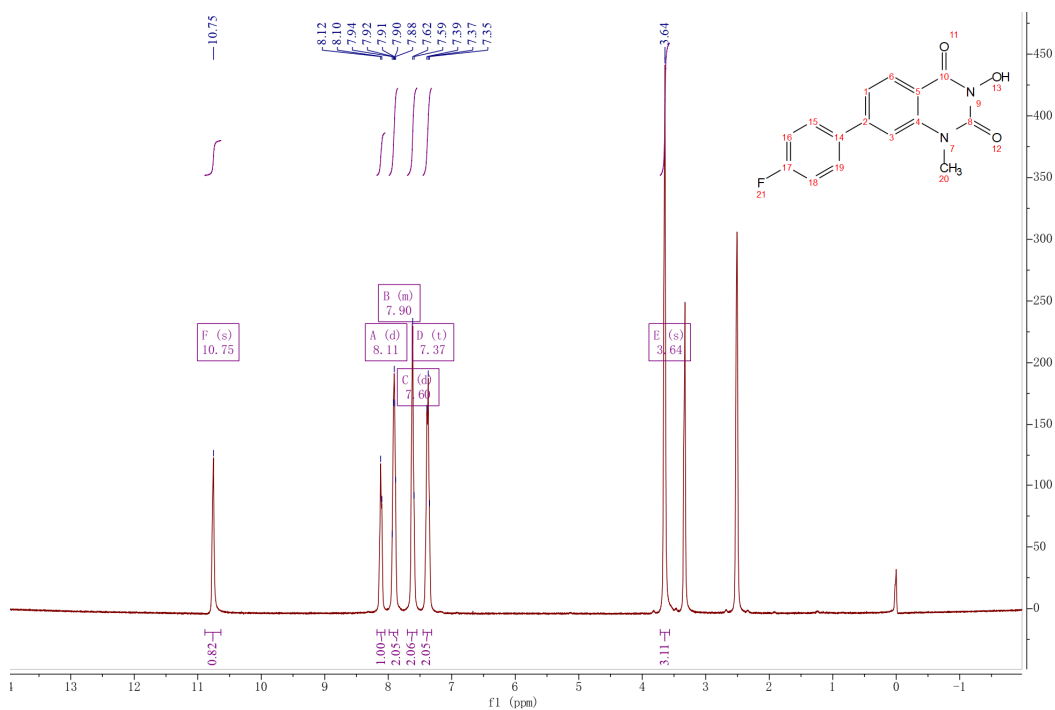

**Figure S159.**  $^1\text{H}$  NMR (400 MHz,  $\text{DMSO}-d_6$ ) spectrum of **23c**

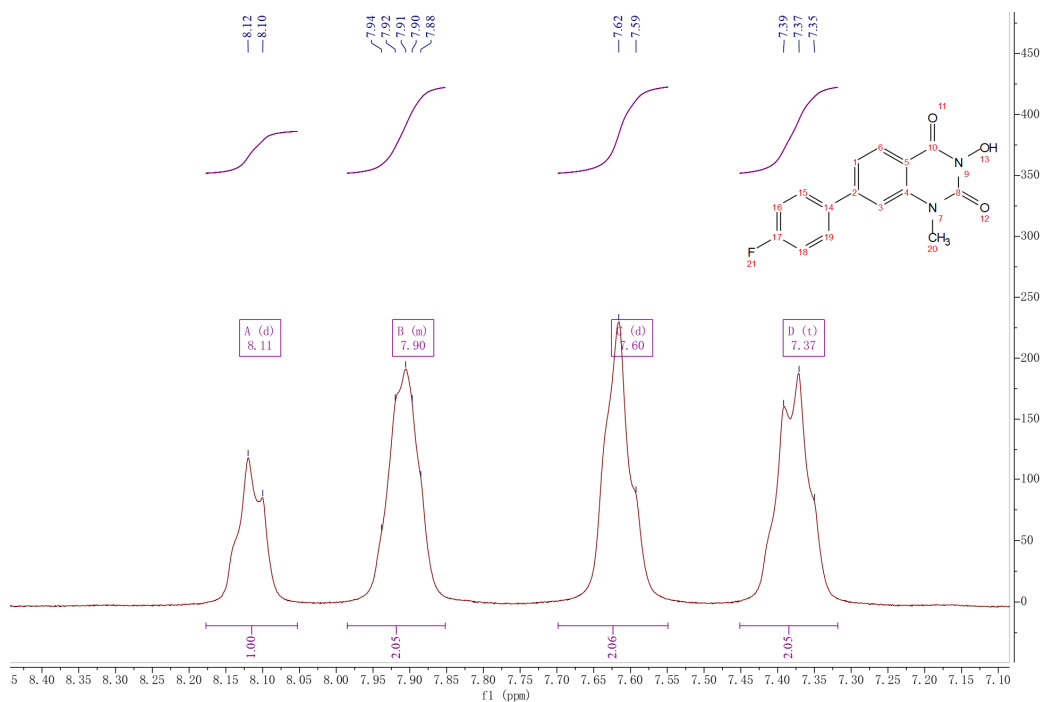

**Figure S160.** Magnified  $^1\text{H}$  NMR (400 MHz,  $\text{DMSO}-d_6$ ) spectrum fragments of **23c**

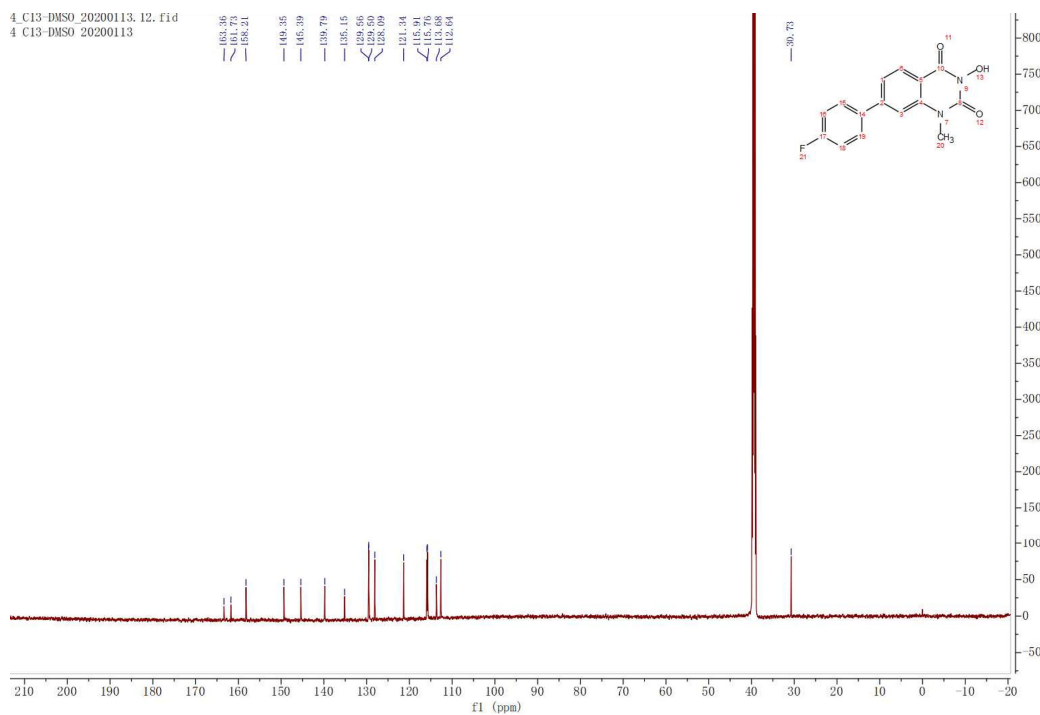

**Figure S161.**  $^{13}\text{C}$  NMR (151 MHz,  $\text{DMSO}-d_6$ ) spectrum of **23c**

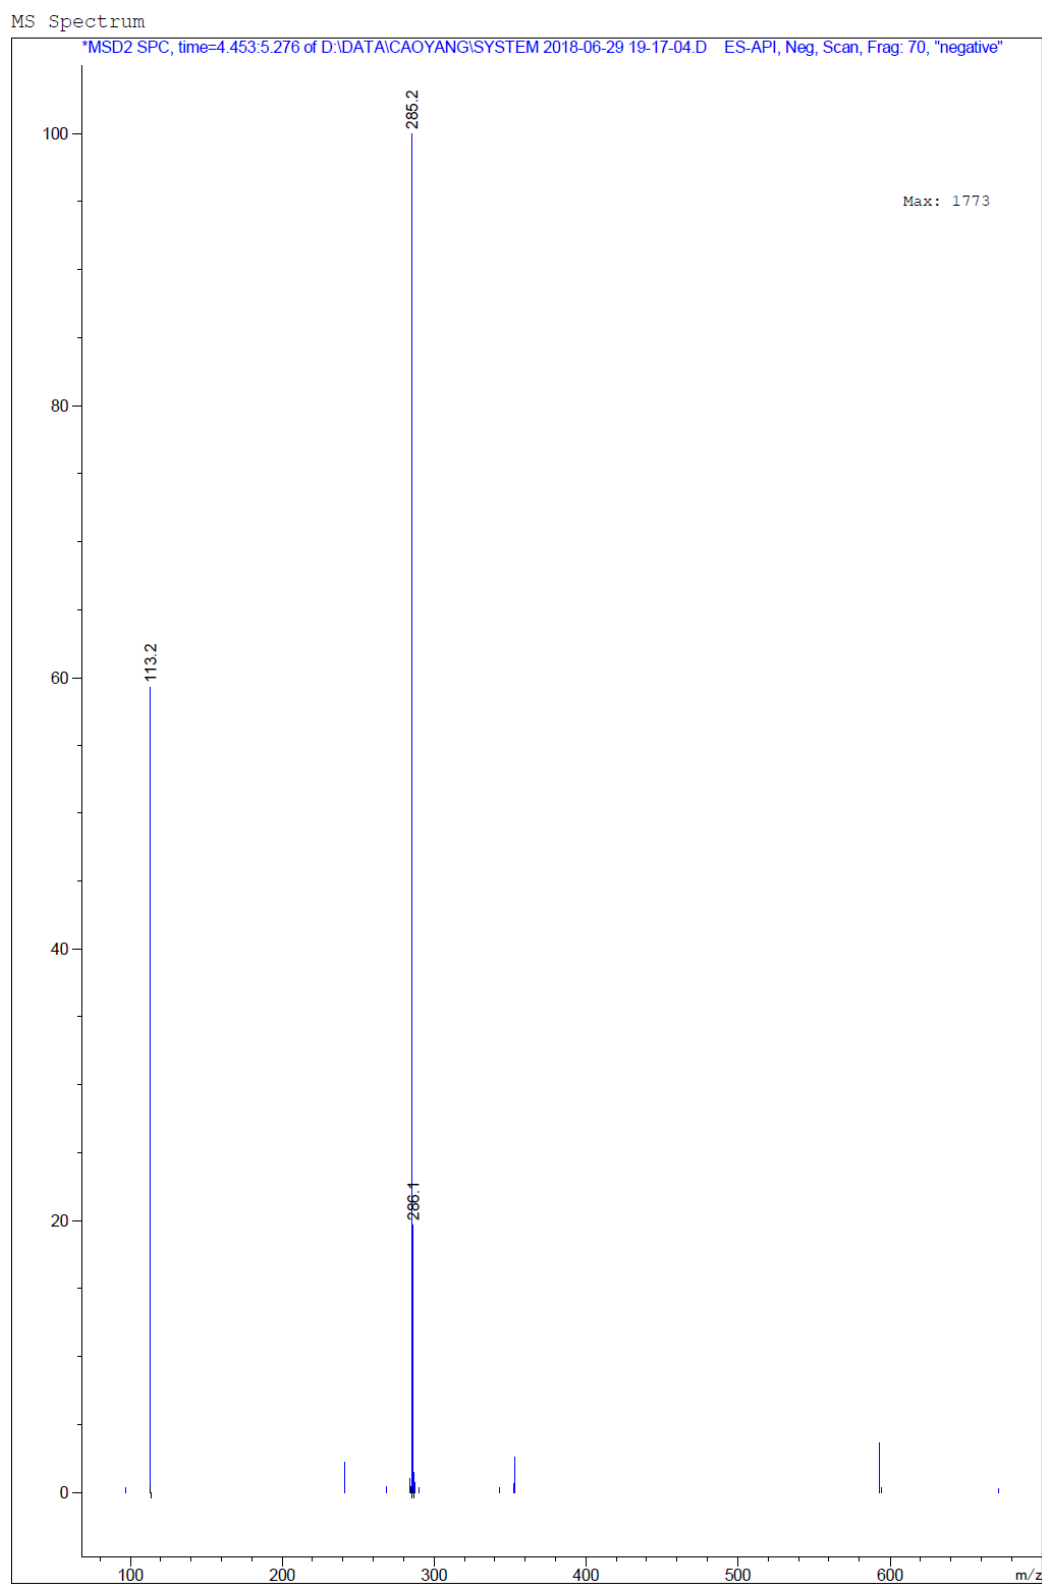

**Figure S162.** Mass spectrum (negative ionization) of **23c**

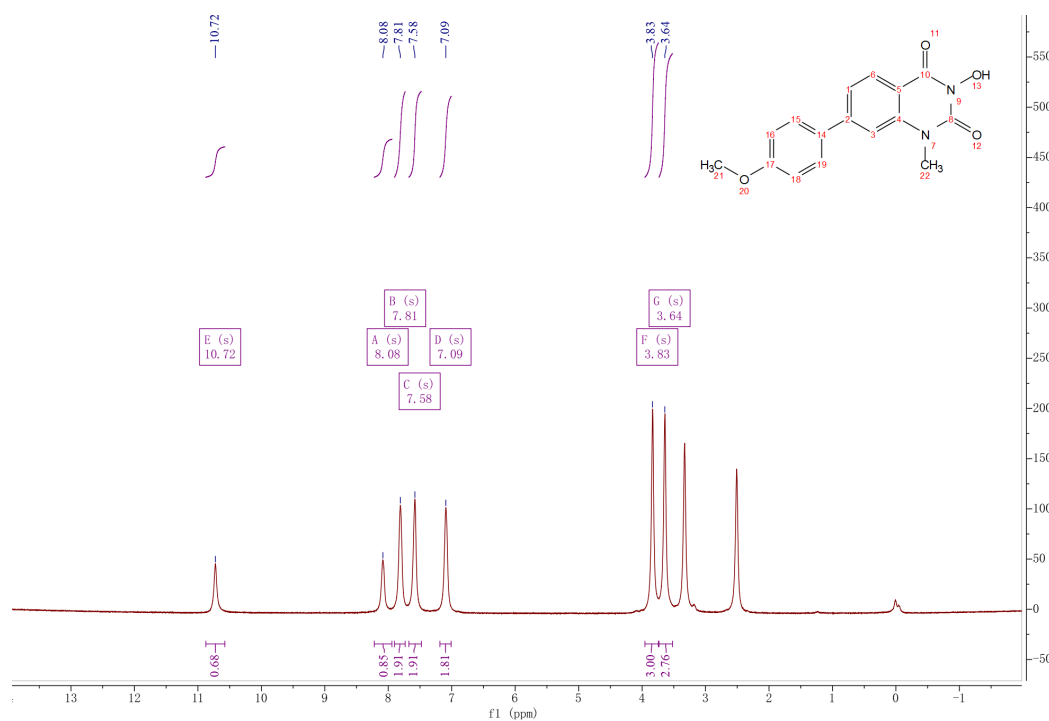

**Figure S163.** <sup>1</sup>H NMR (400 MHz, DMSO-*d*<sub>6</sub>) spectrum of **23d**

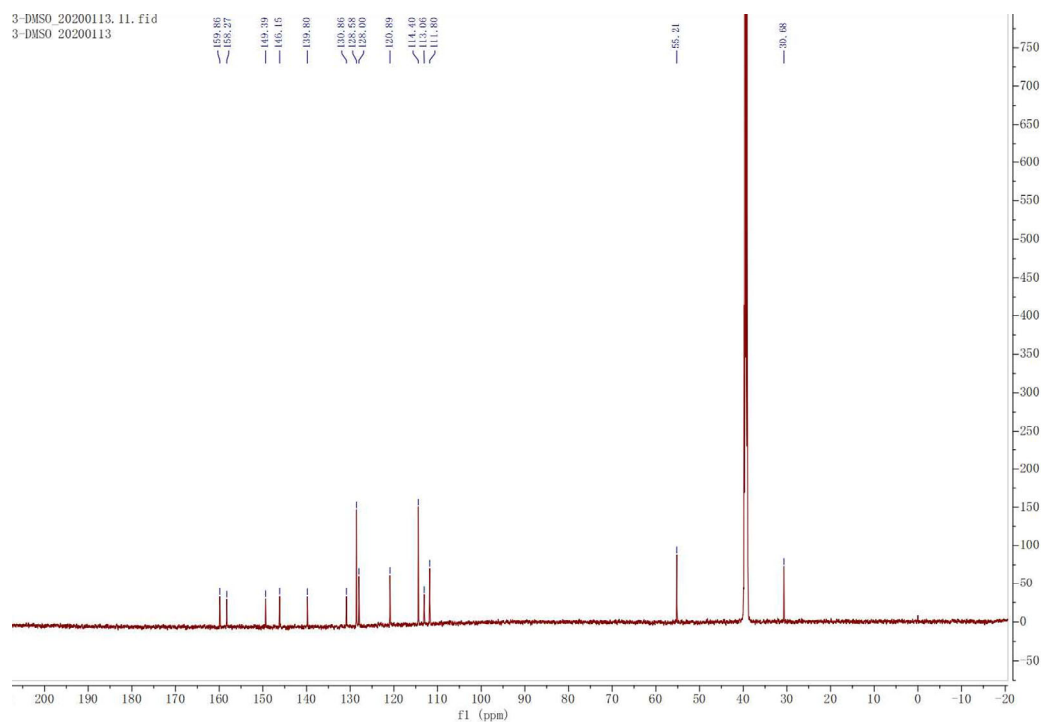

**Figure S164.** <sup>13</sup>C NMR (151 MHz, DMSO-*d*<sub>6</sub>) spectrum of **23d**

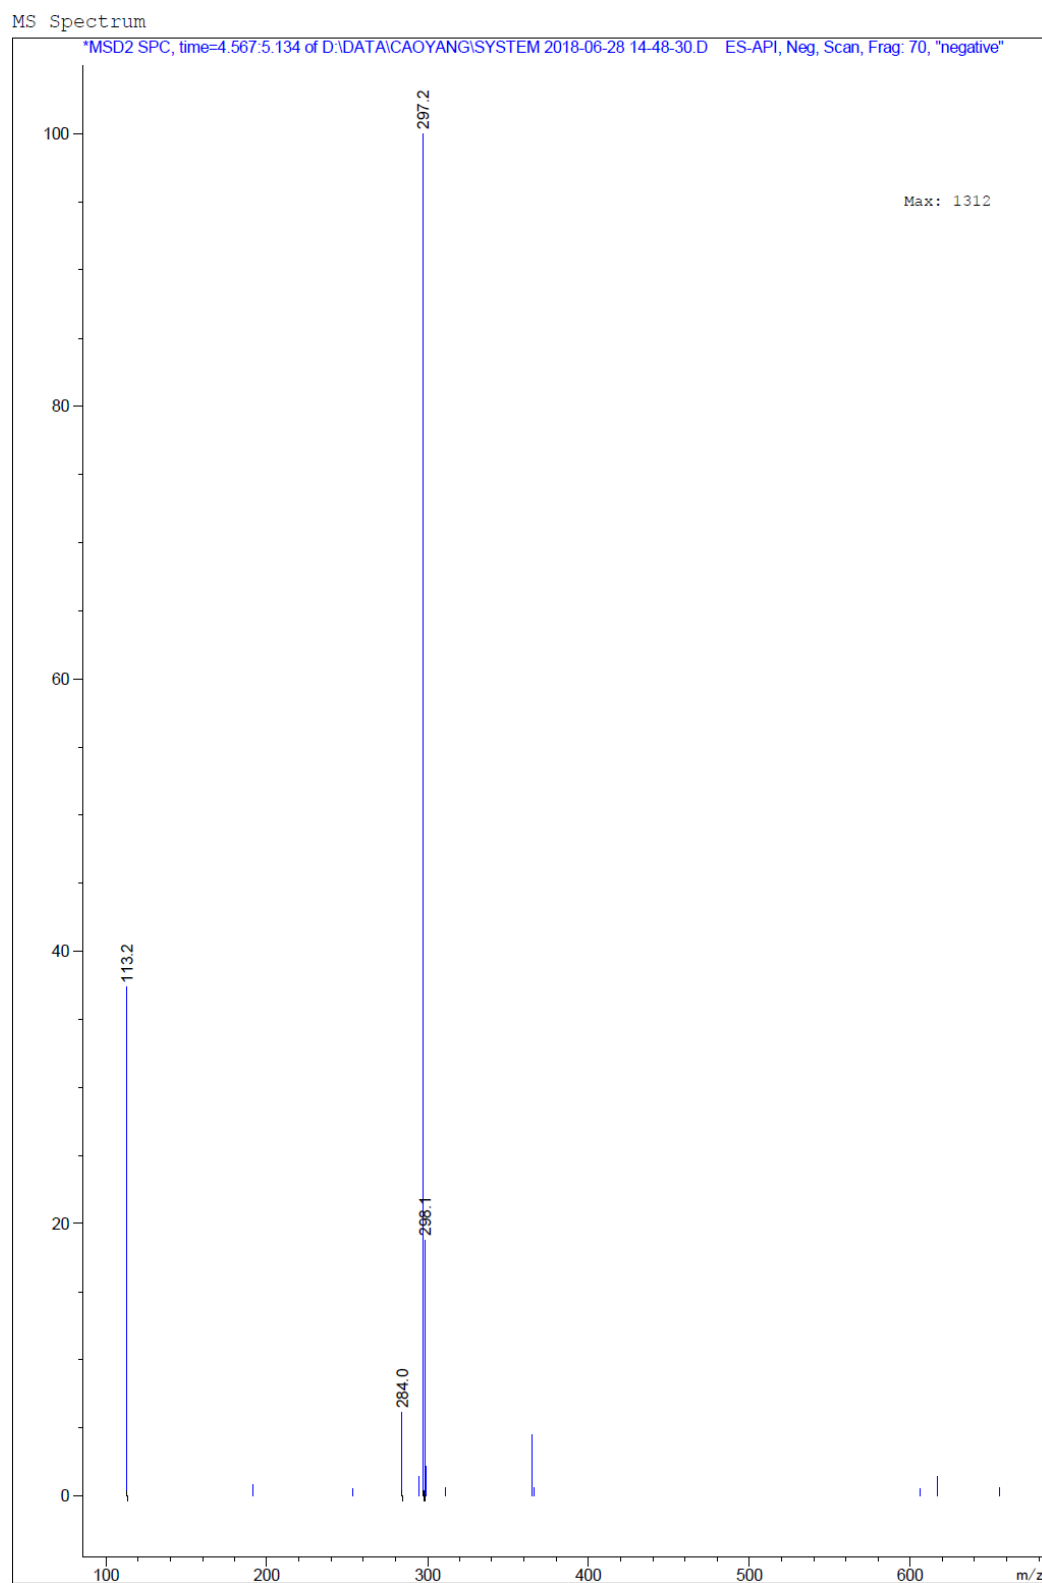

**Figure S165.** Mass spectrum (negative ionization) of **23d**

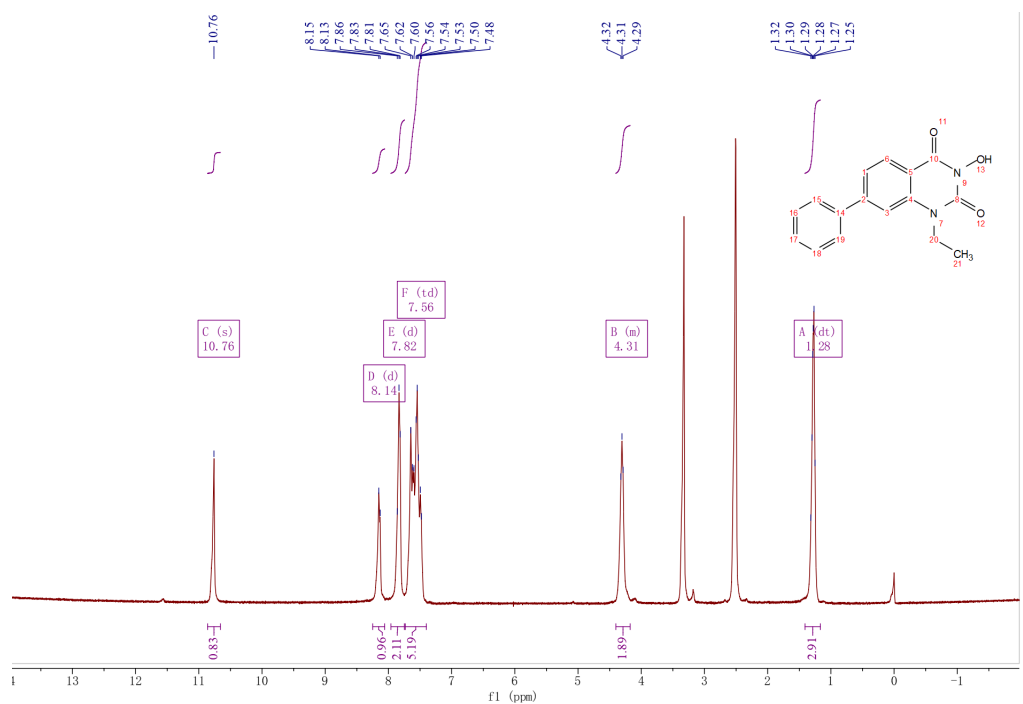

**Figure S166.**  $^1\text{H}$  NMR (400 MHz,  $\text{DMSO}-d_6$ ) spectrum of **23e**

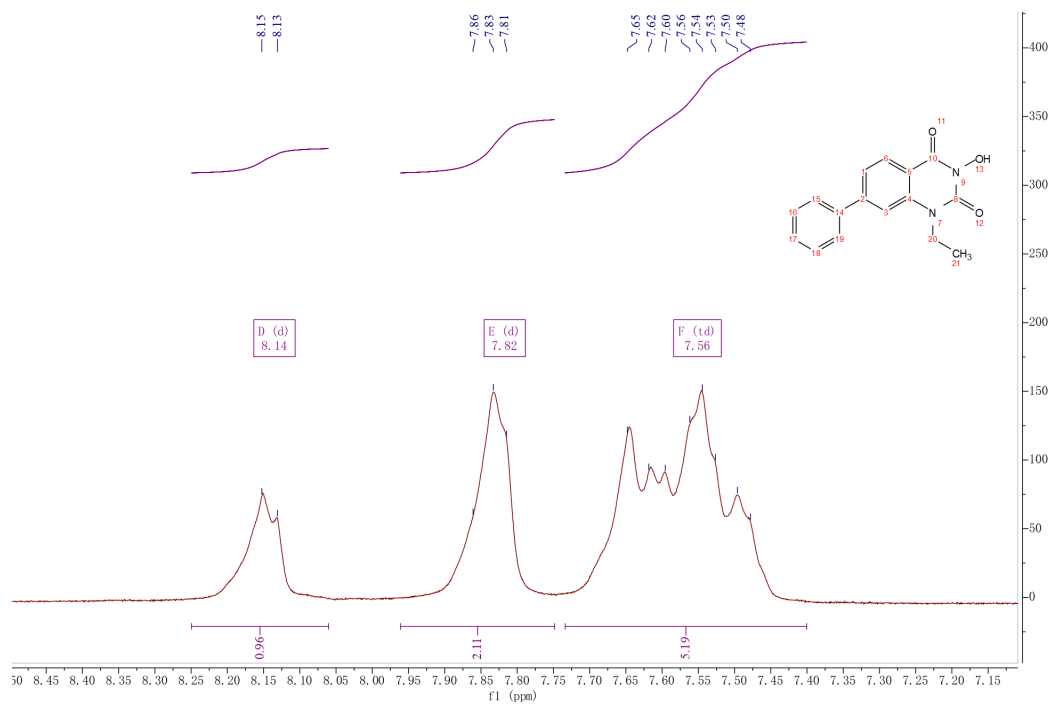

**Figure S167.** Magnified  $^1\text{H}$  NMR (400 MHz,  $\text{DMSO}-d_6$ ) spectrum fragments of **23e**



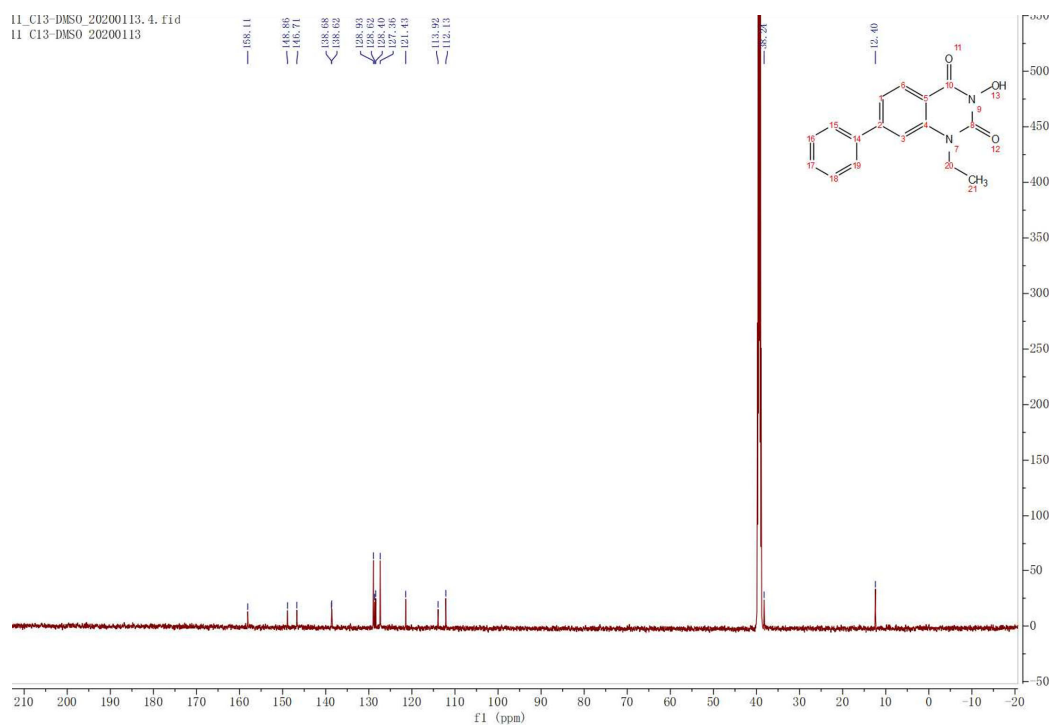

**Figure S168.**  $^{13}\text{C}$  NMR (151 MHz,  $\text{DMSO-}d_6$ ) spectrum of **23e**

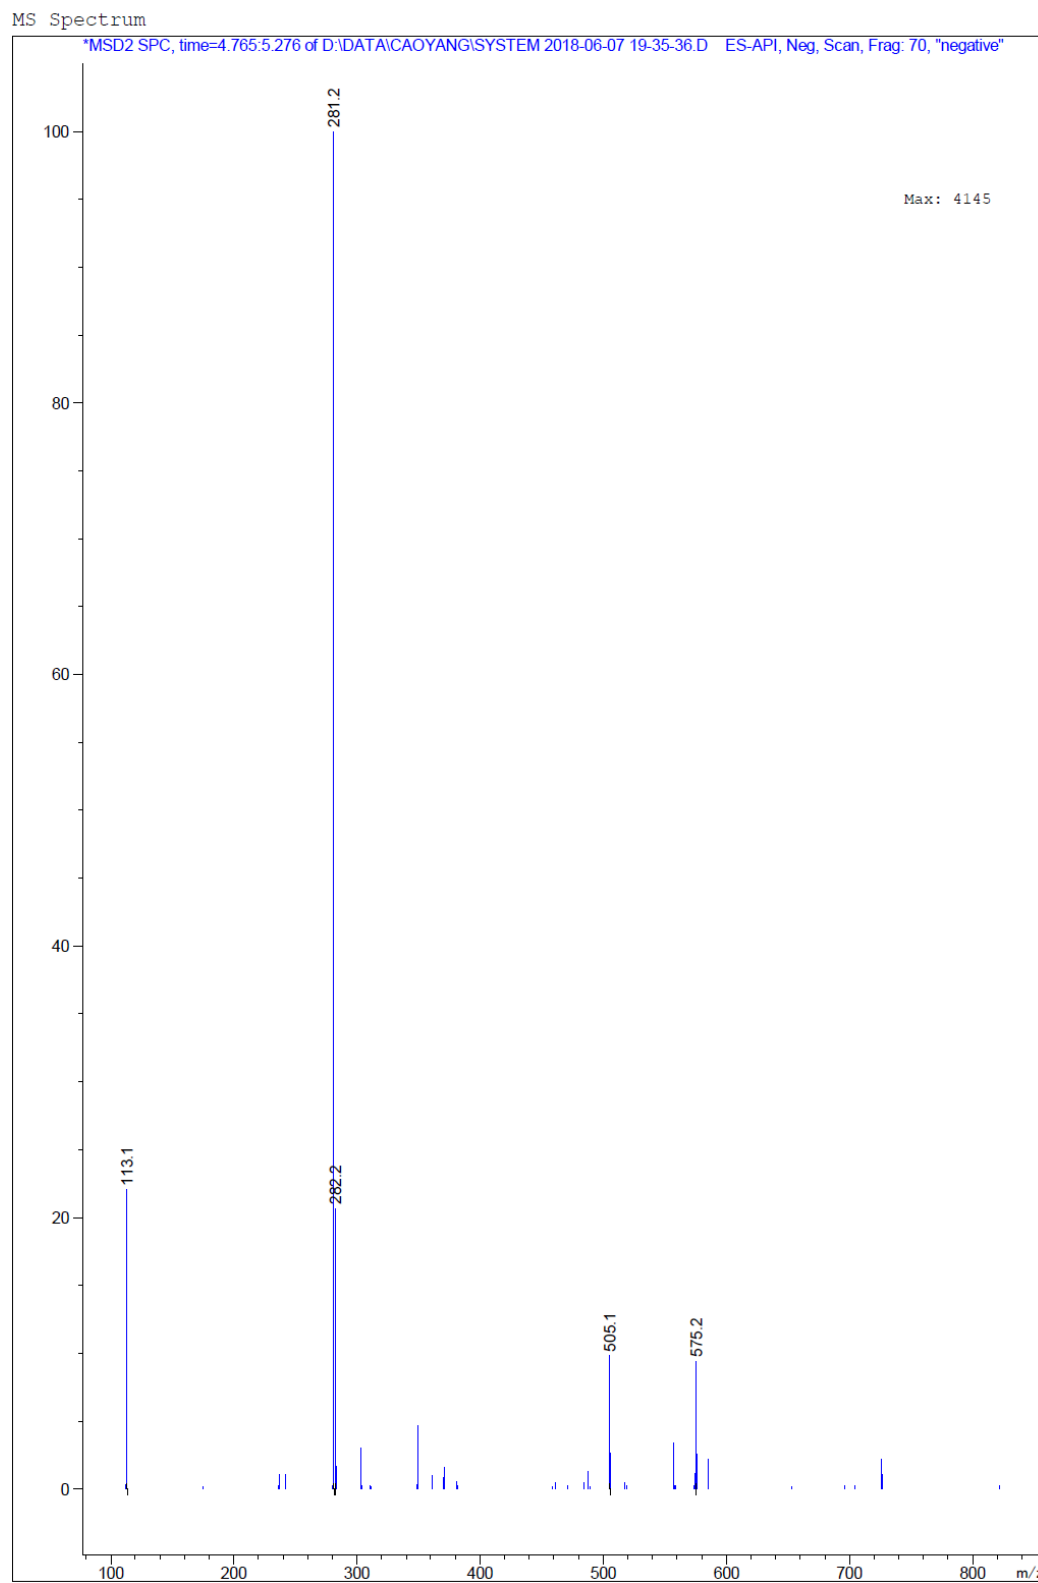

**Figure S169.** Mass spectrum (negative ionization) of **23e**

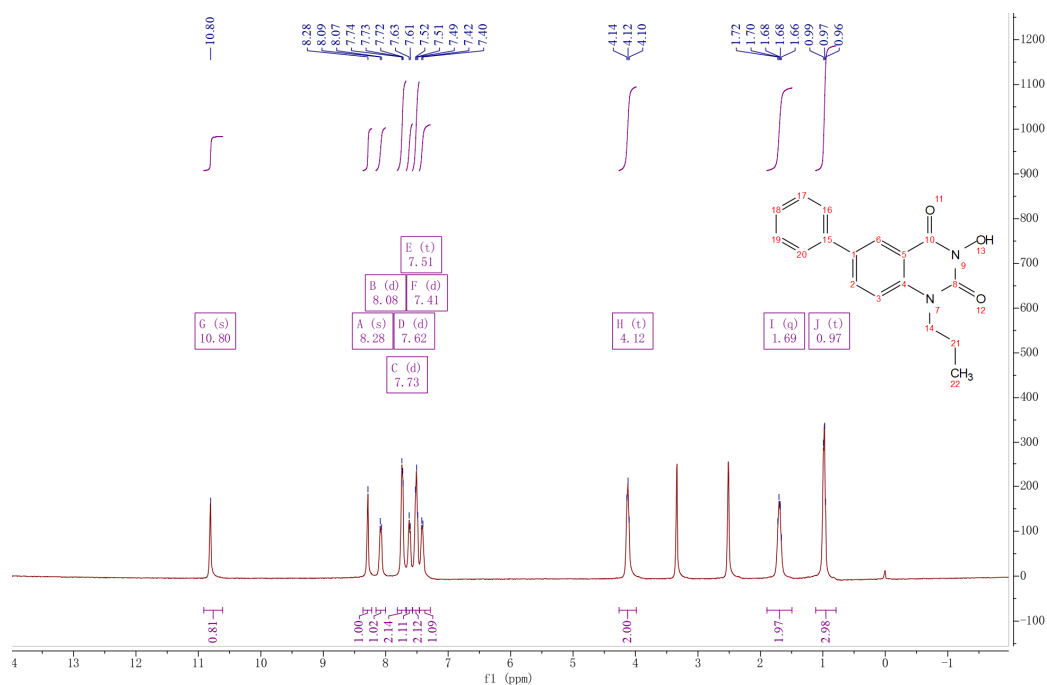

**Figure S170.**  $^1\text{H}$  NMR (400 MHz,  $\text{DMSO}-d_6$ ) spectrum of **23f**

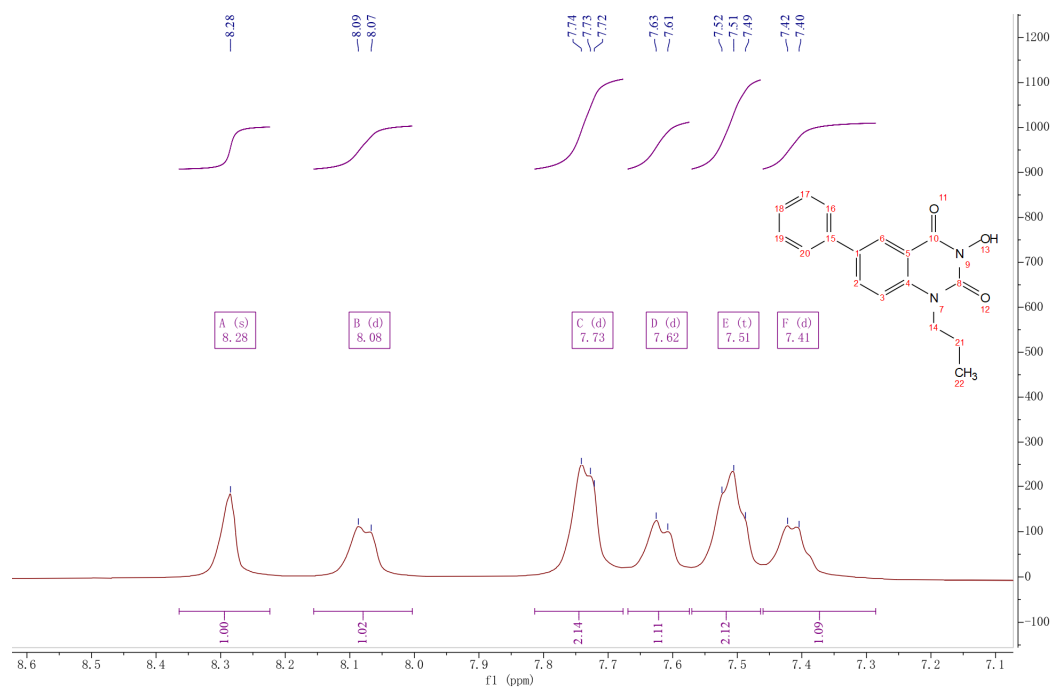

**Figure S171.** Magnified  $^1\text{H}$  NMR (400 MHz,  $\text{DMSO}-d_6$ ) spectrum fragments of **23f**

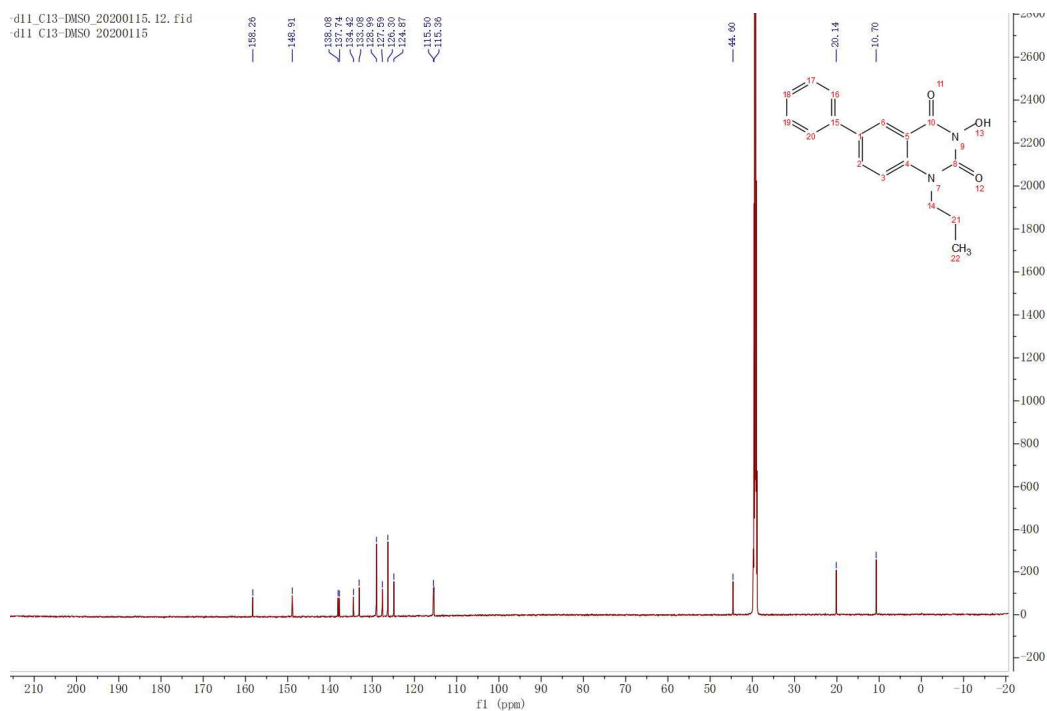

**Figure S172.**  $^{13}\text{C}$  NMR (151 MHz,  $\text{DMSO}-d_6$ ) spectrum of **23f**

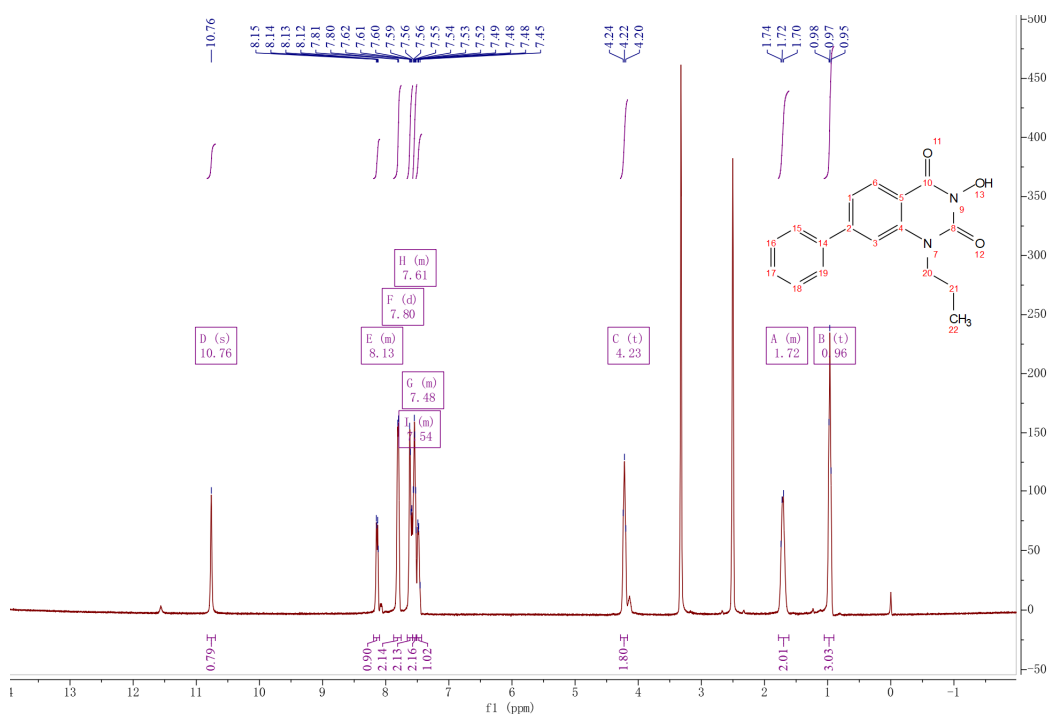

**Figure S173.**  $^1\text{H}$  NMR (400 MHz,  $\text{DMSO}-d_6$ ) spectrum of **23g**

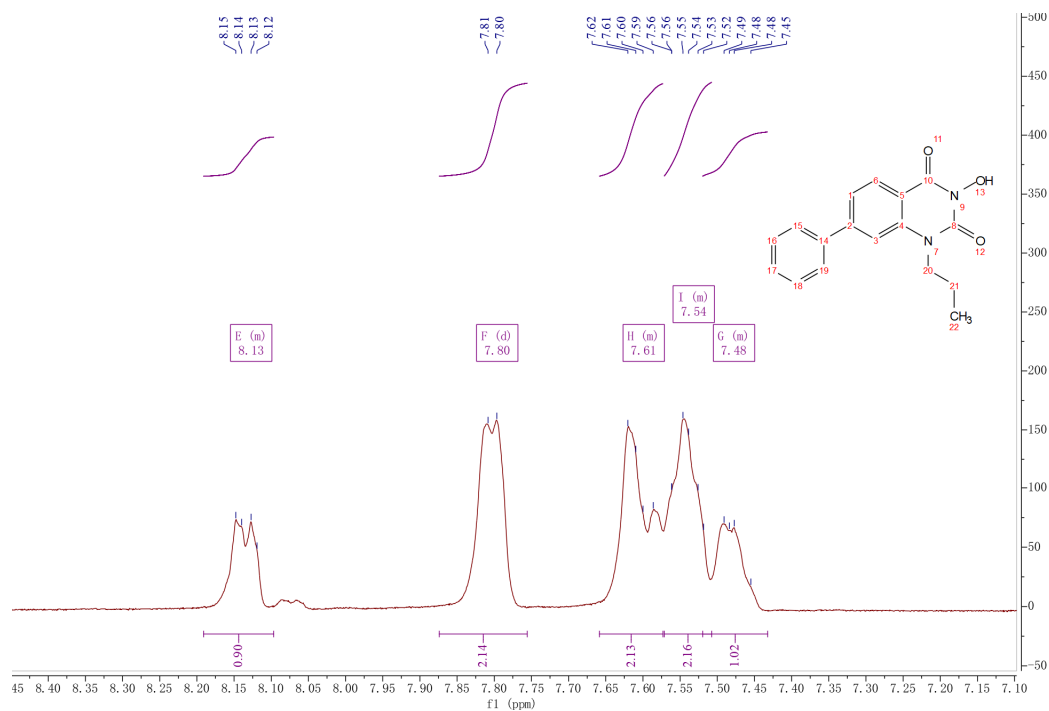

**Figure S174.** Magnified  $^1\text{H}$  NMR (400 MHz,  $\text{DMSO}-d_6$ ) spectrum fragments of **23g**

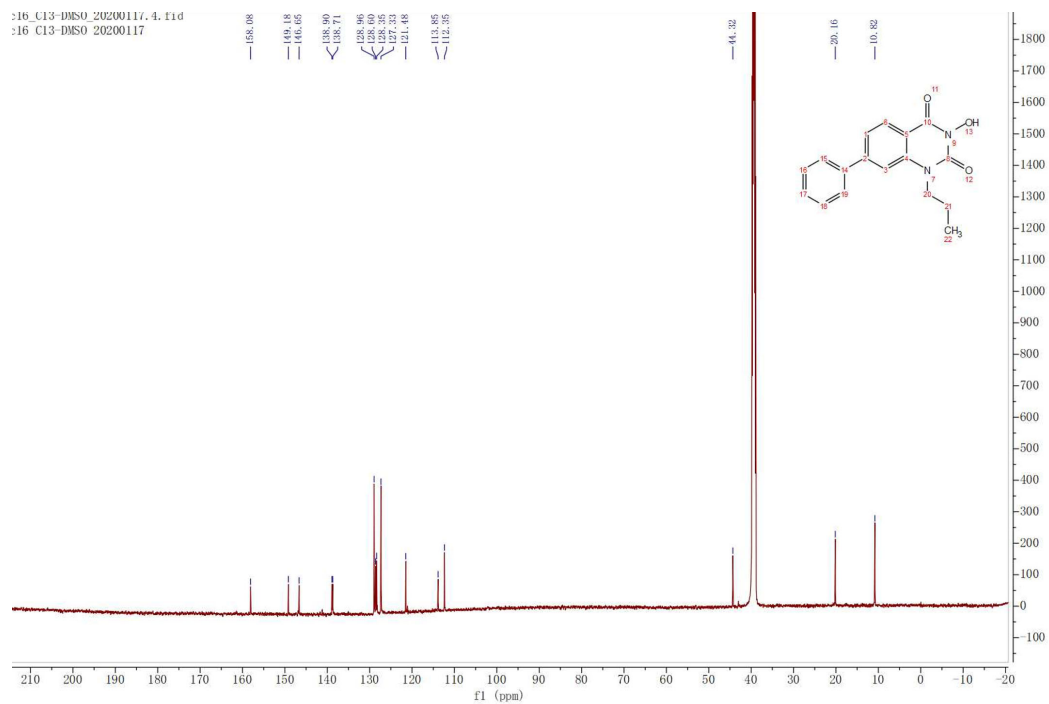

**Figure S175.**  $^{13}\text{C}$  NMR (151 MHz,  $\text{DMSO}-d_6$ ) spectrum of **23g**

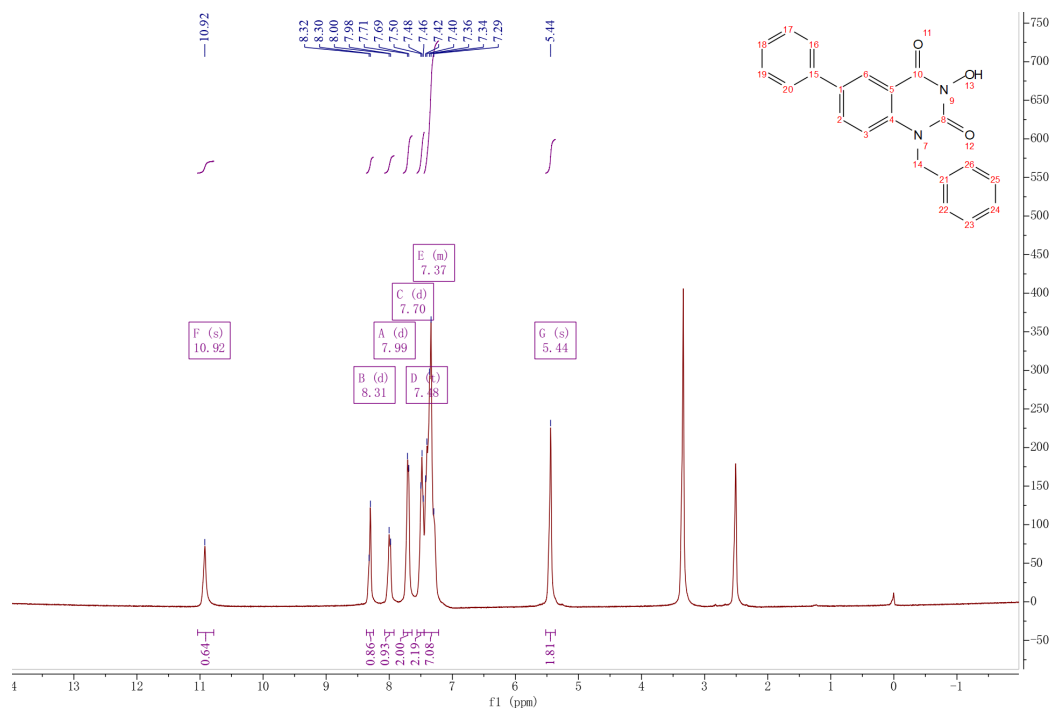

**Figure S176.**  $^1\text{H}$  NMR (400 MHz,  $\text{DMSO}-d_6$ ) spectrum of **23h**

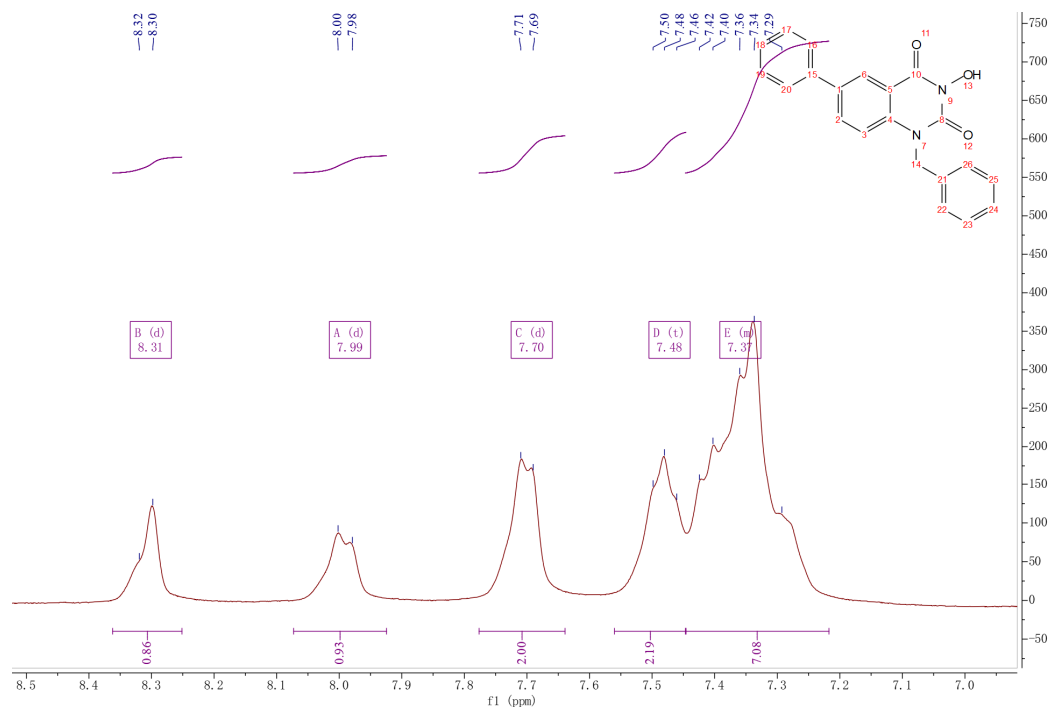

**Figure S177.** Magnified  $^1\text{H}$  NMR (400 MHz,  $\text{DMSO}-d_6$ ) spectrum fragments of **23h**

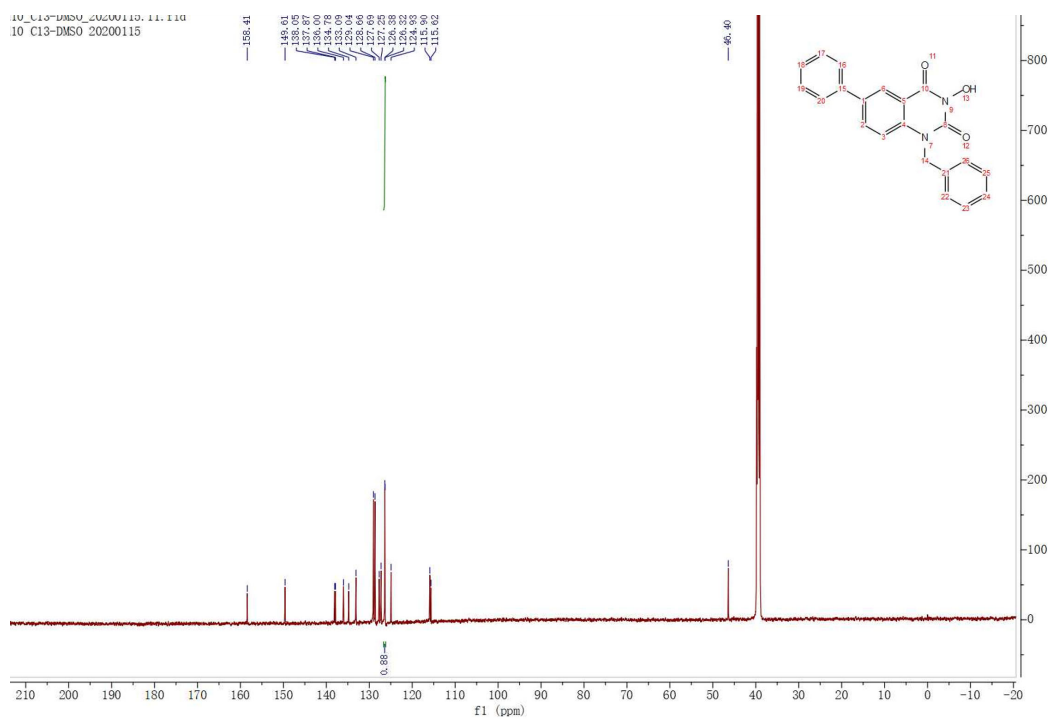

**Figure S178.**  $^{13}\text{C}$  NMR (151 MHz, DMSO- $d_6$ ) spectrum of **23h**

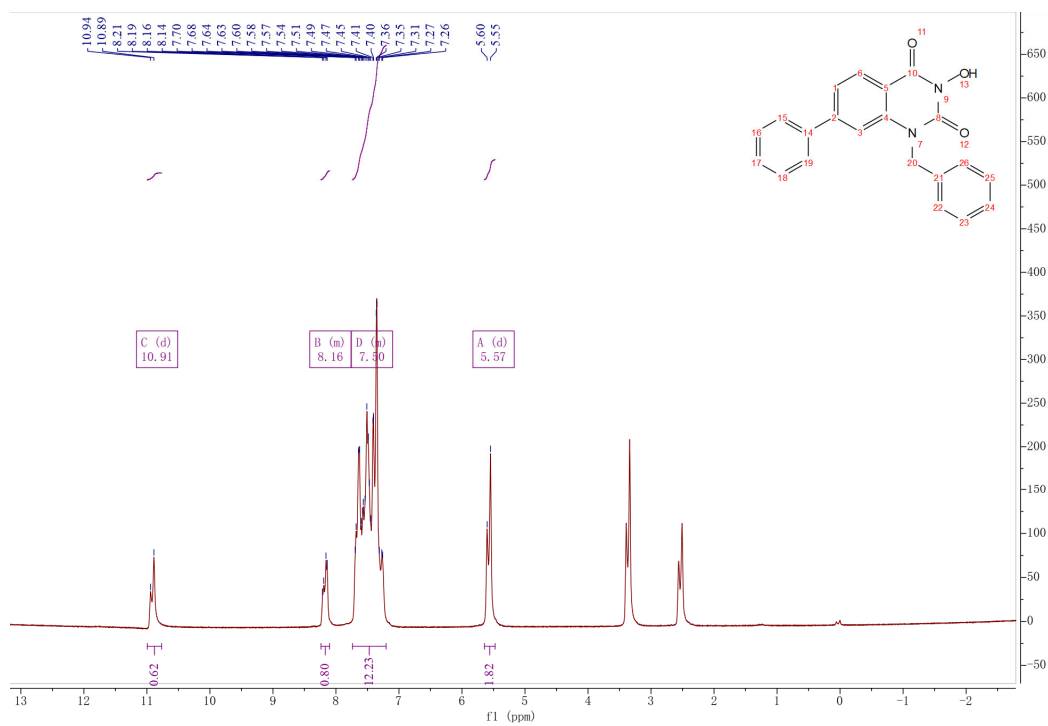

**Figure S179.**  $^1\text{H}$  NMR (400 MHz, DMSO- $d_6$ ) spectrum of **23i**

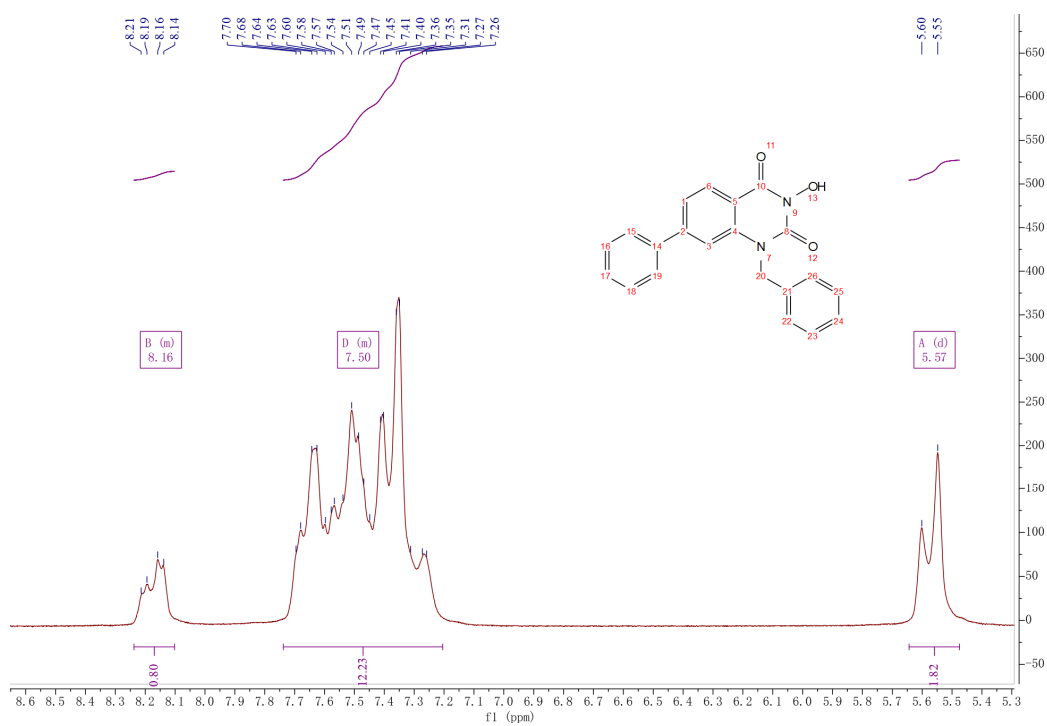

**Figure S180.** Magnified  $^1\text{H}$  NMR (400 MHz,  $\text{DMSO}-d_6$ ) spectrum fragments of **23i**

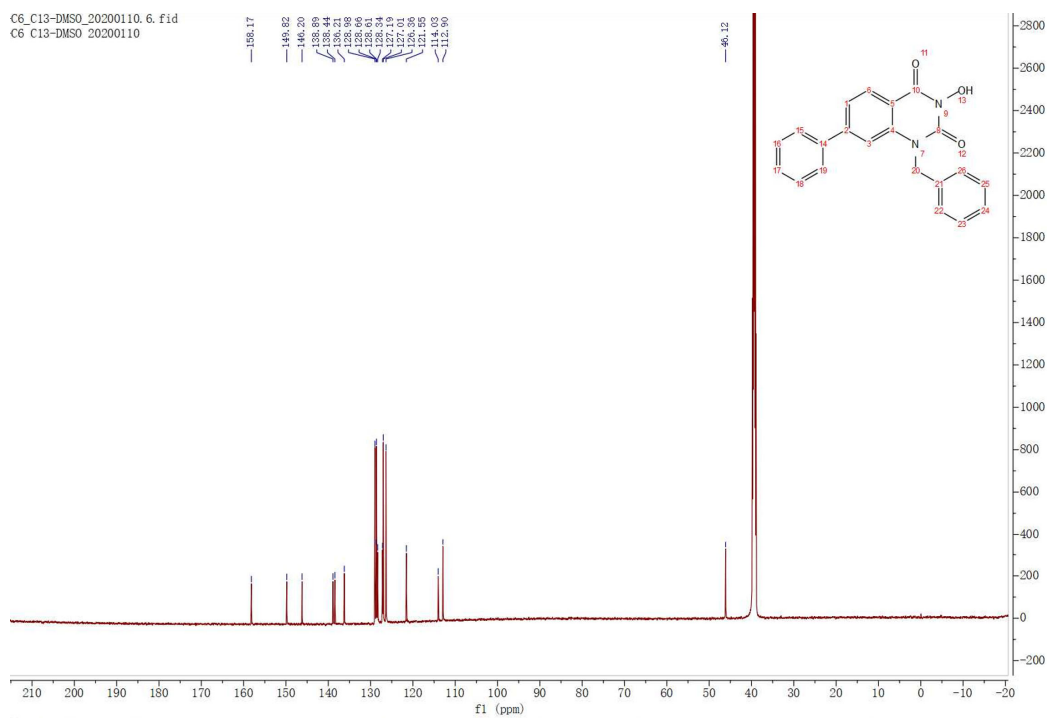

**Figure S181.**  $^{13}\text{C}$  NMR (151 MHz,  $\text{DMSO}-d_6$ ) spectrum of **23i**



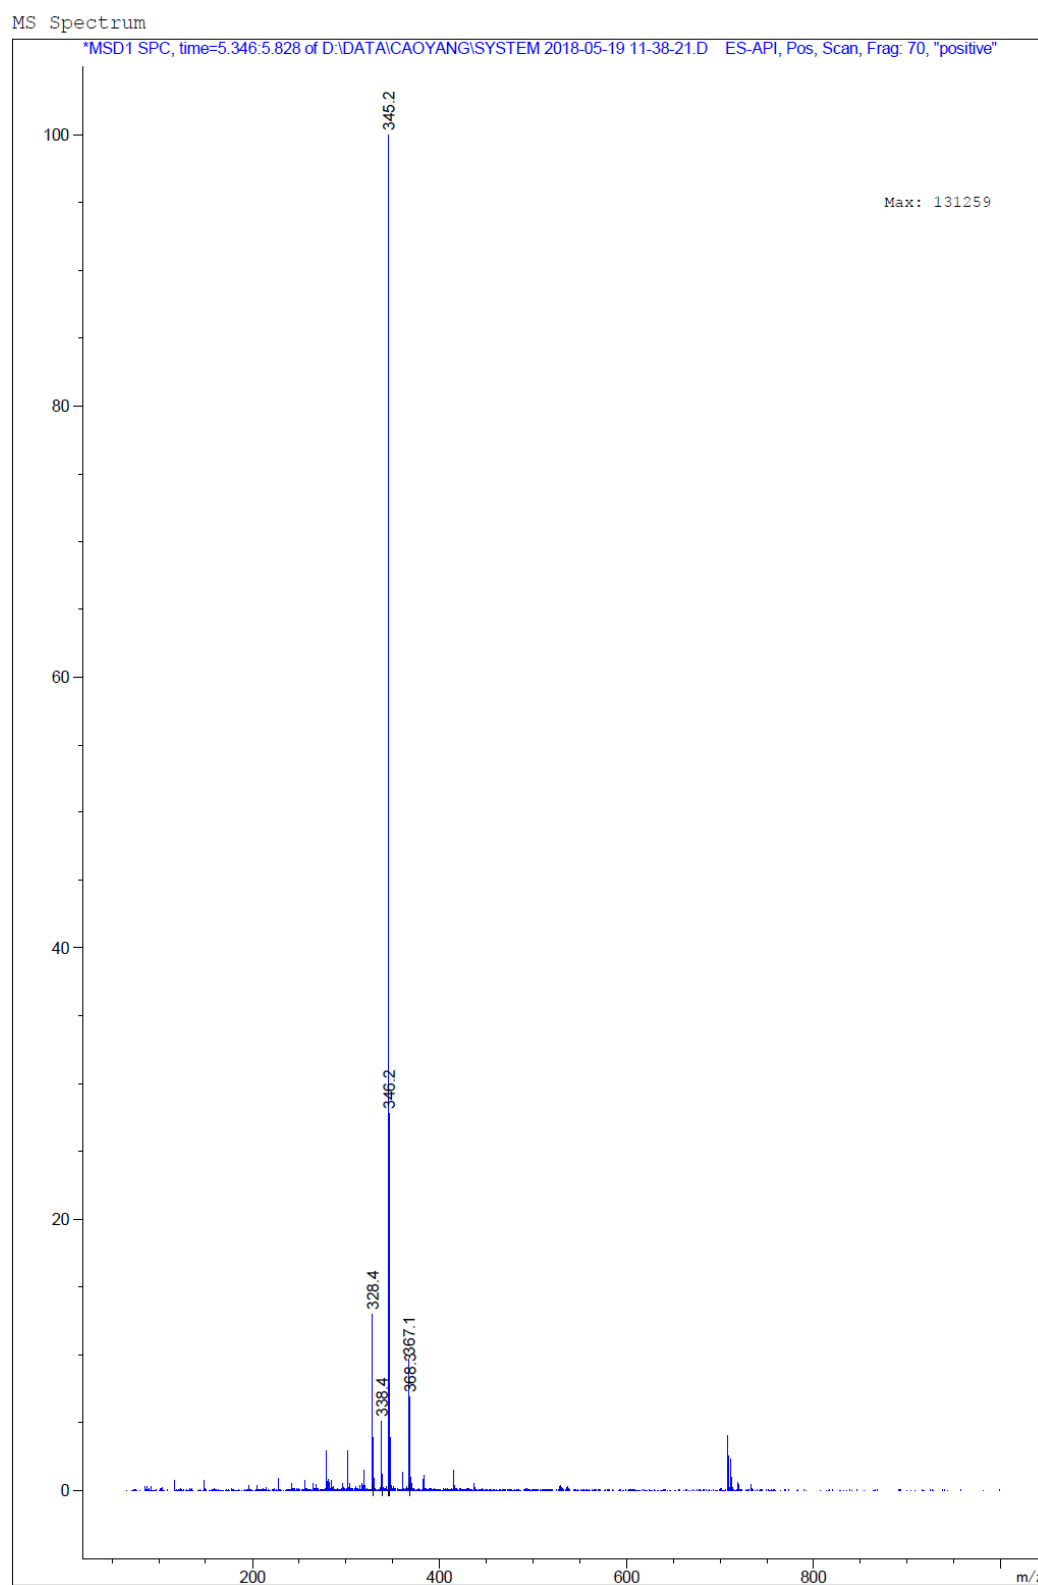

**Figure S182.** Mass spectrum (positive ionization) of **23i**

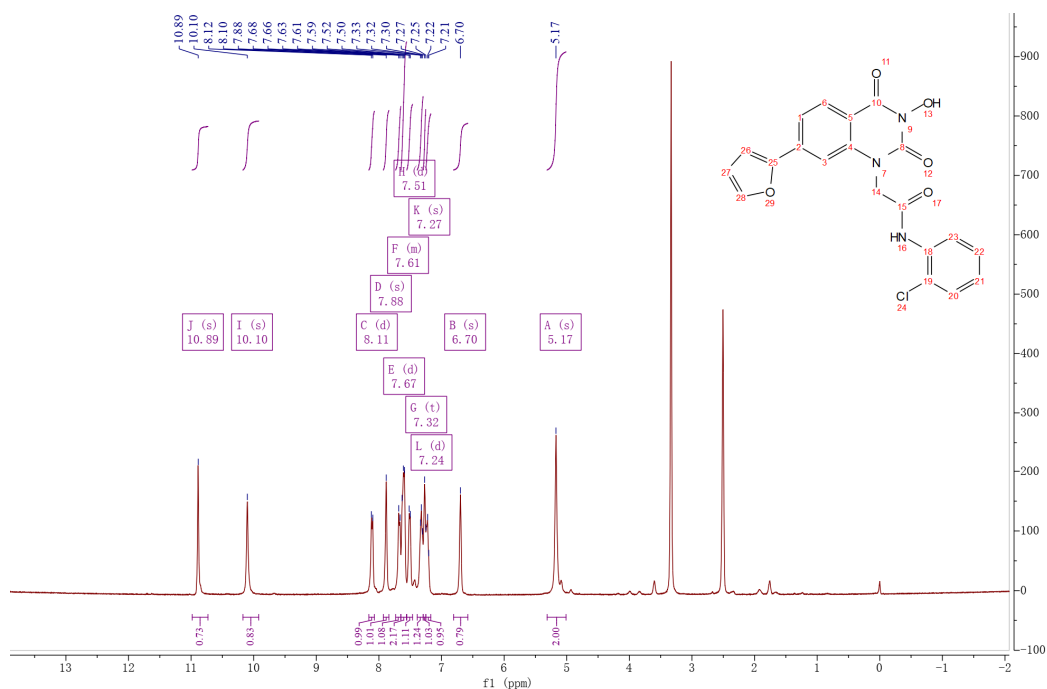

**Figure S183.**  $^1\text{H}$  NMR (400 MHz,  $\text{DMSO}-d_6$ ) spectrum of **23j**

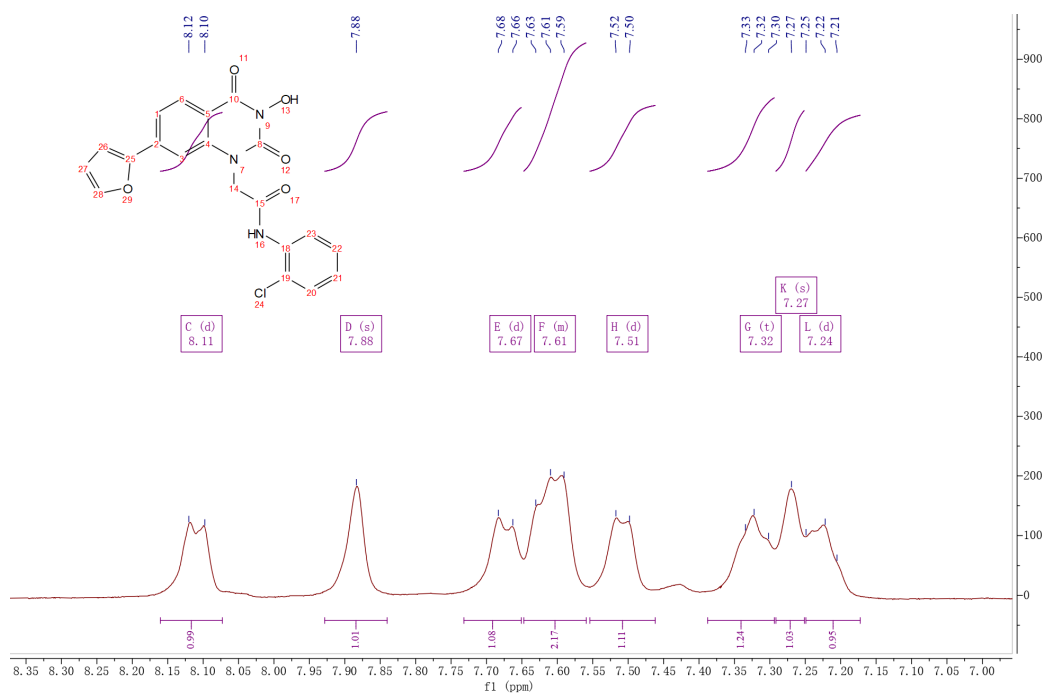

**Figure S184.** Magnified  $^1\text{H}$  NMR (400 MHz,  $\text{DMSO}-d_6$ ) spectrum fragments of **23j**

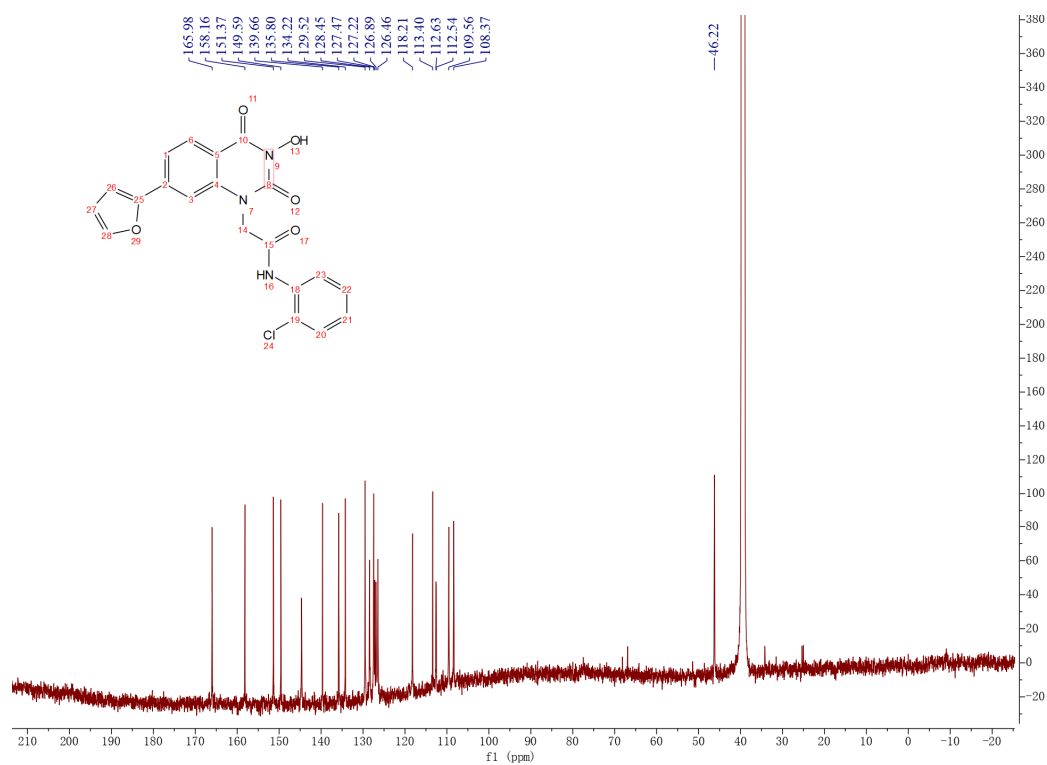

**Figure S185.**  $^{13}\text{C}$  NMR (151 MHz,  $\text{DMSO}-d_6$ ) spectrum of **23j**
